# Supplementary material for: Candida albicans Sfl1/Sfl2 regulatory network drives the formation of pathogenic microcolonies
Source: PubMed Central journal article supplement (PMC6173444; doi:10.1371/journal.ppat.1007316), 2018-09-25
Supplement: ppat.1007316.s001.pdf [file ppat.1007316.s001.pdf]

**A**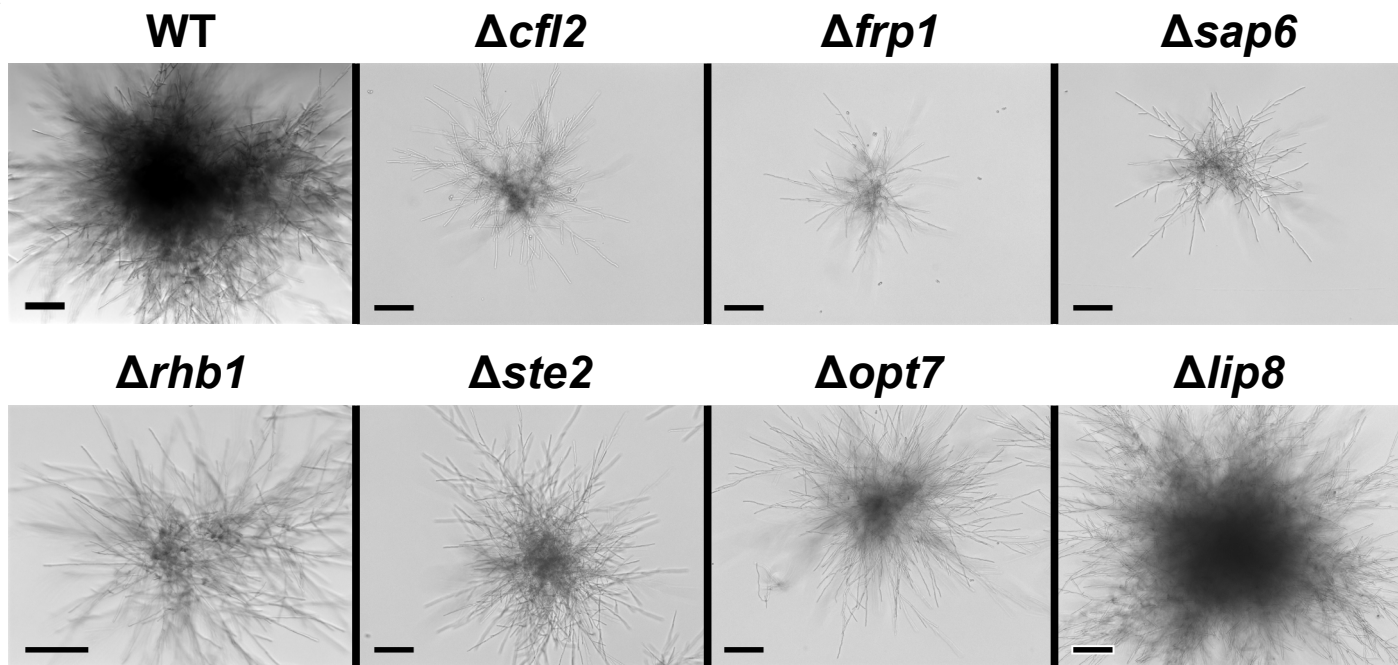**B**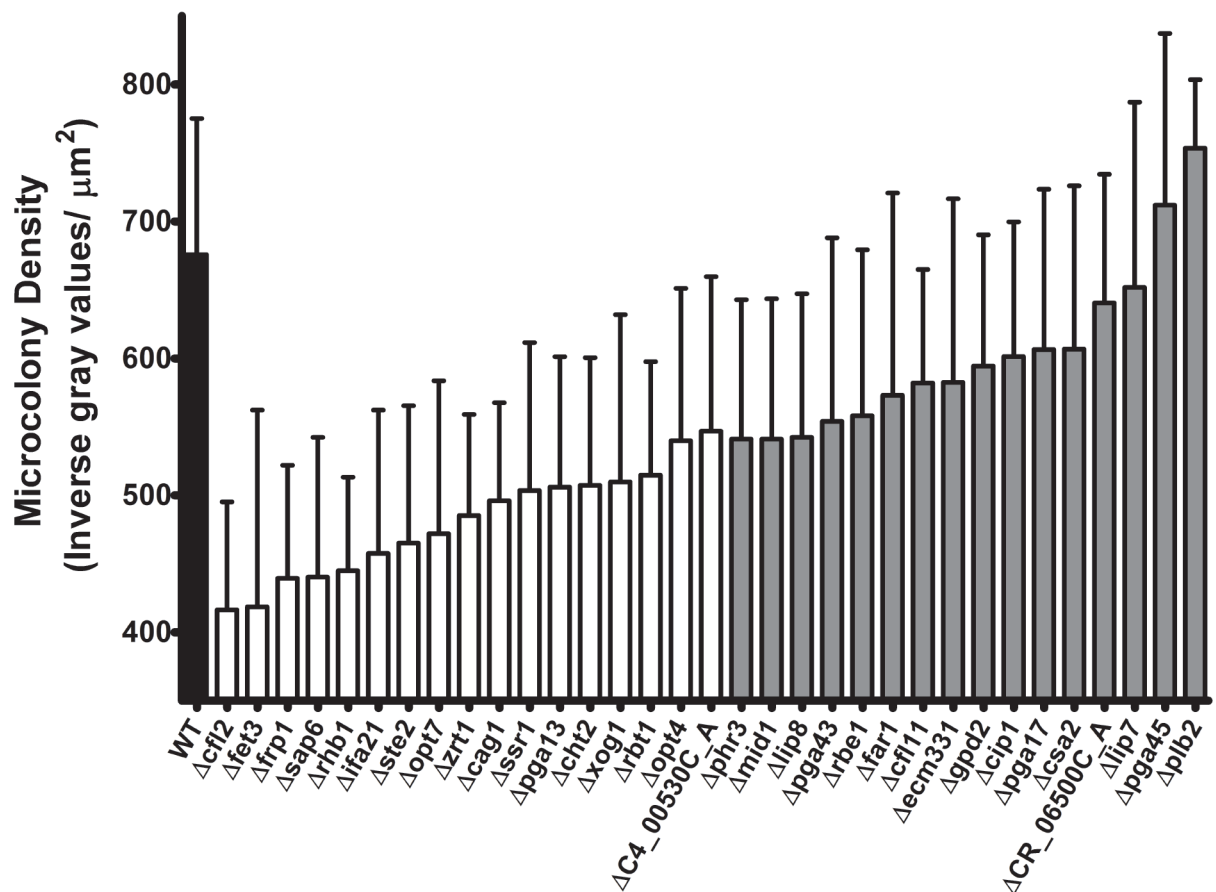

### S1 Fig. Genes affecting microcolony formation.

(A) Homozygous knockout mutants and wild-type CAI4 cells were grown under static microcolony inducing conditions (RPMI with 5%  $\text{CO}_2$ ) for 20 h, and imaged using brightfield microscopy. Images shown have significantly reduced microcolony density, except  $\Delta lip8$ . Scale bar indicates 100  $\mu\text{m}$ . (B) Microcolony density per square micron was evaluated using ImageJ. Data are means  $\pm$  SD of  $n \geq 3$  experiments, with white bars indicating significance by a post-hoc Tukey's test at  $p < 0.05$  as compared to WT.
