# Supplementary material for: Candida albicans Sfl1/Sfl2 regulatory network drives the formation of pathogenic microcolonies
Source: PubMed Central journal article supplement (PMC6173444; doi:10.1371/journal.ppat.1007316), 2018-09-25
Supplement: ppat.1007316.s004.pdf [file ppat.1007316.s004.pdf]

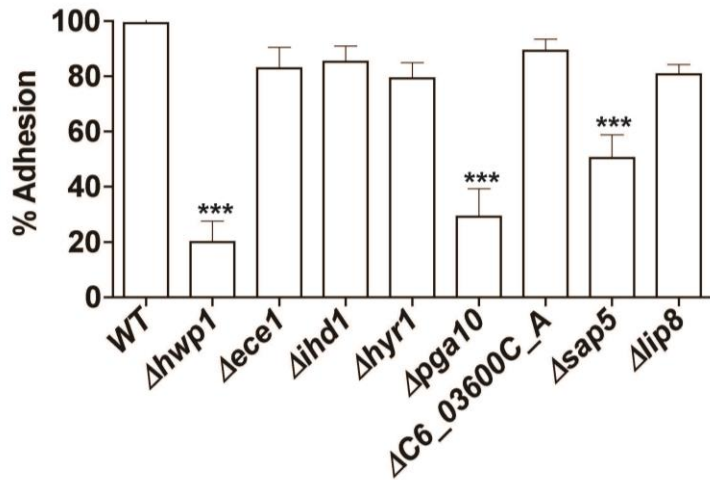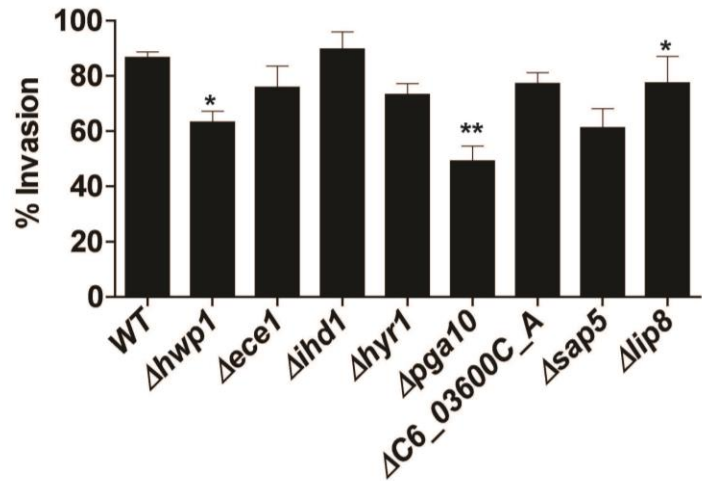

**S4 Fig. Several core microcolony genes are involved in microcolony adhesion or invasion.** *Candida albicans* knockouts of eight transcriptional regulators were quantitated for adhesion (90 min incubation) and invasion (4.5 h) on TR146 epithelial monolayers and compared to wild-type CA14 cells. For adhesion and invasion, non-adherent *C. albicans* cells were removed by washing, and adherent cells fixed with 4% formaldehyde. For invasion, epithelial cells were also permeabilized and adherent *Candida* cells were stained with anti-*Candida* antibody and Alexa Fluor 488. Asterisks indicate statistically significant differences compared to WT cells, \*  $p < 0.05$ , \*\*  $p < 0.01$ , \*\*\*  $p < 0.001$ . ND: No data.
