# Supplementary material for: Candida albicans Sfl1/Sfl2 regulatory network drives the formation of pathogenic microcolonies
Source: PLoS Pathog. 2018 Sep 25;14(9):e1007316. doi: 10.1371/journal.ppat.1007316 (PMC6173444; doi:10.1371/journal.ppat.1007316)
Supplement: S1 Table — (A) RNA-seq transcriptomic data of C. albicans microcolonies grown at 37°C under flow as compared to cells grown at 37°C statically (B) RNA-seq transcriptomic data of C. albicans microcolonies grown at 37°C under flow as compared to cells grown at 23°C under flow (XLSX) [file ppat.1007316.s005.xlsx]

## Sheet: S Table 1 Legends
S1 Table A. RNA-seq transcriptomic data of C. albicans microcolonies grown at 37°C under flow as compared to cells grown at 37°C statically
S1 Table B. RNA-seq transcriptomic data of C. albicans microcolonies grown at 37°C under flow as compared to cells grown at 23°C under flow

## Sheet: A. Flow Data,37C Flow v Static
test_id	gene_id	Gene ID with Link	Gene Name	locus	sample_1	sample_2	status	value_1	value_2	log2(fold change)	test_stat	p_value	q_value	significant
C1_03580W_A	C1_03580W_A	C1_03580W_A	C1_03580W_A	Ca22chr1A_C_albicans_SC5314:749094-749193	37Control	37	OK	44.0852	0	#NAME?	#NAME?	0.0103	0.0845687	no
C1_06330W_A	C1_06330W_A	C1_06330W_A	C1_06330W_A	Ca22chr1A_C_albicans_SC5314:1340303-1340657	37Control	37	NOTEST	0.135546	0	#NAME?	0	1	1	no
C1_07310C_A	C1_07310C_A	C1_07310C_A	tL%28AAG%292	Ca22chr1A_C_albicans_SC5314:1569971-1570092	37Control	37	OK	15.5218	0	#NAME?	#NAME?	0.10705	0.357371	no
C2_00040C_A	C2_00040C_A	C2_00040C_A	tV%28CAC%291	Ca22chr2A_C_albicans_SC5314:7395-7467	37Control	37	NOTEST	14.9624	0	#NAME?	0	1	1	no
C2_02640C_A	C2_02640C_A	C2_02640C_A	C2_02640C_A	Ca22chr2A_C_albicans_SC5314:532051-533413	37Control	37	NOTEST	0.00402848	0	#NAME?	0	1	1	no
C2_03660W_A	C2_03660W_A	C2_03660W_A	tE%28CUC%291	Ca22chr2A_C_albicans_SC5314:771702-771774	37Control	37	OK	389.037	0	#NAME?	#NAME?	0.0065	0.0629771	no
C2_09540W_A	C2_09540W_A	C2_09540W_A	C2_09540W_A	Ca22chr2A_C_albicans_SC5314:1953453-1953601	37Control	37	OK	2.23242	0	#NAME?	#NAME?	0.05555	0.239096	no
C3_01240C_A	C3_01240C_A	C3_01240C_A	tR%28CCU%291	Ca22chr3A_C_albicans_SC5314:261804-261893	37Control	37	OK	35.5374	0	#NAME?	#NAME?	0.10705	0.357371	no
C3_02890C_A	C3_02890C_A	C3_02890C_A	C3_02890C_A	Ca22chr3A_C_albicans_SC5314:622286-622697	37Control	37	NOTEST	0.0267714	0	#NAME?	0	1	1	no
C3_02990C_A	C3_02990C_A	C3_02990C_A	C3_02990C_A	Ca22chr3A_C_albicans_SC5314:636944-638042	37Control	37	NOTEST	0.00619698	0	#NAME?	0	1	1	no
C3_05490C_A	C3_05490C_A	C3_05490C_A	tV%28AAC%296	Ca22chr3A_C_albicans_SC5314:1232580-1232654	37Control	37	OK	67.6634	0	#NAME?	#NAME?	0.0434	0.206476	no
C4_06520W_A	C4_06520W_A	C4_06520W_A	C4_06520W_A	Ca22chr4A_C_albicans_SC5314:1449259-1449321	37Control	37	OK	92.5377	0	#NAME?	#NAME?	0.11725	0.377634	no
C5_00990W_A	C5_00990W_A	C5_00990W_A	tQ%28CUG%291	Ca22chr5A_C_albicans_SC5314:220200-220272	37Control	37	OK	172.075	0	#NAME?	#NAME?	0.0223	0.137396	no
C7_00540W_A	C7_00540W_A	C7_00540W_A	C7_00540W_A	Ca22chr7A_C_albicans_SC5314:88270-88384	37Control	37	OK	20.7886	0	#NAME?	#NAME?	0.00445	0.0500094	no
CM_00350W	CM_00350W	CM_00350W	tM%28CAU%295mt	Ca22chrM_C_albicans_SC5314:26934-27005	37Control	37	NOTEST	16.3924	0	#NAME?	0	1	1	no
CM_00430W	CM_00430W	CM_00430W	tL%28UAG%291mt	Ca22chrM_C_albicans_SC5314:32014-32088	37Control	37	NOTEST	12.5883	0	#NAME?	0	1	1	no
CR_02080W_A	CR_02080W_A	CR_02080W_A	tL%28AAG%291	Ca22chrRA_C_albicans_SC5314:456550-456671	37Control	37	OK	132.342	0	#NAME?	#NAME?	0.0114	0.0905223	no
CR_03580C_A	CR_03580C_A	CR_03580C_A	CR_03580C_A	Ca22chrRA_C_albicans_SC5314:791586-792717	37Control	37	NOTEST	0.00597634	0	#NAME?	0	1	1	no
CR_05590C_A	CR_05590C_A	CR_05590C_A	tC%28GCA%292	Ca22chrRA_C_albicans_SC5314:1190765-1190860	37Control	37	NOTEST	16.273	0	#NAME?	0	1	1	no
CR_07990C_A	CR_07990C_A	CR_07990C_A	CR_07990C_A	Ca22chrRA_C_albicans_SC5314:1748631-1749009	37Control	37	OK	0.249472	0	#NAME?	#NAME?	0.02545	0.149145	no
C6_00220C_A	C6_00220C_A	C6_00220C_A	C6_00220C_A	Ca22chr6A_C_albicans_SC5314:24671-24754	37Control	37	OK	142.961	0	−inf	#NAME?	0.00075	0.0168772	yes
CR_03320C_A	CR_03320C_A	CR_03320C_A	CR_03320C_A	Ca22chrRA_C_albicans_SC5314:742229-743781	37Control	37	OK	4.31913	0	−inf	#NAME?	0.0025	0.0350353	yes
CR_08220C_A	CR_08220C_A	CR_08220C_A	tK%28UUU%293	Ca22chrRA_C_albicans_SC5314:1786875-1786961	37Control	37	OK	640.774	0	−inf	#NAME?	5e-05	0.00298022	yes
C3_01350C_A	C3_01350C_A	C3_01350C_A	URA3	Ca22chr3A_C_albicans_SC5314:290230-291043	37Control	37	OK	0	58.6844	inf	#NAME?	5e-05	0.00298022	yes
C3_01050C_A	C3_01050C_A	C3_01050C_A	C3_01050C_A	Ca22chr3A_C_albicans_SC5314:213597-215352	37Control	37	OK	0	1.07558	inf	#NAME?	0.22315	0.552376	no
C3_06380W_A	C3_06380W_A	C3_06380W_A	NSA2	Ca22chr3A_C_albicans_SC5314:1456913-1457699	37Control	37	NOTEST	0	3.07766e-07	inf	0	1	1	no
C3_06390W_A	C3_06390W_A	C3_06390W_A	C3_06390W_A	Ca22chr3A_C_albicans_SC5314:1456913-1457699	37Control	37	NOTEST	0	0.0296725	inf	0	1	1	no
C5_03700C_A	C5_03700C_A	C5_03700C_A	C5_03700C_A	Ca22chr5A_C_albicans_SC5314:821295-822195	37Control	37	NOTEST	0	0.0189547	inf	0	1	1	no
C7_01560C_A	C7_01560C_A	C7_01560C_A	NUP	Ca22chr7A_C_albicans_SC5314:336676-337897	37Control	37	OK	1.83058	82.5107	5.49421	4.78743	5e-05	0.00298022	yes
C1_05960W_A	C1_05960W_A	C1_05960W_A	PGA45	Ca22chr1A_C_albicans_SC5314:1251549-1252941	37Control	37	OK	7.87274	290.56	5.20583	3.33824	0.0018	0.0286827	yes
C6_02010C_A	C6_02010C_A	C6_02010C_A	GPD2	Ca22chr6A_C_albicans_SC5314:411488-412604	37Control	37	OK	44.497	1476.81	5.05263	4.19206	5e-05	0.00298022	yes
C4_03570W_A	C4_03570W_A	C4_03570W_A	HWP1	Ca22chr4A_C_albicans_SC5314:762834-764739	37Control	37	OK	17.2261	561.961	5.0278	4.39528	5e-05	0.00298022	yes
C4_03470C_A	C4_03470C_A	C4_03470C_A	ECE1	Ca22chr4A_C_albicans_SC5314:726513-727329	37Control	37	OK	24.669	791.143	5.00316	4.32078	5e-05	0.00298022	yes
C6_03850C_A	C6_03850C_A	C6_03850C_A	IHD1	Ca22chr6A_C_albicans_SC5314:838280-839459	37Control	37	OK	16.5581	509.911	4.94464	4.36115	5e-05	0.00298022	yes
C6_00960W_A	C6_00960W_A	C6_00960W_A	CAN1	Ca22chr6A_C_albicans_SC5314:191050-192766	37Control	37	OK	15.7151	409.515	4.70369	4.36614	5e-05	0.00298022	yes
C6_01990W_A	C6_01990W_A	C6_01990W_A	PLB1	Ca22chr6A_C_albicans_SC5314:405912-407730	37Control	37	OK	1.40794	29.1074	4.36972	3.92414	5e-05	0.00298022	yes
C2_06970W_A	C2_06970W_A	C2_06970W_A	AAH1	Ca22chr2A_C_albicans_SC5314:1429226-1430270	37Control	37	OK	10.0855	149.443	3.88924	4.27701	5e-05	0.00298022	yes
C2_01970C_A	C2_01970C_A	C2_01970C_A	ROD1	Ca22chr2A_C_albicans_SC5314:369819-372591	37Control	37	OK	3.36998	45.7642	3.76341	4.1468	5e-05	0.00298022	yes
C5_04130C_A	C5_04130C_A	C5_04130C_A	CHT2	Ca22chr5A_C_albicans_SC5314:919759-921511	37Control	37	OK	17.6574	214.679	3.60384	3.31303	0.0004	0.0115199	yes
C1_01510W_A	C1_01510W_A	C1_01510W_A	C1_01510W_A	Ca22chr1A_C_albicans_SC5314:299613-301767	37Control	37	OK	3.81296	44.6153	3.54856	3.94472	5e-05	0.00298022	yes
C3_00320W_A	C3_00320W_A	C3_00320W_A	RHR2	Ca22chr3A_C_albicans_SC5314:45114-45879	37Control	37	OK	291.464	3143.08	3.43079	2.97254	0.001	0.0199735	yes
C4_06120W_A	C4_06120W_A	C4_06120W_A	GDH3	Ca22chr4A_C_albicans_SC5314:1362405-1363776	37Control	37	OK	103.246	1005.22	3.28336	2.77101	0.00055	0.0138308	yes
C1_13450W_A	C1_13450W_A	C1_13450W_A	HYR1	Ca22chr1A_C_albicans_SC5314:2944586-2947346	37Control	37	OK	11.3335	102.122	3.17162	2.93009	0.00095	0.0194281	yes
C6_01060C_A	C6_01060C_A	C6_01060C_A	CAN2	Ca22chr6A_C_albicans_SC5314:205993-207700	37Control	37	OK	33.1649	294.806	3.15204	3.29393	5e-05	0.00298022	yes
C6_01110W_A	C6_01110W_A	C6_01110W_A	FAD2	Ca22chr6A_C_albicans_SC5314:218196-219507	37Control	37	OK	60.8572	531.942	3.12777	3.2344	0.0002	0.0075491	yes
C1_12790C_A	C1_12790C_A	C1_12790C_A	FEN1	Ca22chr1A_C_albicans_SC5314:2787010-2788024	37Control	37	OK	26.0726	220.344	3.07915	2.68315	0.00245	0.0345402	yes
C4_00450C_A	C4_00450C_A	C4_00450C_A	PGA10	Ca22chr4A_C_albicans_SC5314:72787-73540	37Control	37	OK	53.6793	452.954	3.07693	2.68928	0.0008	0.01746	yes
C2_10240W_A	C2_10240W_A	C2_10240W_A	GPD1	Ca22chr2A_C_albicans_SC5314:2107702-2108914	37Control	37	OK	19.7369	165.864	3.07104	3.58183	5e-05	0.00298022	yes
C3_02310W_A	C3_02310W_A	C3_02310W_A	MEP1	Ca22chr3A_C_albicans_SC5314:504689-506297	37Control	37	OK	17.6087	147.814	3.06942	3.41862	5e-05	0.00298022	yes
C1_14120C_A	C1_14120C_A	C1_14120C_A	RBE1	Ca22chr1A_C_albicans_SC5314:3108040-3108856	37Control	37	OK	10.5332	87.8565	3.06021	3.06833	0.0001	0.00476835	yes
C2_08050C_A	C2_08050C_A	C2_08050C_A	SIT1	Ca22chr2A_C_albicans_SC5314:1634397-1636212	37Control	37	OK	6.73958	55.8917	3.0519	3.27506	5e-05	0.00298022	yes
C1_11870W_A	C1_11870W_A	C1_11870W_A	MUP1	Ca22chr1A_C_albicans_SC5314:2600114-2601776	37Control	37	OK	72.7182	598.18	3.04019	2.77525	0.0022	0.0322216	yes
C3_03360W_A	C3_03360W_A	C3_03360W_A	FCY2	Ca22chr3A_C_albicans_SC5314:704144-705725	37Control	37	OK	5.52809	44.7858	3.01819	3.12955	0.0002	0.0075491	yes
C1_05950C_A	C1_05950C_A	C1_05950C_A	C1_05950C_A	Ca22chr1A_C_albicans_SC5314:1248212-1249460	37Control	37	OK	16.9796	135.054	2.99166	3.01322	0.0002	0.0075491	yes
C5_01070C_A	C5_01070C_A	C5_01070C_A	C5_01070C_A	Ca22chr5A_C_albicans_SC5314:225951-227454	37Control	37	OK	16.1224	126.232	2.96894	3.01468	0.0002	0.0075491	yes
C7_03310W_A	C7_03310W_A	C7_03310W_A	C7_03310W_A	Ca22chr7A_C_albicans_SC5314:731778-732447	37Control	37	OK	25.1892	186.845	2.89097	2.82496	0.00015	0.00627833	yes
C6_03600C_A	C6_03600C_A	C6_03600C_A	C6_03600C_A	Ca22chr6A_C_albicans_SC5314:763187-764768	37Control	37	OK	1.2175	9.00707	2.88714	2.53425	0.00055	0.0138308	yes
C6_01540C_A	C6_01540C_A	C6_01540C_A	C6_01540C_A	Ca22chr6A_C_albicans_SC5314:310349-310526	37Control	37	OK	54.9468	390.339	2.82862	0.589574	0.40035	0.748484	no
C3_02150C_A	C3_02150C_A	C3_02150C_A	ERG6	Ca22chr3A_C_albicans_SC5314:464994-466125	37Control	37	OK	40.6247	286.585	2.81853	3.11952	5e-05	0.00298022	yes
C1_11550W_A	C1_11550W_A	C1_11550W_A	GAR1	Ca22chr1A_C_albicans_SC5314:2538442-2539003	37Control	37	OK	126.691	888.149	2.80949	2.83253	0.00115	0.0218129	yes
C4_04100C_A	C4_04100C_A	C4_04100C_A	ECM1	Ca22chr4A_C_albicans_SC5314:878812-879406	37Control	37	OK	30.4733	213.049	2.80556	3.28453	5e-05	0.00298022	yes
C6_03030W_A	C6_03030W_A	C6_03030W_A	SAP5	Ca22chr6A_C_albicans_SC5314:635172-636429	37Control	37	OK	14.6157	101.829	2.80056	2.80431	0.00025	0.00863991	yes
C6_03790C_A	C6_03790C_A	C6_03790C_A	HGT10	Ca22chr6A_C_albicans_SC5314:817348-818989	37Control	37	OK	8.54743	57.8684	2.75921	3.22905	5e-05	0.00298022	yes
C2_05460W_A	C2_05460W_A	C2_05460W_A	CDC19	Ca22chr2A_C_albicans_SC5314:1118611-1120126	37Control	37	OK	950.428	6397.79	2.75093	1.96054	0.0082	0.0726809	no
C1_00160C_A	C1_00160C_A	C1_00160C_A	C1_00160C_A	Ca22chr1A_C_albicans_SC5314:28285-29488	37Control	37	OK	140.794	933.666	2.72932	2.6743	0.00025	0.00863991	yes
C2_06020W_A	C2_06020W_A	C2_06020W_A	CNT	Ca22chr2A_C_albicans_SC5314:1232701-1234528	37Control	37	OK	71.5347	473.559	2.72683	2.48348	0.0027	0.0369314	yes
C3_01270W_A	C3_01270W_A	C3_01270W_A	C3_01270W_A	Ca22chr3A_C_albicans_SC5314:273810-274278	37Control	37	OK	7.70269	50.798	2.72134	2.20428	0.0088	0.0759963	no
C4_06720W_A	C4_06720W_A	C4_06720W_A	NOP1	Ca22chr4A_C_albicans_SC5314:1497788-1498739	37Control	37	OK	136.876	898.346	2.7144	2.76906	0.00035	0.0107191	yes
C2_00680C_A	C2_00680C_A	C2_00680C_A	SOD5	Ca22chr2A_C_albicans_SC5314:111313-112000	37Control	37	OK	7.30656	46.835	2.68032	2.61436	0.00155	0.0258814	yes
C4_02370C_A	C4_02370C_A	C4_02370C_A	PGA59	Ca22chr4A_C_albicans_SC5314:471020-471362	37Control	37	OK	3419.35	21743.7	2.6688	2.13815	0.0045	0.0504209	no
C3_01540W_A	C3_01540W_A	C3_01540W_A	C3_01540W_A	Ca22chr3A_C_albicans_SC5314:335764-336352	37Control	37	OK	320.113	2034.64	2.66812	1.90956	0.02685	0.154042	no
C4_04770C_A	C4_04770C_A	C4_04770C_A	MNN22	Ca22chr4A_C_albicans_SC5314:1018784-1020554	37Control	37	OK	10.4678	66.2549	2.66207	3.16156	5e-05	0.00298022	yes
C2_05750W_A	C2_05750W_A	C2_05750W_A	C2_05750W_A	Ca22chr2A_C_albicans_SC5314:1174514-1175765	37Control	37	OK	22.9226	145.034	2.66155	3.11585	5e-05	0.00298022	yes
C1_12440W_A	C1_12440W_A	C1_12440W_A	C1_12440W_A	Ca22chr1A_C_albicans_SC5314:2707765-2708623	37Control	37	OK	10.5044	66.3009	2.65804	3.02911	0.0001	0.00476835	yes
C1_05760C_A	C1_05760C_A	C1_05760C_A	PGA26	Ca22chr1A_C_albicans_SC5314:1204127-1204523	37Control	37	OK	2.30071	14.4149	2.64741	1.95893	0.01515	0.108375	no
C5_03050C_A	C5_03050C_A	C5_03050C_A	PGA58	Ca22chr5A_C_albicans_SC5314:676464-677187	37Control	37	OK	1.5659	9.65122	2.62372	2.04103	0.0109	0.0879612	no
CR_06660W_A	CR_06660W_A	CR_06660W_A	SEO1	Ca22chrRA_C_albicans_SC5314:1429409-1431239	37Control	37	OK	11.7589	72.1281	2.61681	2.9043	0.0002	0.0075491	yes
C3_01560W_A	C3_01560W_A	C3_01560W_A	C3_01560W_A	Ca22chr3A_C_albicans_SC5314:342572-344876	37Control	37	OK	14.0336	85.8263	2.61254	3.14707	5e-05	0.00298022	yes
C1_07890C_A	C1_07890C_A	C1_07890C_A	ADE5%2C7	Ca22chr1A_C_albicans_SC5314:1718491-1720900	37Control	37	OK	35.8146	217.899	2.60504	2.30145	0.00945	0.0796023	no
C3_04510W_A	C3_04510W_A	C3_04510W_A	C3_04510W_A	Ca22chr3A_C_albicans_SC5314:942850-943153	37Control	37	OK	156.292	947.566	2.59998	2.9651	0.00015	0.00627833	yes
C1_11070W_A	C1_11070W_A	C1_11070W_A	PET127	Ca22chr1A_C_albicans_SC5314:2438056-2440174	37Control	37	OK	10.2058	61.6834	2.59549	3.08869	0.00015	0.00627833	yes
C2_08590W_A	C2_08590W_A	C2_08590W_A	YWP1	Ca22chr2A_C_albicans_SC5314:1746838-1748440	37Control	37	OK	71.7044	432.365	2.59212	2.24696	0.00495	0.0534901	no
C1_09330W_A	C1_09330W_A	C1_09330W_A	C1_09330W_A	Ca22chr1A_C_albicans_SC5314:2054911-2055511	37Control	37	OK	22.9079	137.471	2.58521	2.89749	0.00045	0.012446	yes
CR_09370W_A	CR_09370W_A	CR_09370W_A	ELF1	Ca22chrRA_C_albicans_SC5314:1985043-1988631	37Control	37	OK	22.6381	134.714	2.57308	2.66181	0.00045	0.012446	yes
CR_01510C_A	CR_01510C_A	CR_01510C_A	CR_01510C_A	Ca22chrRA_C_albicans_SC5314:349037-349379	37Control	37	OK	0.52671	3.11408	2.56372	1.37756	0.1037	0.350599	no
C7_01250W_A	C7_01250W_A	C7_01250W_A	ASC1	Ca22chr7A_C_albicans_SC5314:257911-259124	37Control	37	OK	584.403	3434.07	2.55488	2.01781	0.00775	0.0703137	no
C1_02450C_A	C1_02450C_A	C1_02450C_A	C1_02450C_A	Ca22chr1A_C_albicans_SC5314:520055-520586	37Control	37	OK	51.7652	301.21	2.54072	2.88812	0.00015	0.00627833	yes
C1_13730C_A	C1_13730C_A	C1_13730C_A	DIM1	Ca22chr1A_C_albicans_SC5314:3015897-3016878	37Control	37	OK	20.962	119.557	2.51185	2.98029	0.00015	0.00627833	yes
C7_01000C_A	C7_01000C_A	C7_01000C_A	C7_01000C_A	Ca22chr7A_C_albicans_SC5314:211800-212739	37Control	37	OK	1086.93	6176.8	2.50661	1.23955	0.23215	0.564199	no
C1_03010W_A	C1_03010W_A	C1_03010W_A	RPP1A	Ca22chr1A_C_albicans_SC5314:630192-630513	37Control	37	OK	1482.49	8409.17	2.50394	2.25021	0.0074	0.0684573	no
C2_01430W_A	C2_01430W_A	C2_01430W_A	APT1	Ca22chr2A_C_albicans_SC5314:256699-257266	37Control	37	OK	106.784	604.753	2.50165	2.60848	0.00135	0.0240106	yes
C2_03940C_A	C2_03940C_A	C2_03940C_A	SCH9	Ca22chr2A_C_albicans_SC5314:825400-827764	37Control	37	OK	6.68535	37.7029	2.4956	2.96364	0.00015	0.00627833	yes
C7_03920C_A	C7_03920C_A	C7_03920C_A	RPP1B	Ca22chr7A_C_albicans_SC5314:861406-861733	37Control	37	OK	1084.77	6113.4	2.49459	2.29327	0.0058	0.0588594	no
C1_09430W_A	C1_09430W_A	C1_09430W_A	C1_09430W_A	Ca22chr1A_C_albicans_SC5314:2077582-2080183	37Control	37	OK	8.38692	46.8168	2.48081	3.05181	0.0001	0.00476835	yes
C3_05240C_A	C3_05240C_A	C3_05240C_A	RPL8B	Ca22chr3A_C_albicans_SC5314:1153145-1153934	37Control	37	OK	593.434	3310.7	2.47998	2.03203	0.0044	0.0496847	yes
C4_05730W_A	C4_05730W_A	C4_05730W_A	C4_05730W_A	Ca22chr4A_C_albicans_SC5314:1263840-1264554	37Control	37	OK	6.44282	35.927	2.4793	2.32531	0.00195	0.0301051	yes
C2_04120C_A	C2_04120C_A	C2_04120C_A	C2_04120C_A	Ca22chr2A_C_albicans_SC5314:868106-869474	37Control	37	OK	27.1613	151.034	2.47525	2.97976	0.0001	0.00476835	yes
C2_07960C_A	C2_07960C_A	C2_07960C_A	NSA1	Ca22chr2A_C_albicans_SC5314:1617395-1619652	37Control	37	OK	24.9937	138.732	2.47266	1.51785	0.23195	0.563908	no
C7_00990W_A	C7_00990W_A	C7_00990W_A	RPP0	Ca22chr7A_C_albicans_SC5314:211800-212739	37Control	37	OK	462.039	2557.12	2.46843	1.49399	0.02565	0.149618	no
C7_03540C_A	C7_03540C_A	C7_03540C_A	ENP2	Ca22chr7A_C_albicans_SC5314:781558-783811	37Control	37	OK	12.4624	68.8729	2.46635	2.92492	0.00015	0.00627833	yes
C3_05580C_A	C3_05580C_A	C3_05580C_A	GAP2	Ca22chr3A_C_albicans_SC5314:1246779-1248546	37Control	37	OK	16.9683	93.3827	2.46031	2.77134	0.00025	0.00863991	yes
CR_01410C_A	CR_01410C_A	CR_01410C_A	CR_01410C_A	Ca22chrRA_C_albicans_SC5314:333192-334479	37Control	37	OK	13.1176	71.8518	2.45352	2.91926	0.00015	0.00627833	yes
C1_08410C_A	C1_08410C_A	C1_08410C_A	SAM4	Ca22chr1A_C_albicans_SC5314:1850367-1851303	37Control	37	OK	96.5157	527.709	2.45091	2.53925	0.00175	0.028172	yes
C6_01170W_A	C6_01170W_A	C6_01170W_A	CIC1	Ca22chr6A_C_albicans_SC5314:228066-229164	37Control	37	OK	26.1005	142.355	2.44735	2.98459	5e-05	0.00298022	yes
C6_00950C_A	C6_00950C_A	C6_00950C_A	TOP1	Ca22chr6A_C_albicans_SC5314:186530-188873	37Control	37	OK	15.7927	85.5965	2.43829	2.75297	0.00055	0.0138308	yes
C4_04720W_A	C4_04720W_A	C4_04720W_A	C4_04720W_A	Ca22chr4A_C_albicans_SC5314:1011676-1012648	37Control	37	OK	34.5811	185.631	2.42439	2.65447	0.0004	0.0115199	yes
CR_04160C_A	CR_04160C_A	CR_04160C_A	CR_04160C_A	Ca22chrRA_C_albicans_SC5314:930967-932329	37Control	37	OK	17.1914	92.0397	2.42057	2.99079	5e-05	0.00298022	yes
C7_01570C_A	C7_01570C_A	C7_01570C_A	C7_01570C_A	Ca22chr7A_C_albicans_SC5314:338746-339883	37Control	37	OK	7.33127	39.1807	2.41801	2.71898	0.00055	0.0138308	yes
C2_03120W_A	C2_03120W_A	C2_03120W_A	AMO1	Ca22chr2A_C_albicans_SC5314:630695-632825	37Control	37	OK	4.12509	21.9369	2.41086	2.42874	0.0011	0.0211629	yes
C6_00090W_A	C6_00090W_A	C6_00090W_A	C6_00090W_A	Ca22chr6A_C_albicans_SC5314:11579-11948	37Control	37	OK	53.0889	282.194	2.4102	2.65498	0.0009	0.0186691	yes
C7_04090C_A	C7_04090C_A	C7_04090C_A	C7_04090C_A	Ca22chr7A_C_albicans_SC5314:887241-888585	37Control	37	OK	21.9935	116.048	2.39957	2.94605	0.0001	0.00476835	yes
C1_03230C_A	C1_03230C_A	C1_03230C_A	ARX1	Ca22chr1A_C_albicans_SC5314:677395-679090	37Control	37	OK	41.8916	220.648	2.39701	2.69731	0.0005	0.0131346	yes
C6_01890C_A	C6_01890C_A	C6_01890C_A	C6_01890C_A	Ca22chr6A_C_albicans_SC5314:390048-391773	37Control	37	OK	25.0962	131.802	2.39283	2.81809	0.00015	0.00627833	yes
CR_04110W_A	CR_04110W_A	CR_04110W_A	CR_04110W_A	Ca22chrRA_C_albicans_SC5314:921802-923548	37Control	37	OK	12.5558	65.9404	2.39281	2.79953	0.0001	0.00476835	yes
C1_04040C_A	C1_04040C_A	C1_04040C_A	C1_04040C_A	Ca22chr1A_C_albicans_SC5314:848807-850970	37Control	37	OK	18.109	94.3033	2.3806	2.83245	0.0001	0.00476835	yes
C1_09490C_A	C1_09490C_A	C1_09490C_A	GUA1	Ca22chr1A_C_albicans_SC5314:2090365-2091958	37Control	37	OK	96.3175	500.227	2.37671	2.30302	0.0008	0.01746	yes
C6_02350C_A	C6_02350C_A	C6_02350C_A	C6_02350C_A	Ca22chr6A_C_albicans_SC5314:491415-493362	37Control	37	OK	14.2054	73.7088	2.3754	2.83173	0.0004	0.0115199	yes
C7_01640W_A	C7_01640W_A	C7_01640W_A	LAT1	Ca22chr7A_C_albicans_SC5314:352677-354111	37Control	37	OK	103.81	535.585	2.36717	2.18864	0.0083	0.0733602	no
C4_01360W_A	C4_01360W_A	C4_01360W_A	PGA53	Ca22chr4A_C_albicans_SC5314:278188-278608	37Control	37	OK	260.204	1338.6	2.36301	2.40486	0.00155	0.0258814	yes
C4_02080W_A	C4_02080W_A	C4_02080W_A	C4_02080W_A	Ca22chr4A_C_albicans_SC5314:416113-417043	37Control	37	OK	4.20831	21.6029	2.35991	2.3583	0.00305	0.0399769	yes
C6_01900C_A	C6_01900C_A	C6_01900C_A	DOG1	Ca22chr6A_C_albicans_SC5314:392014-392737	37Control	37	OK	33.371	169.05	2.34079	2.49049	0.0006	0.0145444	yes
C5_03060C_A	C5_03060C_A	C5_03060C_A	TNA1	Ca22chr5A_C_albicans_SC5314:679514-681047	37Control	37	OK	3.04597	15.4126	2.33914	2.31965	0.00385	0.0463057	yes
C2_07340W_A	C2_07340W_A	C2_07340W_A	NOC4	Ca22chr2A_C_albicans_SC5314:1498449-1500138	37Control	37	OK	23.168	117.067	2.33713	2.77062	0.0001	0.00476835	yes
C1_09510W_A	C1_09510W_A	C1_09510W_A	YTM1	Ca22chr1A_C_albicans_SC5314:2093169-2094570	37Control	37	OK	31.5571	158.611	2.32945	2.83171	0.0002	0.0075491	yes
C1_02190W_A	C1_02190W_A	C1_02190W_A	ABP140	Ca22chr1A_C_albicans_SC5314:458365-460130	37Control	37	OK	13.8782	69.6063	2.32639	1.59897	0.0522	0.231229	no
CR_02530W_A	CR_02530W_A	CR_02530W_A	DBP2	Ca22chrRA_C_albicans_SC5314:561928-564680	37Control	37	OK	62.0239	310.63	2.3243	2.36772	0.00385	0.0463057	yes
C1_02080W_A	C1_02080W_A	C1_02080W_A	SET6	Ca22chr1A_C_albicans_SC5314:429370-431994	37Control	37	OK	15.44	77.1311	2.32064	2.0206	0.009	0.0769473	no
C7_00690W_A	C7_00690W_A	C7_00690W_A	NOP15	Ca22chr7A_C_albicans_SC5314:127378-128182	37Control	37	OK	67.8163	338.004	2.31733	2.79559	0.00025	0.00863991	yes
C1_12310C_A	C1_12310C_A	C1_12310C_A	CSI2	Ca22chr1A_C_albicans_SC5314:2685651-2686530	37Control	37	OK	32.4552	161.648	2.31633	2.84382	5e-05	0.00298022	yes
C1_04390C_A	C1_04390C_A	C1_04390C_A	NOP4	Ca22chr1A_C_albicans_SC5314:908569-910795	37Control	37	OK	23.5658	116.564	2.30635	2.61217	0.00105	0.0206223	yes
C4_06210C_A	C4_06210C_A	C4_06210C_A	C4_06210C_A	Ca22chr4A_C_albicans_SC5314:1386345-1387926	37Control	37	OK	48.8497	239.754	2.29513	2.56587	0.00105	0.0206223	yes
C7_01200C_A	C7_01200C_A	C7_01200C_A	DBP7	Ca22chr7A_C_albicans_SC5314:250791-252975	37Control	37	OK	14.2192	69.6893	2.2931	2.80356	5e-05	0.00298022	yes
C7_03830C_A	C7_03830C_A	C7_03830C_A	C7_03830C_A	Ca22chr7A_C_albicans_SC5314:847594-848101	37Control	37	OK	37.7185	184.533	2.29053	2.58573	0.00065	0.0153034	yes
C1_05060W_A	C1_05060W_A	C1_05060W_A	REI1	Ca22chr1A_C_albicans_SC5314:1058029-1059178	37Control	37	OK	30.3369	148.086	2.28729	2.69808	0.0006	0.0145444	yes
C6_02770W_A	C6_02770W_A	C6_02770W_A	MRT4	Ca22chr6A_C_albicans_SC5314:570238-570931	37Control	37	OK	84.0826	410.102	2.28611	2.71123	0.00035	0.0107191	yes
C1_06740C_A	C1_06740C_A	C1_06740C_A	NOP6	Ca22chr1A_C_albicans_SC5314:1441423-1442053	37Control	37	OK	44.2712	215.237	2.28149	2.68154	0.00065	0.0153034	yes
C3_02180C_A	C3_02180C_A	C3_02180C_A	C3_02180C_A	Ca22chr3A_C_albicans_SC5314:472268-473408	37Control	37	OK	33.936	164.532	2.27748	2.68931	0.0003	0.00975907	yes
C3_00090W_A	C3_00090W_A	C3_00090W_A	RPS24	Ca22chr3A_C_albicans_SC5314:15900-16308	37Control	37	OK	1874.45	9083.95	2.27685	1.88274	0.0074	0.0684573	no
C2_04350C_A	C2_04350C_A	C2_04350C_A	SUV3	Ca22chr2A_C_albicans_SC5314:908644-910807	37Control	37	OK	12.9756	62.6492	2.27149	2.69407	0.00055	0.0138308	yes
C2_01380W_A	C2_01380W_A	C2_01380W_A	PLB4.5	Ca22chr2A_C_albicans_SC5314:241110-243219	37Control	37	OK	13.0838	62.8547	2.26424	2.2926	0.0015	0.0254069	yes
C4_03720C_A	C4_03720C_A	C4_03720C_A	C4_03720C_A	Ca22chr4A_C_albicans_SC5314:792423-793434	37Control	37	OK	25.5737	122.667	2.26201	2.47557	0.0006	0.0145444	yes
C1_02990C_A	C1_02990C_A	C1_02990C_A	XOG1	Ca22chr1A_C_albicans_SC5314:622221-623538	37Control	37	OK	17.0215	81.6414	2.26194	2.76673	0.00015	0.00627833	yes
C6_02480W_A	C6_02480W_A	C6_02480W_A	C6_02480W_A	Ca22chr6A_C_albicans_SC5314:514253-515363	37Control	37	OK	23.3767	111.703	2.25652	2.48408	0.00075	0.0168772	yes
C7_03850W_A	C7_03850W_A	C7_03850W_A	C7_03850W_A	Ca22chr7A_C_albicans_SC5314:850057-852295	37Control	37	OK	10.7533	51.3406	2.25533	2.69663	0.0009	0.0186691	yes
C1_14280C_A	C1_14280C_A	C1_14280C_A	NPL3	Ca22chr1A_C_albicans_SC5314:3146580-3147441	37Control	37	OK	182.746	871.074	2.25295	2.2582	0.00185	0.0291344	yes
C1_10030W_A	C1_10030W_A	C1_10030W_A	DBP3	Ca22chr1A_C_albicans_SC5314:2196987-2198682	37Control	37	OK	27.5917	131.514	2.25291	2.71417	0.00015	0.00627833	yes
C1_03790C_A	C1_03790C_A	C1_03790C_A	C1_03790C_A	Ca22chr1A_C_albicans_SC5314:795542-796823	37Control	37	OK	86.4281	411.648	2.25184	2.30637	0.00415	0.0482204	yes
CR_09320C_A	CR_09320C_A	CR_09320C_A	PHO88	Ca22chrRA_C_albicans_SC5314:1976704-1977280	37Control	37	OK	179.448	853.294	2.24947	2.51444	0.00055	0.0138308	yes
C3_04830C_A	C3_04830C_A	C3_04830C_A	FAS2	Ca22chr3A_C_albicans_SC5314:1030625-1036280	37Control	37	OK	54.7904	260.029	2.24668	1.52291	0.0546	0.237394	no
C1_13940W_A	C1_13940W_A	C1_13940W_A	SIM1	Ca22chr1A_C_albicans_SC5314:3074019-3075138	37Control	37	OK	359.474	1703.75	2.24475	1.91136	0.0157	0.110587	no
C4_02260C_A	C4_02260C_A	C4_02260C_A	C4_02260C_A	Ca22chr4A_C_albicans_SC5314:446281-447397	37Control	37	OK	26.3667	124.821	2.24307	2.77052	5e-05	0.00298022	yes
C5_05490C_A	C5_05490C_A	C5_05490C_A	HTS1	Ca22chr5A_C_albicans_SC5314:1178287-1180902	37Control	37	OK	37.6469	177.985	2.24115	0.664793	0.19975	0.5203	no
C3_05140C_A	C3_05140C_A	C3_05140C_A	C3_05140C_A	Ca22chr3A_C_albicans_SC5314:1101305-1102724	37Control	37	OK	15.9929	75.5368	2.23974	2.76794	5e-05	0.00298022	yes
C1_01480C_A	C1_01480C_A	C1_01480C_A	RPS21	Ca22chr1A_C_albicans_SC5314:289698-290448	37Control	37	OK	1085.07	5120.13	2.23839	1.80857	0.01255	0.0962064	no
C2_03870W_A	C2_03870W_A	C2_03870W_A	GNA1	Ca22chr2A_C_albicans_SC5314:810974-811424	37Control	37	OK	43.5609	205.505	2.23807	2.62954	0.0005	0.0131346	yes
CR_09730C_A	CR_09730C_A	CR_09730C_A	SSF1	Ca22chrRA_C_albicans_SC5314:2068471-2069818	37Control	37	OK	14.888	70.1287	2.23585	2.63622	0.00055	0.0138308	yes
C2_06680W_A	C2_06680W_A	C2_06680W_A	FRP3	Ca22chr2A_C_albicans_SC5314:1365085-1365943	37Control	37	OK	29.4637	138.772	2.2357	2.62712	0.00035	0.0107191	yes
CR_05660W_A	CR_05660W_A	CR_05660W_A	SDA1	Ca22chrRA_C_albicans_SC5314:1205202-1207482	37Control	37	OK	22.8509	107.227	2.23035	2.532	0.00135	0.0240106	yes
C1_06890C_A	C1_06890C_A	C1_06890C_A	C1_06890C_A	Ca22chr1A_C_albicans_SC5314:1468464-1469275	37Control	37	OK	2006.38	9414.37	2.23027	1.86005	0.0066	0.0635212	no
C3_05160C_A	C3_05160C_A	C3_05160C_A	C3_05160C_A	Ca22chr3A_C_albicans_SC5314:1104956-1107683	37Control	37	OK	14.4436	67.5261	2.22502	2.72369	0.0004	0.0115199	yes
C4_02790C_A	C4_02790C_A	C4_02790C_A	SAS10	Ca22chr4A_C_albicans_SC5314:582402-584097	37Control	37	OK	26.8466	125.27	2.22223	2.59211	0.00025	0.00863991	yes
C2_08840W_A	C2_08840W_A	C2_08840W_A	C2_08840W_A	Ca22chr2A_C_albicans_SC5314:1794756-1795149	37Control	37	OK	67.8842	315.852	2.2181	2.69711	0.00035	0.0107191	yes
CR_04170W_A	CR_04170W_A	CR_04170W_A	CR_04170W_A	Ca22chrRA_C_albicans_SC5314:932628-934485	37Control	37	OK	41.5011	192.957	2.21706	2.48805	0.0012	0.0223119	yes
C1_14220C_A	C1_14220C_A	C1_14220C_A	FTR2	Ca22chr1A_C_albicans_SC5314:3132913-3134062	37Control	37	OK	9.23378	42.8336	2.21375	2.32771	0.00165	0.0270007	yes
CR_10410C_A	CR_10410C_A	CR_10410C_A	CR_10410C_A	Ca22chrRA_C_albicans_SC5314:2217986-2218817	37Control	37	OK	66.9352	309.834	2.21066	2.66972	0.0002	0.0075491	yes
C3_02040C_A	C3_02040C_A	C3_02040C_A	C3_02040C_A	Ca22chr3A_C_albicans_SC5314:446601-447222	37Control	37	OK	64.6656	299.325	2.21064	2.72696	0.0002	0.0075491	yes
C1_04710C_A	C1_04710C_A	C1_04710C_A	C1_04710C_A	Ca22chr1A_C_albicans_SC5314:980591-981179	37Control	37	OK	37.6586	173.864	2.20691	2.68055	0.00035	0.0107191	yes
C6_03640W_A	C6_03640W_A	C6_03640W_A	NOG2	Ca22chr6A_C_albicans_SC5314:772811-775011	37Control	37	OK	37.5144	172.624	2.20212	2.551	0.0011	0.0211629	yes
C3_02350W_A	C3_02350W_A	C3_02350W_A	C3_02350W_A	Ca22chr3A_C_albicans_SC5314:512750-514754	37Control	37	OK	23.2453	106.874	2.20089	2.65103	0.00025	0.00863991	yes
C1_13070C_A	C1_13070C_A	C1_13070C_A	FAD3	Ca22chr1A_C_albicans_SC5314:2843539-2844841	37Control	37	OK	27.2984	125.485	2.20063	2.58127	0.0005	0.0131346	yes
C4_02750W_A	C4_02750W_A	C4_02750W_A	HIT1	Ca22chr4A_C_albicans_SC5314:577302-577749	37Control	37	OK	20.6756	94.9271	2.19889	2.24001	0.004	0.0474135	yes
C3_00920W_A	C3_00920W_A	C3_00920W_A	ATO1	Ca22chr3A_C_albicans_SC5314:187452-188250	37Control	37	OK	2.23167	10.2398	2.19799	1.71008	0.0246	0.146072	no
CR_01710W_A	CR_01710W_A	CR_01710W_A	CR_01710W_A	Ca22chrRA_C_albicans_SC5314:390660-391524	37Control	37	OK	13.6438	62.5085	2.19581	2.42625	0.00245	0.0345402	yes
C7_00160C_A	C7_00160C_A	C7_00160C_A	C7_00160C_A	Ca22chr7A_C_albicans_SC5314:19887-20349	37Control	37	OK	147.181	671.639	2.1901	2.67849	0.00045	0.012446	yes
C7_03300C_A	C7_03300C_A	C7_03300C_A	LIP8	Ca22chr7A_C_albicans_SC5314:727463-728846	37Control	37	OK	5.33156	24.33	2.1901	2.25842	0.00255	0.0355772	yes
C3_01310W_A	C3_01310W_A	C3_01310W_A	C3_01310W_A	Ca22chr3A_C_albicans_SC5314:277445-280040	37Control	37	OK	7.02994	32.0502	2.18875	2.54128	0.0003	0.00975907	yes
C4_05010W_A	C4_05010W_A	C4_05010W_A	C4_05010W_A	Ca22chr4A_C_albicans_SC5314:1069559-1071119	37Control	37	OK	18.1171	82.0501	2.17915	2.72902	0.0003	0.00975907	yes
C5_03790W_A	C5_03790W_A	C5_03790W_A	GUK1	Ca22chr5A_C_albicans_SC5314:837645-838218	37Control	37	OK	62.5979	283.498	2.17915	2.68866	0.00025	0.00863991	yes
C1_06760C_A	C1_06760C_A	C1_06760C_A	C1_06760C_A	Ca22chr1A_C_albicans_SC5314:1442820-1444427	37Control	37	OK	21.5197	97.4307	2.17872	2.6689	0.0001	0.00476835	yes
C3_07300W_A	C3_07300W_A	C3_07300W_A	NOP13	Ca22chr3A_C_albicans_SC5314:1675625-1676816	37Control	37	OK	40.6646	183.981	2.17771	2.61328	0.00065	0.0153034	yes
C2_05160C_A	C2_05160C_A	C2_05160C_A	C2_05160C_A	Ca22chr2A_C_albicans_SC5314:1065175-1067179	37Control	37	OK	26.7921	120.851	2.17335	2.45961	0.0025	0.0350353	yes
C4_04920W_A	C4_04920W_A	C4_04920W_A	C4_04920W_A	Ca22chr4A_C_albicans_SC5314:1056992-1058111	37Control	37	OK	17.5057	78.5354	2.16552	2.64601	0.0004	0.0115199	yes
C2_05340C_A	C2_05340C_A	C2_05340C_A	RPC40	Ca22chr2A_C_albicans_SC5314:1097888-1098899	37Control	37	OK	51.678	231.497	2.16337	2.57318	0.0006	0.0145444	yes
C3_06760W_A	C3_06760W_A	C3_06760W_A	C3_06760W_A	Ca22chr3A_C_albicans_SC5314:1542501-1543329	37Control	37	OK	44.0495	196.195	2.15509	2.64981	0.00025	0.00863991	yes
C3_05200W_A	C3_05200W_A	C3_05200W_A	RPS19A	Ca22chr3A_C_albicans_SC5314:1130251-1131056	37Control	37	OK	1251.12	5567.3	2.15376	1.83219	0.0195	0.125868	no
C5_01540W_A	C5_01540W_A	C5_01540W_A	C5_01540W_A	Ca22chr5A_C_albicans_SC5314:342886-343875	37Control	37	OK	454.89	2020.23	2.15093	0.822095	0.53185	0.843967	no
C3_04560W_A	C3_04560W_A	C3_04560W_A	MAK21	Ca22chr3A_C_albicans_SC5314:962463-965664	37Control	37	OK	25.8328	114.523	2.14837	2.40242	0.0015	0.0254069	yes
C2_02610C_A	C2_02610C_A	C2_02610C_A	HGT20	Ca22chr2A_C_albicans_SC5314:526809-528321	37Control	37	OK	3.95107	17.4598	2.14372	2.17297	0.00295	0.0390466	yes
C6_01040C_A	C6_01040C_A	C6_01040C_A	C6_01040C_A	Ca22chr6A_C_albicans_SC5314:201649-204145	37Control	37	OK	9.56502	42.1636	2.14016	2.56931	0.00035	0.0107191	yes
C5_02550C_A	C5_02550C_A	C5_02550C_A	UTP13	Ca22chr5A_C_albicans_SC5314:568080-570480	37Control	37	OK	17.8405	78.6221	2.13978	2.58956	0.00045	0.012446	yes
C2_04570W_A	C2_04570W_A	C2_04570W_A	C2_04570W_A	Ca22chr2A_C_albicans_SC5314:956812-958096	37Control	37	OK	59.7005	262.276	2.13527	2.40631	0.00135	0.0240106	yes
C1_01030W_A	C1_01030W_A	C1_01030W_A	HMT1	Ca22chr1A_C_albicans_SC5314:205264-206284	37Control	37	OK	82.3159	360.11	2.12919	2.36339	0.00135	0.0240106	yes
C7_04190C_A	C7_04190C_A	C7_04190C_A	UTP18	Ca22chr7A_C_albicans_SC5314:902361-904020	37Control	37	OK	27.1686	118.846	2.12907	2.54259	0.00075	0.0168772	yes
CR_05520W_A	CR_05520W_A	CR_05520W_A	NOC2	Ca22chrRA_C_albicans_SC5314:1174804-1176949	37Control	37	OK	36.1476	158.048	2.12839	2.41274	0.00195	0.0301051	yes
C4_05230C_A	C4_05230C_A	C4_05230C_A	C4_05230C_A	Ca22chr4A_C_albicans_SC5314:1132117-1134427	37Control	37	OK	8.45714	36.8861	2.12484	2.62968	0.0002	0.0075491	yes
C3_04670C_A	C3_04670C_A	C3_04670C_A	RPS15	Ca22chr3A_C_albicans_SC5314:991750-992554	37Control	37	OK	2046.79	8887.29	2.11838	1.67207	0.0171	0.116695	no
CR_10240W_A	CR_10240W_A	CR_10240W_A	UTP5	Ca22chrRA_C_albicans_SC5314:2184321-2186232	37Control	37	OK	33.9735	147.347	2.11674	2.40231	0.0021	0.0313419	yes
C2_05230C_A	C2_05230C_A	C2_05230C_A	RPF2	Ca22chr2A_C_albicans_SC5314:1076053-1077037	37Control	37	OK	61.7779	267.338	2.1135	2.47697	0.00075	0.0168772	yes
C4_04530C_A	C4_04530C_A	C4_04530C_A	PHR1	Ca22chr4A_C_albicans_SC5314:970513-972160	37Control	37	OK	30.9809	133.725	2.10981	2.17868	0.0042	0.0484724	yes
CR_10470C_A	CR_10470C_A	CR_10470C_A	CR_10470C_A	Ca22chrRA_C_albicans_SC5314:2227305-2228901	37Control	37	OK	24.5909	106.096	2.10917	2.49577	0.00125	0.0229471	yes
C3_06030W_A	C3_06030W_A	C3_06030W_A	NOG1	Ca22chr3A_C_albicans_SC5314:1370185-1372108	37Control	37	OK	54.0786	233.092	2.10777	2.13719	0.00715	0.0667345	no
CR_08360C_A	CR_08360C_A	CR_08360C_A	RPP2A	Ca22chrRA_C_albicans_SC5314:1808665-1809337	37Control	37	OK	1595.63	6861.64	2.10443	1.88429	0.015	0.107834	no
C7_00700W_A	C7_00700W_A	C7_00700W_A	CYB5	Ca22chr7A_C_albicans_SC5314:129227-129608	37Control	37	OK	273.105	1171.53	2.10086	2.37726	0.0019	0.0296001	yes
C4_02830C_A	C4_02830C_A	C4_02830C_A	HCA4	Ca22chr4A_C_albicans_SC5314:586324-591091	37Control	37	OK	22.0906	94.1973	2.09225	2.40104	0.001	0.0199735	yes
C6_00370C_A	C6_00370C_A	C6_00370C_A	NOP5	Ca22chr6A_C_albicans_SC5314:64427-65978	37Control	37	OK	108.512	462.583	2.09186	2.10913	0.0052	0.0553032	no
CR_10750C_A	CR_10750C_A	CR_10750C_A	CR_10750C_A	Ca22chrRA_C_albicans_SC5314:2272777-2273182	37Control	37	OK	124.096	528.88	2.09149	2.61067	0.0007	0.016118	yes
C1_03030W_A	C1_03030W_A	C1_03030W_A	RPS16A	Ca22chr1A_C_albicans_SC5314:632082-632838	37Control	37	OK	1812.92	7721.27	2.09052	1.7559	0.01395	0.102596	no
C7_00860W_A	C7_00860W_A	C7_00860W_A	SSR1	Ca22chr7A_C_albicans_SC5314:171719-172424	37Control	37	OK	145.236	615.714	2.08386	2.32404	0.0012	0.0223119	yes
C3_05370C_A	C3_05370C_A	C3_05370C_A	YST1	Ca22chr3A_C_albicans_SC5314:1193026-1194203	37Control	37	OK	1152.23	4880.42	2.08258	1.68126	0.01615	0.112828	no
C1_03060C_A	C1_03060C_A	C1_03060C_A	TSR2	Ca22chr1A_C_albicans_SC5314:638336-638966	37Control	37	OK	58.1217	246.052	2.08181	2.59969	0.0006	0.0145444	yes
C4_04860W_A	C4_04860W_A	C4_04860W_A	C4_04860W_A	Ca22chr4A_C_albicans_SC5314:1048292-1049468	37Control	37	OK	8.59932	36.3623	2.08015	2.29104	0.00195	0.0301051	yes
C6_02690C_A	C6_02690C_A	C6_02690C_A	C6_02690C_A	Ca22chr6A_C_albicans_SC5314:553946-555881	37Control	37	OK	17.0849	72.1374	2.07803	2.44126	0.0018	0.0286827	yes
CR_04740C_A	CR_04740C_A	CR_04740C_A	ADE6	Ca22chrRA_C_albicans_SC5314:1027448-1031561	37Control	37	OK	18.0323	75.6893	2.06951	1.84384	0.02445	0.145733	no
C1_00900W_A	C1_00900W_A	C1_00900W_A	RRS1	Ca22chr1A_C_albicans_SC5314:178689-179307	37Control	37	OK	92.8207	388.779	2.06643	2.45676	0.00115	0.0218129	yes
CR_05630W_A	CR_05630W_A	CR_05630W_A	DBP8	Ca22chrRA_C_albicans_SC5314:1201080-1202403	37Control	37	OK	21.6748	90.7152	2.06533	2.57627	0.0004	0.0115199	yes
C3_02130W_A	C3_02130W_A	C3_02130W_A	UTP4	Ca22chr3A_C_albicans_SC5314:460853-463085	37Control	37	OK	24.4529	102.221	2.06361	2.45203	0.00055	0.0138308	yes
C5_04910W_A	C5_04910W_A	C5_04910W_A	C5_04910W_A	Ca22chr5A_C_albicans_SC5314:1066920-1067634	37Control	37	OK	34.7216	144.927	2.06142	2.46301	0.00135	0.0240106	yes
C5_01550C_A	C5_01550C_A	C5_01550C_A	C5_01550C_A	Ca22chr5A_C_albicans_SC5314:342886-343875	37Control	37	OK	1522.41	6354.38	2.06139	1.21134	0.1051	0.35324	no
C2_10620W_A	C2_10620W_A	C2_10620W_A	RPS4A	Ca22chr2A_C_albicans_SC5314:2189808-2190597	37Control	37	OK	717.874	2980.84	2.05392	1.60981	0.0203	0.128911	no
C1_07960W_A	C1_07960W_A	C1_07960W_A	C1_07960W_A	Ca22chr1A_C_albicans_SC5314:1730690-1731389	37Control	37	OK	23.5778	97.7362	2.05146	2.41383	0.00135	0.0240106	yes
C1_08780W_A	C1_08780W_A	C1_08780W_A	C1_08780W_A	Ca22chr1A_C_albicans_SC5314:1912019-1913675	37Control	37	OK	13.1773	54.6108	2.05113	2.40791	0.00115	0.0218129	yes
CR_06300C_A	CR_06300C_A	CR_06300C_A	FGR50	Ca22chrRA_C_albicans_SC5314:1336645-1337380	37Control	37	OK	11.4961	47.5674	2.04883	2.17635	0.00295	0.0390466	yes
C4_02050W_A	C4_02050W_A	C4_02050W_A	HGH1	Ca22chr4A_C_albicans_SC5314:410515-411604	37Control	37	OK	50.427	208.33	2.0466	2.49661	0.00085	0.0180493	yes
C3_01430W_A	C3_01430W_A	C3_01430W_A	C3_01430W_A	Ca22chr3A_C_albicans_SC5314:306713-307373	37Control	37	OK	28.7571	118.399	2.04167	2.44944	0.00075	0.0168772	yes
C2_02690W_A	C2_02690W_A	C2_02690W_A	SER2	Ca22chr2A_C_albicans_SC5314:538928-539834	37Control	37	OK	48.3358	198.419	2.03738	2.29334	0.00145	0.0248732	yes
C3_06120C_A	C3_06120C_A	C3_06120C_A	GDA1	Ca22chr3A_C_albicans_SC5314:1393713-1395513	37Control	37	OK	35.168	144.195	2.03569	2.42849	0.0006	0.0145444	yes
C1_06570W_A	C1_06570W_A	C1_06570W_A	ANT1	Ca22chr1A_C_albicans_SC5314:1407256-1408294	37Control	37	OK	17.8749	73.0745	2.03144	2.39929	0.0021	0.0313419	yes
C1_06450C_A	C1_06450C_A	C1_06450C_A	RPS14B	Ca22chr1A_C_albicans_SC5314:1375842-1376671	37Control	37	OK	2350.28	9593.64	2.02925	1.63246	0.0229	0.14013	no
C2_08550C_A	C2_08550C_A	C2_08550C_A	MSU1	Ca22chr2A_C_albicans_SC5314:1728215-1731656	37Control	37	OK	5.22266	21.2941	2.0276	2.49418	0.0008	0.01746	yes
CR_10100C_A	CR_10100C_A	CR_10100C_A	INO1	Ca22chrRA_C_albicans_SC5314:2155481-2157044	37Control	37	OK	155.579	633.745	2.02625	1.44837	0.06355	0.259645	no
C4_03250C_A	C4_03250C_A	C4_03250C_A	RHD2	Ca22chr4A_C_albicans_SC5314:679261-680179	37Control	37	OK	12.9601	52.5999	2.02098	2.26716	0.00135	0.0240106	yes
C4_02900C_A	C4_02900C_A	C4_02900C_A	CRH11	Ca22chr4A_C_albicans_SC5314:599267-600629	37Control	37	OK	48.2499	195.761	2.02049	2.15197	0.00705	0.0659974	no
C5_00310C_A	C5_00310C_A	C5_00310C_A	C5_00310C_A	Ca22chr5A_C_albicans_SC5314:53246-53780	37Control	37	OK	108.97	442.077	2.02036	2.42877	0.00115	0.0218129	yes
C1_00800C_A	C1_00800C_A	C1_00800C_A	ERG2	Ca22chr1A_C_albicans_SC5314:154632-155286	37Control	37	OK	41.2899	167.489	2.0202	2.18167	0.00355	0.0442224	yes
C1_11470C_A	C1_11470C_A	C1_11470C_A	DPP1	Ca22chr1A_C_albicans_SC5314:2517425-2518211	37Control	37	OK	10.3612	41.9116	2.01616	2.11177	0.00295	0.0390466	yes
C2_01610C_A	C2_01610C_A	C2_01610C_A	RPS26A	Ca22chr2A_C_albicans_SC5314:287834-288194	37Control	37	OK	3259.27	13179.9	2.01572	1.59943	0.02105	0.132335	no
C1_03800W_A	C1_03800W_A	C1_03800W_A	RPP1	Ca22chr1A_C_albicans_SC5314:797156-798089	37Control	37	OK	14.1009	56.9315	2.01344	2.39598	0.0008	0.01746	yes
C1_03020C_A	C1_03020C_A	C1_03020C_A	RPL13	Ca22chr1A_C_albicans_SC5314:631013-631622	37Control	37	OK	1976.62	7971.36	2.01179	1.57802	0.01715	0.116909	no
C3_05800W_A	C3_05800W_A	C3_05800W_A	C3_05800W_A	Ca22chr3A_C_albicans_SC5314:1298784-1300203	37Control	37	OK	10.8114	43.4298	2.00613	2.42943	0.00145	0.0248732	yes
CR_08490W_A	CR_08490W_A	CR_08490W_A	TSR1	Ca22chrRA_C_albicans_SC5314:1832313-1834842	37Control	37	OK	21.5095	86.3785	2.0057	2.43846	0.00095	0.0194281	yes
C2_08070C_A	C2_08070C_A	C2_08070C_A	MRS4	Ca22chr2A_C_albicans_SC5314:1638717-1639695	37Control	37	OK	28.5676	114.674	2.00509	2.51361	0.001	0.0199735	yes
C3_01300C_A	C3_01300C_A	C3_01300C_A	NCE103	Ca22chr3A_C_albicans_SC5314:275344-276449	37Control	37	OK	183.998	736.61	2.00121	1.63087	0.033	0.174545	no
C2_09660W_A	C2_09660W_A	C2_09660W_A	C2_09660W_A	Ca22chr2A_C_albicans_SC5314:1977646-1978303	37Control	37	OK	85.0676	339.969	1.99872	2.39308	0.0016	0.0264351	yes
C1_12680W_A	C1_12680W_A	C1_12680W_A	C1_12680W_A	Ca22chr1A_C_albicans_SC5314:2764630-2766184	37Control	37	OK	45.2023	180.464	1.99724	2.22492	0.0048	0.0524713	no
C3_04520C_A	C3_04520C_A	C3_04520C_A	ADE2	Ca22chr3A_C_albicans_SC5314:943415-945122	37Control	37	OK	46.155	184.247	1.99708	2.23856	0.00205	0.0310135	yes
C2_09640W_A	C2_09640W_A	C2_09640W_A	PMI1	Ca22chr2A_C_albicans_SC5314:1972393-1973719	37Control	37	OK	43.7087	174.343	1.99593	2.02625	0.0048	0.0524713	no
C6_04160C_A	C6_04160C_A	C6_04160C_A	SPB1	Ca22chr6A_C_albicans_SC5314:913550-916088	37Control	37	OK	24.08	95.8679	1.99321	2.27371	0.00375	0.045716	yes
C5_03280W_A	C5_03280W_A	C5_03280W_A	CAM1-1	Ca22chr5A_C_albicans_SC5314:742815-744072	37Control	37	OK	142.889	568.408	1.99203	1.78826	0.02455	0.146072	no
C7_04140C_A	C7_04140C_A	C7_04140C_A	C7_04140C_A	Ca22chr7A_C_albicans_SC5314:893177-893816	37Control	37	OK	65.052	258.373	1.98979	2.47911	0.0008	0.01746	yes
C1_12030W_A	C1_12030W_A	C1_12030W_A	SER33	Ca22chr1A_C_albicans_SC5314:2632862-2634254	37Control	37	OK	129.029	512.041	1.98856	1.76401	0.0275	0.156107	no
C5_03670C_A	C5_03670C_A	C5_03670C_A	C5_03670C_A	Ca22chr5A_C_albicans_SC5314:813515-814376	37Control	37	OK	15.9346	63.1535	1.9867	2.32808	0.0013	0.023476	yes
C2_03830W_A	C2_03830W_A	C2_03830W_A	C2_03830W_A	Ca22chr2A_C_albicans_SC5314:807026-808910	37Control	37	OK	17.8605	70.5142	1.98114	2.31814	0.00155	0.0258814	yes
C1_07700C_A	C1_07700C_A	C1_07700C_A	VRG4	Ca22chr1A_C_albicans_SC5314:1674154-1675270	37Control	37	OK	72.1938	284.711	1.97955	2.24479	0.0041	0.0479351	yes
CR_04710W_A	CR_04710W_A	CR_04710W_A	CR_04710W_A	Ca22chrRA_C_albicans_SC5314:1020905-1021310	37Control	37	OK	13.2048	52.071	1.97942	1.94567	0.0082	0.0726809	no
CR_08150W_A	CR_08150W_A	CR_08150W_A	RPS20	Ca22chrRA_C_albicans_SC5314:1772153-1772513	37Control	37	OK	2392.28	9422.02	1.97765	1.59487	0.0318	0.170788	no
C1_08290C_A	C1_08290C_A	C1_08290C_A	DIP2	Ca22chr1A_C_albicans_SC5314:1816299-1819245	37Control	37	OK	16.9392	66.6946	1.97721	2.41288	0.00095	0.0194281	yes
C3_02110W_A	C3_02110W_A	C3_02110W_A	RPL12	Ca22chr3A_C_albicans_SC5314:457756-458254	37Control	37	OK	2193.88	8634.27	1.97659	1.58462	0.0241	0.1447	no
C7_03590C_A	C7_03590C_A	C7_03590C_A	C7_03590C_A	Ca22chr7A_C_albicans_SC5314:796797-798657	37Control	37	OK	23.3374	91.8261	1.97626	2.19092	0.00365	0.0449626	yes
C2_08000C_A	C2_08000C_A	C2_08000C_A	KRE30	Ca22chr2A_C_albicans_SC5314:1621749-1623579	37Control	37	OK	97.2336	382.404	1.97557	1.99664	0.0089	0.0764394	no
C3_05280C_A	C3_05280C_A	C3_05280C_A	C3_05280C_A	Ca22chr3A_C_albicans_SC5314:1161510-1162572	37Control	37	OK	34.135	134.171	1.97475	2.1982	0.00385	0.0463057	yes
C3_01490W_A	C3_01490W_A	C3_01490W_A	RPS7A	Ca22chr3A_C_albicans_SC5314:317329-317890	37Control	37	OK	1296.49	5095.41	1.97459	1.60825	0.0289	0.160997	no
C6_02360W_A	C6_02360W_A	C6_02360W_A	NIP7	Ca22chr6A_C_albicans_SC5314:493516-494062	37Control	37	OK	88.1926	345.482	1.96988	2.45104	0.0009	0.0186691	yes
C5_00660C_A	C5_00660C_A	C5_00660C_A	ERG11	Ca22chr5A_C_albicans_SC5314:148114-149701	37Control	37	OK	95.8837	375.184	1.96824	1.76287	0.0168	0.115738	no
CR_06720W_A	CR_06720W_A	CR_06720W_A	NMD3	Ca22chrRA_C_albicans_SC5314:1443566-1445129	37Control	37	OK	49.5434	193.83	1.96803	2.23212	0.00365	0.0449626	yes
C1_14130W_A	C1_14130W_A	C1_14130W_A	FTR1	Ca22chr1A_C_albicans_SC5314:3113600-3114746	37Control	37	OK	131.375	513.621	1.96702	1.69659	0.0132	0.0993296	no
C3_01290W_A	C3_01290W_A	C3_01290W_A	C3_01290W_A	Ca22chr3A_C_albicans_SC5314:275344-276449	37Control	37	OK	8.21768	32.0465	1.96336	0.223882	0.27005	0.61186	no
C1_09040C_A	C1_09040C_A	C1_09040C_A	C1_09040C_A	Ca22chr1A_C_albicans_SC5314:1967482-1968947	37Control	37	OK	17.849	69.5811	1.96285	2.42021	0.001	0.0199735	yes
C1_09710C_A	C1_09710C_A	C1_09710C_A	C1_09710C_A	Ca22chr1A_C_albicans_SC5314:2134880-2136464	37Control	37	OK	29.417	114.64	1.96239	2.40878	0.0014	0.0245065	yes
C6_02390W_A	C6_02390W_A	C6_02390W_A	C6_02390W_A	Ca22chr6A_C_albicans_SC5314:497759-497843	37Control	37	OK	69.3918	270.204	1.96121	1.01199	0.18695	0.499453	no
C1_00070W_A	C1_00070W_A	C1_00070W_A	MVD	Ca22chr1A_C_albicans_SC5314:13777-16116	37Control	37	OK	67.7109	262.494	1.95483	1.30413	0.08395	0.308406	no
CR_10650W_A	CR_10650W_A	CR_10650W_A	LTV1	Ca22chrRA_C_albicans_SC5314:2255687-2256839	37Control	37	OK	24.3228	93.9112	1.94899	2.44435	0.00105	0.0206223	yes
CR_02980C_A	CR_02980C_A	CR_02980C_A	SRP40	Ca22chrRA_C_albicans_SC5314:685568-686855	37Control	37	OK	52.9145	204.299	1.94895	2.238	0.00295	0.0390466	yes
C4_04910C_A	C4_04910C_A	C4_04910C_A	SPC34	Ca22chr4A_C_albicans_SC5314:1055977-1056721	37Control	37	OK	13.134	50.6106	1.94613	2.18792	0.0042	0.0484724	yes
C1_10260C_A	C1_10260C_A	C1_10260C_A	RPA34	Ca22chr1A_C_albicans_SC5314:2266204-2266927	37Control	37	OK	60.7892	234.037	1.94485	2.39534	0.0012	0.0223119	yes
CR_06450W_A	CR_06450W_A	CR_06450W_A	CR_06450W_A	Ca22chrRA_C_albicans_SC5314:1378086-1380147	37Control	37	OK	5.8743	22.5774	1.94239	2.34032	0.00115	0.0218129	yes
C4_04840C_A	C4_04840C_A	C4_04840C_A	AGP3	Ca22chr4A_C_albicans_SC5314:1039531-1041073	37Control	37	OK	7.21636	27.6976	1.94042	2.13287	0.0057	0.0583159	no
C2_06810C_A	C2_06810C_A	C2_06810C_A	RPL11	Ca22chr2A_C_albicans_SC5314:1395462-1396380	37Control	37	OK	1276.73	4890.03	1.93739	1.64262	0.02215	0.136965	no
C4_00510C_A	C4_00510C_A	C4_00510C_A	RLP24	Ca22chr4A_C_albicans_SC5314:89383-90013	37Control	37	OK	116.908	447.499	1.93652	2.29083	0.0022	0.0322216	yes
C1_11410C_A	C1_11410C_A	C1_11410C_A	C1_11410C_A	Ca22chr1A_C_albicans_SC5314:2503462-2503804	37Control	37	OK	52.1391	199.196	1.93375	2.13077	0.0035	0.0438606	yes
C4_05850C_A	C4_05850C_A	C4_05850C_A	C4_05850C_A	Ca22chr4A_C_albicans_SC5314:1293693-1294932	37Control	37	OK	17.6972	67.603	1.93357	2.26415	0.00135	0.0240106	yes
C3_04680W_A	C3_04680W_A	C3_04680W_A	RPP2B	Ca22chr3A_C_albicans_SC5314:993010-993346	37Control	37	OK	2318.12	8836.39	1.9305	1.68703	0.02715	0.155055	no
C4_04890C_A	C4_04890C_A	C4_04890C_A	RPL24A	Ca22chr4A_C_albicans_SC5314:1054050-1054518	37Control	37	OK	2116.31	8052.36	1.92786	1.52867	0.0276	0.156345	no
C1_14110C_A	C1_14110C_A	C1_14110C_A	RPL4B	Ca22chr1A_C_albicans_SC5314:3106573-3107665	37Control	37	OK	678.589	2578.7	1.92603	1.53085	0.02285	0.13987	no
C7_01030C_A	C7_01030C_A	C7_01030C_A	C7_01030C_A	Ca22chr7A_C_albicans_SC5314:214924-218578	37Control	37	OK	21.9503	83.3448	1.92485	2.20759	0.0047	0.0519205	no
C1_13820C_A	C1_13820C_A	C1_13820C_A	C1_13820C_A	Ca22chr1A_C_albicans_SC5314:3037434-3038457	37Control	37	OK	21.2142	80.4825	1.92364	2.22485	0.00175	0.028172	yes
C4_04390W_A	C4_04390W_A	C4_04390W_A	C4_04390W_A	Ca22chr4A_C_albicans_SC5314:936829-937776	37Control	37	OK	1723.97	6534.82	1.92241	1.67541	0.0287	0.16012	no
CR_01010W_A	CR_01010W_A	CR_01010W_A	TEN1	Ca22chrRA_C_albicans_SC5314:227652-228033	37Control	37	OK	13.3015	50.3447	1.92025	1.79153	0.01415	0.103743	no
C1_02480W_A	C1_02480W_A	C1_02480W_A	PMM1	Ca22chr1A_C_albicans_SC5314:523975-524734	37Control	37	OK	151.256	572.452	1.92016	1.93392	0.00585	0.059112	no
C2_06360C_A	C2_06360C_A	C2_06360C_A	MAK16	Ca22chr2A_C_albicans_SC5314:1299919-1300867	37Control	37	OK	65.0577	246.211	1.9201	2.20714	0.0039	0.0466687	yes
C1_13400C_A	C1_13400C_A	C1_13400C_A	AGC1	Ca22chr1A_C_albicans_SC5314:2919984-2922180	37Control	37	OK	17.1983	65.0458	1.91919	2.19836	0.0043	0.0491447	yes
C5_01600C_A	C5_01600C_A	C5_01600C_A	SPB4	Ca22chr5A_C_albicans_SC5314:355184-357080	37Control	37	OK	9.53508	36.0518	1.91875	2.24301	0.00285	0.0382334	yes
CR_10690W_A	CR_10690W_A	CR_10690W_A	POP3	Ca22chrRA_C_albicans_SC5314:2265596-2266343	37Control	37	OK	25.3994	95.8134	1.91543	2.3358	0.0017	0.0276268	yes
CR_09800C_A	CR_09800C_A	CR_09800C_A	CR_09800C_A	Ca22chrRA_C_albicans_SC5314:2092516-2095135	37Control	37	OK	17.7569	66.9403	1.9145	2.31545	0.0014	0.0245065	yes
C2_09920W_A	C2_09920W_A	C2_09920W_A	C2_09920W_A	Ca22chr2A_C_albicans_SC5314:2027267-2027756	37Control	37	OK	22.8989	86.2697	1.91357	2.15052	0.00415	0.0482204	yes
C4_03030C_A	C4_03030C_A	C4_03030C_A	NAN1	Ca22chr4A_C_albicans_SC5314:630578-633098	37Control	37	OK	23.8218	89.2941	1.90628	2.27842	0.00085	0.0180493	yes
C1_04130W_A	C1_04130W_A	C1_04130W_A	ERB1	Ca22chr1A_C_albicans_SC5314:864121-866671	37Control	37	OK	23.0664	86.4175	1.90553	2.29771	0.0018	0.0286827	yes
C4_04900W_A	C4_04900W_A	C4_04900W_A	RPL30	Ca22chr4A_C_albicans_SC5314:1055340-1055842	37Control	37	OK	2705.03	10117.4	1.90313	1.65219	0.0315	0.169952	no
C3_01280W_A	C3_01280W_A	C3_01280W_A	C3_01280W_A	Ca22chr3A_C_albicans_SC5314:274497-275166	37Control	37	OK	38.1065	142.372	1.90156	2.3862	0.0005	0.0131346	yes
C4_05650W_A	C4_05650W_A	C4_05650W_A	C4_05650W_A	Ca22chr4A_C_albicans_SC5314:1240100-1241087	37Control	37	OK	30.2262	112.909	1.9013	2.37642	0.00105	0.0206223	yes
CR_01780W_A	CR_01780W_A	CR_01780W_A	CR_01780W_A	Ca22chrRA_C_albicans_SC5314:404536-405496	37Control	37	OK	25.9621	96.8002	1.8986	2.39905	0.0006	0.0145444	yes
C3_07150C_A	C3_07150C_A	C3_07150C_A	RPS12	Ca22chr3A_C_albicans_SC5314:1636560-1636992	37Control	37	OK	1723.67	6418.52	1.89676	1.60569	0.02635	0.152669	no
CR_01060W_A	CR_01060W_A	CR_01060W_A	LAG1	Ca22chrRA_C_albicans_SC5314:238177-239416	37Control	37	OK	28.4765	105.767	1.89305	2.35948	0.0014	0.0245065	yes
C2_01000W_A	C2_01000W_A	C2_01000W_A	HGT7	Ca22chr2A_C_albicans_SC5314:164438-166079	37Control	37	OK	420.91	1559.79	1.88977	1.18499	0.10925	0.361702	no
C1_04660W_A	C1_04660W_A	C1_04660W_A	DUR1,2	Ca22chr1A_C_albicans_SC5314:965165-970607	37Control	37	OK	3.24412	12.0215	1.88971	2.37569	0.00075	0.0168772	yes
C2_02430W_A	C2_02430W_A	C2_02430W_A	UTP21	Ca22chr2A_C_albicans_SC5314:481326-484155	37Control	37	OK	19.4506	71.9874	1.88793	2.14031	0.00585	0.059112	no
C7_03700C_A	C7_03700C_A	C7_03700C_A	ENP1	Ca22chr7A_C_albicans_SC5314:822570-823998	37Control	37	OK	35.6763	131.997	1.88747	2.28759	0.0016	0.0264351	yes
C7_00560C_A	C7_00560C_A	C7_00560C_A	THG1	Ca22chr7A_C_albicans_SC5314:91358-92165	37Control	37	OK	18.6384	68.9554	1.88739	2.27258	0.0017	0.0276268	yes
C2_06520C_A	C2_06520C_A	C2_06520C_A	C2_06520C_A	Ca22chr2A_C_albicans_SC5314:1323079-1323985	37Control	37	OK	26.6178	98.4474	1.88696	2.20564	0.0026	0.0360081	yes
C4_05780C_A	C4_05780C_A	C4_05780C_A	CFL2	Ca22chr4A_C_albicans_SC5314:1276924-1279141	37Control	37	OK	3.08038	11.3733	1.88447	2.02872	0.00695	0.0653536	no
C2_09900C_A	C2_09900C_A	C2_09900C_A	TIM23	Ca22chr2A_C_albicans_SC5314:2025548-2026205	37Control	37	OK	95.6263	352.753	1.88318	2.28522	0.0023	0.0330943	yes
C7_00500W_A	C7_00500W_A	C7_00500W_A	C7_00500W_A	Ca22chr7A_C_albicans_SC5314:81173-81905	37Control	37	OK	66.6643	245.835	1.8827	1.9006	0.009	0.0769473	no
C1_06460C_A	C1_06460C_A	C1_06460C_A	RPS22A	Ca22chr1A_C_albicans_SC5314:1377035-1377428	37Control	37	OK	2886.51	10639.7	1.88206	1.49931	0.02795	0.157711	no
C7_00470C_A	C7_00470C_A	C7_00470C_A	PEL1	Ca22chr7A_C_albicans_SC5314:76424-77930	37Control	37	OK	25.4898	93.8903	1.88106	2.27218	0.0027	0.0369314	yes
C1_02330C_A	C1_02330C_A	C1_02330C_A	C1_02330C_A	Ca22chr1A_C_albicans_SC5314:487349-488196	37Control	37	OK	1767.04	6498.37	1.87875	1.63929	0.02945	0.162809	no
C1_13370W_A	C1_13370W_A	C1_13370W_A	C1_13370W_A	Ca22chr1A_C_albicans_SC5314:2914940-2916115	37Control	37	OK	18.8856	69.3153	1.87588	2.31052	0.0012	0.0223119	yes
C2_05620W_A	C2_05620W_A	C2_05620W_A	KTI11	Ca22chr2A_C_albicans_SC5314:1143166-1143379	37Control	37	OK	226.787	832.336	1.87583	1.91731	0.00845	0.0740949	no
C3_03790W_A	C3_03790W_A	C3_03790W_A	MEU1	Ca22chr3A_C_albicans_SC5314:794779-795814	37Control	37	OK	49.9737	183.219	1.87433	2.27413	0.00205	0.0310135	yes
C7_00570W_A	C7_00570W_A	C7_00570W_A	RPA135	Ca22chr7A_C_albicans_SC5314:92422-95923	37Control	37	OK	25.5678	93.6123	1.87237	2.13064	0.0054	0.056505	no
CR_10340W_A	CR_10340W_A	CR_10340W_A	PTP3	Ca22chrRA_C_albicans_SC5314:2206794-2209563	37Control	37	OK	33.6222	123.055	1.87182	1.86883	0.0077	0.0700964	no
C3_05100C_A	C3_05100C_A	C3_05100C_A	RPL18	Ca22chr3A_C_albicans_SC5314:1096554-1097574	37Control	37	OK	1316.42	4813.61	1.8705	1.5225	0.03675	0.186422	no
C4_04080C_A	C4_04080C_A	C4_04080C_A	PGA31	Ca22chr4A_C_albicans_SC5314:874031-875090	37Control	37	OK	4.03405	14.7075	1.86625	1.63869	0.02605	0.151342	no
C2_05610C_A	C2_05610C_A	C2_05610C_A	RPS8A	Ca22chr2A_C_albicans_SC5314:1141640-1142261	37Control	37	OK	1678.74	6116.66	1.86537	1.49272	0.03225	0.17193	no
C7_00490C_A	C7_00490C_A	C7_00490C_A	C7_00490C_A	Ca22chr7A_C_albicans_SC5314:81173-81905	37Control	37	OK	15.8438	57.6289	1.86287	1.33484	0.04395	0.207676	no
CR_06770C_A	CR_06770C_A	CR_06770C_A	CR_06770C_A	Ca22chrRA_C_albicans_SC5314:1453897-1454575	37Control	37	OK	29.6127	107.576	1.86107	2.09011	0.00475	0.0522278	no
C3_07980C_A	C3_07980C_A	C3_07980C_A	C3_07980C_A	Ca22chr3A_C_albicans_SC5314:1795808-1796210	37Control	37	OK	30.0338	109.06	1.86047	2.06966	0.0053	0.0560817	no
CR_02520W_A	CR_02520W_A	CR_02520W_A	RPC19	Ca22chrRA_C_albicans_SC5314:560831-561227	37Control	37	OK	154.845	561.887	1.85945	2.33083	0.0021	0.0313419	yes
C3_07410C_A	C3_07410C_A	C3_07410C_A	KRS1	Ca22chr3A_C_albicans_SC5314:1697166-1698951	37Control	37	OK	96.5147	349.799	1.85771	1.58073	0.0437	0.207119	no
C1_06580W_A	C1_06580W_A	C1_06580W_A	RPS23A	Ca22chr1A_C_albicans_SC5314:1408971-1409409	37Control	37	OK	2190.51	7928.87	1.85585	1.5273	0.036	0.184055	no
C1_13050W_A	C1_13050W_A	C1_13050W_A	RPL14	Ca22chr1A_C_albicans_SC5314:2839747-2840497	37Control	37	OK	1961.51	7095.69	1.85498	1.59296	0.03325	0.174983	no
C1_07710C_A	C1_07710C_A	C1_07710C_A	ADE4	Ca22chr1A_C_albicans_SC5314:1677048-1678674	37Control	37	OK	62.0558	223.61	1.84935	2.05584	0.0039	0.0466687	yes
C2_06250C_A	C2_06250C_A	C2_06250C_A	CDC46	Ca22chr2A_C_albicans_SC5314:1272571-1274758	37Control	37	OK	14.8586	53.5179	1.84872	2.2998	0.00175	0.028172	yes
C1_11360W_A	C1_11360W_A	C1_11360W_A	RPL37B	Ca22chr1A_C_albicans_SC5314:2491975-2492601	37Control	37	OK	4656.87	16771.4	1.84857	1.59605	0.0292	0.162093	no
C6_01120C_A	C6_01120C_A	C6_01120C_A	C6_01120C_A	Ca22chr6A_C_albicans_SC5314:219754-220552	37Control	37	OK	8.06014	28.9995	1.84715	1.9888	0.00395	0.0469983	yes
CR_04780W_A	CR_04780W_A	CR_04780W_A	RPB8	Ca22chrRA_C_albicans_SC5314:1036031-1036478	37Control	37	OK	125.78	452.527	1.8471	2.29486	0.00155	0.0258814	yes
CR_00180C_A	CR_00180C_A	CR_00180C_A	CHT1	Ca22chrRA_C_albicans_SC5314:41615-44739	37Control	37	OK	6.39085	22.9581	1.84493	0.973375	0.23945	0.572922	no
C4_00750C_A	C4_00750C_A	C4_00750C_A	C4_00750C_A	Ca22chr4A_C_albicans_SC5314:126563-127100	37Control	37	OK	27.4241	98.4582	1.84407	2.01484	0.00815	0.0724765	no
C5_03540C_A	C5_03540C_A	C5_03540C_A	RPS25B	Ca22chr5A_C_albicans_SC5314:793425-793743	37Control	37	OK	3997.12	14348.6	1.84388	1.4864	0.03675	0.186422	no
C5_02530W_A	C5_02530W_A	C5_02530W_A	UAP1	Ca22chr5A_C_albicans_SC5314:565048-566509	37Control	37	OK	42.9476	154.074	1.84298	2.24904	0.0016	0.0264351	yes
CR_03380W_A	CR_03380W_A	CR_03380W_A	MTG1	Ca22chrRA_C_albicans_SC5314:750307-753240	37Control	37	OK	20.4839	73.368	1.84066	1.62295	0.03435	0.178379	no
C5_01060C_A	C5_01060C_A	C5_01060C_A	BUD23	Ca22chr5A_C_albicans_SC5314:224787-225603	37Control	37	OK	30.2087	108.163	1.84017	2.28241	0.002	0.030502	yes
C1_07230W_A	C1_07230W_A	C1_07230W_A	PHO15	Ca22chr1A_C_albicans_SC5314:1551709-1552636	37Control	37	OK	44.7314	160.082	1.83945	1.89784	0.01075	0.0869743	no
CR_03840C_A	CR_03840C_A	CR_03840C_A	CR_03840C_A	Ca22chrRA_C_albicans_SC5314:857987-858500	37Control	37	OK	25.0583	89.6449	1.83893	2.05915	0.005	0.0539376	no
CR_01950W_A	CR_01950W_A	CR_01950W_A	CR_01950W_A	Ca22chrRA_C_albicans_SC5314:427486-428386	37Control	37	OK	77.3314	276.347	1.83736	2.22633	0.002	0.030502	yes
C4_05330C_A	C4_05330C_A	C4_05330C_A	C4_05330C_A	Ca22chr4A_C_albicans_SC5314:1160201-1161677	37Control	37	OK	27.0574	96.6387	1.83658	2.26309	0.0011	0.0211629	yes
C1_11060C_A	C1_11060C_A	C1_11060C_A	RPL2	Ca22chr1A_C_albicans_SC5314:2435728-2436897	37Control	37	OK	2007.41	7149.89	1.83259	1.41607	0.025	0.14761	no
CR_03570C_A	CR_03570C_A	CR_03570C_A	YVH1	Ca22chrRA_C_albicans_SC5314:790131-791100	37Control	37	OK	26.6918	95.0059	1.83162	2.26867	0.00195	0.0301051	yes
CR_04770C_A	CR_04770C_A	CR_04770C_A	CR_04770C_A	Ca22chrRA_C_albicans_SC5314:1034921-1035491	37Control	37	OK	19.8111	70.4636	1.83057	1.85608	0.0126	0.0963153	no
C3_03440C_A	C3_03440C_A	C3_03440C_A	C3_03440C_A	Ca22chr3A_C_albicans_SC5314:726383-728315	37Control	37	OK	9.95332	35.3587	1.82882	2.03278	0.0058	0.0588594	no
C5_02240W_A	C5_02240W_A	C5_02240W_A	PTH2	Ca22chr5A_C_albicans_SC5314:498690-499884	37Control	37	OK	2.12996	7.56295	1.82812	1.70597	0.01575	0.110815	no
CR_02370W_A	CR_02370W_A	CR_02370W_A	ERG25	Ca22chrRA_C_albicans_SC5314:527701-528628	37Control	37	OK	57.2287	202.975	1.82649	2.2474	0.0025	0.0350353	yes
CR_08090W_A	CR_08090W_A	CR_08090W_A	SSB1	Ca22chrRA_C_albicans_SC5314:1762391-1764233	37Control	37	OK	684.511	2425.61	1.8252	1.40747	0.02455	0.146072	no
C1_06540C_A	C1_06540C_A	C1_06540C_A	C1_06540C_A	Ca22chr1A_C_albicans_SC5314:1395027-1396152	37Control	37	OK	24.2602	85.9288	1.82455	2.29702	0.0011	0.0211629	yes
C1_07200W_A	C1_07200W_A	C1_07200W_A	YMC1	Ca22chr1A_C_albicans_SC5314:1545380-1546280	37Control	37	OK	33.9008	119.739	1.8205	2.1539	0.003	0.0394313	yes
C4_03520C_A	C4_03520C_A	C4_03520C_A	RBT1	Ca22chr4A_C_albicans_SC5314:745165-747331	37Control	37	OK	2.92818	10.3074	1.81561	1.91962	0.0077	0.0700964	no
C2_00210W_A	C2_00210W_A	C2_00210W_A	RPL38	Ca22chr2A_C_albicans_SC5314:28552-28789	37Control	37	OK	6024.36	21205.4	1.81555	1.58697	0.0321	0.171714	no
C4_04410C_A	C4_04410C_A	C4_04410C_A	LYS4	Ca22chr4A_C_albicans_SC5314:944102-946157	37Control	37	OK	24.0164	84.473	1.81447	2.15959	0.0043	0.0491447	yes
C1_01370C_A	C1_01370C_A	C1_01370C_A	RPS21B	Ca22chr1A_C_albicans_SC5314:269371-270012	37Control	37	OK	5660.93	19877.8	1.81205	1.51629	0.02735	0.155725	no
C5_05080W_A	C5_05080W_A	C5_05080W_A	GRF10	Ca22chr5A_C_albicans_SC5314:1119030-1121088	37Control	37	OK	31.5389	110.673	1.81111	1.68302	0.0395	0.194099	no
C4_03940C_A	C4_03940C_A	C4_03940C_A	PYC2	Ca22chr4A_C_albicans_SC5314:837700-841234	37Control	37	OK	37.8052	132.528	1.80963	1.72314	0.0187	0.122766	no
C1_08810C_A	C1_08810C_A	C1_08810C_A	MSS116	Ca22chr1A_C_albicans_SC5314:1918865-1920872	37Control	37	OK	53.5324	187.583	1.80904	1.82255	0.01795	0.119975	no
C2_04080W_A	C2_04080W_A	C2_04080W_A	C2_04080W_A	Ca22chr2A_C_albicans_SC5314:858565-860644	37Control	37	OK	65.2879	228.673	1.8084	1.84529	0.0159	0.111703	no
C1_08900W_A	C1_08900W_A	C1_08900W_A	C1_08900W_A	Ca22chr1A_C_albicans_SC5314:1933790-1935467	37Control	37	OK	14.1143	49.3716	1.80652	2.11571	0.00285	0.0382334	yes
C1_10620W_A	C1_10620W_A	C1_10620W_A	C1_10620W_A	Ca22chr1A_C_albicans_SC5314:2352464-2353904	37Control	37	OK	120.826	421.68	1.80322	1.82264	0.0142	0.103907	no
CR_00560W_A	CR_00560W_A	CR_00560W_A	NTH1	Ca22chrRA_C_albicans_SC5314:130641-133365	37Control	37	OK	14.0865	49.155	1.80302	2.24989	0.00085	0.0180493	yes
C7_01260W_A	C7_01260W_A	C7_01260W_A	C7_01260W_A	Ca22chr7A_C_albicans_SC5314:257911-259124	37Control	37	OK	330.021	1148.69	1.79936	0.0425778	0.379	0.729106	no
CR_02710W_A	CR_02710W_A	CR_02710W_A	RRP9	Ca22chrRA_C_albicans_SC5314:620809-622459	37Control	37	OK	27.6205	96.1102	1.79895	2.20598	0.0034	0.0430081	yes
C4_01450W_A	C4_01450W_A	C4_01450W_A	PWP1	Ca22chr4A_C_albicans_SC5314:305251-307093	37Control	37	OK	46.8788	162.893	1.79692	2.01568	0.0074	0.0684573	no
C5_03920C_A	C5_03920C_A	C5_03920C_A	C5_03920C_A	Ca22chr5A_C_albicans_SC5314:858498-859104	37Control	37	OK	59.7793	207.516	1.79551	2.24349	0.00265	0.0364327	yes
C3_07820W_A	C3_07820W_A	C3_07820W_A	C3_07820W_A	Ca22chr3A_C_albicans_SC5314:1775573-1775900	37Control	37	OK	184.492	640.303	1.7952	2.14357	0.00285	0.0382334	yes
C1_10880W_A	C1_10880W_A	C1_10880W_A	C1_10880W_A	Ca22chr1A_C_albicans_SC5314:2407717-2409846	37Control	37	OK	46.0124	159.598	1.79435	1.17897	0.1001	0.342735	no
C1_07790C_A	C1_07790C_A	C1_07790C_A	C1_07790C_A	Ca22chr1A_C_albicans_SC5314:1699241-1700171	37Control	37	OK	29.0592	100.777	1.7941	2.20487	0.00255	0.0355772	yes
C6_02210W_A	C6_02210W_A	C6_02210W_A	C6_02210W_A	Ca22chr6A_C_albicans_SC5314:460065-460428	37Control	37	OK	33.17	114.997	1.79364	1.8859	0.00785	0.0707778	no
C1_13200C_A	C1_13200C_A	C1_13200C_A	REX3	Ca22chr1A_C_albicans_SC5314:2881256-2882471	37Control	37	OK	7.76399	26.9089	1.79321	2.00192	0.00685	0.064834	no
C2_05080C_A	C2_05080C_A	C2_05080C_A	C2_05080C_A	Ca22chr2A_C_albicans_SC5314:1051685-1052672	37Control	37	OK	21.9181	75.9531	1.79298	2.24259	0.00115	0.0218129	yes
C4_03380C_A	C4_03380C_A	C4_03380C_A	DAO2	Ca22chr4A_C_albicans_SC5314:708486-709644	37Control	37	OK	23.0569	79.8449	1.792	2.1227	0.00435	0.0494461	yes
C4_01080W_A	C4_01080W_A	C4_01080W_A	RAT1	Ca22chr4A_C_albicans_SC5314:219420-222327	37Control	37	OK	12.3673	42.6712	1.78673	2.27224	0.00145	0.0248732	yes
C2_03810C_A	C2_03810C_A	C2_03810C_A	RPL21A	Ca22chr2A_C_albicans_SC5314:804381-805193	37Control	37	OK	2167.89	7478.73	1.7865	1.45193	0.0385	0.19113	no
C1_10970W_A	C1_10970W_A	C1_10970W_A	C1_10970W_A	Ca22chr1A_C_albicans_SC5314:2419610-2421629	37Control	37	OK	24.8949	85.7341	1.78402	2.1787	0.00355	0.0442224	yes
C1_05640C_A	C1_05640C_A	C1_05640C_A	FAL1	Ca22chr1A_C_albicans_SC5314:1181155-1182355	37Control	37	OK	32.4922	111.876	1.78373	2.22765	0.00085	0.0180493	yes
C5_04750C_A	C5_04750C_A	C5_04750C_A	HAS1	Ca22chr5A_C_albicans_SC5314:1032681-1034379	37Control	37	OK	60.0883	206.75	1.78273	2.0133	0.00615	0.0610945	no
C1_04450C_A	C1_04450C_A	C1_04450C_A	FMA1	Ca22chr1A_C_albicans_SC5314:917490-918323	37Control	37	OK	140.328	481.969	1.78014	1.60523	0.0419	0.201838	no
CR_04750W_A	CR_04750W_A	CR_04750W_A	CR_04750W_A	Ca22chrRA_C_albicans_SC5314:1032103-1032370	37Control	37	OK	237.296	813.521	1.77749	2.2342	0.00115	0.0218129	yes
C4_04790W_A	C4_04790W_A	C4_04790W_A	FAV1	Ca22chr4A_C_albicans_SC5314:1027531-1030078	37Control	37	OK	1.22631	4.20392	1.77741	1.66906	0.0169	0.116003	no
C5_00030W_A	C5_00030W_A	C5_00030W_A	C5_00030W_A	Ca22chr5A_C_albicans_SC5314:3998-4808	37Control	37	OK	52.5214	179.899	1.77621	2.2601	0.00195	0.0301051	yes
C3_04580C_A	C3_04580C_A	C3_04580C_A	STP1	Ca22chr3A_C_albicans_SC5314:968945-970256	37Control	37	OK	35.7242	122.326	1.77576	2.23676	0.0012	0.0223119	yes
C2_10270W_A	C2_10270W_A	C2_10270W_A	PUS7	Ca22chr2A_C_albicans_SC5314:2114375-2116652	37Control	37	OK	19.0288	65.063	1.77365	2.10278	0.0047	0.0519205	no
CR_05620C_A	CR_05620C_A	CR_05620C_A	MTG2	Ca22chrRA_C_albicans_SC5314:1198840-1200487	37Control	37	OK	14.2566	48.6902	1.772	2.20175	0.003	0.0394313	yes
C4_00440C_A	C4_00440C_A	C4_00440C_A	OPT7	Ca22chr4A_C_albicans_SC5314:69498-71742	37Control	37	OK	12.538	42.8029	1.7714	2.12901	0.0041	0.0479351	yes
C2_07450C_A	C2_07450C_A	C2_07450C_A	RCL1	Ca22chr2A_C_albicans_SC5314:1521449-1522565	37Control	37	OK	49.4227	168.716	1.77135	2.13922	0.00325	0.0417272	yes
CR_09330C_A	CR_09330C_A	CR_09330C_A	CR_09330C_A	Ca22chrRA_C_albicans_SC5314:1977673-1980379	37Control	37	OK	21.0805	71.9479	1.77104	1.82134	0.01065	0.0863507	no
C6_02240C_A	C6_02240C_A	C6_02240C_A	RPL10A	Ca22chr6A_C_albicans_SC5314:465253-465907	37Control	37	OK	1904.59	6483.09	1.7672	1.39012	0.03855	0.191227	no
C5_04590C_A	C5_04590C_A	C5_04590C_A	RPL43A	Ca22chr5A_C_albicans_SC5314:997098-997750	37Control	37	OK	5454.28	18543.2	1.76543	1.42842	0.04685	0.216173	no
C2_09380W_A	C2_09380W_A	C2_09380W_A	RRP15	Ca22chr2A_C_albicans_SC5314:1911129-1911897	37Control	37	OK	72.4219	245.947	1.76385	2.07853	0.0057	0.0583159	no
CR_07710W_A	CR_07710W_A	CR_07710W_A	ARO2	Ca22chrRA_C_albicans_SC5314:1672492-1673734	37Control	37	OK	89.1546	302.716	1.76358	1.96051	0.00565	0.0579302	no
CR_04360C_A	CR_04360C_A	CR_04360C_A	NHP2	Ca22chrRA_C_albicans_SC5314:968672-969152	37Control	37	OK	336.175	1141.03	1.76305	1.96395	0.00645	0.0626861	no
C7_00630C_A	C7_00630C_A	C7_00630C_A	C7_00630C_A	Ca22chr7A_C_albicans_SC5314:103976-105816	37Control	37	OK	4.48613	15.1899	1.75957	1.85705	0.00675	0.0643402	no
CR_07630C_A	CR_07630C_A	CR_07630C_A	RPS27	Ca22chrRA_C_albicans_SC5314:1657162-1657839	37Control	37	OK	5456.25	18462.9	1.75865	1.53112	0.0408	0.198417	no
C5_02490C_A	C5_02490C_A	C5_02490C_A	TIF5	Ca22chr5A_C_albicans_SC5314:555199-556462	37Control	37	OK	42.4818	143.686	1.758	2.13183	0.00365	0.0449626	yes
C4_05640C_A	C4_05640C_A	C4_05640C_A	C4_05640C_A	Ca22chr4A_C_albicans_SC5314:1239057-1239897	37Control	37	OK	20.6526	69.8033	1.75697	2.09347	0.00455	0.0507998	no
C5_03480C_A	C5_03480C_A	C5_03480C_A	C5_03480C_A	Ca22chr5A_C_albicans_SC5314:780648-782214	37Control	37	OK	36.7571	124.225	1.75686	2.11698	0.00225	0.0326744	yes
C1_10870W_A	C1_10870W_A	C1_10870W_A	RPS17B	Ca22chr1A_C_albicans_SC5314:2406452-2407245	37Control	37	OK	2749.89	9283.75	1.75533	1.40007	0.0385	0.19113	no
CR_07750C_A	CR_07750C_A	CR_07750C_A	CR_07750C_A	Ca22chrRA_C_albicans_SC5314:1679975-1681796	37Control	37	OK	27.5623	92.867	1.75247	2.13395	0.00365	0.0449626	yes
C4_04320W_A	C4_04320W_A	C4_04320W_A	FRE10	Ca22chr4A_C_albicans_SC5314:923038-925159	37Control	37	OK	66.2022	222.905	1.75148	1.81336	0.016	0.112197	no
C1_00100C_A	C1_00100C_A	C1_00100C_A	C1_00100C_A	Ca22chr1A_C_albicans_SC5314:16599-17328	37Control	37	OK	21.8353	73.4789	1.75067	2.12295	0.00345	0.0434945	yes
C2_05840W_A	C2_05840W_A	C2_05840W_A	C2_05840W_A	Ca22chr2A_C_albicans_SC5314:1194846-1198435	37Control	37	OK	22.9555	77.2358	1.75043	1.41476	0.0551	0.238412	no
C2_06590C_A	C2_06590C_A	C2_06590C_A	GIT1	Ca22chr2A_C_albicans_SC5314:1334164-1335724	37Control	37	OK	12.6745	42.6443	1.75043	2.12518	0.0024	0.034142	yes
C5_00190C_A	C5_00190C_A	C5_00190C_A	FAS1	Ca22chr5A_C_albicans_SC5314:23547-29661	37Control	37	OK	84.8774	285.071	1.74787	1.16269	0.11595	0.37505	no
CR_09160C_A	CR_09160C_A	CR_09160C_A	ERG13	Ca22chrRA_C_albicans_SC5314:1951278-1952634	37Control	37	OK	122.923	412.725	1.74743	1.56865	0.0437	0.207119	no
C2_02630W_A	C2_02630W_A	C2_02630W_A	C2_02630W_A	Ca22chr2A_C_albicans_SC5314:530018-531332	37Control	37	OK	10.4568	35.04	1.74456	2.11943	0.0037	0.0453118	yes
C2_08040C_A	C2_08040C_A	C2_08040C_A	RPS10	Ca22chr2A_C_albicans_SC5314:1633292-1633968	37Control	37	OK	3681.02	12298.4	1.7403	1.42839	0.0473	0.216974	no
C2_09320C_A	C2_09320C_A	C2_09320C_A	PES1	Ca22chr2A_C_albicans_SC5314:1901072-1902836	37Control	37	OK	70.7793	236.17	1.73843	1.90091	0.00685	0.064834	no
CR_02420W_A	CR_02420W_A	CR_02420W_A	CR_02420W_A	Ca22chrRA_C_albicans_SC5314:538765-539575	37Control	37	OK	42.9674	143.308	1.7378	2.17788	0.00415	0.0482204	yes
C2_09500W_A	C2_09500W_A	C2_09500W_A	C2_09500W_A	Ca22chr2A_C_albicans_SC5314:1942007-1943411	37Control	37	OK	27.2418	90.8201	1.73719	2.18458	0.00145	0.0248732	yes
C5_03070W_A	C5_03070W_A	C5_03070W_A	RPS5	Ca22chr5A_C_albicans_SC5314:682962-683640	37Control	37	OK	1487.43	4954.64	1.73596	1.40705	0.0466	0.215707	no
C3_00330W_A	C3_00330W_A	C3_00330W_A	UTP8	Ca22chr3A_C_albicans_SC5314:46160-48251	37Control	37	OK	32.8601	109.456	1.73594	2.08588	0.00285	0.0382334	yes
C2_03230C_A	C2_03230C_A	C2_03230C_A	FEN12	Ca22chr2A_C_albicans_SC5314:663648-664527	37Control	37	OK	68.5149	228.215	1.7359	2.13621	0.0041	0.0479351	yes
CR_08940W_A	CR_08940W_A	CR_08940W_A	CR_08940W_A	Ca22chrRA_C_albicans_SC5314:1914209-1915217	37Control	37	OK	38.7201	128.685	1.73269	2.20759	0.0016	0.0264351	yes
C1_03110W_A	C1_03110W_A	C1_03110W_A	RPL6	Ca22chr1A_C_albicans_SC5314:650063-650956	37Control	37	OK	1957.95	6506.68	1.73258	1.43043	0.0488	0.221588	no
C3_01470W_A	C3_01470W_A	C3_01470W_A	ARF3	Ca22chr3A_C_albicans_SC5314:315065-315707	37Control	37	OK	68.9985	229.173	1.7318	2.21255	0.0023	0.0330943	yes
C4_00810C_A	C4_00810C_A	C4_00810C_A	C4_00810C_A	Ca22chr4A_C_albicans_SC5314:144137-145490	37Control	37	OK	16.0982	53.4412	1.73106	2.03759	0.00485	0.0528339	no
C1_10610W_A	C1_10610W_A	C1_10610W_A	FCY23	Ca22chr1A_C_albicans_SC5314:2349805-2351599	37Control	37	OK	16.4941	54.7534	1.731	2.05453	0.00575	0.0585096	no
CR_03030C_A	CR_03030C_A	CR_03030C_A	RPL28	Ca22chrRA_C_albicans_SC5314:692730-693531	37Control	37	OK	2965.26	9834.16	1.72965	1.39573	0.0438	0.207332	no
CR_00680W_A	CR_00680W_A	CR_00680W_A	BUD22	Ca22chrRA_C_albicans_SC5314:167244-168624	37Control	37	OK	23.1974	76.9239	1.72947	2.17816	0.0033	0.0421679	yes
C5_03470C_A	C5_03470C_A	C5_03470C_A	C5_03470C_A	Ca22chr5A_C_albicans_SC5314:778702-780199	37Control	37	OK	27.745	91.9999	1.72941	2.1927	0.0021	0.0313419	yes
CR_03940W_A	CR_03940W_A	CR_03940W_A	CR_03940W_A	Ca22chrRA_C_albicans_SC5314:894730-895831	37Control	37	OK	46.5199	154.218	1.72905	2.08199	0.0047	0.0519205	no
CR_03540W_A	CR_03540W_A	CR_03540W_A	CR_03540W_A	Ca22chrRA_C_albicans_SC5314:786517-787492	37Control	37	OK	22.8199	75.6401	1.72886	2.17981	0.00165	0.0270007	yes
C2_06390C_A	C2_06390C_A	C2_06390C_A	IMH3	Ca22chr2A_C_albicans_SC5314:1302198-1304011	37Control	37	OK	253.766	840.19	1.72722	1.59392	0.01865	0.122651	no
C6_01630W_A	C6_01630W_A	C6_01630W_A	TIF3	Ca22chr6A_C_albicans_SC5314:337223-338591	37Control	37	OK	84.6686	280.092	1.726	1.94706	0.0079	0.0710585	no
C1_11420W_A	C1_11420W_A	C1_11420W_A	KRR1	Ca22chr1A_C_albicans_SC5314:2504034-2505111	37Control	37	OK	65.5691	216.738	1.72486	2.02047	0.00475	0.0522278	no
CR_01400W_A	CR_01400W_A	CR_01400W_A	LYS12	Ca22chrRA_C_albicans_SC5314:332021-333152	37Control	37	OK	138.36	457	1.72377	1.4874	0.05555	0.239096	no
C6_03760C_A	C6_03760C_A	C6_03760C_A	SHM2	Ca22chr6A_C_albicans_SC5314:810621-812034	37Control	37	OK	229.662	758.516	1.72367	1.08763	0.13785	0.41443	no
C1_10500W_A	C1_10500W_A	C1_10500W_A	C1_10500W_A	Ca22chr1A_C_albicans_SC5314:2323931-2324456	37Control	37	OK	51.3651	169.629	1.72352	1.83159	0.01445	0.104962	no
C5_01710C_A	C5_01710C_A	C5_01710C_A	C5_01710C_A	Ca22chr5A_C_albicans_SC5314:385278-387495	37Control	37	OK	4.46877	14.7508	1.72285	1.88995	0.0115	0.0910477	no
C2_06960W_A	C2_06960W_A	C2_06960W_A	SPE3	Ca22chr2A_C_albicans_SC5314:1427772-1428666	37Control	37	OK	126.181	416.187	1.72174	1.74459	0.02355	0.142809	no
C1_11040W_A	C1_11040W_A	C1_11040W_A	RPL29	Ca22chr1A_C_albicans_SC5314:2433983-2434175	37Control	37	OK	9663.58	31860.4	1.72114	1.4897	0.0473	0.216974	no
CR_10830C_A	CR_10830C_A	CR_10830C_A	CR_10830C_A	Ca22chrRA_C_albicans_SC5314:2282795-2283272	37Control	37	OK	79.7866	262.895	1.72027	2.136	0.0028	0.0378321	yes
C3_01440C_A	C3_01440C_A	C3_01440C_A	C3_01440C_A	Ca22chr3A_C_albicans_SC5314:307531-307839	37Control	37	OK	6.24212	20.5482	1.7189	1.21989	0.10635	0.355854	no
C3_05730C_A	C3_05730C_A	C3_05730C_A	LAC1	Ca22chr3A_C_albicans_SC5314:1283573-1284857	37Control	37	OK	22.5978	74.2588	1.71638	2.10545	0.00325	0.0417272	yes
C2_05960C_A	C2_05960C_A	C2_05960C_A	C2_05960C_A	Ca22chr2A_C_albicans_SC5314:1215976-1216873	37Control	37	OK	9.33206	30.6549	1.71585	1.84726	0.01015	0.0835556	no
C5_04490C_A	C5_04490C_A	C5_04490C_A	CAR1	Ca22chr5A_C_albicans_SC5314:981843-982797	37Control	37	OK	89.3936	293.616	1.71569	2.00513	0.0043	0.0491447	yes
C2_05090W_A	C2_05090W_A	C2_05090W_A	MAK5	Ca22chr2A_C_albicans_SC5314:1052875-1055224	37Control	37	OK	24.2259	79.3011	1.71079	2.08863	0.00425	0.04884	yes
C1_07500C_A	C1_07500C_A	C1_07500C_A	LHP1	Ca22chr1A_C_albicans_SC5314:1623837-1624812	37Control	37	OK	76.9263	251.75	1.71044	2.02582	0.00265	0.0364327	yes
CR_07310W_A	CR_07310W_A	CR_07310W_A	CR_07310W_A	Ca22chrRA_C_albicans_SC5314:1592133-1594029	37Control	37	OK	10.8099	35.3519	1.70944	2.1664	0.00235	0.0335829	yes
C2_05830C_A	C2_05830C_A	C2_05830C_A	C2_05830C_A	Ca22chr2A_C_albicans_SC5314:1193132-1194662	37Control	37	OK	11.6944	38.2215	1.70856	1.99843	0.00705	0.0659974	no
C1_12800W_A	C1_12800W_A	C1_12800W_A	C1_12800W_A	Ca22chr1A_C_albicans_SC5314:2789386-2789872	37Control	37	OK	8.94946	29.1544	1.70384	1.60793	0.0231	0.141217	no
C4_04150C_A	C4_04150C_A	C4_04150C_A	PDB1	Ca22chr4A_C_albicans_SC5314:885457-886597	37Control	37	OK	361.663	1176	1.70118	1.46711	0.04365	0.207038	no
C3_06220C_A	C3_06220C_A	C3_06220C_A	OAC1	Ca22chr3A_C_albicans_SC5314:1419827-1420880	37Control	37	OK	5.18045	16.8307	1.69994	1.63961	0.02975	0.163795	no
CR_06120W_A	CR_06120W_A	CR_06120W_A	RPL7	Ca22chrRA_C_albicans_SC5314:1308686-1309574	37Control	37	OK	86.2739	280.237	1.69965	2.05639	0.00435	0.0494461	yes
CR_09950C_A	CR_09950C_A	CR_09950C_A	SIK1	Ca22chrRA_C_albicans_SC5314:2127985-2129536	37Control	37	OK	199.736	648.411	1.69882	1.59942	0.01805	0.120174	no
C5_02590C_A	C5_02590C_A	C5_02590C_A	C5_02590C_A	Ca22chr5A_C_albicans_SC5314:576551-579308	37Control	37	OK	13.1205	42.5789	1.69831	1.89293	0.00695	0.0653536	no
C2_04600C_A	C2_04600C_A	C2_04600C_A	RPL17B	Ca22chr2A_C_albicans_SC5314:961319-961877	37Control	37	OK	1719.58	5568.36	1.6952	1.38062	0.0534	0.23445	no
C1_02790W_A	C1_02790W_A	C1_02790W_A	TIF34	Ca22chr1A_C_albicans_SC5314:582898-583951	37Control	37	OK	127.266	410.51	1.68958	1.86414	0.0077	0.0700964	no
C6_03210C_A	C6_03210C_A	C6_03210C_A	C6_03210C_A	Ca22chr6A_C_albicans_SC5314:675260-676253	37Control	37	OK	20.4358	65.8896	1.68895	1.96999	0.0085	0.0742912	no
C1_04290C_A	C1_04290C_A	C1_04290C_A	ACS2	Ca22chr1A_C_albicans_SC5314:886009-889117	37Control	37	OK	160.885	518.679	1.68881	1.38501	0.0319	0.170984	no
C6_01130W_A	C6_01130W_A	C6_01130W_A	C6_01130W_A	Ca22chr6A_C_albicans_SC5314:220838-221612	37Control	37	OK	3.19582	10.2964	1.68788	1.56545	0.02435	0.145321	no
C1_10270C_A	C1_10270C_A	C1_10270C_A	SFH5	Ca22chr1A_C_albicans_SC5314:2267308-2268271	37Control	37	OK	32.2998	104.053	1.68773	1.70252	0.028	0.157851	no
C1_14160W_A	C1_14160W_A	C1_14160W_A	C1_14160W_A	Ca22chr1A_C_albicans_SC5314:3120933-3122688	37Control	37	OK	9.84969	31.7217	1.68732	2.02966	0.00595	0.0597697	no
C2_06850W_A	C2_06850W_A	C2_06850W_A	C2_06850W_A	Ca22chr2A_C_albicans_SC5314:1404232-1404912	37Control	37	OK	34.0315	109.6	1.68731	1.98862	0.00775	0.0703137	no
CR_03060W_A	CR_03060W_A	CR_03060W_A	ARC1	Ca22chrRA_C_albicans_SC5314:698440-699550	37Control	37	OK	96.0105	309.163	1.6871	1.7311	0.02435	0.145321	no
CR_00080W_A	CR_00080W_A	CR_00080W_A	MIS12	Ca22chrRA_C_albicans_SC5314:21384-24462	37Control	37	OK	29.1704	93.9277	1.68704	1.89501	0.0113	0.0899558	no
C5_00650C_A	C5_00650C_A	C5_00650C_A	THR1	Ca22chr5A_C_albicans_SC5314:146705-147779	37Control	37	OK	50.3119	161.929	1.68639	2.03751	0.0038	0.0460869	yes
C4_06110C_A	C4_06110C_A	C4_06110C_A	TRP5	Ca22chr4A_C_albicans_SC5314:1357946-1360055	37Control	37	OK	48.4611	155.704	1.68391	1.90992	0.01075	0.0869743	no
C4_01260W_A	C4_01260W_A	C4_01260W_A	RLM1	Ca22chr4A_C_albicans_SC5314:253001-254807	37Control	37	OK	7.66465	24.6255	1.68386	1.99103	0.0064	0.0623289	no
C5_02130W_A	C5_02130W_A	C5_02130W_A	C5_02130W_A	Ca22chr5A_C_albicans_SC5314:474333-476817	37Control	37	OK	18.9441	60.7999	1.68232	0.894287	0.22505	0.554964	no
C3_07180C_A	C3_07180C_A	C3_07180C_A	BMT1	Ca22chr3A_C_albicans_SC5314:1643661-1645716	37Control	37	OK	4.62948	14.8515	1.68169	1.84177	0.0125	0.0959794	no
C6_02230W_A	C6_02230W_A	C6_02230W_A	C6_02230W_A	Ca22chr6A_C_albicans_SC5314:463057-465112	37Control	37	OK	31.3122	100.445	1.68161	2.02505	0.00405	0.0479157	yes
C3_02470C_A	C3_02470C_A	C3_02470C_A	RPL9B	Ca22chr3A_C_albicans_SC5314:538835-539411	37Control	37	OK	1541.46	4943.25	1.68117	1.38621	0.06175	0.255057	no
C1_05530C_A	C1_05530C_A	C1_05530C_A	SSH1	Ca22chr1A_C_albicans_SC5314:1161280-1162890	37Control	37	OK	45.182	144.756	1.6798	2.02838	0.0042	0.0484724	yes
C4_05250W_A	C4_05250W_A	C4_05250W_A	C4_05250W_A	Ca22chr4A_C_albicans_SC5314:1139060-1139768	37Control	37	OK	19.805	63.4256	1.6792	1.96219	0.00475	0.0522278	no
C5_00280C_A	C5_00280C_A	C5_00280C_A	C5_00280C_A	Ca22chr5A_C_albicans_SC5314:46403-47366	37Control	37	OK	57.005	182.551	1.67914	2.09532	0.0019	0.0296001	yes
CR_04810W_A	CR_04810W_A	CR_04810W_A	RPS3	Ca22chrRA_C_albicans_SC5314:1040989-1041745	37Control	37	OK	1259.4	4032.88	1.67908	1.36866	0.0552	0.238571	no
C7_02340C_A	C7_02340C_A	C7_02340C_A	C7_02340C_A	Ca22chr7A_C_albicans_SC5314:510338-511619	37Control	37	OK	25.1646	80.4014	1.67583	2.0904	0.00545	0.0566818	no
C1_09720W_A	C1_09720W_A	C1_09720W_A	URA1	Ca22chr1A_C_albicans_SC5314:2136909-2138244	37Control	37	OK	100.051	319.505	1.6751	1.53377	0.0486	0.220787	no
C6_00650C_A	C6_00650C_A	C6_00650C_A	RPS13	Ca22chr6A_C_albicans_SC5314:114675-115535	37Control	37	OK	1763.77	5622.93	1.67266	1.36282	0.0705	0.27572	no
C2_03950W_A	C2_03950W_A	C2_03950W_A	C2_03950W_A	Ca22chr2A_C_albicans_SC5314:830389-831187	37Control	37	OK	89	283.431	1.67112	2.03782	0.0054	0.056505	no
C5_01580C_A	C5_01580C_A	C5_01580C_A	CEF3	Ca22chr5A_C_albicans_SC5314:347885-351038	37Control	37	OK	260.227	827.501	1.66899	1.36775	0.06045	0.252009	no
C6_04240W_A	C6_04240W_A	C6_04240W_A	C6_04240W_A	Ca22chr6A_C_albicans_SC5314:935981-936497	37Control	37	OK	29.7315	94.1931	1.66363	1.93007	0.0052	0.0553032	no
C7_04340C_A	C7_04340C_A	C7_04340C_A	C7_04340C_A	Ca22chr7A_C_albicans_SC5314:942018-942219	37Control	37	OK	31.7384	100.55	1.6636	1.19054	0.1205	0.383641	no
CR_10550W_A	CR_10550W_A	CR_10550W_A	DRS1	Ca22chrRA_C_albicans_SC5314:2240733-2242575	37Control	37	OK	34.1367	108.126	1.66332	2.03319	0.0055	0.0570443	no
C2_10640C_A	C2_10640C_A	C2_10640C_A	MTR2	Ca22chr2A_C_albicans_SC5314:2192387-2192990	37Control	37	OK	54.9299	173.565	1.65982	2.05127	0.00525	0.0557092	no
C2_00060C_A	C2_00060C_A	C2_00060C_A	C2_00060C_A	Ca22chr2A_C_albicans_SC5314:8143-9289	37Control	37	OK	33.7655	106.652	1.65929	2.02515	0.0051	0.0544858	no
C7_03400C_A	C7_03400C_A	C7_03400C_A	C7_03400C_A	Ca22chr7A_C_albicans_SC5314:745807-748996	37Control	37	OK	13.9773	44.0853	1.65722	2.00171	0.0068	0.0646206	no
C1_01380C_A	C1_01380C_A	C1_01380C_A	TRM2	Ca22chr1A_C_albicans_SC5314:270318-271974	37Control	37	OK	21.7619	68.5239	1.6548	2.09707	0.00335	0.0426045	yes
C4_07110C_A	C4_07110C_A	C4_07110C_A	PDA1	Ca22chr4A_C_albicans_SC5314:1574154-1575360	37Control	37	OK	411.754	1296.33	1.65458	1.3174	0.0538	0.235602	no
C1_03090W_A	C1_03090W_A	C1_03090W_A	RPS1	Ca22chr1A_C_albicans_SC5314:643225-643996	37Control	37	OK	2006.9	6312.99	1.65335	1.29594	0.0472	0.216974	no
C2_02540W_A	C2_02540W_A	C2_02540W_A	C2_02540W_A	Ca22chr2A_C_albicans_SC5314:509370-514539	37Control	37	OK	14.0346	44.1298	1.65277	1.96918	0.0041	0.0479351	yes
C1_13830C_A	C1_13830C_A	C1_13830C_A	PDX1	Ca22chr1A_C_albicans_SC5314:3038899-3040153	37Control	37	OK	109.122	342.252	1.64912	1.68538	0.0253	0.148589	no
CR_06230W_A	CR_06230W_A	CR_06230W_A	CR_06230W_A	Ca22chrRA_C_albicans_SC5314:1326328-1328179	37Control	37	OK	15.6835	49.1166	1.64697	1.94218	0.0089	0.0764394	no
C2_05710C_A	C2_05710C_A	C2_05710C_A	C2_05710C_A	Ca22chr2A_C_albicans_SC5314:1167164-1167944	37Control	37	OK	3813.62	11940.6	1.64665	1.35103	0.07265	0.28173	no
C3_06100C_A	C3_06100C_A	C3_06100C_A	DED1	Ca22chr3A_C_albicans_SC5314:1387873-1389892	37Control	37	OK	76.1165	238.218	1.646	1.43679	0.0632	0.258664	no
C1_12380C_A	C1_12380C_A	C1_12380C_A	WRS1	Ca22chr1A_C_albicans_SC5314:2696432-2697707	37Control	37	OK	50.6501	158.49	1.64576	2.02526	0.0054	0.056505	no
C3_04380C_A	C3_04380C_A	C3_04380C_A	C3_04380C_A	Ca22chr3A_C_albicans_SC5314:911154-911535	37Control	37	OK	741.924	2321.5	1.64572	1.6174	0.0335	0.175514	no
C6_01700W_A	C6_01700W_A	C6_01700W_A	RPL32	Ca22chr6A_C_albicans_SC5314:356944-357782	37Control	37	OK	3256.5	10173.3	1.6434	1.33777	0.05675	0.241939	no
C4_00160C_A	C4_00160C_A	C4_00160C_A	CAR2	Ca22chr4A_C_albicans_SC5314:25875-27186	37Control	37	OK	157.111	490.244	1.64171	1.66213	0.02515	0.147847	no
C4_01100C_A	C4_01100C_A	C4_01100C_A	AGP2	Ca22chr4A_C_albicans_SC5314:223818-225525	37Control	37	OK	41.5311	129.269	1.63811	1.82647	0.014	0.102803	no
C4_02870C_A	C4_02870C_A	C4_02870C_A	ZUO1	Ca22chr4A_C_albicans_SC5314:595984-597268	37Control	37	OK	136.363	423.44	1.63471	1.62265	0.0293	0.162409	no
C3_03070W_A	C3_03070W_A	C3_03070W_A	C3_03070W_A	Ca22chr3A_C_albicans_SC5314:652781-654299	37Control	37	OK	13.9252	43.2246	1.63416	2.02477	0.00425	0.04884	yes
C1_14450C_A	C1_14450C_A	C1_14450C_A	C1_14450C_A	Ca22chr1A_C_albicans_SC5314:3173043-3174396	37Control	37	OK	25.6979	79.6941	1.63282	2.02133	0.00675	0.0643402	no
C4_04220W_A	C4_04220W_A	C4_04220W_A	DUO1	Ca22chr4A_C_albicans_SC5314:902113-902629	37Control	37	OK	18.2113	56.461	1.63242	1.74325	0.0139	0.102428	no
C3_03650W_A	C3_03650W_A	C3_03650W_A	HBR3	Ca22chr3A_C_albicans_SC5314:770430-771831	37Control	37	OK	42.5901	131.714	1.62882	1.96441	0.0062	0.0613647	no
C1_08870C_A	C1_08870C_A	C1_08870C_A	JIP5	Ca22chr1A_C_albicans_SC5314:1928993-1930622	37Control	37	OK	24.3663	75.3312	1.62836	2.03085	0.0056	0.0576372	no
C4_07170C_A	C4_07170C_A	C4_07170C_A	C4_07170C_A	Ca22chr4A_C_albicans_SC5314:1584703-1584946	37Control	37	OK	91.6964	283.488	1.62835	1.70646	0.01365	0.101299	no
C6_03110C_A	C6_03110C_A	C6_03110C_A	C6_03110C_A	Ca22chr6A_C_albicans_SC5314:653803-654937	37Control	37	OK	7.28747	22.5088	1.627	1.81339	0.01175	0.092213	no
CR_02030C_A	CR_02030C_A	CR_02030C_A	CR_02030C_A	Ca22chrRA_C_albicans_SC5314:445206-446703	37Control	37	OK	14.9238	46.0586	1.62585	1.98081	0.00645	0.0626861	no
C7_01170C_A	C7_01170C_A	C7_01170C_A	C7_01170C_A	Ca22chr7A_C_albicans_SC5314:246115-247258	37Control	37	OK	28.6222	88.3129	1.62549	1.63555	0.01845	0.121889	no
C5_04570C_A	C5_04570C_A	C5_04570C_A	URA7	Ca22chr5A_C_albicans_SC5314:993707-995429	37Control	37	OK	72.2841	222.792	1.62395	1.7886	0.0121	0.0939034	no
C1_03840W_A	C1_03840W_A	C1_03840W_A	C1_03840W_A	Ca22chr1A_C_albicans_SC5314:804197-804467	37Control	37	OK	53.16	163.833	1.62381	1.58731	0.0336	0.175842	no
C1_05500W_A	C1_05500W_A	C1_05500W_A	RSM22	Ca22chr1A_C_albicans_SC5314:1152768-1155042	37Control	37	OK	14.891	45.8752	1.62328	1.80543	0.01695	0.116261	no
C4_03840C_A	C4_03840C_A	C4_03840C_A	RRP42	Ca22chr4A_C_albicans_SC5314:816381-817305	37Control	37	OK	25.5076	78.5709	1.62307	2.03699	0.00305	0.0399769	yes
CR_05790C_A	CR_05790C_A	CR_05790C_A	ACO2	Ca22chrRA_C_albicans_SC5314:1225927-1228303	37Control	37	OK	30.6844	94.5116	1.62299	1.93157	0.0049	0.0531327	no
C2_03960W_A	C2_03960W_A	C2_03960W_A	RPL39	Ca22chr2A_C_albicans_SC5314:831557-832282	37Control	37	OK	3801.94	11689.8	1.62044	1.39337	0.05655	0.241578	no
C1_05630C_A	C1_05630C_A	C1_05630C_A	C1_05630C_A	Ca22chr1A_C_albicans_SC5314:1177542-1180872	37Control	37	OK	79.6053	244.434	1.61851	1.52222	0.0324	0.172486	no
C5_01610W_A	C5_01610W_A	C5_01610W_A	C5_01610W_A	Ca22chr5A_C_albicans_SC5314:357143-358613	37Control	37	OK	22.257	68.3182	1.61801	2.00325	0.00705	0.0659974	no
C6_01970C_A	C6_01970C_A	C6_01970C_A	RPL25	Ca22chr6A_C_albicans_SC5314:402752-403626	37Control	37	OK	3511.58	10772.1	1.61711	1.28177	0.05585	0.239949	no
C2_08530C_A	C2_08530C_A	C2_08530C_A	C2_08530C_A	Ca22chr2A_C_albicans_SC5314:1724225-1726340	37Control	37	OK	4.72394	14.4782	1.61582	1.76525	0.01505	0.108111	no
CR_04240C_A	CR_04240C_A	CR_04240C_A	CR_04240C_A	Ca22chrRA_C_albicans_SC5314:948341-951470	37Control	37	OK	23.2899	71.303	1.61426	1.91011	0.00765	0.0698438	no
C7_02060W_A	C7_02060W_A	C7_02060W_A	LIG1	Ca22chr7A_C_albicans_SC5314:458218-460717	37Control	37	OK	15.276	46.7304	1.6131	2.05923	0.00385	0.0463057	yes
C1_06800W_A	C1_06800W_A	C1_06800W_A	C1_06800W_A	Ca22chr1A_C_albicans_SC5314:1450583-1451759	37Control	37	OK	27.6283	84.4982	1.61277	2.00982	0.0063	0.061738	no
C6_02290C_A	C6_02290C_A	C6_02290C_A	C6_02290C_A	Ca22chr6A_C_albicans_SC5314:475631-478013	37Control	37	OK	14.1283	43.1605	1.61112	1.85445	0.0134	0.100115	no
C3_06370C_A	C3_06370C_A	C3_06370C_A	C3_06370C_A	Ca22chr3A_C_albicans_SC5314:1455628-1456801	37Control	37	OK	53.4668	163.219	1.6101	1.95711	0.0065	0.0629771	no
CR_06330C_A	CR_06330C_A	CR_06330C_A	CR_06330C_A	Ca22chrRA_C_albicans_SC5314:1342339-1342891	37Control	37	OK	64.8943	198.012	1.60943	2.05307	0.00435	0.0494461	yes
C2_08480W_A	C2_08480W_A	C2_08480W_A	RRP8	Ca22chr2A_C_albicans_SC5314:1712467-1713754	37Control	37	OK	36.8425	112.401	1.60922	2.02289	0.0033	0.0421679	yes
C1_11160C_A	C1_11160C_A	C1_11160C_A	C1_11160C_A	Ca22chr1A_C_albicans_SC5314:2452097-2452403	37Control	37	OK	131.984	402.048	1.60701	1.91003	0.00965	0.0806379	no
C6_03470W_A	C6_03470W_A	C6_03470W_A	C6_03470W_A	Ca22chr6A_C_albicans_SC5314:737335-739201	37Control	37	OK	15.1804	46.1886	1.60533	1.97786	0.00565	0.0579302	no
C7_01790C_A	C7_01790C_A	C7_01790C_A	RPL5	Ca22chr7A_C_albicans_SC5314:384486-385383	37Control	37	OK	1250.58	3803.2	1.60462	1.29001	0.06045	0.252009	no
C6_04320C_A	C6_04320C_A	C6_04320C_A	C6_04320C_A	Ca22chr6A_C_albicans_SC5314:954378-954726	37Control	37	OK	12.2474	37.2288	1.60394	1.47773	0.0307	0.16683	no
C5_02710W_A	C5_02710W_A	C5_02710W_A	TRR1	Ca22chr5A_C_albicans_SC5314:611322-612285	37Control	37	OK	121.262	368.574	1.60383	1.64792	0.03055	0.16664	no
C3_07400W_A	C3_07400W_A	C3_07400W_A	C3_07400W_A	Ca22chr3A_C_albicans_SC5314:1696235-1697117	37Control	37	OK	50.0763	151.729	1.5993	1.93317	0.0088	0.0759963	no
C3_05340W_A	C3_05340W_A	C3_05340W_A	DIE2	Ca22chr3A_C_albicans_SC5314:1183238-1184501	37Control	37	OK	2.55503	7.73183	1.59747	1.51995	0.0398	0.195065	no
C2_06920C_A	C2_06920C_A	C2_06920C_A	C2_06920C_A	Ca22chr2A_C_albicans_SC5314:1418390-1419161	37Control	37	OK	55.2167	167.001	1.59668	1.89485	0.0049	0.0531327	no
CR_09350C_A	CR_09350C_A	CR_09350C_A	CR_09350C_A	Ca22chrRA_C_albicans_SC5314:1982020-1982734	37Control	37	OK	2.40946	7.28306	1.59583	1.20683	0.09455	0.331259	no
C3_07650C_A	C3_07650C_A	C3_07650C_A	C3_07650C_A	Ca22chr3A_C_albicans_SC5314:1743424-1745305	37Control	37	OK	10.3019	31.1053	1.59425	1.95338	0.00435	0.0494461	yes
C4_07150W_A	C4_07150W_A	C4_07150W_A	C4_07150W_A	Ca22chr4A_C_albicans_SC5314:1583825-1584365	37Control	37	OK	45.1778	136.382	1.59397	1.93184	0.008	0.071616	no
C4_03390W_A	C4_03390W_A	C4_03390W_A	CSH3	Ca22chr4A_C_albicans_SC5314:710439-711150	37Control	37	OK	97.5955	294.285	1.59233	1.81667	0.01535	0.109101	no
CR_00810W_A	CR_00810W_A	CR_00810W_A	CR_00810W_A	Ca22chrRA_C_albicans_SC5314:189236-189632	37Control	37	OK	52.3651	157.899	1.59232	1.86094	0.00925	0.0785499	no
C4_04480C_A	C4_04480C_A	C4_04480C_A	EFB1	Ca22chr4A_C_albicans_SC5314:962660-963667	37Control	37	OK	1128.89	3395.46	1.5887	1.23689	0.06845	0.271308	no
C1_00180W_A	C1_00180W_A	C1_00180W_A	RPL16A	Ca22chr1A_C_albicans_SC5314:31841-32444	37Control	37	OK	2316.35	6959.13	1.58706	1.26217	0.0587	0.246844	no
C1_10390C_A	C1_10390C_A	C1_10390C_A	RPL42	Ca22chr1A_C_albicans_SC5314:2299891-2300570	37Control	37	OK	5062.79	15209.1	1.58693	1.28888	0.06565	0.264157	no
C3_02020W_A	C3_02020W_A	C3_02020W_A	C3_02020W_A	Ca22chr3A_C_albicans_SC5314:442843-445369	37Control	37	OK	24.3511	73.1497	1.58687	1.9405	0.0069	0.0650458	no
C2_10860C_A	C2_10860C_A	C2_10860C_A	C2_10860C_A	Ca22chr2A_C_albicans_SC5314:2225779-2226865	37Control	37	OK	99.0968	296.808	1.58262	1.62593	0.02625	0.152269	no
CR_05450C_A	CR_05450C_A	CR_05450C_A	CR_05450C_A	Ca22chrRA_C_albicans_SC5314:1162652-1163300	37Control	37	OK	34.9625	104.684	1.58216	1.85702	0.01285	0.0974747	no
C1_03240W_A	C1_03240W_A	C1_03240W_A	C1_03240W_A	Ca22chr1A_C_albicans_SC5314:679784-680210	37Control	37	OK	139.409	417.117	1.58113	1.88219	0.0094	0.0793586	no
C4_03140C_A	C4_03140C_A	C4_03140C_A	C4_03140C_A	Ca22chr4A_C_albicans_SC5314:659488-660385	37Control	37	OK	31.9227	95.4517	1.58019	2.0142	0.00395	0.0469983	yes
C2_01060C_A	C2_01060C_A	C2_01060C_A	C2_01060C_A	Ca22chr2A_C_albicans_SC5314:173924-174374	37Control	37	OK	55.7557	166.689	1.57997	1.85768	0.0097	0.0809121	no
C2_05520W_A	C2_05520W_A	C2_05520W_A	C2_05520W_A	Ca22chr2A_C_albicans_SC5314:1125204-1126004	37Control	37	OK	34.6214	103.424	1.57883	2.00382	0.0051	0.0544858	no
CR_08480C_A	CR_08480C_A	CR_08480C_A	CR_08480C_A	Ca22chrRA_C_albicans_SC5314:1831038-1831209	37Control	37	OK	10539.1	31478.5	1.57861	1.53905	0.0246	0.146072	no
C1_12390C_A	C1_12390C_A	C1_12390C_A	RPL27A	Ca22chr1A_C_albicans_SC5314:2698187-2699014	37Control	37	OK	2457.22	7319.58	1.57473	1.29604	0.078	0.295006	no
C4_00730C_A	C4_00730C_A	C4_00730C_A	C4_00730C_A	Ca22chr4A_C_albicans_SC5314:125250-125643	37Control	37	OK	8.19879	24.4047	1.57368	1.35511	0.05145	0.229309	no
C2_05420C_A	C2_05420C_A	C2_05420C_A	C2_05420C_A	Ca22chr2A_C_albicans_SC5314:1111556-1111675	37Control	37	OK	306.563	911.311	1.57176	1.22327	0.1023	0.347488	no
C4_01270W_A	C4_01270W_A	C4_01270W_A	RPS6A	Ca22chr4A_C_albicans_SC5314:255597-256733	37Control	37	OK	2155.71	6395.15	1.56882	1.22573	0.05995	0.250534	no
C4_02980W_A	C4_02980W_A	C4_02980W_A	TYS1	Ca22chr4A_C_albicans_SC5314:621465-622695	37Control	37	OK	114.119	338.184	1.56726	1.72233	0.0119	0.0930027	no
C3_07560W_A	C3_07560W_A	C3_07560W_A	TCC1	Ca22chr3A_C_albicans_SC5314:1729948-1732195	37Control	37	OK	23.7164	70.2455	1.56652	1.86752	0.00675	0.0643402	no
CR_08020C_A	CR_08020C_A	CR_08020C_A	NOP10	Ca22chrRA_C_albicans_SC5314:1752666-1752846	37Control	37	OK	2532.38	7480.85	1.56271	1.91094	0.0089	0.0764394	no
C7_00960W_A	C7_00960W_A	C7_00960W_A	RPS18	Ca22chr7A_C_albicans_SC5314:202216-203082	37Control	37	OK	3287.25	9710	1.56259	1.25885	0.06605	0.265369	no
C4_03270W_A	C4_03270W_A	C4_03270W_A	RPF1	Ca22chr4A_C_albicans_SC5314:680861-681752	37Control	37	OK	99.3893	293.435	1.56188	1.85312	0.0106	0.0860194	no
C2_06110W_A	C2_06110W_A	C2_06110W_A	C2_06110W_A	Ca22chr2A_C_albicans_SC5314:1248592-1249798	37Control	37	OK	25.0077	73.7457	1.56019	1.84505	0.01345	0.100329	no
C2_03450W_A	C2_03450W_A	C2_03450W_A	C2_03450W_A	Ca22chr2A_C_albicans_SC5314:720616-721876	37Control	37	OK	17.0759	50.2668	1.55764	1.96706	0.0048	0.0524713	no
C3_04900W_A	C3_04900W_A	C3_04900W_A	NOP14	Ca22chr3A_C_albicans_SC5314:1052735-1055264	37Control	37	OK	23.3441	68.6173	1.55551	1.84675	0.0061	0.0606939	no
C1_07950C_A	C1_07950C_A	C1_07950C_A	C1_07950C_A	Ca22chr1A_C_albicans_SC5314:1729609-1730410	37Control	37	OK	39.8398	117.005	1.55429	1.93929	0.01005	0.0830227	no
C5_02280C_A	C5_02280C_A	C5_02280C_A	C5_02280C_A	Ca22chr5A_C_albicans_SC5314:504891-506283	37Control	37	OK	24.5746	72.0683	1.5522	1.92883	0.00965	0.0806379	no
C1_02350W_A	C1_02350W_A	C1_02350W_A	TIM21	Ca22chr1A_C_albicans_SC5314:489331-490138	37Control	37	OK	38.1714	111.914	1.55182	1.92757	0.00905	0.0772696	no
C2_09060C_A	C2_09060C_A	C2_09060C_A	ASN1	Ca22chr2A_C_albicans_SC5314:1851748-1853470	37Control	37	OK	181.479	531.805	1.55109	1.45738	0.03255	0.172893	no
C6_04330W_A	C6_04330W_A	C6_04330W_A	NOP8	Ca22chr6A_C_albicans_SC5314:954953-957020	37Control	37	OK	16.9801	49.741	1.55059	1.9455	0.00535	0.0562946	no
C2_06890C_A	C2_06890C_A	C2_06890C_A	C2_06890C_A	Ca22chr2A_C_albicans_SC5314:1415602-1416562	37Control	37	OK	37.7967	110.685	1.55013	1.61768	0.0335	0.175514	no
C1_10670C_A	C1_10670C_A	C1_10670C_A	RPA190	Ca22chr1A_C_albicans_SC5314:2364209-2369207	37Control	37	OK	20.5425	60.1428	1.54978	1.76128	0.0191	0.124437	no
C7_01970C_A	C7_01970C_A	C7_01970C_A	TOM40	Ca22chr7A_C_albicans_SC5314:422228-423401	37Control	37	OK	183.271	535.739	1.54756	1.56574	0.03385	0.176758	no
C3_00410C_A	C3_00410C_A	C3_00410C_A	C3_00410C_A	Ca22chr3A_C_albicans_SC5314:59697-62410	37Control	37	OK	5.38305	15.6793	1.54236	0.409127	0.53935	0.847677	no
C7_00620W_A	C7_00620W_A	C7_00620W_A	GUS1	Ca22chr7A_C_albicans_SC5314:101628-103806	37Control	37	OK	69.6849	202.938	1.54212	1.57058	0.0297	0.163615	no
C2_02680W_A	C2_02680W_A	C2_02680W_A	PDR17	Ca22chr2A_C_albicans_SC5314:537501-538596	37Control	37	OK	37.0376	107.848	1.54194	1.94333	0.0047	0.0519205	no
C5_02120C_A	C5_02120C_A	C5_02120C_A	RIX7	Ca22chr5A_C_albicans_SC5314:474333-476817	37Control	37	OK	11.1676	32.5185	1.54194	1.71444	0.0136	0.101048	no
C2_05410W_A	C2_05410W_A	C2_05410W_A	C2_05410W_A	Ca22chr2A_C_albicans_SC5314:1110393-1111214	37Control	37	OK	3482.63	10134.3	1.54099	1.26387	0.0873	0.315483	no
C3_00720W_A	C3_00720W_A	C3_00720W_A	PMA1	Ca22chr3A_C_albicans_SC5314:133118-135806	37Control	37	OK	49.6167	144.162	1.53879	1.66843	0.01425	0.104152	no
C2_03090C_A	C2_03090C_A	C2_03090C_A	ADE8	Ca22chr2A_C_albicans_SC5314:622121-622790	37Control	37	OK	127.741	371.093	1.53855	1.86193	0.008	0.071616	no
C3_07950C_A	C3_07950C_A	C3_07950C_A	SRB1	Ca22chr3A_C_albicans_SC5314:1785088-1786177	37Control	37	OK	434.677	1257.31	1.53233	1.24869	0.05125	0.228688	no
C2_02590W_A	C2_02590W_A	C2_02590W_A	ZRT2	Ca22chr2A_C_albicans_SC5314:524003-525116	37Control	37	OK	56.6599	163.853	1.532	1.71807	0.02195	0.136355	no
CR_03370C_A	CR_03370C_A	CR_03370C_A	KTI12	Ca22chrRA_C_albicans_SC5314:749201-750068	37Control	37	OK	37.4554	108.155	1.52986	1.91155	0.01	0.0826822	no
CR_03660C_A	CR_03660C_A	CR_03660C_A	CR_03660C_A	Ca22chrRA_C_albicans_SC5314:812989-814756	37Control	37	OK	16.044	46.3258	1.52978	1.83186	0.01265	0.0966583	no
C7_03350C_A	C7_03350C_A	C7_03350C_A	C7_03350C_A	Ca22chr7A_C_albicans_SC5314:738907-739837	37Control	37	OK	14.8926	42.9629	1.5285	1.62884	0.0244	0.145527	no
C1_09820C_A	C1_09820C_A	C1_09820C_A	C1_09820C_A	Ca22chr1A_C_albicans_SC5314:2148117-2149359	37Control	37	OK	33.6739	97.1206	1.52815	1.12595	0.1197	0.382127	no
C4_06450W_A	C4_06450W_A	C4_06450W_A	C4_06450W_A	Ca22chr4A_C_albicans_SC5314:1433542-1433956	37Control	37	OK	26.6877	76.7337	1.52368	1.65635	0.01815	0.120541	no
C3_00420W_A	C3_00420W_A	C3_00420W_A	C3_00420W_A	Ca22chr3A_C_albicans_SC5314:59697-62410	37Control	37	OK	17.0345	48.9735	1.52354	1.88997	0.00535	0.0562946	no
C6_04610C_A	C6_04610C_A	C6_04610C_A	NAG3	Ca22chr6A_C_albicans_SC5314:1023236-1024922	37Control	37	OK	11.786	33.8472	1.52196	1.86118	0.0089	0.0764394	no
C1_10950C_A	C1_10950C_A	C1_10950C_A	C1_10950C_A	Ca22chr1A_C_albicans_SC5314:2416728-2418210	37Control	37	OK	34.8129	99.9334	1.52135	1.82964	0.00785	0.0707778	no
C2_08180C_A	C2_08180C_A	C2_08180C_A	C2_08180C_A	Ca22chr2A_C_albicans_SC5314:1658531-1659985	37Control	37	OK	32.5769	93.5013	1.52114	1.92241	0.0056	0.0576372	no
CR_02700W_A	CR_02700W_A	CR_02700W_A	CR_02700W_A	Ca22chrRA_C_albicans_SC5314:619999-620383	37Control	37	OK	78.5395	225.411	1.52107	1.78644	0.01555	0.109859	no
C4_00530C_A	C4_00530C_A	C4_00530C_A	C4_00530C_A	Ca22chr4A_C_albicans_SC5314:91404-92481	37Control	37	OK	2.18401	6.26107	1.51943	1.18408	0.09605	0.334512	no
C2_08800C_A	C2_08800C_A	C2_08800C_A	APE3	Ca22chr2A_C_albicans_SC5314:1787950-1789603	37Control	37	OK	26.4209	75.6954	1.51853	1.74538	0.01645	0.114162	no
C2_05670C_A	C2_05670C_A	C2_05670C_A	C2_05670C_A	Ca22chr2A_C_albicans_SC5314:1160139-1160940	37Control	37	OK	29.4404	84.2955	1.51766	1.90884	0.00545	0.0566818	no
C2_07300C_A	C2_07300C_A	C2_07300C_A	RPA12	Ca22chr2A_C_albicans_SC5314:1485600-1485972	37Control	37	OK	128.102	366.405	1.51614	1.92511	0.0053	0.0560817	no
C7_00710W_A	C7_00710W_A	C7_00710W_A	RPS28B	Ca22chr7A_C_albicans_SC5314:131584-131860	37Control	37	OK	8609.94	24602.1	1.51471	1.27173	0.08915	0.318925	no
C5_03530C_A	C5_03530C_A	C5_03530C_A	C5_03530C_A	Ca22chr5A_C_albicans_SC5314:792459-793005	37Control	37	OK	44.6729	127.584	1.51397	1.7657	0.0139	0.102428	no
CR_07030C_A	CR_07030C_A	CR_07030C_A	CR_07030C_A	Ca22chrRA_C_albicans_SC5314:1511407-1512253	37Control	37	OK	40.0848	114.439	1.51345	1.92956	0.00585	0.059112	no
C1_12350W_A	C1_12350W_A	C1_12350W_A	C1_12350W_A	Ca22chr1A_C_albicans_SC5314:2690711-2693726	37Control	37	OK	20.5325	58.6096	1.51323	1.8456	0.01145	0.0907663	no
C6_02420W_A	C6_02420W_A	C6_02420W_A	C6_02420W_A	Ca22chr6A_C_albicans_SC5314:501488-502706	37Control	37	OK	38.0945	108.616	1.51158	1.58615	0.0339	0.17697	no
C2_04310W_A	C2_04310W_A	C2_04310W_A	ERG10	Ca22chr2A_C_albicans_SC5314:902491-903700	37Control	37	OK	179.638	511.848	1.51063	1.33225	0.0573	0.243347	no
C5_04720C_A	C5_04720C_A	C5_04720C_A	C5_04720C_A	Ca22chr5A_C_albicans_SC5314:1024373-1025190	37Control	37	OK	45.4331	129.357	1.50954	1.86008	0.0085	0.0742912	no
C1_11990W_A	C1_11990W_A	C1_11990W_A	C1_11990W_A	Ca22chr1A_C_albicans_SC5314:2623917-2624403	37Control	37	OK	59.8724	170.15	1.50684	1.67068	0.0189	0.123519	no
C6_02380W_A	C6_02380W_A	C6_02380W_A	C6_02380W_A	Ca22chr6A_C_albicans_SC5314:496004-497672	37Control	37	OK	71.5289	202.865	1.50392	1.70467	0.02135	0.133464	no
C4_07180W_A	C4_07180W_A	C4_07180W_A	UBI3	Ca22chr4A_C_albicans_SC5314:1585322-1585904	37Control	37	OK	3512.26	9959.68	1.5037	1.07099	0.1177	0.378501	no
C2_02450C_A	C2_02450C_A	C2_02450C_A	UTP22	Ca22chr2A_C_albicans_SC5314:487814-491342	37Control	37	OK	22.4828	63.7005	1.50248	1.78044	0.00925	0.0785499	no
C3_07700W_A	C3_07700W_A	C3_07700W_A	C3_07700W_A	Ca22chr3A_C_albicans_SC5314:1754844-1755624	37Control	37	OK	61.2447	173.457	1.50192	1.82294	0.01215	0.0941363	no
C1_06900C_A	C1_06900C_A	C1_06900C_A	MMD1	Ca22chr1A_C_albicans_SC5314:1469636-1470274	37Control	37	OK	543.886	1539.69	1.50127	1.309	0.0621	0.255998	no
C3_02840W_A	C3_02840W_A	C3_02840W_A	C3_02840W_A	Ca22chr3A_C_albicans_SC5314:615472-617427	37Control	37	OK	18.7988	53.1676	1.49991	0.867203	0.2341	0.567255	no
C1_09890C_A	C1_09890C_A	C1_09890C_A	tS%28CGA%291	Ca22chr1A_C_albicans_SC5314:2164156-2164251	37Control	37	OK	6.97389	19.7206	1.49967	15.4618	0.5424	0.849666	no
C2_09430W_A	C2_09430W_A	C2_09430W_A	RPL3	Ca22chr2A_C_albicans_SC5314:1921831-1923001	37Control	37	OK	1154.8	3265.29	1.49957	1.17447	0.07035	0.275591	no
C4_01520C_A	C4_01520C_A	C4_01520C_A	RPL20B	Ca22chr4A_C_albicans_SC5314:315672-316191	37Control	37	OK	1704.02	4816.65	1.49908	1.23195	0.09065	0.32215	no
C4_02270C_A	C4_02270C_A	C4_02270C_A	BFR1	Ca22chr4A_C_albicans_SC5314:447753-449142	37Control	37	OK	131.65	370.928	1.49443	1.45975	0.0338	0.176545	no
CR_05200C_A	CR_05200C_A	CR_05200C_A	CR_05200C_A	Ca22chrRA_C_albicans_SC5314:1124184-1124604	37Control	37	OK	188.52	531.14	1.49437	1.71501	0.0202	0.128536	no
C2_01050W_A	C2_01050W_A	C2_01050W_A	C2_01050W_A	Ca22chr2A_C_albicans_SC5314:173660-173918	37Control	37	OK	104.545	294.353	1.49343	1.60658	0.0274	0.155821	no
C3_06010W_A	C3_06010W_A	C3_06010W_A	CAM1	Ca22chr3A_C_albicans_SC5314:1366623-1368091	37Control	37	OK	375.061	1055.22	1.49234	1.24785	0.06395	0.260207	no
C7_01190W_A	C7_01190W_A	C7_01190W_A	C7_01190W_A	Ca22chr7A_C_albicans_SC5314:249859-250768	37Control	37	OK	20.3685	57.2601	1.49119	1.7589	0.0174	0.118015	no
C2_07420W_A	C2_07420W_A	C2_07420W_A	C2_07420W_A	Ca22chr2A_C_albicans_SC5314:1516378-1517101	37Control	37	OK	86.982	244.4	1.49046	1.69058	0.0173	0.117804	no
C3_06530W_A	C3_06530W_A	C3_06530W_A	C3_06530W_A	Ca22chr3A_C_albicans_SC5314:1492057-1492954	37Control	37	OK	17.5807	49.3839	1.49005	1.78112	0.0142	0.103907	no
C3_07580W_A	C3_07580W_A	C3_07580W_A	C3_07580W_A	Ca22chr3A_C_albicans_SC5314:1733432-1733702	37Control	37	OK	242.908	682.139	1.48966	1.75541	0.0119	0.0930027	no
C4_00820W_A	C4_00820W_A	C4_00820W_A	C4_00820W_A	Ca22chr4A_C_albicans_SC5314:146311-147412	37Control	37	OK	26.7506	75.0985	1.48921	1.85172	0.0113	0.0899558	no
C1_05730W_A	C1_05730W_A	C1_05730W_A	C1_05730W_A	Ca22chr1A_C_albicans_SC5314:1195170-1196708	37Control	37	OK	675.612	1895.4	1.48823	0.0325986	0.4084	0.7564	no
C2_10710W_A	C2_10710W_A	C2_10710W_A	TIF11	Ca22chr2A_C_albicans_SC5314:2202877-2203342	37Control	37	OK	557.637	1563.91	1.48776	1.48097	0.0463	0.21474	no
CR_08500W_A	CR_08500W_A	CR_08500W_A	CR_08500W_A	Ca22chrRA_C_albicans_SC5314:1835067-1836330	37Control	37	OK	51.2315	143.59	1.48685	1.78853	0.01385	0.10222	no
C6_02270C_A	C6_02270C_A	C6_02270C_A	ALG11	Ca22chr6A_C_albicans_SC5314:470963-472793	37Control	37	OK	16.8359	47.1825	1.48671	1.75004	0.01685	0.115871	no
C4_06760W_A	C4_06760W_A	C4_06760W_A	GUT2	Ca22chr4A_C_albicans_SC5314:1507096-1509049	37Control	37	OK	103.842	290.888	1.48607	1.49024	0.03955	0.194193	no
C6_03440W_A	C6_03440W_A	C6_03440W_A	C6_03440W_A	Ca22chr6A_C_albicans_SC5314:725373-727680	37Control	37	OK	13.3759	37.4446	1.48512	1.75867	0.0168	0.115738	no
C1_05720W_A	C1_05720W_A	C1_05720W_A	C1_05720W_A	Ca22chr1A_C_albicans_SC5314:1195170-1196708	37Control	37	OK	1412.35	3953.66	1.48509	1.20825	0.0981	0.339141	no
C2_04830W_A	C2_04830W_A	C2_04830W_A	C2_04830W_A	Ca22chr2A_C_albicans_SC5314:1010656-1011961	37Control	37	OK	9.0744	25.3807	1.48386	1.7169	0.0115	0.0910477	no
C5_02960C_A	C5_02960C_A	C5_02960C_A	C5_02960C_A	Ca22chr5A_C_albicans_SC5314:654929-655382	37Control	37	OK	1.66923	4.66505	1.48271	1.05217	0.1611	0.457182	no
C5_01480W_A	C5_01480W_A	C5_01480W_A	FYV5	Ca22chr5A_C_albicans_SC5314:330455-330884	37Control	37	OK	58.0849	162.074	1.48042	1.75403	0.0154	0.109374	no
C3_07550C_A	C3_07550C_A	C3_07550C_A	C3_07550C_A	Ca22chr3A_C_albicans_SC5314:1719338-1721228	37Control	37	OK	22.9163	63.7738	1.47659	1.73403	0.01325	0.0995468	no
C1_03870C_A	C1_03870C_A	C1_03870C_A	C1_03870C_A	Ca22chr1A_C_albicans_SC5314:813868-815560	37Control	37	OK	38.0443	105.76	1.47504	1.66259	0.02555	0.149359	no
C3_04140C_A	C3_04140C_A	C3_04140C_A	EGD2	Ca22chr3A_C_albicans_SC5314:865041-865578	37Control	37	OK	1021.5	2839.09	1.47475	1.25924	0.07085	0.276744	no
C2_02950W_A	C2_02950W_A	C2_02950W_A	C2_02950W_A	Ca22chr2A_C_albicans_SC5314:588151-589513	37Control	37	OK	1.24332	3.44777	1.47147	1.27767	0.06165	0.254756	no
C4_04700W_A	C4_04700W_A	C4_04700W_A	SSZ1	Ca22chr4A_C_albicans_SC5314:1007559-1009182	37Control	37	OK	207.797	576.144	1.47125	1.25135	0.0919	0.324936	no
C3_02320W_A	C3_02320W_A	C3_02320W_A	ILV2	Ca22chr3A_C_albicans_SC5314:507100-509152	37Control	37	OK	91.0614	252.452	1.4711	1.46539	0.0475	0.217468	no
C1_03180W_A	C1_03180W_A	C1_03180W_A	C1_03180W_A	Ca22chr1A_C_albicans_SC5314:660928-661792	37Control	37	OK	17.4247	48.2855	1.47045	1.73098	0.015	0.107834	no
CR_04800W_A	CR_04800W_A	CR_04800W_A	MNT4	Ca22chrRA_C_albicans_SC5314:1038241-1040401	37Control	37	OK	4.20476	11.6502	1.47026	1.61663	0.02515	0.147847	no
C2_00170C_A	C2_00170C_A	C2_00170C_A	C2_00170C_A	Ca22chr2A_C_albicans_SC5314:23502-24807	37Control	37	OK	40.0791	111.026	1.46998	1.86258	0.0058	0.0588594	no
C2_03820C_A	C2_03820C_A	C2_03820C_A	RPS9B	Ca22chr2A_C_albicans_SC5314:805678-806736	37Control	37	OK	2122.58	5878.11	1.46954	1.2113	0.0885	0.317504	no
C1_08000W_A	C1_08000W_A	C1_08000W_A	NRP1	Ca22chr1A_C_albicans_SC5314:1747218-1749510	37Control	37	OK	3.74959	10.3719	1.46788	1.5787	0.03335	0.175264	no
C4_05540W_A	C4_05540W_A	C4_05540W_A	HOM3	Ca22chr4A_C_albicans_SC5314:1210136-1211771	37Control	37	OK	40.8128	112.853	1.46735	1.7967	0.0133	0.0998826	no
C2_05890C_A	C2_05890C_A	C2_05890C_A	IDP1	Ca22chr2A_C_albicans_SC5314:1204412-1205714	37Control	37	OK	46.8767	129.575	1.46684	1.5277	0.0391	0.192536	no
C1_05000W_A	C1_05000W_A	C1_05000W_A	RHD1	Ca22chr1A_C_albicans_SC5314:1048308-1050273	37Control	37	OK	12.7941	35.279	1.46332	1.6635	0.0272	0.155246	no
C3_07750W_A	C3_07750W_A	C3_07750W_A	UTP9	Ca22chr3A_C_albicans_SC5314:1765305-1767562	37Control	37	OK	74.1905	204.448	1.46243	1.55238	0.0307	0.16683	no
C5_02660C_A	C5_02660C_A	C5_02660C_A	C5_02660C_A	Ca22chr5A_C_albicans_SC5314:600803-601811	37Control	37	OK	117.703	324.195	1.46172	1.64161	0.0283	0.158829	no
CR_10170C_A	CR_10170C_A	CR_10170C_A	CR_10170C_A	Ca22chrRA_C_albicans_SC5314:2174772-2176227	37Control	37	OK	31.3252	86.2329	1.46092	1.86283	0.007	0.0656926	no
C1_06280C_A	C1_06280C_A	C1_06280C_A	UME6	Ca22chr1A_C_albicans_SC5314:1314437-1316969	37Control	37	OK	2.24063	6.16117	1.4593	1.4555	0.0381	0.190197	no
C5_01010W_A	C5_01010W_A	C5_01010W_A	CCW14	Ca22chr5A_C_albicans_SC5314:221836-222652	37Control	37	OK	44.4695	122.07	1.45681	1.7563	0.01835	0.121441	no
C5_03400C_A	C5_03400C_A	C5_03400C_A	C5_03400C_A	Ca22chr5A_C_albicans_SC5314:767217-767744	37Control	37	OK	141.306	387.694	1.45609	1.81706	0.01435	0.104477	no
C3_04500C_A	C3_04500C_A	C3_04500C_A	RPL19A	Ca22chr3A_C_albicans_SC5314:941277-942286	37Control	37	OK	2707.57	7425.36	1.45546	1.15291	0.08065	0.30092	no
C1_06440C_A	C1_06440C_A	C1_06440C_A	C1_06440C_A	Ca22chr1A_C_albicans_SC5314:1372797-1375413	37Control	37	OK	12.5278	34.3564	1.45544	1.7902	0.0127	0.0967656	no
C3_05610W_A	C3_05610W_A	C3_05610W_A	MNN14	Ca22chr3A_C_albicans_SC5314:1254540-1256598	37Control	37	OK	10.2868	28.1951	1.45466	1.8126	0.01155	0.0912901	no
C2_07190C_A	C2_07190C_A	C2_07190C_A	C2_07190C_A	Ca22chr2A_C_albicans_SC5314:1467248-1467773	37Control	37	OK	237.82	651.286	1.45342	1.63026	0.02835	0.159015	no
C3_04960W_A	C3_04960W_A	C3_04960W_A	RPL35	Ca22chr3A_C_albicans_SC5314:1067837-1068640	37Control	37	OK	2686.94	7354.23	1.45261	1.17303	0.11385	0.371254	no
C6_02070C_A	C6_02070C_A	C6_02070C_A	RPL23A	Ca22chr6A_C_albicans_SC5314:424969-425898	37Control	37	OK	2675.99	7319.24	1.45162	1.17432	0.1079	0.359063	no
C5_03630C_A	C5_03630C_A	C5_03630C_A	C5_03630C_A	Ca22chr5A_C_albicans_SC5314:807683-809257	37Control	37	OK	26.5282	72.5155	1.45076	0.931985	0.1936	0.510279	no
C1_03600W_A	C1_03600W_A	C1_03600W_A	C1_03600W_A	Ca22chr1A_C_albicans_SC5314:749582-750410	37Control	37	OK	65.5819	178.841	1.44731	1.64459	0.0209	0.131656	no
C1_09810W_A	C1_09810W_A	C1_09810W_A	C1_09810W_A	Ca22chr1A_C_albicans_SC5314:2148117-2149359	37Control	37	OK	15.7334	42.8416	1.44518	1.46037	0.04285	0.204791	no
C1_03830C_A	C1_03830C_A	C1_03830C_A	C1_03830C_A	Ca22chr1A_C_albicans_SC5314:803001-803994	37Control	37	OK	34.8963	94.9938	1.44476	1.84771	0.0105	0.0856878	no
C1_08500C_A	C1_08500C_A	C1_08500C_A	ENO1	Ca22chr1A_C_albicans_SC5314:1864126-1865449	37Control	37	OK	3686.8	10029.6	1.44382	0.625304	0.3944	0.743189	no
C1_11450C_A	C1_11450C_A	C1_11450C_A	SAM2	Ca22chr1A_C_albicans_SC5314:2513458-2514616	37Control	37	OK	85.3837	232.1	1.44271	1.58102	0.02145	0.133911	no
C2_06770W_A	C2_06770W_A	C2_06770W_A	C2_06770W_A	Ca22chr2A_C_albicans_SC5314:1389018-1390239	37Control	37	OK	8.05478	21.8293	1.43835	1.51532	0.03245	0.172605	no
CR_02940C_A	CR_02940C_A	CR_02940C_A	CR_02940C_A	Ca22chrRA_C_albicans_SC5314:678886-679966	37Control	37	OK	12.3338	33.3981	1.43715	1.6858	0.0176	0.118731	no
C4_05400C_A	C4_05400C_A	C4_05400C_A	C4_05400C_A	Ca22chr4A_C_albicans_SC5314:1176256-1177441	37Control	37	OK	24.838	67.2511	1.43701	1.77081	0.01135	0.0902395	no
CR_04300W_A	CR_04300W_A	CR_04300W_A	CR_04300W_A	Ca22chrRA_C_albicans_SC5314:958466-960608	37Control	37	OK	45.6672	123.639	1.4369	1.6002	0.0301	0.165046	no
CR_02920C_A	CR_02920C_A	CR_02920C_A	AQY1	Ca22chrRA_C_albicans_SC5314:667780-668602	37Control	37	OK	169.429	458.61	1.43658	1.19826	0.1045	0.352292	no
C2_03130W_A	C2_03130W_A	C2_03130W_A	C2_03130W_A	Ca22chr2A_C_albicans_SC5314:633047-633668	37Control	37	OK	73.9718	200.118	1.43581	1.77593	0.016	0.112197	no
C2_01950C_A	C2_01950C_A	C2_01950C_A	AMN1	Ca22chr2A_C_albicans_SC5314:365020-366994	37Control	37	OK	4.01969	10.8737	1.43568	1.53114	0.0309	0.167627	no
C4_07160W_A	C4_07160W_A	C4_07160W_A	C4_07160W_A	Ca22chr4A_C_albicans_SC5314:1584492-1584672	37Control	37	OK	280.092	757.495	1.43533	1.50561	0.03015	0.165128	no
C2_05590C_A	C2_05590C_A	C2_05590C_A	C2_05590C_A	Ca22chr2A_C_albicans_SC5314:1139194-1140115	37Control	37	OK	33.0591	89.4056	1.43532	1.79915	0.01445	0.104962	no
C2_03200W_A	C2_03200W_A	C2_03200W_A	PRP3	Ca22chr2A_C_albicans_SC5314:655509-656850	37Control	37	OK	13.884	37.518	1.43416	1.71645	0.0178	0.119311	no
C3_01000W_A	C3_01000W_A	C3_01000W_A	BMS1	Ca22chr3A_C_albicans_SC5314:202839-206472	37Control	37	OK	21.9068	59.177	1.43366	1.68039	0.0155	0.109835	no
C3_00930W_A	C3_00930W_A	C3_00930W_A	ATO2	Ca22chr3A_C_albicans_SC5314:189351-190149	37Control	37	OK	41.4607	111.946	1.43298	1.62467	0.02825	0.158643	no
C3_02620C_A	C3_02620C_A	C3_02620C_A	C3_02620C_A	Ca22chr3A_C_albicans_SC5314:567607-567961	37Control	37	OK	112.934	304.834	1.43254	1.75007	0.01075	0.0869743	no
C4_04520W_A	C4_04520W_A	C4_04520W_A	C4_04520W_A	Ca22chr4A_C_albicans_SC5314:969499-970330	37Control	37	OK	48.6798	131.38	1.43235	1.74206	0.01395	0.102596	no
C3_06790W_A	C3_06790W_A	C3_06790W_A	TRY6	Ca22chr3A_C_albicans_SC5314:1548989-1550393	37Control	37	OK	9.0509	24.3795	1.42953	1.44805	0.04525	0.211275	no
C2_10090C_A	C2_10090C_A	C2_10090C_A	C2_10090C_A	Ca22chr2A_C_albicans_SC5314:2068476-2071431	37Control	37	OK	7.41783	19.9795	1.42945	1.75698	0.01085	0.0875953	no
C1_09680W_A	C1_09680W_A	C1_09680W_A	MTS1	Ca22chr1A_C_albicans_SC5314:2129680-2131222	37Control	37	OK	125.774	338.542	1.4285	1.39515	0.0423	0.203141	no
CR_01490C_A	CR_01490C_A	CR_01490C_A	CR_01490C_A	Ca22chrRA_C_albicans_SC5314:344476-344854	37Control	37	OK	624.972	1682.07	1.42838	1.71521	0.0116	0.0913021	no
C3_07910W_A	C3_07910W_A	C3_07910W_A	C3_07910W_A	Ca22chr3A_C_albicans_SC5314:1781079-1784314	37Control	37	OK	1.97911	5.31451	1.42509	0.256679	0.5577	0.857947	no
C4_06410W_A	C4_06410W_A	C4_06410W_A	C4_06410W_A	Ca22chr4A_C_albicans_SC5314:1420865-1423403	37Control	37	OK	3.60557	9.68153	1.42501	1.57549	0.0322	0.17193	no
C2_03880C_A	C2_03880C_A	C2_03880C_A	C2_03880C_A	Ca22chr2A_C_albicans_SC5314:811573-812026	37Control	37	OK	197.933	531.342	1.42463	1.51869	0.0375	0.188803	no
C4_03300C_A	C4_03300C_A	C4_03300C_A	C4_03300C_A	Ca22chr4A_C_albicans_SC5314:690178-690361	37Control	37	OK	183.849	493.462	1.42442	1.41321	0.0468	0.216101	no
C1_10200C_A	C1_10200C_A	C1_10200C_A	C1_10200C_A	Ca22chr1A_C_albicans_SC5314:2246375-2248130	37Control	37	OK	28.6787	76.9494	1.42393	1.73953	0.01605	0.11238	no
C6_02250W_A	C6_02250W_A	C6_02250W_A	C6_02250W_A	Ca22chr6A_C_albicans_SC5314:466316-467456	37Control	37	OK	12.3187	33.0453	1.42359	1.69157	0.0208	0.131202	no
C5_03360W_A	C5_03360W_A	C5_03360W_A	RPO26	Ca22chr5A_C_albicans_SC5314:763488-763962	37Control	37	OK	211.327	566.811	1.42339	1.72192	0.017	0.116308	no
CR_02790C_A	CR_02790C_A	CR_02790C_A	ALG5	Ca22chrRA_C_albicans_SC5314:637547-638519	37Control	37	OK	13.9292	37.3251	1.42204	1.59619	0.02205	0.136706	no
CR_10820W_A	CR_10820W_A	CR_10820W_A	CR_10820W_A	Ca22chrRA_C_albicans_SC5314:2282414-2282765	37Control	37	OK	164.018	439.024	1.42044	1.77797	0.0152	0.108526	no
C1_11480W_A	C1_11480W_A	C1_11480W_A	PHO84	Ca22chr1A_C_albicans_SC5314:2522232-2523870	37Control	37	OK	237.313	634.118	1.41796	1.04568	0.1333	0.406066	no
C2_10360C_A	C2_10360C_A	C2_10360C_A	HEM3	Ca22chr2A_C_albicans_SC5314:2137301-2138324	37Control	37	OK	96.5844	258.041	1.41774	1.41436	0.0349	0.180192	no
C5_04840C_A	C5_04840C_A	C5_04840C_A	C5_04840C_A	Ca22chr5A_C_albicans_SC5314:1058089-1058830	37Control	37	OK	34.8859	93.1842	1.41744	1.75215	0.0131	0.0988932	no
C2_04230W_A	C2_04230W_A	C2_04230W_A	BAT21	Ca22chr2A_C_albicans_SC5314:887775-888957	37Control	37	OK	46.1999	123.36	1.41691	1.7303	0.0135	0.100503	no
C2_02400W_A	C2_02400W_A	C2_02400W_A	ECM3	Ca22chr2A_C_albicans_SC5314:476571-478212	37Control	37	OK	29.6792	79.2355	1.41669	1.70427	0.01805	0.120174	no
C2_07590W_A	C2_07590W_A	C2_07590W_A	VMA10	Ca22chr2A_C_albicans_SC5314:1549129-1549471	37Control	37	OK	324.056	864.079	1.41492	1.4513	0.0518	0.230107	no
C4_00490W_A	C4_00490W_A	C4_00490W_A	C4_00490W_A	Ca22chr4A_C_albicans_SC5314:84040-85630	37Control	37	OK	1.63137	4.34665	1.41382	1.32946	0.0543	0.236526	no
C4_06860C_A	C4_06860C_A	C4_06860C_A	C4_06860C_A	Ca22chr4A_C_albicans_SC5314:1531810-1532457	37Control	37	OK	36.2186	96.4638	1.41326	1.54349	0.03345	0.175447	no
C5_02790C_A	C5_02790C_A	C5_02790C_A	GAP1	Ca22chr5A_C_albicans_SC5314:626059-627808	37Control	37	OK	114.394	304.53	1.41258	1.41609	0.04975	0.22471	no
C5_03840W_A	C5_03840W_A	C5_03840W_A	C5_03840W_A	Ca22chr5A_C_albicans_SC5314:844112-845093	37Control	37	OK	9.46273	25.1851	1.41224	1.5668	0.02825	0.158643	no
C6_03390W_A	C6_03390W_A	C6_03390W_A	C6_03390W_A	Ca22chr6A_C_albicans_SC5314:714481-715531	37Control	37	OK	56.7261	150.854	1.41106	1.78405	0.0093	0.0787615	no
C1_03490W_A	C1_03490W_A	C1_03490W_A	C1_03490W_A	Ca22chr1A_C_albicans_SC5314:736790-737672	37Control	37	OK	69.9764	185.68	1.40788	1.42304	0.057	0.242566	no
CR_01930C_A	CR_01930C_A	CR_01930C_A	BIO2	Ca22chrRA_C_albicans_SC5314:425220-426345	37Control	37	OK	7.59201	20.1333	1.40703	1.5011	0.0349	0.180192	no
C1_06500W_A	C1_06500W_A	C1_06500W_A	C1_06500W_A	Ca22chr1A_C_albicans_SC5314:1380390-1381107	37Control	37	OK	34.4612	91.3288	1.4061	1.74096	0.01285	0.0974747	no
C4_00650W_A	C4_00650W_A	C4_00650W_A	HIS5	Ca22chr4A_C_albicans_SC5314:111274-112444	37Control	37	OK	52.5629	139.223	1.40528	1.70021	0.0186	0.122493	no
C4_06530C_A	C4_06530C_A	C4_06530C_A	XUT1	Ca22chr4A_C_albicans_SC5314:1449988-1451764	37Control	37	OK	6.86284	18.1742	1.40502	1.56703	0.02565	0.149618	no
CR_04500C_A	CR_04500C_A	CR_04500C_A	CR_04500C_A	Ca22chrRA_C_albicans_SC5314:992081-993203	37Control	37	OK	22.2147	58.8031	1.40438	1.78478	0.00985	0.0818371	no
C1_10350C_A	C1_10350C_A	C1_10350C_A	C1_10350C_A	Ca22chr1A_C_albicans_SC5314:2287134-2289441	37Control	37	OK	25.9034	68.5222	1.40343	1.72107	0.01775	0.119188	no
C4_03440C_A	C4_03440C_A	C4_03440C_A	DOT4	Ca22chr4A_C_albicans_SC5314:718926-721134	37Control	37	OK	29.1722	77.1022	1.40218	1.61777	0.02565	0.149618	no
C6_04260C_A	C6_04260C_A	C6_04260C_A	C6_04260C_A	Ca22chr6A_C_albicans_SC5314:937515-938199	37Control	37	OK	27.3761	72.3165	1.40141	1.65896	0.0236	0.142928	no
C2_10590W_A	C2_10590W_A	C2_10590W_A	GAL4	Ca22chr2A_C_albicans_SC5314:2186546-2187332	37Control	37	OK	65.4492	172.613	1.39909	1.43743	0.03605	0.184161	no
C1_13570W_A	C1_13570W_A	C1_13570W_A	MPT5	Ca22chr1A_C_albicans_SC5314:2976149-2978966	37Control	37	OK	10.2938	27.1066	1.39687	1.77985	0.0121	0.0939034	no
CR_02720C_A	CR_02720C_A	CR_02720C_A	RPC31	Ca22chrRA_C_albicans_SC5314:622651-623521	37Control	37	OK	48.9726	128.877	1.39594	1.77578	0.012	0.0935901	no
CR_00860C_A	CR_00860C_A	CR_00860C_A	TMA19	Ca22chrRA_C_albicans_SC5314:197956-198460	37Control	37	OK	2350.38	6182.76	1.39536	1.11374	0.09335	0.328092	no
C2_06910W_A	C2_06910W_A	C2_06910W_A	YPT72	Ca22chr2A_C_albicans_SC5314:1417594-1418248	37Control	37	OK	50.8318	133.569	1.39379	1.66458	0.02435	0.145321	no
C3_00640W_A	C3_00640W_A	C3_00640W_A	C3_00640W_A	Ca22chr3A_C_albicans_SC5314:103830-105315	37Control	37	OK	33.7285	88.5633	1.39274	1.77145	0.0104	0.0851299	no
C1_01690C_A	C1_01690C_A	C1_01690C_A	LSC1	Ca22chr1A_C_albicans_SC5314:342929-343901	37Control	37	OK	268.671	704.995	1.39177	1.24107	0.0855	0.31161	no
C5_04950C_A	C5_04950C_A	C5_04950C_A	C5_04950C_A	Ca22chr5A_C_albicans_SC5314:1080793-1083001	37Control	37	OK	11.7492	30.826	1.39159	1.74286	0.0169	0.116003	no
C1_04120C_A	C1_04120C_A	C1_04120C_A	C1_04120C_A	Ca22chr1A_C_albicans_SC5314:863012-864074	37Control	37	OK	14.1262	37.0385	1.39065	1.64103	0.02385	0.143841	no
CR_04210C_A	CR_04210C_A	CR_04210C_A	QDR1	Ca22chrRA_C_albicans_SC5314:941148-942678	37Control	37	OK	12.7032	33.2838	1.38963	1.68389	0.0192	0.124873	no
CR_00060C_A	CR_00060C_A	CR_00060C_A	CR_00060C_A	Ca22chrRA_C_albicans_SC5314:14970-16827	37Control	37	OK	11.5931	30.3591	1.38887	1.70549	0.0135	0.100503	no
CR_00460C_A	CR_00460C_A	CR_00460C_A	CR_00460C_A	Ca22chrRA_C_albicans_SC5314:115599-116151	37Control	37	OK	94.1922	246.639	1.38872	1.7239	0.0194	0.12548	no
C2_06650C_A	C2_06650C_A	C2_06650C_A	C2_06650C_A	Ca22chr2A_C_albicans_SC5314:1354540-1356250	37Control	37	OK	8.6084	22.5373	1.3885	1.67562	0.02035	0.129098	no
C1_11380W_A	C1_11380W_A	C1_11380W_A	NEP1	Ca22chr1A_C_albicans_SC5314:2495590-2496394	37Control	37	OK	83.7095	218.873	1.38663	1.74363	0.00965	0.0806379	no
CR_09810W_A	CR_09810W_A	CR_09810W_A	CR_09810W_A	Ca22chrRA_C_albicans_SC5314:2095753-2096467	37Control	37	OK	12.479	32.6186	1.38619	1.52839	0.0324	0.172486	no
C1_00770C_A	C1_00770C_A	C1_00770C_A	ROT1	Ca22chr1A_C_albicans_SC5314:135653-136436	37Control	37	OK	33.1738	86.5941	1.38422	1.76038	0.0101	0.0833261	no
C4_00280W_A	C4_00280W_A	C4_00280W_A	STE24	Ca22chr4A_C_albicans_SC5314:41650-43041	37Control	37	OK	72.6456	189.565	1.38374	1.53855	0.0316	0.170053	no
C1_11650W_A	C1_11650W_A	C1_11650W_A	EGD1	Ca22chr1A_C_albicans_SC5314:2554158-2554632	37Control	37	OK	1201.75	3134.94	1.3833	1.18718	0.0853	0.311241	no
C1_02710W_A	C1_02710W_A	C1_02710W_A	FRS2	Ca22chr1A_C_albicans_SC5314:565682-567173	37Control	37	OK	112.127	292.409	1.38285	1.38208	0.0562	0.240793	no
C1_06480C_A	C1_06480C_A	C1_06480C_A	C1_06480C_A	Ca22chr1A_C_albicans_SC5314:1378614-1379223	37Control	37	OK	163.358	425.898	1.38247	1.67048	0.0232	0.141598	no
C1_14260C_A	C1_14260C_A	C1_14260C_A	TIF35	Ca22chr1A_C_albicans_SC5314:3144083-3144923	37Control	37	OK	187.239	486.914	1.37878	1.53612	0.02925	0.162227	no
C3_06420C_A	C3_06420C_A	C3_06420C_A	C3_06420C_A	Ca22chr3A_C_albicans_SC5314:1460651-1461866	37Control	37	OK	61.633	160.271	1.37874	1.55809	0.03485	0.180132	no
C2_03080W_A	C2_03080W_A	C2_03080W_A	IDH2	Ca22chr2A_C_albicans_SC5314:620853-621963	37Control	37	OK	286.072	743.851	1.37864	1.31422	0.06805	0.270348	no
CR_03830C_A	CR_03830C_A	CR_03830C_A	MCM2	Ca22chrRA_C_albicans_SC5314:853957-856669	37Control	37	OK	11.8845	30.8987	1.37847	1.71768	0.0184	0.121644	no
C7_01820C_A	C7_01820C_A	C7_01820C_A	VMA11	Ca22chr7A_C_albicans_SC5314:392019-392511	37Control	37	OK	118.104	307.044	1.37839	1.68319	0.018	0.120096	no
C1_12670C_A	C1_12670C_A	C1_12670C_A	C1_12670C_A	Ca22chr1A_C_albicans_SC5314:2761698-2764434	37Control	37	OK	3.5638	9.26463	1.37832	1.52301	0.0383	0.19064	no
C7_00750W_A	C7_00750W_A	C7_00750W_A	ACB1	Ca22chr7A_C_albicans_SC5314:143528-143912	37Control	37	OK	1475.92	3829.48	1.37554	1.26483	0.088	0.316676	no
C3_01150C_A	C3_01150C_A	C3_01150C_A	C3_01150C_A	Ca22chr3A_C_albicans_SC5314:232662-233589	37Control	37	OK	67.9286	176.054	1.37393	1.67523	0.01785	0.119518	no
C3_07160W_A	C3_07160W_A	C3_07160W_A	PGA32	Ca22chr3A_C_albicans_SC5314:1637896-1639189	37Control	37	OK	8.58197	22.2366	1.37355	1.52726	0.03805	0.190197	no
C5_04270C_A	C5_04270C_A	C5_04270C_A	SAH1	Ca22chr5A_C_albicans_SC5314:945966-947319	37Control	37	OK	419.723	1087.45	1.37344	1.09761	0.1197	0.382127	no
C3_04270C_A	C3_04270C_A	C3_04270C_A	CTP1	Ca22chr3A_C_albicans_SC5314:886985-887941	37Control	37	OK	46.5849	120.65	1.3729	1.74462	0.01395	0.102596	no
C4_04470W_A	C4_04470W_A	C4_04470W_A	SAP10	Ca22chr4A_C_albicans_SC5314:960911-962273	37Control	37	OK	24.3681	63.0893	1.3724	1.62698	0.02365	0.143139	no
C4_00230W_A	C4_00230W_A	C4_00230W_A	C4_00230W_A	Ca22chr4A_C_albicans_SC5314:34781-35390	37Control	37	OK	115.02	297.676	1.37185	1.68525	0.01935	0.125286	no
CR_04100C_A	CR_04100C_A	CR_04100C_A	RPL15A	Ca22chrRA_C_albicans_SC5314:920394-921009	37Control	37	OK	2119.03	5481.99	1.37129	1.1106	0.10795	0.359166	no
C1_05010C_A	C1_05010C_A	C1_05010C_A	C1_05010C_A	Ca22chr1A_C_albicans_SC5314:1050451-1051426	37Control	37	OK	44.2551	114.353	1.36958	1.6182	0.02695	0.154287	no
C6_00120W_A	C6_00120W_A	C6_00120W_A	C6_00120W_A	Ca22chr6A_C_albicans_SC5314:13532-13778	37Control	37	OK	183.37	473.772	1.36944	1.58897	0.02115	0.132698	no
C4_00310C_A	C4_00310C_A	C4_00310C_A	MNN10	Ca22chr4A_C_albicans_SC5314:48303-49311	37Control	37	OK	51.3028	132.289	1.36658	1.73843	0.0121	0.0939034	no
C2_07290W_A	C2_07290W_A	C2_07290W_A	C2_07290W_A	Ca22chr2A_C_albicans_SC5314:1484561-1485518	37Control	37	OK	168.397	433.445	1.36399	1.37723	0.0584	0.246242	no
C3_00710W_A	C3_00710W_A	C3_00710W_A	CHS8	Ca22chr3A_C_albicans_SC5314:123502-126820	37Control	37	OK	14.7101	37.8579	1.36378	1.53766	0.0386	0.191374	no
C5_04990W_A	C5_04990W_A	C5_04990W_A	C5_04990W_A	Ca22chr5A_C_albicans_SC5314:1097647-1098139	37Control	37	OK	45.3651	116.734	1.36357	1.65744	0.0206	0.130245	no
C2_07360W_A	C2_07360W_A	C2_07360W_A	C2_07360W_A	Ca22chr2A_C_albicans_SC5314:1503393-1504845	37Control	37	OK	14.4835	37.2441	1.36261	1.72407	0.01215	0.0941363	no
C5_02270W_A	C5_02270W_A	C5_02270W_A	THR4	Ca22chr5A_C_albicans_SC5314:503290-504823	37Control	37	OK	78.38	201.49	1.36215	1.52007	0.0303	0.165709	no
C3_07600W_A	C3_07600W_A	C3_07600W_A	C3_07600W_A	Ca22chr3A_C_albicans_SC5314:1734634-1735285	37Control	37	OK	57.3002	147.205	1.36122	1.74365	0.01555	0.109859	no
C7_03210W_A	C7_03210W_A	C7_03210W_A	C7_03210W_A	Ca22chr7A_C_albicans_SC5314:695610-696768	37Control	37	OK	14.5236	37.2208	1.3577	1.64987	0.0215	0.134179	no
C2_05720C_A	C2_05720C_A	C2_05720C_A	C2_05720C_A	Ca22chr2A_C_albicans_SC5314:1168415-1169708	37Control	37	OK	77.0649	197.495	1.35767	1.49796	0.03155	0.169978	no
C1_10710C_A	C1_10710C_A	C1_10710C_A	C1_10710C_A	Ca22chr1A_C_albicans_SC5314:2376073-2377636	37Control	37	OK	3.25118	8.32325	1.35618	1.30035	0.0726	0.281594	no
C4_03730C_A	C4_03730C_A	C4_03730C_A	C4_03730C_A	Ca22chr4A_C_albicans_SC5314:793990-795340	37Control	37	OK	17.2971	44.2791	1.35609	1.72468	0.01235	0.0951379	no
C1_05050C_A	C1_05050C_A	C1_05050C_A	RRP6	Ca22chr1A_C_albicans_SC5314:1055312-1057673	37Control	37	OK	35.6567	91.2392	1.35548	1.58585	0.0238	0.143585	no
C6_03100W_A	C6_03100W_A	C6_03100W_A	SHE3	Ca22chr6A_C_albicans_SC5314:652167-653727	37Control	37	OK	26.607	68.0085	1.35391	1.63735	0.0177	0.118979	no
C2_09460C_A	C2_09460C_A	C2_09460C_A	C2_09460C_A	Ca22chr2A_C_albicans_SC5314:1930207-1933412	37Control	37	OK	15.094	38.5395	1.35236	1.7227	0.014	0.102803	no
C7_03180C_A	C7_03180C_A	C7_03180C_A	HHO1	Ca22chr7A_C_albicans_SC5314:691393-692593	37Control	37	OK	262.565	670.191	1.3519	1.33356	0.04575	0.213081	no
C6_00670W_A	C6_00670W_A	C6_00670W_A	CDC14	Ca22chr6A_C_albicans_SC5314:116837-118541	37Control	37	OK	19.7086	50.2846	1.35129	1.68345	0.02025	0.128767	no
CR_03770C_A	CR_03770C_A	CR_03770C_A	RPS30	Ca22chrRA_C_albicans_SC5314:840281-840809	37Control	37	OK	8809.55	22459.7	1.3502	1.3125	0.04885	0.221762	no
C4_04990C_A	C4_04990C_A	C4_04990C_A	C4_04990C_A	Ca22chr4A_C_albicans_SC5314:1065569-1066970	37Control	37	OK	11.3634	28.9667	1.35	1.60628	0.0267	0.153602	no
C6_02370C_A	C6_02370C_A	C6_02370C_A	C6_02370C_A	Ca22chr6A_C_albicans_SC5314:494225-495677	37Control	37	OK	58.1051	148.076	1.3496	1.5293	0.03465	0.179344	no
C1_03900W_A	C1_03900W_A	C1_03900W_A	SEN15	Ca22chr1A_C_albicans_SC5314:825307-825823	37Control	37	OK	27.3075	69.442	1.34651	1.49785	0.0406	0.197648	no
C2_06310C_A	C2_06310C_A	C2_06310C_A	GSP1	Ca22chr2A_C_albicans_SC5314:1280607-1281252	37Control	37	OK	626.687	1592.17	1.34518	1.16725	0.11245	0.368539	no
C7_00190W_A	C7_00190W_A	C7_00190W_A	C7_00190W_A	Ca22chr7A_C_albicans_SC5314:26061-27036	37Control	37	OK	36.3557	92.2989	1.34413	1.51176	0.04175	0.201321	no
C4_03070W_A	C4_03070W_A	C4_03070W_A	PGA54	Ca22chr4A_C_albicans_SC5314:639667-640696	37Control	37	OK	26.8635	68.1609	1.3433	1.48954	0.04235	0.203174	no
C5_03370C_A	C5_03370C_A	C5_03370C_A	C5_03370C_A	Ca22chr5A_C_albicans_SC5314:764151-764667	37Control	37	OK	13.056	33.0705	1.34083	1.25241	0.08865	0.317861	no
CR_06480C_A	CR_06480C_A	CR_06480C_A	RRN11	Ca22chrRA_C_albicans_SC5314:1383885-1385961	37Control	37	OK	12.9209	32.7072	1.3399	1.65208	0.01955	0.125975	no
C1_01210W_A	C1_01210W_A	C1_01210W_A	C1_01210W_A	Ca22chr1A_C_albicans_SC5314:245205-246453	37Control	37	OK	36.7702	93.0549	1.33954	1.53679	0.0307	0.16683	no
C3_04530C_A	C3_04530C_A	C3_04530C_A	TEC1	Ca22chr3A_C_albicans_SC5314:949761-951993	37Control	37	OK	74.8119	189.325	1.33953	0.871294	0.2125	0.538885	no
C2_09890W_A	C2_09890W_A	C2_09890W_A	SMM1	Ca22chr2A_C_albicans_SC5314:2024079-2025381	37Control	37	OK	37.522	94.8539	1.33797	1.51341	0.03775	0.189404	no
C1_02430C_A	C1_02430C_A	C1_02430C_A	C1_02430C_A	Ca22chr1A_C_albicans_SC5314:515593-517525	37Control	37	OK	49.778	125.779	1.33731	1.55981	0.0241	0.1447	no
C2_00030W_A	C2_00030W_A	C2_00030W_A	RRN3	Ca22chr2A_C_albicans_SC5314:5664-7335	37Control	37	OK	20.0022	50.5114	1.33645	1.68235	0.0207	0.130702	no
C1_13860C_A	C1_13860C_A	C1_13860C_A	GND1	Ca22chr1A_C_albicans_SC5314:3045789-3047977	37Control	37	OK	642.512	1618.11	1.33251	0.888497	0.1951	0.513299	no
C5_01560C_A	C5_01560C_A	C5_01560C_A	C5_01560C_A	Ca22chr5A_C_albicans_SC5314:344088-344778	37Control	37	OK	107.819	271.525	1.33247	1.52838	0.0297	0.163615	no
C3_04060C_A	C3_04060C_A	C3_04060C_A	HEM13	Ca22chr3A_C_albicans_SC5314:846208-847180	37Control	37	OK	479.456	1206.82	1.33174	0.857065	0.19625	0.5146	no
C3_01810C_A	C3_01810C_A	C3_01810C_A	MNT1	Ca22chr3A_C_albicans_SC5314:399009-400305	37Control	37	OK	212.636	534.538	1.32991	1.26337	0.08915	0.318925	no
C6_04530C_A	C6_04530C_A	C6_04530C_A	C6_04530C_A	Ca22chr6A_C_albicans_SC5314:1008501-1011345	37Control	37	OK	16.9965	42.7153	1.32951	1.67429	0.0127	0.0967656	no
C6_04560W_A	C6_04560W_A	C6_04560W_A	C6_04560W_A	Ca22chr6A_C_albicans_SC5314:1015668-1016658	37Control	37	OK	112.541	282.571	1.32816	1.48957	0.03875	0.191815	no
C7_00680W_A	C7_00680W_A	C7_00680W_A	C7_00680W_A	Ca22chr7A_C_albicans_SC5314:126560-127202	37Control	37	OK	12.1275	30.442	1.32778	1.39006	0.0387	0.191668	no
C1_05650W_A	C1_05650W_A	C1_05650W_A	C1_05650W_A	Ca22chr1A_C_albicans_SC5314:1182506-1183265	37Control	37	OK	38.5169	96.6821	1.32776	1.69102	0.01595	0.112013	no
CR_10620C_A	CR_10620C_A	CR_10620C_A	CR_10620C_A	Ca22chrRA_C_albicans_SC5314:2251019-2253017	37Control	37	OK	14.148	35.466	1.32584	1.6875	0.0186	0.122493	no
C7_03670W_A	C7_03670W_A	C7_03670W_A	DED81	Ca22chr7A_C_albicans_SC5314:815420-817079	37Control	37	OK	145.654	364.935	1.32509	1.32043	0.0581	0.245472	no
C1_09390W_A	C1_09390W_A	C1_09390W_A	C1_09390W_A	Ca22chr1A_C_albicans_SC5314:2070404-2071802	37Control	37	OK	11.7299	29.3836	1.32483	1.55661	0.03335	0.175264	no
C2_07000W_A	C2_07000W_A	C2_07000W_A	C2_07000W_A	Ca22chr2A_C_albicans_SC5314:1436456-1437149	37Control	37	OK	84.5666	211.725	1.32403	1.70158	0.0178	0.119311	no
C6_03840C_A	C6_03840C_A	C6_03840C_A	SNQ2	Ca22chr6A_C_albicans_SC5314:832294-836782	37Control	37	OK	13.4214	33.5694	1.32261	1.46544	0.0354	0.182075	no
CR_07180W_A	CR_07180W_A	CR_07180W_A	EMP46	Ca22chrRA_C_albicans_SC5314:1564406-1565804	37Control	37	OK	38.1617	95.4126	1.32205	1.61414	0.0213	0.133196	no
C1_03370W_A	C1_03370W_A	C1_03370W_A	C1_03370W_A	Ca22chr1A_C_albicans_SC5314:706487-708377	37Control	37	OK	386.841	966.137	1.32049	1.08138	0.14365	0.424949	no
C6_01200W_A	C6_01200W_A	C6_01200W_A	C6_01200W_A	Ca22chr6A_C_albicans_SC5314:237059-237734	37Control	37	OK	9.67023	24.1388	1.31973	1.20639	0.0957	0.333922	no
C5_05270C_A	C5_05270C_A	C5_05270C_A	C5_05270C_A	Ca22chr5A_C_albicans_SC5314:1149196-1150108	37Control	37	OK	52.3558	130.61	1.31885	1.58299	0.0264	0.152669	no
C1_13870W_A	C1_13870W_A	C1_13870W_A	MET3	Ca22chr1A_C_albicans_SC5314:3051418-3053002	37Control	37	OK	141.961	354.097	1.31865	1.30853	0.0687	0.27207	no
C6_00420W_A	C6_00420W_A	C6_00420W_A	DPM2	Ca22chr6A_C_albicans_SC5314:74104-74448	37Control	37	OK	439	1094.93	1.31855	1.48402	0.04645	0.215171	no
C4_05020W_A	C4_05020W_A	C4_05020W_A	IMG2	Ca22chr4A_C_albicans_SC5314:1071271-1071643	37Control	37	OK	33.9867	84.7559	1.31834	1.40523	0.0465	0.21535	no
C4_00480W_A	C4_00480W_A	C4_00480W_A	DUR4	Ca22chr4A_C_albicans_SC5314:81573-83547	37Control	37	OK	5.71965	14.257	1.31768	1.5467	0.0273	0.155534	no
C1_13900C_A	C1_13900C_A	C1_13900C_A	LCB2	Ca22chr1A_C_albicans_SC5314:3061336-3063046	37Control	37	OK	39.7638	99.0966	1.31738	1.59049	0.0271	0.15491	no
C3_04690C_A	C3_04690C_A	C3_04690C_A	C3_04690C_A	Ca22chr3A_C_albicans_SC5314:993463-994486	37Control	37	OK	15.3787	38.319	1.31713	1.57767	0.0319	0.170984	no
C6_00110C_A	C6_00110C_A	C6_00110C_A	C6_00110C_A	Ca22chr6A_C_albicans_SC5314:12647-13433	37Control	37	OK	22.6249	56.3421	1.3163	1.56373	0.0307	0.16683	no
C2_05100C_A	C2_05100C_A	C2_05100C_A	ERF1	Ca22chr2A_C_albicans_SC5314:1055349-1056660	37Control	37	OK	167.749	417.242	1.31458	1.29143	0.0745	0.286252	no
C6_00480C_A	C6_00480C_A	C6_00480C_A	FET31	Ca22chr6A_C_albicans_SC5314:87449-89309	37Control	37	OK	11.8773	29.5308	1.31402	1.59924	0.01945	0.125631	no
C2_10740C_A	C2_10740C_A	C2_10740C_A	C2_10740C_A	Ca22chr2A_C_albicans_SC5314:2204860-2208582	37Control	37	OK	21.9679	54.5774	1.3129	1.5434	0.0298	0.164022	no
C3_03800W_A	C3_03800W_A	C3_03800W_A	PTR22	Ca22chr3A_C_albicans_SC5314:797736-799467	37Control	37	OK	333.473	828.116	1.31226	1.07449	0.14595	0.428856	no
CR_03650W_A	CR_03650W_A	CR_03650W_A	SGD1	Ca22chrRA_C_albicans_SC5314:809882-812918	37Control	37	OK	16.6144	41.238	1.31154	1.58981	0.0271	0.15491	no
C1_13720W_A	C1_13720W_A	C1_13720W_A	C1_13720W_A	Ca22chr1A_C_albicans_SC5314:3013879-3015796	37Control	37	OK	20.0429	49.7381	1.31126	1.67214	0.01795	0.119975	no
C3_00350W_A	C3_00350W_A	C3_00350W_A	TPT1	Ca22chr3A_C_albicans_SC5314:48914-49538	37Control	37	OK	44.3041	109.911	1.31082	1.65489	0.0145	0.105244	no
C4_01490W_A	C4_01490W_A	C4_01490W_A	NIP1	Ca22chr4A_C_albicans_SC5314:309929-312554	37Control	37	OK	68.6926	170.39	1.31061	1.38685	0.0443	0.208598	no
C7_01360C_A	C7_01360C_A	C7_01360C_A	C7_01360C_A	Ca22chr7A_C_albicans_SC5314:277181-277736	37Control	37	OK	21.1848	52.5387	1.31035	1.464	0.04345	0.20661	no
C4_00380W_A	C4_00380W_A	C4_00380W_A	C4_00380W_A	Ca22chr4A_C_albicans_SC5314:58580-59564	37Control	37	OK	49.2044	121.891	1.30874	1.59531	0.0239	0.144004	no
C4_00020W_A	C4_00020W_A	C4_00020W_A	C4_00020W_A	Ca22chr4A_C_albicans_SC5314:2844-3891	37Control	37	OK	69.1511	171.293	1.30865	1.44805	0.0396	0.194388	no
C5_05280C_A	C5_05280C_A	C5_05280C_A	SDH4	Ca22chr5A_C_albicans_SC5314:1150248-1150743	37Control	37	OK	100.867	249.661	1.30751	1.65812	0.01975	0.12683	no
C1_05110C_A	C1_05110C_A	C1_05110C_A	ARO4	Ca22chr1A_C_albicans_SC5314:1068522-1069635	37Control	37	OK	235.541	582.958	1.30741	1.25677	0.08645	0.313494	no
C6_01750C_A	C6_01750C_A	C6_01750C_A	C6_01750C_A	Ca22chr6A_C_albicans_SC5314:368560-369448	37Control	37	OK	10.2274	25.2996	1.30667	1.42273	0.05045	0.226352	no
C2_00340C_A	C2_00340C_A	C2_00340C_A	ARO8	Ca22chr2A_C_albicans_SC5314:42097-43573	37Control	37	OK	88.8729	219.588	1.30499	1.30167	0.0517	0.229879	no
CR_07080W_A	CR_07080W_A	CR_07080W_A	CR_07080W_A	Ca22chrRA_C_albicans_SC5314:1538706-1539444	37Control	37	OK	291.571	719.466	1.30308	1.38165	0.04185	0.201752	no
C4_03170W_A	C4_03170W_A	C4_03170W_A	C4_03170W_A	Ca22chr4A_C_albicans_SC5314:665603-666623	37Control	37	OK	10.6412	26.2516	1.30274	1.42551	0.04835	0.220075	no
C1_10820C_A	C1_10820C_A	C1_10820C_A	C1_10820C_A	Ca22chr1A_C_albicans_SC5314:2396155-2398237	37Control	37	OK	57.81	142.609	1.30267	1.24899	0.0652	0.263246	no
CR_01600C_A	CR_01600C_A	CR_01600C_A	CR_01600C_A	Ca22chrRA_C_albicans_SC5314:363822-366783	37Control	37	OK	7.64918	18.8568	1.30171	1.554	0.0303	0.165709	no
C5_05410C_A	C5_05410C_A	C5_05410C_A	ILV3	Ca22chr5A_C_albicans_SC5314:1169456-1171226	37Control	37	OK	83.3797	205.424	1.30084	1.39903	0.04865	0.22096	no
C2_07910C_A	C2_07910C_A	C2_07910C_A	C2_07910C_A	Ca22chr2A_C_albicans_SC5314:1611756-1611933	37Control	37	OK	661.771	1630.35	1.30078	1.46962	0.04	0.195485	no
C4_04810C_A	C4_04810C_A	C4_04810C_A	C4_04810C_A	Ca22chr4A_C_albicans_SC5314:1034790-1035768	37Control	37	OK	58.8105	144.787	1.29978	1.64826	0.0161	0.112688	no
C6_03940C_A	C6_03940C_A	C6_03940C_A	PBP2	Ca22chr6A_C_albicans_SC5314:853684-855274	37Control	37	OK	50.6251	124.569	1.29902	1.57311	0.02395	0.144167	no
CR_09900C_A	CR_09900C_A	CR_09900C_A	DPB2	Ca22chrRA_C_albicans_SC5314:2114183-2116310	37Control	37	OK	9.01564	22.1337	1.29574	1.58761	0.0222	0.137004	no
C1_05300C_A	C1_05300C_A	C1_05300C_A	PRD1	Ca22chr1A_C_albicans_SC5314:1113319-1115428	37Control	37	OK	38.6629	94.9088	1.29559	1.17254	0.10635	0.355854	no
CR_04650W_A	CR_04650W_A	CR_04650W_A	CR_04650W_A	Ca22chrRA_C_albicans_SC5314:1015921-1016209	37Control	37	OK	329.172	807.507	1.29463	1.54755	0.03475	0.179763	no
C5_00040C_A	C5_00040C_A	C5_00040C_A	C5_00040C_A	Ca22chr5A_C_albicans_SC5314:4829-6473	37Control	37	OK	32.4385	79.5439	1.29404	1.57782	0.0236	0.142928	no
C4_02460W_A	C4_02460W_A	C4_02460W_A	C4_02460W_A	Ca22chr4A_C_albicans_SC5314:497491-498130	37Control	37	OK	19.4151	47.5965	1.29368	1.38125	0.0591	0.247862	no
C2_03020C_A	C2_03020C_A	C2_03020C_A	C2_03020C_A	Ca22chr2A_C_albicans_SC5314:606158-608219	37Control	37	OK	31.3393	76.7923	1.29299	1.44719	0.0312	0.168817	no
C2_06210C_A	C2_06210C_A	C2_06210C_A	SER1	Ca22chr2A_C_albicans_SC5314:1266799-1267978	37Control	37	OK	125.283	306.934	1.29274	1.29533	0.0548	0.23766	no
C6_00600C_A	C6_00600C_A	C6_00600C_A	YHM2	Ca22chr6A_C_albicans_SC5314:109685-110591	37Control	37	OK	101.272	247.293	1.28799	1.5717	0.0267	0.153602	no
C2_06660W_A	C2_06660W_A	C2_06660W_A	C2_06660W_A	Ca22chr2A_C_albicans_SC5314:1356509-1357319	37Control	37	OK	19.0085	46.393	1.28726	1.51022	0.0322	0.17193	no
C1_02460W_A	C1_02460W_A	C1_02460W_A	RPL10	Ca22chr1A_C_albicans_SC5314:521287-521950	37Control	37	OK	2044.17	4984.51	1.28593	1.03922	0.1265	0.395522	no
C6_00100C_A	C6_00100C_A	C6_00100C_A	HET1	Ca22chr6A_C_albicans_SC5314:11949-12543	37Control	37	OK	291.473	709.567	1.28358	1.31701	0.06095	0.253085	no
C5_04340W_A	C5_04340W_A	C5_04340W_A	C5_04340W_A	Ca22chr5A_C_albicans_SC5314:961457-962357	37Control	37	OK	53.7922	130.878	1.28276	1.64786	0.02165	0.134892	no
C1_09640W_A	C1_09640W_A	C1_09640W_A	ADE12	Ca22chr1A_C_albicans_SC5314:2122165-2123452	37Control	37	OK	188.02	457.453	1.28274	1.28108	0.0693	0.273411	no
C6_03540W_A	C6_03540W_A	C6_03540W_A	C6_03540W_A	Ca22chr6A_C_albicans_SC5314:752356-753754	37Control	37	OK	25.5008	61.9911	1.28152	1.60146	0.02875	0.160351	no
C1_05230W_A	C1_05230W_A	C1_05230W_A	C1_05230W_A	Ca22chr1A_C_albicans_SC5314:1103296-1103884	37Control	37	OK	39.9059	96.9565	1.28073	1.53988	0.0313	0.169212	no
C2_02510W_A	C2_02510W_A	C2_02510W_A	PRS1	Ca22chr2A_C_albicans_SC5314:503319-504282	37Control	37	OK	139.072	337.776	1.28024	1.4215	0.0495	0.223957	no
C1_05470W_A	C1_05470W_A	C1_05470W_A	MTM1	Ca22chr1A_C_albicans_SC5314:1149113-1150163	37Control	37	OK	38.7548	93.9655	1.27775	1.5642	0.02945	0.162809	no
C6_03120W_A	C6_03120W_A	C6_03120W_A	POL5	Ca22chr6A_C_albicans_SC5314:655157-658325	37Control	37	OK	9.75728	23.6492	1.27724	1.61677	0.02225	0.137223	no
C6_02900C_A	C6_02900C_A	C6_02900C_A	C6_02900C_A	Ca22chr6A_C_albicans_SC5314:599810-601172	37Control	37	OK	16.0952	39.0046	1.27701	1.60905	0.0185	0.122134	no
C1_05220C_A	C1_05220C_A	C1_05220C_A	C1_05220C_A	Ca22chr1A_C_albicans_SC5314:1102610-1103048	37Control	37	OK	19.5268	47.2523	1.27493	1.21653	0.0836	0.307781	no
C2_09160W_A	C2_09160W_A	C2_09160W_A	C2_09160W_A	Ca22chr2A_C_albicans_SC5314:1882408-1883422	37Control	37	OK	29.4901	71.3619	1.27492	1.5986	0.02915	0.162054	no
C7_04040C_A	C7_04040C_A	C7_04040C_A	NPT1	Ca22chr7A_C_albicans_SC5314:878585-879851	37Control	37	OK	45.4678	109.951	1.27395	1.46836	0.0461	0.213971	no
C4_00690C_A	C4_00690C_A	C4_00690C_A	C4_00690C_A	Ca22chr4A_C_albicans_SC5314:116218-119166	37Control	37	OK	2.41497	5.83976	1.2739	0.310602	0.4582	0.798279	no
CR_01860W_A	CR_01860W_A	CR_01860W_A	OPT9	Ca22chrRA_C_albicans_SC5314:417901-418700	37Control	37	OK	0.287258	0.694601	1.27384	0.843712	0.2079	0.531316	no
C1_04680W_A	C1_04680W_A	C1_04680W_A	PIL1	Ca22chr1A_C_albicans_SC5314:973479-974406	37Control	37	OK	489.849	1183.99	1.27324	1.03999	0.15125	0.439019	no
C1_00210C_A	C1_00210C_A	C1_00210C_A	C1_00210C_A	Ca22chr1A_C_albicans_SC5314:34524-35679	37Control	37	OK	131.162	316.773	1.2721	1.38165	0.0373	0.188451	no
C3_03040W_A	C3_03040W_A	C3_03040W_A	AIP2	Ca22chr3A_C_albicans_SC5314:641787-643371	37Control	37	OK	66.2742	159.878	1.27045	1.39846	0.0433	0.206157	no
C4_05580C_A	C4_05580C_A	C4_05580C_A	C4_05580C_A	Ca22chr4A_C_albicans_SC5314:1217918-1218905	37Control	37	OK	0.466985	1.12614	1.26994	0.697627	0.29885	0.645988	no
C4_01050C_A	C4_01050C_A	C4_01050C_A	RPL40B	Ca22chr4A_C_albicans_SC5314:208445-208604	37Control	37	OK	21202.9	51102.6	1.26913	1.04737	0.1551	0.445797	no
C1_03350C_A	C1_03350C_A	C1_03350C_A	RLI1	Ca22chr1A_C_albicans_SC5314:697529-699398	37Control	37	OK	117.489	283.131	1.26894	1.26422	0.081	0.301688	no
CR_05220C_A	CR_05220C_A	CR_05220C_A	GUT1	Ca22chrRA_C_albicans_SC5314:1126970-1128866	37Control	37	OK	32.7003	78.7583	1.26813	1.44113	0.03975	0.19487	no
C1_09800C_A	C1_09800C_A	C1_09800C_A	TVP18	Ca22chr1A_C_albicans_SC5314:2146923-2147445	37Control	37	OK	66.5331	160.052	1.2664	1.40666	0.054	0.236039	no
C5_04700C_A	C5_04700C_A	C5_04700C_A	MES1	Ca22chr5A_C_albicans_SC5314:1020158-1022405	37Control	37	OK	78.8985	189.774	1.26621	1.24045	0.08885	0.318396	no
CR_04540C_A	CR_04540C_A	CR_04540C_A	RPR2	Ca22chrRA_C_albicans_SC5314:997808-999619	37Control	37	OK	49.964	120.159	1.26599	0.485748	0.68305	0.91548	no
C5_04900C_A	C5_04900C_A	C5_04900C_A	C5_04900C_A	Ca22chr5A_C_albicans_SC5314:1065585-1066695	37Control	37	OK	43.7769	105.186	1.2647	1.61918	0.02405	0.14463	no
C4_02800W_A	C4_02800W_A	C4_02800W_A	RPC53	Ca22chr4A_C_albicans_SC5314:584379-585738	37Control	37	OK	28.6325	68.7668	1.26406	1.59366	0.01925	0.125025	no
C2_07350W_A	C2_07350W_A	C2_07350W_A	MCM3	Ca22chr2A_C_albicans_SC5314:1500486-1503123	37Control	37	OK	28.0219	67.2329	1.26261	1.44828	0.0458	0.213262	no
C4_03040W_A	C4_03040W_A	C4_03040W_A	C4_03040W_A	Ca22chr4A_C_albicans_SC5314:633411-633630	37Control	37	OK	812.348	1948.16	1.26194	1.60029	0.0245	0.145938	no
C4_01200C_A	C4_01200C_A	C4_01200C_A	AAT22	Ca22chr4A_C_albicans_SC5314:244109-245339	37Control	37	OK	46.8472	112.286	1.26115	1.60639	0.0205	0.129787	no
C2_06800C_A	C2_06800C_A	C2_06800C_A	C2_06800C_A	Ca22chr2A_C_albicans_SC5314:1392695-1393475	37Control	37	OK	47.2907	113.337	1.261	1.60125	0.02355	0.142809	no
C6_03220W_A	C6_03220W_A	C6_03220W_A	C6_03220W_A	Ca22chr6A_C_albicans_SC5314:676466-677552	37Control	37	OK	18.6437	44.6727	1.2607	1.5498	0.0265	0.153013	no
C2_06440C_A	C2_06440C_A	C2_06440C_A	C2_06440C_A	Ca22chr2A_C_albicans_SC5314:1310641-1311376	37Control	37	OK	44.0099	105.416	1.2602	1.4183	0.04855	0.220666	no
C4_06100W_A	C4_06100W_A	C4_06100W_A	CWH41	Ca22chr4A_C_albicans_SC5314:1355312-1357805	37Control	37	OK	12.5149	29.9469	1.25876	1.56024	0.03275	0.173418	no
CR_09360W_A	CR_09360W_A	CR_09360W_A	FCY24	Ca22chrRA_C_albicans_SC5314:1983093-1984680	37Control	37	OK	7.51695	17.9813	1.25828	1.45471	0.03055	0.16664	no
C7_00230W_A	C7_00230W_A	C7_00230W_A	C7_00230W_A	Ca22chr7A_C_albicans_SC5314:31778-33545	37Control	37	OK	10.7416	25.6658	1.25663	1.46918	0.03695	0.187084	no
C2_04370W_A	C2_04370W_A	C2_04370W_A	C2_04370W_A	Ca22chr2A_C_albicans_SC5314:914704-915937	37Control	37	OK	74.6893	178.082	1.25357	1.52019	0.0274	0.155821	no
C5_00290W_A	C5_00290W_A	C5_00290W_A	DUS4	Ca22chr5A_C_albicans_SC5314:47853-48873	37Control	37	OK	37.3852	89.1299	1.25344	1.57097	0.0184	0.121644	no
CR_03020C_A	CR_03020C_A	CR_03020C_A	CR_03020C_A	Ca22chrRA_C_albicans_SC5314:691387-692170	37Control	37	OK	48.1416	114.746	1.25309	1.49092	0.0383	0.19064	no
C1_02300W_A	C1_02300W_A	C1_02300W_A	C1_02300W_A	Ca22chr1A_C_albicans_SC5314:483697-484063	37Control	37	OK	30.3463	72.2625	1.25173	1.31707	0.0564	0.241266	no
C3_07470W_A	C3_07470W_A	C3_07470W_A	C3_07470W_A	Ca22chr3A_C_albicans_SC5314:1707691-1708939	37Control	37	OK	9.43451	22.46	1.25134	1.31258	0.06785	0.269668	no
C3_04120C_A	C3_04120C_A	C3_04120C_A	C3_04120C_A	Ca22chr3A_C_albicans_SC5314:862451-863414	37Control	37	OK	24.4608	58.2271	1.25122	1.58314	0.02005	0.128101	no
C4_05980C_A	C4_05980C_A	C4_05980C_A	C4_05980C_A	Ca22chr4A_C_albicans_SC5314:1329066-1331142	37Control	37	OK	9.7597	23.2217	1.25056	1.53311	0.0264	0.152669	no
C1_09320C_A	C1_09320C_A	C1_09320C_A	C1_09320C_A	Ca22chr1A_C_albicans_SC5314:2050004-2051678	37Control	37	OK	26.3961	62.7714	1.24978	1.46671	0.03345	0.175447	no
C2_09400C_A	C2_09400C_A	C2_09400C_A	ERG24	Ca22chr2A_C_albicans_SC5314:1913245-1914592	37Control	37	OK	26.4485	62.8907	1.24966	1.40461	0.054	0.236039	no
CR_08100C_A	CR_08100C_A	CR_08100C_A	RIO2	Ca22chrRA_C_albicans_SC5314:1764413-1765817	37Control	37	OK	61.9823	147.382	1.24963	1.5301	0.0299	0.164284	no
C4_03830W_A	C4_03830W_A	C4_03830W_A	C4_03830W_A	Ca22chr4A_C_albicans_SC5314:811966-816289	37Control	37	OK	8.36408	19.8796	1.24901	1.54578	0.0319	0.170984	no
C4_00740W_A	C4_00740W_A	C4_00740W_A	C4_00740W_A	Ca22chr4A_C_albicans_SC5314:126004-126508	37Control	37	OK	48.0218	113.975	1.24696	1.50067	0.03465	0.179344	no
C1_11500C_A	C1_11500C_A	C1_11500C_A	ARO7	Ca22chr1A_C_albicans_SC5314:2528375-2529182	37Control	37	OK	49.8519	118.279	1.24647	1.58268	0.025	0.14761	no
C2_01070W_A	C2_01070W_A	C2_01070W_A	C2_01070W_A	Ca22chr2A_C_albicans_SC5314:174571-175753	37Control	37	OK	90.3266	214.262	1.24615	1.47111	0.0368	0.186626	no
C6_00940C_A	C6_00940C_A	C6_00940C_A	C6_00940C_A	Ca22chr6A_C_albicans_SC5314:184755-185646	37Control	37	OK	9.79263	23.2123	1.24512	1.27886	0.07485	0.287245	no
C4_02850W_A	C4_02850W_A	C4_02850W_A	C4_02850W_A	Ca22chr4A_C_albicans_SC5314:592422-594816	37Control	37	OK	25.0846	59.4359	1.24454	1.50127	0.0375	0.188803	no
CR_03430W_A	CR_03430W_A	CR_03430W_A	CR_03430W_A	Ca22chrRA_C_albicans_SC5314:759807-760161	37Control	37	OK	93.691	221.537	1.24157	1.49213	0.0355	0.18239	no
C7_03330C_A	C7_03330C_A	C7_03330C_A	SHM1	Ca22chr7A_C_albicans_SC5314:736054-737536	37Control	37	OK	127.5	301.214	1.2403	1.24073	0.0877	0.316019	no
C4_05450C_A	C4_05450C_A	C4_05450C_A	CBR1	Ca22chr4A_C_albicans_SC5314:1188800-1189685	37Control	37	OK	139.132	328.527	1.23956	1.29648	0.07845	0.295758	no
C2_01550W_A	C2_01550W_A	C2_01550W_A	SMP2	Ca22chr2A_C_albicans_SC5314:277092-279438	37Control	37	OK	29.2181	68.9508	1.2387	1.29778	0.0751	0.288029	no
C1_05710C_A	C1_05710C_A	C1_05710C_A	UGA4	Ca22chr1A_C_albicans_SC5314:1192510-1194184	37Control	37	OK	2.54373	6.00277	1.23868	1.14694	0.11255	0.368675	no
C2_07830W_A	C2_07830W_A	C2_07830W_A	FLC3	Ca22chr2A_C_albicans_SC5314:1595571-1597728	37Control	37	OK	18.5184	43.6915	1.23839	1.5032	0.03015	0.165128	no
CR_00510C_A	CR_00510C_A	CR_00510C_A	ADE1	Ca22chrRA_C_albicans_SC5314:120976-121852	37Control	37	OK	158.321	373.525	1.23835	1.25739	0.0698	0.274407	no
C1_10320W_A	C1_10320W_A	C1_10320W_A	C1_10320W_A	Ca22chr1A_C_albicans_SC5314:2282221-2283286	37Control	37	OK	18.6227	43.9297	1.23813	1.39271	0.05825	0.24583	no
C1_07800W_A	C1_07800W_A	C1_07800W_A	MTO1	Ca22chr1A_C_albicans_SC5314:1700386-1702474	37Control	37	OK	14.3437	33.8336	1.23804	1.48167	0.04535	0.211637	no
C6_00190W_A	C6_00190W_A	C6_00190W_A	C6_00190W_A	Ca22chr6A_C_albicans_SC5314:21615-22845	37Control	37	OK	22.5466	53.1765	1.23788	1.55271	0.03035	0.165934	no
C2_08670C_A	C2_08670C_A	C2_08670C_A	UTP15	Ca22chr2A_C_albicans_SC5314:1762252-1763524	37Control	37	OK	48.5677	114.536	1.23773	1.5626	0.0227	0.139269	no
C2_06700W_A	C2_06700W_A	C2_06700W_A	AMO2	Ca22chr2A_C_albicans_SC5314:1371620-1373636	37Control	37	OK	15.535	36.5882	1.23585	1.43635	0.0371	0.187692	no
C2_04700C_A	C2_04700C_A	C2_04700C_A	C2_04700C_A	Ca22chr2A_C_albicans_SC5314:984869-985955	37Control	37	OK	18.8417	44.3215	1.23408	1.44721	0.04945	0.223946	no
C1_01570C_A	C1_01570C_A	C1_01570C_A	RPB7	Ca22chr1A_C_albicans_SC5314:317949-318471	37Control	37	OK	68.6802	161.437	1.233	1.58192	0.0264	0.152669	no
C5_02470W_A	C5_02470W_A	C5_02470W_A	INT1	Ca22chr5A_C_albicans_SC5314:547643-553208	37Control	37	OK	6.53556	15.3599	1.23279	1.57783	0.0246	0.146072	no
C6_00440C_A	C6_00440C_A	C6_00440C_A	FET34	Ca22chr6A_C_albicans_SC5314:76653-78531	37Control	37	OK	98.0302	230.277	1.23207	1.32	0.0587	0.246844	no
CR_10120C_A	CR_10120C_A	CR_10120C_A	CR_10120C_A	Ca22chrRA_C_albicans_SC5314:2163620-2164442	37Control	37	OK	18.7531	44.0383	1.23163	1.46376	0.0399	0.195351	no
CR_09740W_A	CR_09740W_A	CR_09740W_A	CR_09740W_A	Ca22chrRA_C_albicans_SC5314:2069944-2071549	37Control	37	OK	33.0084	77.4911	1.2312	1.55439	0.02255	0.138574	no
C4_01690C_A	C4_01690C_A	C4_01690C_A	HRT2	Ca22chr4A_C_albicans_SC5314:334946-336305	37Control	37	OK	42.653	100.112	1.23089	1.29606	0.07535	0.288752	no
C1_08910C_A	C1_08910C_A	C1_08910C_A	C1_08910C_A	Ca22chr1A_C_albicans_SC5314:1936146-1938249	37Control	37	OK	6.11379	14.3482	1.23073	1.45948	0.0378	0.189554	no
C4_05430C_A	C4_05430C_A	C4_05430C_A	GAP5	Ca22chr4A_C_albicans_SC5314:1184109-1185966	37Control	37	OK	54.6293	128.179	1.23041	1.36586	0.0624	0.256449	no
C1_09230C_A	C1_09230C_A	C1_09230C_A	GRP1	Ca22chr1A_C_albicans_SC5314:2027228-2028242	37Control	37	OK	26.1876	61.3507	1.2282	1.51787	0.0306	0.16672	no
C1_06470W_A	C1_06470W_A	C1_06470W_A	C1_06470W_A	Ca22chr1A_C_albicans_SC5314:1377811-1378198	37Control	37	OK	30886.4	72338.6	1.22779	1.05971	0.14225	0.422067	no
CR_09310W_A	CR_09310W_A	CR_09310W_A	CR_09310W_A	Ca22chrRA_C_albicans_SC5314:1974737-1976477	37Control	37	OK	23.2578	54.4502	1.22722	1.55695	0.02745	0.156011	no
C4_06790W_A	C4_06790W_A	C4_06790W_A	C4_06790W_A	Ca22chr4A_C_albicans_SC5314:1513765-1514587	37Control	37	OK	70.2634	164.482	1.22708	1.57777	0.0273	0.155534	no
C1_01530C_A	C1_01530C_A	C1_01530C_A	C1_01530C_A	Ca22chr1A_C_albicans_SC5314:306617-308486	37Control	37	OK	100.067	233.866	1.22471	1.15226	0.11605	0.375245	no
CR_01760C_A	CR_01760C_A	CR_01760C_A	FRS1	Ca22chrRA_C_albicans_SC5314:398685-400464	37Control	37	OK	145.444	339.741	1.22397	1.19421	0.0738	0.284607	no
C3_00250C_A	C3_00250C_A	C3_00250C_A	TIM44	Ca22chr3A_C_albicans_SC5314:31717-32992	37Control	37	OK	93.5461	218.484	1.22378	1.43133	0.03535	0.181868	no
C6_01030W_A	C6_01030W_A	C6_01030W_A	HAL22	Ca22chr6A_C_albicans_SC5314:200517-201594	37Control	37	OK	25.9618	60.6174	1.22334	1.51266	0.0299	0.164284	no
CR_02610C_A	CR_02610C_A	CR_02610C_A	CR_02610C_A	Ca22chrRA_C_albicans_SC5314:582047-583778	37Control	37	OK	30.0338	70.1175	1.22319	1.55392	0.02345	0.142524	no
C4_05000W_A	C4_05000W_A	C4_05000W_A	C4_05000W_A	Ca22chr4A_C_albicans_SC5314:1068052-1069351	37Control	37	OK	7.83885	18.2992	1.22307	1.33171	0.0605	0.252106	no
C3_07420W_A	C3_07420W_A	C3_07420W_A	C3_07420W_A	Ca22chr3A_C_albicans_SC5314:1699249-1700236	37Control	37	OK	175.394	409.254	1.22239	1.35469	0.05195	0.23061	no
C4_03740W_A	C4_03740W_A	C4_03740W_A	C4_03740W_A	Ca22chr4A_C_albicans_SC5314:795552-796467	37Control	37	OK	44.3326	103.432	1.22224	1.54742	0.02695	0.154287	no
C4_01500W_A	C4_01500W_A	C4_01500W_A	C4_01500W_A	Ca22chr4A_C_albicans_SC5314:312955-314143	37Control	37	OK	30.4857	71.1247	1.22222	1.48174	0.0362	0.184627	no
C6_00870C_A	C6_00870C_A	C6_00870C_A	ILV5	Ca22chr6A_C_albicans_SC5314:170115-171318	37Control	37	OK	472.448	1101.96	1.22184	0.989183	0.16335	0.460859	no
C7_03880C_A	C7_03880C_A	C7_03880C_A	C7_03880C_A	Ca22chr7A_C_albicans_SC5314:856036-856963	37Control	37	OK	30.1636	70.3285	1.2213	1.52611	0.03325	0.174983	no
C7_03660C_A	C7_03660C_A	C7_03660C_A	C7_03660C_A	Ca22chr7A_C_albicans_SC5314:812903-814979	37Control	37	OK	85.5365	199.269	1.2201	1.21972	0.09585	0.334383	no
C7_01950W_A	C7_01950W_A	C7_01950W_A	C7_01950W_A	Ca22chr7A_C_albicans_SC5314:418438-419293	37Control	37	OK	35.205	81.965	1.21923	1.55855	0.02565	0.149618	no
C3_03230C_A	C3_03230C_A	C3_03230C_A	C3_03230C_A	Ca22chr3A_C_albicans_SC5314:681407-683057	37Control	37	OK	12.7396	29.6105	1.21679	1.50179	0.0338	0.176545	no
C3_01360C_A	C3_01360C_A	C3_01360C_A	IRO1	Ca22chr3A_C_albicans_SC5314:291478-293269	37Control	37	OK	15.5969	36.2412	1.21637	1.44066	0.0467	0.21601	no
C5_04860C_A	C5_04860C_A	C5_04860C_A	C5_04860C_A	Ca22chr5A_C_albicans_SC5314:1059959-1060479	37Control	37	OK	47.7245	110.879	1.21618	1.43363	0.04375	0.207199	no
CR_05900W_A	CR_05900W_A	CR_05900W_A	CR_05900W_A	Ca22chrRA_C_albicans_SC5314:1236908-1238417	37Control	37	OK	8.52599	19.7994	1.21552	1.43751	0.0452	0.211199	no
C2_10810W_A	C2_10810W_A	C2_10810W_A	C2_10810W_A	Ca22chr2A_C_albicans_SC5314:2216350-2217262	37Control	37	OK	30.1492	69.9981	1.2152	1.55891	0.0257	0.149864	no
C5_01150C_A	C5_01150C_A	C5_01150C_A	C5_01150C_A	Ca22chr5A_C_albicans_SC5314:265330-265415	37Control	37	OK	314.609	729.918	1.21417	0.866345	0.23865	0.57188	no
C5_00110C_A	C5_00110C_A	C5_00110C_A	THS1	Ca22chr5A_C_albicans_SC5314:12553-14674	37Control	37	OK	93.5999	217.095	1.21375	1.23062	0.09065	0.32215	no
C1_03680W_A	C1_03680W_A	C1_03680W_A	ENG1	Ca22chr1A_C_albicans_SC5314:761415-764853	37Control	37	OK	15.4448	35.8196	1.21363	1.46976	0.0334	0.175447	no
C1_03040W_A	C1_03040W_A	C1_03040W_A	C1_03040W_A	Ca22chr1A_C_albicans_SC5314:633765-634524	37Control	37	OK	34.8697	80.7829	1.21208	1.50478	0.03325	0.174983	no
C5_01430C_A	C5_01430C_A	C5_01430C_A	C5_01430C_A	Ca22chr5A_C_albicans_SC5314:319483-320866	37Control	37	OK	21.1086	48.8945	1.21184	1.55371	0.0282	0.158457	no
C6_00470C_A	C6_00470C_A	C6_00470C_A	FET99	Ca22chr6A_C_albicans_SC5314:83655-85536	37Control	37	OK	28.536	66.0598	1.21099	1.10199	0.1256	0.394148	no
C5_00120W_A	C5_00120W_A	C5_00120W_A	C5_00120W_A	Ca22chr5A_C_albicans_SC5314:14762-15059	37Control	37	OK	111.897	259.015	1.21086	1.41112	0.04155	0.200511	no
C2_04680W_A	C2_04680W_A	C2_04680W_A	TIM17	Ca22chr2A_C_albicans_SC5314:981048-981513	37Control	37	OK	196.115	453.915	1.21072	1.34796	0.0637	0.259751	no
CR_01320C_A	CR_01320C_A	CR_01320C_A	CR_01320C_A	Ca22chrRA_C_albicans_SC5314:313500-316497	37Control	37	OK	10.8102	25	1.20953	1.45066	0.03815	0.190295	no
C2_05310C_A	C2_05310C_A	C2_05310C_A	C2_05310C_A	Ca22chr2A_C_albicans_SC5314:1091742-1092969	37Control	37	OK	100.286	231.886	1.2093	0.031851	0.5321	0.843967	no
C3_03550C_A	C3_03550C_A	C3_03550C_A	ULP1	Ca22chr3A_C_albicans_SC5314:754423-755479	37Control	37	OK	26.9231	62.2346	1.20887	1.55624	0.02795	0.157711	no
CR_07950W_A	CR_07950W_A	CR_07950W_A	IMP4	Ca22chrRA_C_albicans_SC5314:1736934-1737786	37Control	37	OK	132.93	307.032	1.20772	1.43167	0.0424	0.203311	no
C1_01870C_A	C1_01870C_A	C1_01870C_A	CYS4	Ca22chr1A_C_albicans_SC5314:384789-386280	37Control	37	OK	168.178	388.152	1.20664	1.19088	0.084	0.30853	no
C7_00950W_A	C7_00950W_A	C7_00950W_A	YML6	Ca22chr7A_C_albicans_SC5314:200871-201708	37Control	37	OK	85.5211	197.377	1.2066	1.52362	0.02555	0.149359	no
CR_01550C_A	CR_01550C_A	CR_01550C_A	CR_01550C_A	Ca22chrRA_C_albicans_SC5314:355982-357224	37Control	37	OK	15.6443	36.0844	1.20574	1.50815	0.0241	0.1447	no
C1_13030C_A	C1_13030C_A	C1_13030C_A	C1_13030C_A	Ca22chr1A_C_albicans_SC5314:2836349-2838695	37Control	37	OK	49.4956	114.04	1.20416	1.33825	0.06755	0.268929	no
C2_03540W_A	C2_03540W_A	C2_03540W_A	RAD32	Ca22chr2A_C_albicans_SC5314:749769-751692	37Control	37	OK	21.0731	48.5446	1.20391	1.53834	0.0275	0.156107	no
C5_05400W_A	C5_05400W_A	C5_05400W_A	APM1	Ca22chr5A_C_albicans_SC5314:1168092-1169409	37Control	37	OK	38.3133	88.2218	1.20329	1.51277	0.02515	0.147847	no
C6_01690W_A	C6_01690W_A	C6_01690W_A	ACF2	Ca22chr6A_C_albicans_SC5314:354146-356351	37Control	37	OK	6.55279	15.0685	1.20136	1.42251	0.05005	0.225309	no
C7_02100W_A	C7_02100W_A	C7_02100W_A	C7_02100W_A	Ca22chr7A_C_albicans_SC5314:463551-464776	37Control	37	OK	148.383	339.792	1.19533	1.19466	0.1015	0.345643	no
C4_07090C_A	C4_07090C_A	C4_07090C_A	TRP4	Ca22chr4A_C_albicans_SC5314:1566663-1567773	37Control	37	OK	49.6481	113.54	1.19338	1.5379	0.0325	0.172725	no
C3_04370C_A	C3_04370C_A	C3_04370C_A	C3_04370C_A	Ca22chr3A_C_albicans_SC5314:907471-910834	37Control	37	OK	13.8839	31.7505	1.19337	1.53432	0.02925	0.162227	no
CR_03350C_A	CR_03350C_A	CR_03350C_A	CR_03350C_A	Ca22chrRA_C_albicans_SC5314:746466-748209	37Control	37	OK	35.6236	81.4462	1.19302	1.49601	0.026	0.151145	no
C4_04500C_A	C4_04500C_A	C4_04500C_A	C4_04500C_A	Ca22chr4A_C_albicans_SC5314:964067-964820	37Control	37	OK	95.3551	217.956	1.19266	1.50231	0.0282	0.158457	no
C1_12200W_A	C1_12200W_A	C1_12200W_A	MCD4	Ca22chr1A_C_albicans_SC5314:2661668-2664584	37Control	37	OK	5.12127	11.702	1.19218	1.40547	0.05475	0.237607	no
C2_00410C_A	C2_00410C_A	C2_00410C_A	C2_00410C_A	Ca22chr2A_C_albicans_SC5314:59131-62923	37Control	37	OK	13.1729	30.0686	1.19068	1.50427	0.0264	0.152669	no
C2_03000C_A	C2_03000C_A	C2_03000C_A	C2_03000C_A	Ca22chr2A_C_albicans_SC5314:602010-603051	37Control	37	OK	24.2248	55.2791	1.19025	1.48099	0.03995	0.195444	no
C2_00860C_A	C2_00860C_A	C2_00860C_A	C2_00860C_A	Ca22chr2A_C_albicans_SC5314:146137-147394	37Control	37	OK	4.54969	10.3666	1.18811	1.10332	0.1329	0.405372	no
C6_01980C_A	C6_01980C_A	C6_01980C_A	C6_01980C_A	Ca22chr6A_C_albicans_SC5314:403984-404632	37Control	37	OK	143.934	327.618	1.1866	1.42549	0.0469	0.216298	no
C4_02280W_A	C4_02280W_A	C4_02280W_A	IDI1	Ca22chr4A_C_albicans_SC5314:450085-450940	37Control	37	OK	113.76	258.764	1.18565	1.44592	0.03805	0.190197	no
CR_03090C_A	CR_03090C_A	CR_03090C_A	MLC1	Ca22chrRA_C_albicans_SC5314:701826-702325	37Control	37	OK	265.82	604.646	1.18564	1.24487	0.0784	0.295628	no
C2_09290W_A	C2_09290W_A	C2_09290W_A	C2_09290W_A	Ca22chr2A_C_albicans_SC5314:1898814-1899127	37Control	37	OK	256.679	583.721	1.18531	1.40988	0.05055	0.226477	no
C7_04330C_A	C7_04330C_A	C7_04330C_A	SYS1	Ca22chr7A_C_albicans_SC5314:940992-941499	37Control	37	OK	45.88	104.323	1.18512	1.40246	0.0541	0.236147	no
C6_04620C_A	C6_04620C_A	C6_04620C_A	NAG4	Ca22chr6A_C_albicans_SC5314:1025129-1026875	37Control	37	OK	0.3481	0.791027	1.18422	0.840005	0.22615	0.556584	no
C2_09910C_A	C2_09910C_A	C2_09910C_A	C2_09910C_A	Ca22chr2A_C_albicans_SC5314:2026824-2027007	37Control	37	OK	418.779	951.571	1.18412	1.26546	0.08325	0.306972	no
C2_08320C_A	C2_08320C_A	C2_08320C_A	C2_08320C_A	Ca22chr2A_C_albicans_SC5314:1679165-1679777	37Control	37	OK	12.116	27.5183	1.18348	1.2338	0.0637	0.259751	no
CR_07230W_A	CR_07230W_A	CR_07230W_A	CR_07230W_A	Ca22chrRA_C_albicans_SC5314:1576199-1576703	37Control	37	OK	183.402	416.425	1.18305	1.37021	0.05595	0.240214	no
CR_00640W_A	CR_00640W_A	CR_00640W_A	ACC1	Ca22chrRA_C_albicans_SC5314:155195-162011	37Control	37	OK	67.8679	154.039	1.1825	0.939065	0.1592	0.452882	no
CR_01570W_A	CR_01570W_A	CR_01570W_A	CR_01570W_A	Ca22chrRA_C_albicans_SC5314:358521-359118	37Control	37	OK	36.1455	82.0197	1.18216	1.42141	0.045	0.210525	no
C1_01940C_A	C1_01940C_A	C1_01940C_A	C1_01940C_A	Ca22chr1A_C_albicans_SC5314:402262-402769	37Control	37	OK	108.427	246.036	1.18214	1.49244	0.03345	0.175447	no
CR_08180C_A	CR_08180C_A	CR_08180C_A	TRM9	Ca22chrRA_C_albicans_SC5314:1777045-1777843	37Control	37	OK	51.6907	117.283	1.18202	1.54081	0.0221	0.13688	no
C1_04670W_A	C1_04670W_A	C1_04670W_A	HAT1	Ca22chr1A_C_albicans_SC5314:970916-972158	37Control	37	OK	30.7293	69.6658	1.18083	1.49149	0.0276	0.156345	no
C2_02740C_A	C2_02740C_A	C2_02740C_A	HPT1	Ca22chr2A_C_albicans_SC5314:546836-547478	37Control	37	OK	269.121	609.642	1.17971	1.27215	0.083	0.30635	no
C3_01450C_A	C3_01450C_A	C3_01450C_A	MET18	Ca22chr3A_C_albicans_SC5314:307885-311137	37Control	37	OK	2.96743	6.721	1.17946	1.29312	0.06915	0.273048	no
C2_02370C_A	C2_02370C_A	C2_02370C_A	HOM2	Ca22chr2A_C_albicans_SC5314:469528-470626	37Control	37	OK	188.048	425.746	1.17889	1.18162	0.1054	0.35387	no
C1_08520C_A	C1_08520C_A	C1_08520C_A	C1_08520C_A	Ca22chr1A_C_albicans_SC5314:1867124-1867568	37Control	37	OK	203.655	461.002	1.17865	1.5094	0.03095	0.167802	no
C5_02170C_A	C5_02170C_A	C5_02170C_A	GCD11	Ca22chr5A_C_albicans_SC5314:482347-483952	37Control	37	OK	189.014	427.637	1.17789	1.14123	0.1153	0.373589	no
C3_03280C_A	C3_03280C_A	C3_03280C_A	HTA3	Ca22chr3A_C_albicans_SC5314:693794-694196	37Control	37	OK	268.027	606.339	1.17775	1.34431	0.0519	0.230442	no
C1_01160C_A	C1_01160C_A	C1_01160C_A	C1_01160C_A	Ca22chr1A_C_albicans_SC5314:235076-235889	37Control	37	OK	73.8855	167.107	1.17741	1.504	0.03025	0.165579	no
C2_06540C_A	C2_06540C_A	C2_06540C_A	SPF1	Ca22chr2A_C_albicans_SC5314:1325585-1329257	37Control	37	OK	27.3247	61.7804	1.17694	1.33785	0.0682	0.270602	no
C3_04810C_A	C3_04810C_A	C3_04810C_A	C3_04810C_A	Ca22chr3A_C_albicans_SC5314:1023133-1024411	37Control	37	OK	1055.67	2386.49	1.17674	0.964284	0.17295	0.476523	no
CR_05780W_A	CR_05780W_A	CR_05780W_A	VMA2	Ca22chrRA_C_albicans_SC5314:1224231-1225770	37Control	37	OK	120.115	271.432	1.17617	1.14322	0.0891	0.318867	no
C1_05360C_A	C1_05360C_A	C1_05360C_A	C1_05360C_A	Ca22chr1A_C_albicans_SC5314:1123870-1125682	37Control	37	OK	26.9582	60.896	1.17562	1.47613	0.02785	0.157429	no
CR_04050C_A	CR_04050C_A	CR_04050C_A	MEX67	Ca22chrRA_C_albicans_SC5314:911097-912951	37Control	37	OK	36.6897	82.8644	1.17538	1.41599	0.04775	0.218082	no
C4_00360C_A	C4_00360C_A	C4_00360C_A	RCH1	Ca22chr4A_C_albicans_SC5314:54075-55311	37Control	37	OK	18.3049	41.2879	1.17349	1.29681	0.07435	0.285909	no
C2_02700C_A	C2_02700C_A	C2_02700C_A	C2_02700C_A	Ca22chr2A_C_albicans_SC5314:539907-540801	37Control	37	OK	19.6176	44.1132	1.16906	1.40452	0.0455	0.212074	no
C4_03530W_A	C4_03530W_A	C4_03530W_A	C4_03530W_A	Ca22chr4A_C_albicans_SC5314:750745-752716	37Control	37	OK	2.76163	6.20987	1.16904	1.15619	0.0924	0.326085	no
C2_04650C_A	C2_04650C_A	C2_04650C_A	RPB4	Ca22chr2A_C_albicans_SC5314:975239-976046	37Control	37	OK	47.4833	106.748	1.16872	1.43861	0.04905	0.222348	no
C2_03160C_A	C2_03160C_A	C2_03160C_A	RNR1	Ca22chr2A_C_albicans_SC5314:639343-641908	37Control	37	OK	69.874	157.046	1.16836	0.998086	0.1626	0.459501	no
C1_05290W_A	C1_05290W_A	C1_05290W_A	GRS1	Ca22chr1A_C_albicans_SC5314:1111171-1113130	37Control	37	OK	105.073	236.124	1.16816	1.17648	0.10535	0.353828	no
C1_03770W_A	C1_03770W_A	C1_03770W_A	SKO1	Ca22chr1A_C_albicans_SC5314:788295-790142	37Control	37	OK	24.7287	55.5249	1.16695	1.49118	0.03185	0.17091	no
C1_02640C_A	C1_02640C_A	C1_02640C_A	TOM20	Ca22chr1A_C_albicans_SC5314:552857-553373	37Control	37	OK	333.141	747.865	1.16664	1.30828	0.07325	0.283299	no
C3_00370C_A	C3_00370C_A	C3_00370C_A	BUD21	Ca22chr3A_C_albicans_SC5314:52682-53342	37Control	37	OK	99.5664	223.373	1.16572	1.5019	0.0336	0.175842	no
C1_00540C_A	C1_00540C_A	C1_00540C_A	C1_00540C_A	Ca22chr1A_C_albicans_SC5314:85079-87248	37Control	37	OK	21.3605	47.9138	1.1655	1.40439	0.0479	0.218397	no
C5_01270W_A	C5_01270W_A	C5_01270W_A	SGE1	Ca22chr5A_C_albicans_SC5314:286733-288617	37Control	37	OK	19.2791	43.2399	1.16532	1.48763	0.0332	0.174964	no
C1_04880C_A	C1_04880C_A	C1_04880C_A	MRPL37	Ca22chr1A_C_albicans_SC5314:1015096-1015459	37Control	37	OK	199.247	446.695	1.16473	1.51722	0.02335	0.142145	no
C3_05880C_A	C3_05880C_A	C3_05880C_A	C3_05880C_A	Ca22chr3A_C_albicans_SC5314:1318840-1320373	37Control	37	OK	55.1081	123.479	1.16393	1.42384	0.0446	0.209539	no
C1_14430C_A	C1_14430C_A	C1_14430C_A	C1_14430C_A	Ca22chr1A_C_albicans_SC5314:3169829-3171577	37Control	37	OK	21.6578	48.5226	1.16377	0.586744	0.48875	0.817549	no
C4_06830C_A	C4_06830C_A	C4_06830C_A	CCT6	Ca22chr4A_C_albicans_SC5314:1527752-1529432	37Control	37	OK	84.2452	188.742	1.16375	1.29565	0.06315	0.258572	no
C1_05080W_A	C1_05080W_A	C1_05080W_A	GPT1	Ca22chr1A_C_albicans_SC5314:1064008-1065736	37Control	37	OK	3.42489	7.67232	1.1636	1.22122	0.07055	0.275801	no
C1_06930W_A	C1_06930W_A	C1_06930W_A	PGA63	Ca22chr1A_C_albicans_SC5314:1475648-1479446	37Control	37	OK	22.426	50.198	1.16246	1.29189	0.07605	0.290019	no
C3_05900W_A	C3_05900W_A	C3_05900W_A	C3_05900W_A	Ca22chr3A_C_albicans_SC5314:1323691-1324687	37Control	37	OK	30.7199	68.7609	1.16242	1.37335	0.0585	0.246553	no
C5_05320C_A	C5_05320C_A	C5_05320C_A	HIS1	Ca22chr5A_C_albicans_SC5314:1153177-1154074	37Control	37	OK	154.152	344.808	1.16144	1.04594	0.12005	0.38279	no
C2_00110W_A	C2_00110W_A	C2_00110W_A	C2_00110W_A	Ca22chr2A_C_albicans_SC5314:14822-15446	37Control	37	OK	43.2594	96.6885	1.16033	1.45509	0.0305	0.166512	no
C2_05050C_A	C2_05050C_A	C2_05050C_A	C2_05050C_A	Ca22chr2A_C_albicans_SC5314:1045869-1047258	37Control	37	OK	21.1326	47.2039	1.15944	1.48888	0.0356	0.182804	no
C2_04960C_A	C2_04960C_A	C2_04960C_A	C2_04960C_A	Ca22chr2A_C_albicans_SC5314:1034742-1035171	37Control	37	OK	111.154	247.986	1.1577	1.48152	0.03425	0.177958	no
C1_14490C_A	C1_14490C_A	C1_14490C_A	SAM35	Ca22chr1A_C_albicans_SC5314:3176296-3177333	37Control	37	OK	21.5892	48.1553	1.15739	1.09443	0.122	0.387107	no
C7_03650W_A	C7_03650W_A	C7_03650W_A	C7_03650W_A	Ca22chr7A_C_albicans_SC5314:811481-812438	37Control	37	OK	26.7257	59.5776	1.15654	1.35632	0.056	0.240264	no
C1_11030W_A	C1_11030W_A	C1_11030W_A	RPL82	Ca22chr1A_C_albicans_SC5314:2432309-2433429	37Control	37	OK	509.787	1135.8	1.15574	1.12939	0.12135	0.38563	no
C1_11110C_A	C1_11110C_A	C1_11110C_A	C1_11110C_A	Ca22chr1A_C_albicans_SC5314:2446098-2446473	37Control	37	OK	127.169	282.669	1.15236	1.48088	0.0362	0.184627	no
C7_00320C_A	C7_00320C_A	C7_00320C_A	PMR1	Ca22chr7A_C_albicans_SC5314:48460-51214	37Control	37	OK	22.8688	50.8215	1.15206	1.44655	0.02955	0.16317	no
C2_05980C_A	C2_05980C_A	C2_05980C_A	C2_05980C_A	Ca22chr2A_C_albicans_SC5314:1219014-1219995	37Control	37	OK	26.1104	57.917	1.14936	1.42835	0.0426	0.20401	no
C4_04800W_A	C4_04800W_A	C4_04800W_A	C4_04800W_A	Ca22chr4A_C_albicans_SC5314:1033240-1034341	37Control	37	OK	263.357	583.522	1.14777	1.07085	0.1191	0.380987	no
C3_05530W_A	C3_05530W_A	C3_05530W_A	OST1	Ca22chr3A_C_albicans_SC5314:1240040-1241769	37Control	37	OK	45.5169	100.822	1.14734	1.19797	0.08305	0.306475	no
C5_05340W_A	C5_05340W_A	C5_05340W_A	C5_05340W_A	Ca22chr5A_C_albicans_SC5314:1155734-1156982	37Control	37	OK	106.957	236.864	1.14703	1.23015	0.09115	0.323377	no
C3_00980W_A	C3_00980W_A	C3_00980W_A	FLC1	Ca22chr3A_C_albicans_SC5314:198696-201123	37Control	37	OK	27.9469	61.8514	1.14612	1.38469	0.04345	0.20661	no
C3_00310C_A	C3_00310C_A	C3_00310C_A	C3_00310C_A	Ca22chr3A_C_albicans_SC5314:42950-43340	37Control	37	OK	103.099	228.151	1.14596	1.45554	0.0341	0.177473	no
C5_04300C_A	C5_04300C_A	C5_04300C_A	C5_04300C_A	Ca22chr5A_C_albicans_SC5314:954128-955433	37Control	37	OK	157.478	348.394	1.14557	0.995728	0.17155	0.474331	no
C2_00260C_A	C2_00260C_A	C2_00260C_A	MUQ1	Ca22chr2A_C_albicans_SC5314:33670-34845	37Control	37	OK	55.7899	123.37	1.14492	1.1874	0.09695	0.336538	no
C2_07600C_A	C2_07600C_A	C2_07600C_A	MSC7	Ca22chr2A_C_albicans_SC5314:1549799-1551644	37Control	37	OK	34.2692	75.7141	1.14365	1.2845	0.0554	0.238832	no
C2_03100W_A	C2_03100W_A	C2_03100W_A	EFT2	Ca22chr2A_C_albicans_SC5314:623497-626224	37Control	37	OK	886.81	1957.65	1.14243	0.830296	0.21855	0.547319	no
C3_01830C_A	C3_01830C_A	C3_01830C_A	MNT2	Ca22chr3A_C_albicans_SC5314:405199-406585	37Control	37	OK	41.2595	91.0106	1.14131	1.43476	0.0326	0.173061	no
C2_00840W_A	C2_00840W_A	C2_00840W_A	C2_00840W_A	Ca22chr2A_C_albicans_SC5314:142771-144541	37Control	37	OK	23.1871	51.1366	1.14103	1.42978	0.03305	0.174662	no
C1_13360C_A	C1_13360C_A	C1_13360C_A	RMP1	Ca22chr1A_C_albicans_SC5314:2913582-2914710	37Control	37	OK	7.77413	17.1436	1.14092	1.21712	0.08015	0.299886	no
C2_09950W_A	C2_09950W_A	C2_09950W_A	FCY21	Ca22chr2A_C_albicans_SC5314:2034729-2036274	37Control	37	OK	173.926	383.456	1.14059	1.09754	0.12595	0.394731	no
CR_06240C_A	CR_06240C_A	CR_06240C_A	ZCF19	Ca22chrRA_C_albicans_SC5314:1328223-1330083	37Control	37	OK	2.8119	6.19643	1.13989	1.08445	0.1205	0.383641	no
C6_02090C_A	C6_02090C_A	C6_02090C_A	C6_02090C_A	Ca22chr6A_C_albicans_SC5314:426471-429609	37Control	37	OK	7.35665	16.2112	1.13987	1.42053	0.04645	0.215171	no
C7_02970W_A	C7_02970W_A	C7_02970W_A	ECM39	Ca22chr7A_C_albicans_SC5314:642585-644340	37Control	37	OK	19.7685	43.5374	1.13905	1.44391	0.04215	0.202679	no
C6_01530C_A	C6_01530C_A	C6_01530C_A	C6_01530C_A	Ca22chr6A_C_albicans_SC5314:310349-310526	37Control	37	OK	149.964	330.237	1.13889	0.798002	0.27295	0.615248	no
C4_02090C_A	C4_02090C_A	C4_02090C_A	C4_02090C_A	Ca22chr4A_C_albicans_SC5314:417122-417845	37Control	37	OK	71.1482	156.582	1.13802	1.44423	0.0413	0.200022	no
CR_01650W_A	CR_01650W_A	CR_01650W_A	URA5	Ca22chrRA_C_albicans_SC5314:377248-377905	37Control	37	OK	124.696	274.224	1.13694	1.36803	0.04355	0.206668	no
C3_02170C_A	C3_02170C_A	C3_02170C_A	LAP41	Ca22chr3A_C_albicans_SC5314:470416-471970	37Control	37	OK	53.7131	118.121	1.13691	1.17424	0.08025	0.300022	no
C3_00740W_A	C3_00740W_A	C3_00740W_A	C3_00740W_A	Ca22chr3A_C_albicans_SC5314:137629-139981	37Control	37	OK	12.8995	28.3639	1.13675	0.418926	0.69795	0.921297	no
C2_03070C_A	C2_03070C_A	C2_03070C_A	SMP3	Ca22chr2A_C_albicans_SC5314:618201-619698	37Control	37	OK	10.7687	23.6656	1.13594	1.33361	0.0642	0.260605	no
C1_08560W_A	C1_08560W_A	C1_08560W_A	TCP1	Ca22chr1A_C_albicans_SC5314:1872857-1874522	37Control	37	OK	78.608	172.713	1.13563	1.28169	0.0729	0.282351	no
C2_07010W_A	C2_07010W_A	C2_07010W_A	C2_07010W_A	Ca22chr2A_C_albicans_SC5314:1437379-1438551	37Control	37	OK	149.864	329.196	1.1353	1.15382	0.09085	0.322556	no
C4_00940W_A	C4_00940W_A	C4_00940W_A	C4_00940W_A	Ca22chr4A_C_albicans_SC5314:168440-169364	37Control	37	OK	9.14285	20.0778	1.13488	1.22539	0.09145	0.323832	no
C6_02410W_A	C6_02410W_A	C6_02410W_A	C6_02410W_A	Ca22chr6A_C_albicans_SC5314:499150-500542	37Control	37	OK	39.3284	86.2869	1.13357	1.46105	0.039	0.192536	no
C1_06700W_A	C1_06700W_A	C1_06700W_A	C1_06700W_A	Ca22chr1A_C_albicans_SC5314:1433429-1435013	37Control	37	OK	12.014	26.3305	1.13201	1.29189	0.07595	0.289931	no
C5_00820W_A	C5_00820W_A	C5_00820W_A	C5_00820W_A	Ca22chr5A_C_albicans_SC5314:194338-195190	37Control	37	OK	132.949	291.26	1.13143	1.34116	0.06	0.250632	no
CR_06680C_A	CR_06680C_A	CR_06680C_A	CR_06680C_A	Ca22chrRA_C_albicans_SC5314:1436295-1439613	37Control	37	OK	13.7648	30.1442	1.13089	1.37219	0.0533	0.234229	no
C1_00110W_A	C1_00110W_A	C1_00110W_A	CCT8	Ca22chr1A_C_albicans_SC5314:17337-21714	37Control	37	OK	77.2407	169.053	1.13004	0.8739	0.23435	0.567544	no
CR_10630W_A	CR_10630W_A	CR_10630W_A	CR_10630W_A	Ca22chrRA_C_albicans_SC5314:2253073-2254015	37Control	37	OK	9.61163	21.0212	1.12899	1.22436	0.0898	0.320581	no
C3_03110W_A	C3_03110W_A	C3_03110W_A	C3_03110W_A	Ca22chr3A_C_albicans_SC5314:660874-662410	37Control	37	OK	18.2173	39.8324	1.12863	1.40061	0.0531	0.233623	no
C3_03900C_A	C3_03900C_A	C3_03900C_A	HTB1	Ca22chr3A_C_albicans_SC5314:817865-818258	37Control	37	OK	936.835	2048.08	1.12841	0.976408	0.1601	0.454824	no
C1_02090C_A	C1_02090C_A	C1_02090C_A	C1_02090C_A	Ca22chr1A_C_albicans_SC5314:429370-431994	37Control	37	OK	14.7518	32.2332	1.12766	0.919441	0.18725	0.499838	no
C5_03750W_A	C5_03750W_A	C5_03750W_A	FAV2	Ca22chr5A_C_albicans_SC5314:829496-829922	37Control	37	OK	45.1854	98.6684	1.12673	1.31369	0.05505	0.23836	no
C1_09990W_A	C1_09990W_A	C1_09990W_A	SAC1	Ca22chr1A_C_albicans_SC5314:2180945-2182802	37Control	37	OK	26.0765	56.933	1.12651	1.37732	0.0551	0.238412	no
C7_02150C_A	C7_02150C_A	C7_02150C_A	ECM42	Ca22chr7A_C_albicans_SC5314:470402-471722	37Control	37	OK	16.8174	36.7106	1.12624	1.40603	0.0343	0.178169	no
C1_08400C_A	C1_08400C_A	C1_08400C_A	GCV2	Ca22chr1A_C_albicans_SC5314:1846392-1849392	37Control	37	OK	94.7487	206.81	1.12613	1.07141	0.12765	0.397424	no
C1_04890W_A	C1_04890W_A	C1_04890W_A	YBN5	Ca22chr1A_C_albicans_SC5314:1015785-1016976	37Control	37	OK	305.544	666.668	1.12559	1.05635	0.11675	0.376732	no
C2_01830W_A	C2_01830W_A	C2_01830W_A	PRP39	Ca22chr2A_C_albicans_SC5314:336551-338495	37Control	37	OK	6.44847	14.051	1.12365	1.26586	0.07865	0.296275	no
C2_02420C_A	C2_02420C_A	C2_02420C_A	C2_02420C_A	Ca22chr2A_C_albicans_SC5314:479260-481102	37Control	37	OK	27.6367	60.2184	1.12362	1.37458	0.04945	0.223946	no
C2_10010C_A	C2_10010C_A	C2_10010C_A	C2_10010C_A	Ca22chr2A_C_albicans_SC5314:2049480-2050200	37Control	37	OK	58.4731	127.409	1.12362	1.33364	0.0626	0.257046	no
CR_06020W_A	CR_06020W_A	CR_06020W_A	CR_06020W_A	Ca22chrRA_C_albicans_SC5314:1280964-1282092	37Control	37	OK	11.1323	24.2272	1.12188	1.30989	0.06155	0.25451	no
C5_03120W_A	C5_03120W_A	C5_03120W_A	C5_03120W_A	Ca22chr5A_C_albicans_SC5314:691291-692740	37Control	37	OK	7.65121	16.6439	1.12123	1.30557	0.05885	0.247199	no
C3_01680C_A	C3_01680C_A	C3_01680C_A	C3_01680C_A	Ca22chr3A_C_albicans_SC5314:362631-363738	37Control	37	OK	24.8521	54.0293	1.12037	1.40136	0.05025	0.225831	no
CR_10400W_A	CR_10400W_A	CR_10400W_A	CR_10400W_A	Ca22chrRA_C_albicans_SC5314:2217314-2217947	37Control	37	OK	114.406	248.708	1.1203	1.42768	0.03825	0.19064	no
C2_08600W_A	C2_08600W_A	C2_08600W_A	GTR1	Ca22chr2A_C_albicans_SC5314:1749985-1751044	37Control	37	OK	10.8331	23.5448	1.11996	1.29786	0.05265	0.232403	no
CR_05550C_A	CR_05550C_A	CR_05550C_A	CR_05550C_A	Ca22chrRA_C_albicans_SC5314:1181748-1185222	37Control	37	OK	19.9765	43.4154	1.1199	1.37598	0.04725	0.216974	no
C3_04230W_A	C3_04230W_A	C3_04230W_A	C3_04230W_A	Ca22chr3A_C_albicans_SC5314:877508-880106	37Control	37	OK	6.36788	13.8243	1.11832	1.33507	0.0556	0.239202	no
C1_07430W_A	C1_07430W_A	C1_07430W_A	PHO100	Ca22chr1A_C_albicans_SC5314:1609044-1610016	37Control	37	OK	4.6141	10.0164	1.11824	0.993373	0.1734	0.477342	no
C3_02670W_A	C3_02670W_A	C3_02670W_A	C3_02670W_A	Ca22chr3A_C_albicans_SC5314:577677-578433	37Control	37	OK	27.0127	58.6386	1.11821	1.31617	0.0686	0.271731	no
C2_06640C_A	C2_06640C_A	C2_06640C_A	VAS1	Ca22chr2A_C_albicans_SC5314:1350860-1354220	37Control	37	OK	56.4718	122.275	1.11453	1.18784	0.08485	0.31014	no
C6_03080C_A	C6_03080C_A	C6_03080C_A	ADO1	Ca22chr6A_C_albicans_SC5314:646611-647655	37Control	37	OK	145.848	315.759	1.11435	1.24986	0.07895	0.29687	no
C2_05400W_A	C2_05400W_A	C2_05400W_A	C2_05400W_A	Ca22chr2A_C_albicans_SC5314:1108619-1109912	37Control	37	OK	6.84291	14.7878	1.11173	1.22311	0.07895	0.29687	no
C1_02870W_A	C1_02870W_A	C1_02870W_A	YPT7	Ca22chr1A_C_albicans_SC5314:604675-605542	37Control	37	OK	45.323	97.8839	1.11083	1.41913	0.047	0.216547	no
C5_02700W_A	C5_02700W_A	C5_02700W_A	CTA7	Ca22chr5A_C_albicans_SC5314:607796-610301	37Control	37	OK	15.1562	32.7272	1.11059	1.41454	0.042	0.202268	no
C6_01560W_A	C6_01560W_A	C6_01560W_A	C6_01560W_A	Ca22chr6A_C_albicans_SC5314:319705-320740	37Control	37	OK	4.43721	9.57599	1.10977	1.04555	0.14335	0.424461	no
C4_02010C_A	C4_02010C_A	C4_02010C_A	HSX11	Ca22chr4A_C_albicans_SC5314:394831-396466	37Control	37	OK	18.0351	38.9198	1.10969	1.3235	0.06415	0.260605	no
C7_03910W_A	C7_03910W_A	C7_03910W_A	OGG1	Ca22chr7A_C_albicans_SC5314:860160-861222	37Control	37	OK	20.7531	44.7674	1.10912	1.30614	0.0589	0.247354	no
C2_04820W_A	C2_04820W_A	C2_04820W_A	C2_04820W_A	Ca22chr2A_C_albicans_SC5314:1008543-1009959	37Control	37	OK	40.8149	88.0367	1.10901	1.41036	0.0377	0.189355	no
CR_05130C_A	CR_05130C_A	CR_05130C_A	CR_05130C_A	Ca22chrRA_C_albicans_SC5314:1113310-1114213	37Control	37	OK	49.8312	107.464	1.10873	1.44289	0.02945	0.162809	no
CR_08320W_A	CR_08320W_A	CR_08320W_A	ATS1	Ca22chrRA_C_albicans_SC5314:1802700-1803603	37Control	37	OK	26.7236	57.6107	1.10822	1.39979	0.0381	0.190197	no
C3_05180W_A	C3_05180W_A	C3_05180W_A	RHB1	Ca22chr3A_C_albicans_SC5314:1126467-1127022	37Control	37	OK	75.1547	161.991	1.10798	1.38435	0.05665	0.241622	no
CR_05390W_A	CR_05390W_A	CR_05390W_A	PST3	Ca22chrRA_C_albicans_SC5314:1157976-1158576	37Control	37	OK	567.864	1222.03	1.10566	0.924675	0.1269	0.39605	no
CR_10490W_A	CR_10490W_A	CR_10490W_A	EIF4E	Ca22chrRA_C_albicans_SC5314:2230202-2230832	37Control	37	OK	389.354	837.691	1.10534	1.11266	0.1281	0.397424	no
CR_08640C_A	CR_08640C_A	CR_08640C_A	CR_08640C_A	Ca22chrRA_C_albicans_SC5314:1859508-1861272	37Control	37	OK	57.9973	124.766	1.10517	1.31718	0.06495	0.262574	no
C3_05380W_A	C3_05380W_A	C3_05380W_A	C3_05380W_A	Ca22chr3A_C_albicans_SC5314:1195335-1197177	37Control	37	OK	17.7682	38.1871	1.10379	1.31174	0.0705	0.27572	no
C7_00220W_A	C7_00220W_A	C7_00220W_A	C7_00220W_A	Ca22chr7A_C_albicans_SC5314:27137-31618	37Control	37	OK	11.2001	24.0178	1.10059	0.510682	0.51775	0.8349	no
C1_01360C_A	C1_01360C_A	C1_01360C_A	C1_01360C_A	Ca22chr1A_C_albicans_SC5314:265482-267465	37Control	37	OK	41.3572	88.6465	1.09992	1.25723	0.0758	0.289725	no
C4_05320W_A	C4_05320W_A	C4_05320W_A	LYS1	Ca22chr4A_C_albicans_SC5314:1158924-1160073	37Control	37	OK	103.435	221.7	1.09987	1.20752	0.076	0.290004	no
C1_07910C_A	C1_07910C_A	C1_07910C_A	MRPL3	Ca22chr1A_C_albicans_SC5314:1723763-1724978	37Control	37	OK	74.3979	159.237	1.09785	1.32951	0.0547	0.237607	no
C6_01470W_A	C6_01470W_A	C6_01470W_A	C6_01470W_A	Ca22chr6A_C_albicans_SC5314:294634-296263	37Control	37	OK	3.57202	7.64496	1.09777	1.14426	0.0865	0.313554	no
CR_03990C_A	CR_03990C_A	CR_03990C_A	GCD1	Ca22chrRA_C_albicans_SC5314:901284-902727	37Control	37	OK	70.0244	149.706	1.0962	1.29014	0.06665	0.266983	no
CR_09920W_A	CR_09920W_A	CR_09920W_A	CR_09920W_A	Ca22chrRA_C_albicans_SC5314:2122775-2124491	37Control	37	OK	221.423	473.282	1.0959	0.723626	0.2612	0.60012	no
C1_04300C_A	C1_04300C_A	C1_04300C_A	SSA2	Ca22chr1A_C_albicans_SC5314:890372-892310	37Control	37	OK	374.134	799.021	1.09468	0.713836	0.2839	0.627686	no
C1_10250C_A	C1_10250C_A	C1_10250C_A	C1_10250C_A	Ca22chr1A_C_albicans_SC5314:2264986-2265808	37Control	37	OK	27.6953	59.096	1.09342	1.34024	0.0544	0.236853	no
C5_02920W_A	C5_02920W_A	C5_02920W_A	C5_02920W_A	Ca22chr5A_C_albicans_SC5314:648509-649700	37Control	37	OK	29.8589	63.6527	1.09206	1.36545	0.05885	0.247199	no
C5_03390C_A	C5_03390C_A	C5_03390C_A	FUR1	Ca22chr5A_C_albicans_SC5314:766243-766900	37Control	37	OK	120.59	256.907	1.09113	1.32434	0.0613	0.253867	no
C3_01600W_A	C3_01600W_A	C3_01600W_A	PPH21	Ca22chr3A_C_albicans_SC5314:351733-352816	37Control	37	OK	49.8989	106.281	1.0908	1.37021	0.04045	0.19702	no
C2_00620C_A	C2_00620C_A	C2_00620C_A	C2_00620C_A	Ca22chr2A_C_albicans_SC5314:98605-99577	37Control	37	OK	18.435	39.2589	1.09057	1.2859	0.0744	0.286043	no
C3_07920W_A	C3_07920W_A	C3_07920W_A	C3_07920W_A	Ca22chr3A_C_albicans_SC5314:1781079-1784314	37Control	37	OK	14.73	31.3665	1.09047	0.719867	0.2984	0.645351	no
C4_04820C_A	C4_04820C_A	C4_04820C_A	C4_04820C_A	Ca22chr4A_C_albicans_SC5314:1036181-1036958	37Control	37	OK	113.025	240.662	1.09037	1.31309	0.06435	0.260933	no
CR_01260W_A	CR_01260W_A	CR_01260W_A	CR_01260W_A	Ca22chrRA_C_albicans_SC5314:300878-303074	37Control	37	OK	12.2386	26.0592	1.09035	1.39252	0.04575	0.213081	no
C3_07810C_A	C3_07810C_A	C3_07810C_A	SEC61	Ca22chr3A_C_albicans_SC5314:1773914-1775354	37Control	37	OK	168.92	359.331	1.08897	0.955614	0.17505	0.479992	no
C2_06410W_A	C2_06410W_A	C2_06410W_A	C2_06410W_A	Ca22chr2A_C_albicans_SC5314:1304758-1304860	37Control	37	OK	141.494	300.968	1.08887	0.786166	0.28985	0.636246	no
C4_05160C_A	C4_05160C_A	C4_05160C_A	C4_05160C_A	Ca22chr4A_C_albicans_SC5314:1117382-1118930	37Control	37	OK	12.1715	25.8794	1.08829	1.35662	0.0423	0.203141	no
C1_10650W_A	C1_10650W_A	C1_10650W_A	APN2	Ca22chr1A_C_albicans_SC5314:2360938-2362294	37Control	37	OK	13.9439	29.6327	1.08756	1.31324	0.0515	0.229423	no
C3_04660C_A	C3_04660C_A	C3_04660C_A	ARG11	Ca22chr3A_C_albicans_SC5314:990297-991251	37Control	37	OK	11.5779	24.599	1.08723	1.15671	0.1076	0.358318	no
C6_04520W_A	C6_04520W_A	C6_04520W_A	ILS1	Ca22chr6A_C_albicans_SC5314:1005226-1008493	37Control	37	OK	76.5494	162.563	1.08654	1.03019	0.14265	0.422854	no
C2_09490W_A	C2_09490W_A	C2_09490W_A	PHO13	Ca22chr2A_C_albicans_SC5314:1940850-1941816	37Control	37	OK	14.3588	30.4359	1.08384	1.21777	0.08535	0.311303	no
C1_09350W_A	C1_09350W_A	C1_09350W_A	C1_09350W_A	Ca22chr1A_C_albicans_SC5314:2060784-2061315	37Control	37	OK	218.499	462.534	1.08194	1.31167	0.058	0.245325	no
C1_09750W_A	C1_09750W_A	C1_09750W_A	C1_09750W_A	Ca22chr1A_C_albicans_SC5314:2139717-2140614	37Control	37	OK	54.2698	114.717	1.07986	1.3734	0.05225	0.231396	no
C4_06920C_A	C4_06920C_A	C4_06920C_A	CSA2	Ca22chr4A_C_albicans_SC5314:1539949-1540393	37Control	37	OK	2.9667	6.26368	1.07815	0.793999	0.26205	0.601256	no
C6_04450W_A	C6_04450W_A	C6_04450W_A	C6_04450W_A	Ca22chr6A_C_albicans_SC5314:991301-992492	37Control	37	OK	29.9506	63.224	1.07789	1.36864	0.05255	0.232125	no
C1_00830W_A	C1_00830W_A	C1_00830W_A	C1_00830W_A	Ca22chr1A_C_albicans_SC5314:158724-160524	37Control	37	OK	13.2077	27.8788	1.07779	1.37378	0.0473	0.216974	no
C1_08090C_A	C1_08090C_A	C1_08090C_A	FUN12	Ca22chr1A_C_albicans_SC5314:1763703-1766757	37Control	37	OK	73.6319	155.359	1.0772	1.04924	0.1358	0.41089	no
C1_14380C_A	C1_14380C_A	C1_14380C_A	C1_14380C_A	Ca22chr1A_C_albicans_SC5314:3165463-3167263	37Control	37	OK	11.633	24.5385	1.07682	1.32847	0.0568	0.241988	no
C5_00740W_A	C5_00740W_A	C5_00740W_A	CTF8	Ca22chr5A_C_albicans_SC5314:175544-176033	37Control	37	OK	25.1718	53.0669	1.076	1.15314	0.09795	0.338822	no
CR_10640W_A	CR_10640W_A	CR_10640W_A	CR_10640W_A	Ca22chrRA_C_albicans_SC5314:2254170-2255601	37Control	37	OK	16.6198	35.0345	1.07587	1.32848	0.06235	0.256411	no
C5_02440C_A	C5_02440C_A	C5_02440C_A	C5_02440C_A	Ca22chr5A_C_albicans_SC5314:537706-538597	37Control	37	OK	40.5953	85.5716	1.07582	1.37503	0.0518	0.230107	no
C2_10770W_A	C2_10770W_A	C2_10770W_A	RPC11	Ca22chr2A_C_albicans_SC5314:2213263-2215209	37Control	37	OK	258.572	544.594	1.07462	1.0759	0.13435	0.407813	no
C5_01020C_A	C5_01020C_A	C5_01020C_A	C5_01020C_A	Ca22chr5A_C_albicans_SC5314:222659-222935	37Control	37	OK	103.724	218.249	1.07322	1.14493	0.10965	0.362453	no
C6_02870W_A	C6_02870W_A	C6_02870W_A	RNH1	Ca22chr6A_C_albicans_SC5314:594265-594967	37Control	37	OK	85.3286	179.477	1.0727	1.37565	0.0495	0.223957	no
C1_11000C_A	C1_11000C_A	C1_11000C_A	C1_11000C_A	Ca22chr1A_C_albicans_SC5314:2426348-2426756	37Control	37	OK	255.712	537.532	1.07183	1.29602	0.06395	0.260207	no
C1_10690W_A	C1_10690W_A	C1_10690W_A	C1_10690W_A	Ca22chr1A_C_albicans_SC5314:2373906-2374881	37Control	37	OK	36.55	76.7139	1.06962	1.31971	0.0637	0.259751	no
C1_12770W_A	C1_12770W_A	C1_12770W_A	RPG1A	Ca22chr1A_C_albicans_SC5314:2782397-2785190	37Control	37	OK	49.378	103.631	1.06951	1.19269	0.09055	0.322093	no
C7_01220W_A	C7_01220W_A	C7_01220W_A	GCN3	Ca22chr7A_C_albicans_SC5314:254403-255339	37Control	37	OK	73.5659	154.288	1.06852	1.36531	0.04855	0.220666	no
C6_04360C_A	C6_04360C_A	C6_04360C_A	GLE2	Ca22chr6A_C_albicans_SC5314:964394-965546	37Control	37	OK	49.2336	103.237	1.06824	1.28851	0.06525	0.263278	no
CR_02550C_A	CR_02550C_A	CR_02550C_A	CR_02550C_A	Ca22chrRA_C_albicans_SC5314:568817-569693	37Control	37	OK	69.4429	145.486	1.06698	1.36123	0.05075	0.226995	no
C1_03780C_A	C1_03780C_A	C1_03780C_A	HMG1	Ca22chr1A_C_albicans_SC5314:790363-793585	37Control	37	OK	33.2405	69.5723	1.06557	1.077	0.1304	0.401255	no
C2_06080C_A	C2_06080C_A	C2_06080C_A	C2_06080C_A	Ca22chr2A_C_albicans_SC5314:1241413-1242331	37Control	37	OK	47.7576	99.9071	1.06486	1.35195	0.05655	0.241578	no
C1_02900C_A	C1_02900C_A	C1_02900C_A	C1_02900C_A	Ca22chr1A_C_albicans_SC5314:607806-609984	37Control	37	OK	13.7675	28.7513	1.06236	1.32561	0.06885	0.272347	no
C1_11230W_A	C1_11230W_A	C1_11230W_A	FGR39	Ca22chr1A_C_albicans_SC5314:2469708-2470272	37Control	37	OK	43.4196	90.6464	1.0619	1.24664	0.0854	0.311425	no
C5_00680W_A	C5_00680W_A	C5_00680W_A	RMT2	Ca22chr5A_C_albicans_SC5314:156799-158155	37Control	37	OK	29.2388	60.9948	1.0608	1.37987	0.0378	0.189554	no
C1_11910W_A	C1_11910W_A	C1_11910W_A	C1_11910W_A	Ca22chr1A_C_albicans_SC5314:2605722-2606970	37Control	37	OK	8.7449	18.2335	1.06008	1.16062	0.10495	0.353093	no
C7_00550C_A	C7_00550C_A	C7_00550C_A	GLN4	Ca22chr7A_C_albicans_SC5314:88680-91080	37Control	37	OK	52.1127	108.619	1.05957	1.17219	0.0979	0.338774	no
C1_10940C_A	C1_10940C_A	C1_10940C_A	ERP5	Ca22chr1A_C_albicans_SC5314:2415771-2416490	37Control	37	OK	199.501	415.653	1.05898	1.07182	0.1369	0.41276	no
C1_14500C_A	C1_14500C_A	C1_14500C_A	C1_14500C_A	Ca22chr1A_C_albicans_SC5314:3177390-3178053	37Control	37	OK	326.313	679.654	1.05854	1.10806	0.1009	0.344285	no
C5_01080C_A	C5_01080C_A	C5_01080C_A	GDS1	Ca22chr5A_C_albicans_SC5314:229536-231060	37Control	37	OK	70.3041	146.412	1.05835	1.23433	0.0674	0.268616	no
CR_06150C_A	CR_06150C_A	CR_06150C_A	ADE13	Ca22chrRA_C_albicans_SC5314:1318864-1320313	37Control	37	OK	215.953	449.631	1.05802	0.918302	0.18755	0.500284	no
C2_02710C_A	C2_02710C_A	C2_02710C_A	C2_02710C_A	Ca22chr2A_C_albicans_SC5314:540982-541825	37Control	37	OK	115.556	240.539	1.05767	1.28341	0.0612	0.25362	no
C2_04860W_A	C2_04860W_A	C2_04860W_A	PZF1	Ca22chr2A_C_albicans_SC5314:1015778-1017017	37Control	37	OK	24.0066	49.9256	1.05635	1.31882	0.0671	0.268044	no
C3_07540C_A	C3_07540C_A	C3_07540C_A	C3_07540C_A	Ca22chr3A_C_albicans_SC5314:1715988-1716855	37Control	37	OK	44.8482	93.1745	1.05488	1.30064	0.0724	0.281108	no
CR_01280C_A	CR_01280C_A	CR_01280C_A	CR_01280C_A	Ca22chrRA_C_albicans_SC5314:305766-306345	37Control	37	OK	62.3009	129.378	1.05427	1.325	0.0654	0.263658	no
C4_06370C_A	C4_06370C_A	C4_06370C_A	C4_06370C_A	Ca22chr4A_C_albicans_SC5314:1413403-1415089	37Control	37	OK	9.16235	19.0233	1.05397	1.24096	0.08395	0.308406	no
C1_02240W_A	C1_02240W_A	C1_02240W_A	C1_02240W_A	Ca22chr1A_C_albicans_SC5314:469115-471743	37Control	37	OK	23.9918	49.8086	1.05385	1.33563	0.04985	0.224892	no
C5_03250W_A	C5_03250W_A	C5_03250W_A	RMS1	Ca22chr5A_C_albicans_SC5314:734681-736340	37Control	37	OK	23.0034	47.7408	1.05338	1.34795	0.0527	0.232569	no
C1_04280C_A	C1_04280C_A	C1_04280C_A	C1_04280C_A	Ca22chr1A_C_albicans_SC5314:884549-885734	37Control	37	OK	7.05036	14.6282	1.05298	1.13786	0.1047	0.352588	no
CR_04090C_A	CR_04090C_A	CR_04090C_A	ADE17	Ca22chrRA_C_albicans_SC5314:917824-919603	37Control	37	OK	303.388	628.783	1.0514	0.866576	0.22735	0.557715	no
C4_00220C_A	C4_00220C_A	C4_00220C_A	SUB2	Ca22chr4A_C_albicans_SC5314:33382-34763	37Control	37	OK	198.616	411.439	1.0507	1.00927	0.1168	0.376829	no
CR_07720C_A	CR_07720C_A	CR_07720C_A	CDC45	Ca22chrRA_C_albicans_SC5314:1673906-1675646	37Control	37	OK	12.0947	25.0283	1.04919	1.32906	0.04725	0.216974	no
C6_03860C_A	C6_03860C_A	C6_03860C_A	PGA61	Ca22chr6A_C_albicans_SC5314:841827-842499	37Control	37	OK	5.45839	11.2912	1.04865	0.985799	0.14535	0.428028	no
C6_02080W_A	C6_02080W_A	C6_02080W_A	C6_02080W_A	Ca22chr6A_C_albicans_SC5314:424969-425898	37Control	37	OK	66.9114	138.307	1.04755	0.105853	0.61725	0.886323	no
C7_00760C_A	C7_00760C_A	C7_00760C_A	C7_00760C_A	Ca22chr7A_C_albicans_SC5314:144059-144569	37Control	37	OK	2.77831	5.74195	1.04733	0.759566	0.2994	0.646475	no
C4_05190C_A	C4_05190C_A	C4_05190C_A	EDC3	Ca22chr4A_C_albicans_SC5314:1125093-1126632	37Control	37	OK	22.2554	45.9924	1.04724	1.32846	0.06085	0.252781	no
C4_04780W_A	C4_04780W_A	C4_04780W_A	PMT6	Ca22chr4A_C_albicans_SC5314:1022583-1025082	37Control	37	OK	13.9146	28.7202	1.04547	1.28552	0.06775	0.269384	no
CR_00580W_A	CR_00580W_A	CR_00580W_A	YRB1	Ca22chrRA_C_albicans_SC5314:136148-136787	37Control	37	OK	452.283	933.522	1.04546	1.04146	0.1393	0.417191	no
C7_01380W_A	C7_01380W_A	C7_01380W_A	C7_01380W_A	Ca22chr7A_C_albicans_SC5314:281374-282502	37Control	37	OK	4.09377	8.44803	1.04519	0.993388	0.16525	0.464065	no
C2_04790C_A	C2_04790C_A	C2_04790C_A	C2_04790C_A	Ca22chr2A_C_albicans_SC5314:1004404-1005511	37Control	37	OK	63.3593	130.747	1.04515	1.31622	0.05085	0.227334	no
C5_00460C_A	C5_00460C_A	C5_00460C_A	FET33	Ca22chr5A_C_albicans_SC5314:82116-83979	37Control	37	OK	17.8333	36.7861	1.04459	1.32089	0.05745	0.243819	no
C1_11430W_A	C1_11430W_A	C1_11430W_A	C1_11430W_A	Ca22chr1A_C_albicans_SC5314:2506059-2508006	37Control	37	OK	9.93757	20.4959	1.04437	1.28859	0.06565	0.264157	no
C7_03040W_A	C7_03040W_A	C7_03040W_A	C7_03040W_A	Ca22chr7A_C_albicans_SC5314:658744-659356	37Control	37	OK	20.3836	42.014	1.04346	1.14645	0.1021	0.346996	no
CR_05290W_A	CR_05290W_A	CR_05290W_A	MNT3	Ca22chrRA_C_albicans_SC5314:1138118-1139255	37Control	37	OK	22.196	45.6644	1.04077	1.3004	0.06775	0.269384	no
C1_06960W_A	C1_06960W_A	C1_06960W_A	SUI2	Ca22chr1A_C_albicans_SC5314:1484761-1485664	37Control	37	OK	291.197	598.858	1.04022	1.01567	0.1479	0.432629	no
C3_07930C_A	C3_07930C_A	C3_07930C_A	C3_07930C_A	Ca22chr3A_C_albicans_SC5314:1781079-1784314	37Control	37	OK	34.2557	70.3991	1.03921	0.288069	0.6916	0.919531	no
C1_07510W_A	C1_07510W_A	C1_07510W_A	C1_07510W_A	Ca22chr1A_C_albicans_SC5314:1625173-1626007	37Control	37	OK	48.0777	98.6906	1.03754	1.35457	0.0431	0.205568	no
C2_07940C_A	C2_07940C_A	C2_07940C_A	ALG7	Ca22chr2A_C_albicans_SC5314:1615385-1616870	37Control	37	OK	26.1945	53.7209	1.03622	1.35375	0.0431	0.205568	no
C2_05470W_A	C2_05470W_A	C2_05470W_A	COQ5	Ca22chr2A_C_albicans_SC5314:1120483-1121404	37Control	37	OK	112.781	231.151	1.03532	1.24026	0.0825	0.305342	no
C1_10930C_A	C1_10930C_A	C1_10930C_A	UBA4	Ca22chr1A_C_albicans_SC5314:2414143-2415460	37Control	37	OK	30.1034	61.6806	1.03489	1.31548	0.05045	0.226352	no
C1_01350C_A	C1_01350C_A	C1_01350C_A	TIF	Ca22chr1A_C_albicans_SC5314:263478-264672	37Control	37	OK	796.774	1631.84	1.03425	0.847518	0.2315	0.563736	no
C4_06270C_A	C4_06270C_A	C4_06270C_A	ERG26	Ca22chr4A_C_albicans_SC5314:1397073-1398126	37Control	37	OK	76.6909	156.999	1.03363	1.06642	0.12775	0.397424	no
C1_07030C_A	C1_07030C_A	C1_07030C_A	RBT4	Ca22chr1A_C_albicans_SC5314:1497904-1498981	37Control	37	OK	58.0256	118.787	1.03362	1.22671	0.06025	0.251398	no
C3_01850W_A	C3_01850W_A	C3_01850W_A	C3_01850W_A	Ca22chr3A_C_albicans_SC5314:408918-409974	37Control	37	OK	93.5114	191.142	1.03143	1.23487	0.08945	0.319573	no
C2_07730W_A	C2_07730W_A	C2_07730W_A	YVC1	Ca22chr2A_C_albicans_SC5314:1577336-1579364	37Control	37	OK	15.3717	31.4157	1.03121	1.22733	0.0794	0.297968	no
CR_01520W_A	CR_01520W_A	CR_01520W_A	PTC2	Ca22chrRA_C_albicans_SC5314:349629-351381	37Control	37	OK	136.451	278.25	1.028	1.0222	0.14905	0.43471	no
C3_05460W_A	C3_05460W_A	C3_05460W_A	C3_05460W_A	Ca22chr3A_C_albicans_SC5314:1226659-1228948	37Control	37	OK	13.3587	27.2373	1.0278	1.25441	0.0701	0.275069	no
CR_01690C_A	CR_01690C_A	CR_01690C_A	CDC60	Ca22chrRA_C_albicans_SC5314:384285-387579	37Control	37	OK	99.9612	203.78	1.02757	0.982087	0.15595	0.447421	no
C1_11020W_A	C1_11020W_A	C1_11020W_A	C1_11020W_A	Ca22chr1A_C_albicans_SC5314:2429969-2432009	37Control	37	OK	10.7093	21.8287	1.02736	1.21219	0.08285	0.306217	no
CR_02850C_A	CR_02850C_A	CR_02850C_A	GZF3	Ca22chrRA_C_albicans_SC5314:647405-649544	37Control	37	OK	69.5938	141.813	1.02696	0.87252	0.22165	0.550409	no
C2_06260W_A	C2_06260W_A	C2_06260W_A	C2_06260W_A	Ca22chr2A_C_albicans_SC5314:1275157-1275673	37Control	37	OK	25.1109	51.1527	1.0265	1.09745	0.1338	0.406668	no
C5_03000C_A	C5_03000C_A	C5_03000C_A	C5_03000C_A	Ca22chr5A_C_albicans_SC5314:661021-664453	37Control	37	OK	4.73179	9.63837	1.0264	1.15554	0.1153	0.373589	no
C7_01520W_A	C7_01520W_A	C7_01520W_A	FLU1	Ca22chr7A_C_albicans_SC5314:320554-322387	37Control	37	OK	19.022	38.7402	1.02616	1.30962	0.0656	0.264125	no
C2_07820C_A	C2_07820C_A	C2_07820C_A	PHO86	Ca22chr2A_C_albicans_SC5314:1593193-1594201	37Control	37	OK	60.9984	124.142	1.02514	1.24424	0.0799	0.299188	no
C4_01920W_A	C4_01920W_A	C4_01920W_A	DPM3	Ca22chr4A_C_albicans_SC5314:374222-374501	37Control	37	OK	400.248	813.993	1.02412	1.27786	0.0507	0.226933	no
C6_00340C_A	C6_00340C_A	C6_00340C_A	C6_00340C_A	Ca22chr6A_C_albicans_SC5314:57602-59954	37Control	37	OK	22.8424	46.4369	1.02356	1.23784	0.07855	0.295957	no
C1_04830W_A	C1_04830W_A	C1_04830W_A	SEC21	Ca22chr1A_C_albicans_SC5314:1004468-1007279	37Control	37	OK	45.9489	93.3668	1.02288	1.11306	0.0925	0.326201	no
C7_01600W_A	C7_01600W_A	C7_01600W_A	C7_01600W_A	Ca22chr7A_C_albicans_SC5314:345793-346918	37Control	37	OK	72.1295	146.527	1.02251	1.25066	0.0728	0.282137	no
C2_00790C_A	C2_00790C_A	C2_00790C_A	C2_00790C_A	Ca22chr2A_C_albicans_SC5314:134594-135632	37Control	37	OK	75.3354	152.991	1.02205	1.23748	0.08035	0.300276	no
C1_12820C_A	C1_12820C_A	C1_12820C_A	C1_12820C_A	Ca22chr1A_C_albicans_SC5314:2791181-2792130	37Control	37	OK	75.3788	153.047	1.02174	1.33338	0.0438	0.207332	no
C3_01020W_A	C3_01020W_A	C3_01020W_A	C3_01020W_A	Ca22chr3A_C_albicans_SC5314:209717-211511	37Control	37	OK	15.0423	30.5194	1.0207	1.3097	0.0652	0.263246	no
CR_09910W_A	CR_09910W_A	CR_09910W_A	GNP3	Ca22chrRA_C_albicans_SC5314:2118629-2120327	37Control	37	OK	17.1417	34.7158	1.01809	1.20169	0.0959	0.334422	no
C1_00990C_A	C1_00990C_A	C1_00990C_A	NMA111	Ca22chr1A_C_albicans_SC5314:199315-202249	37Control	37	OK	29.2862	59.2928	1.01764	1.21577	0.09265	0.326546	no
C3_07480W_A	C3_07480W_A	C3_07480W_A	C3_07480W_A	Ca22chr3A_C_albicans_SC5314:1709296-1710637	37Control	37	OK	36.4481	73.7726	1.01724	1.29747	0.06395	0.260207	no
CR_04920W_A	CR_04920W_A	CR_04920W_A	CR_04920W_A	Ca22chrRA_C_albicans_SC5314:1064624-1065713	37Control	37	OK	39.0779	79.095	1.01723	1.29697	0.061	0.253125	no
C4_01800W_A	C4_01800W_A	C4_01800W_A	C4_01800W_A	Ca22chr4A_C_albicans_SC5314:356482-357208	37Control	37	OK	9.6828	19.5878	1.01646	0.942788	0.18995	0.503974	no
C5_03010W_A	C5_03010W_A	C5_03010W_A	C5_03010W_A	Ca22chr5A_C_albicans_SC5314:664893-666915	37Control	37	OK	9.66744	19.5474	1.01577	1.24398	0.0701	0.275069	no
CR_05510W_A	CR_05510W_A	CR_05510W_A	STE13	Ca22chrRA_C_albicans_SC5314:1171819-1174612	37Control	37	OK	8.5989	17.3726	1.01459	1.27669	0.0784	0.295628	no
C2_01420C_A	C2_01420C_A	C2_01420C_A	C2_01420C_A	Ca22chr2A_C_albicans_SC5314:254546-256163	37Control	37	OK	7.72426	15.5992	1.014	1.19327	0.0868	0.314218	no
C1_01640W_A	C1_01640W_A	C1_01640W_A	RPS42	Ca22chr1A_C_albicans_SC5314:332720-334077	37Control	37	OK	276.37	557.901	1.01341	1.00825	0.14895	0.434699	no
C3_02080W_A	C3_02080W_A	C3_02080W_A	C3_02080W_A	Ca22chr3A_C_albicans_SC5314:451390-453976	37Control	37	OK	8.39507	16.9456	1.0133	1.29242	0.06255	0.256897	no
C1_14410W_A	C1_14410W_A	C1_14410W_A	C1_14410W_A	Ca22chr1A_C_albicans_SC5314:3167603-3169746	37Control	37	OK	1126.94	2274.63	1.01322	0.989964	0.15315	0.442556	no
C2_06330C_A	C2_06330C_A	C2_06330C_A	AVT1	Ca22chr2A_C_albicans_SC5314:1288827-1290435	37Control	37	OK	19.4837	39.3252	1.01319	1.28806	0.0651	0.262955	no
CR_08590W_A	CR_08590W_A	CR_08590W_A	CR_08590W_A	Ca22chrRA_C_albicans_SC5314:1851758-1854059	37Control	37	OK	17.5407	35.3859	1.01247	1.2999	0.06085	0.252781	no
C5_01690C_A	C5_01690C_A	C5_01690C_A	CCT7	Ca22chr5A_C_albicans_SC5314:382475-384125	37Control	37	OK	90.5868	182.643	1.01166	1.13592	0.1063	0.355854	no
C1_00140W_A	C1_00140W_A	C1_00140W_A	KEL1	Ca22chr1A_C_albicans_SC5314:22269-25326	37Control	37	OK	14.9505	30.1399	1.01148	1.29838	0.0637	0.259751	no
C6_00690W_A	C6_00690W_A	C6_00690W_A	C6_00690W_A	Ca22chr6A_C_albicans_SC5314:119447-120974	37Control	37	OK	17.8116	35.9074	1.01146	1.29864	0.06965	0.274103	no
CR_00900W_A	CR_00900W_A	CR_00900W_A	TRM1	Ca22chrRA_C_albicans_SC5314:202215-203886	37Control	37	OK	19.2623	38.8118	1.01072	1.29204	0.06815	0.27046	no
CR_03850W_A	CR_03850W_A	CR_03850W_A	HGT3	Ca22chrRA_C_albicans_SC5314:860661-862605	37Control	37	OK	3.21971	6.48135	1.00936	1.01244	0.15315	0.442556	no
C6_04340W_A	C6_04340W_A	C6_04340W_A	C6_04340W_A	Ca22chr6A_C_albicans_SC5314:957363-958923	37Control	37	OK	14.2477	28.672	1.00891	1.25556	0.07535	0.288752	no
C7_03200C_A	C7_03200C_A	C7_03200C_A	C7_03200C_A	Ca22chr7A_C_albicans_SC5314:693434-694121	37Control	37	OK	46.051	92.634	1.00831	1.26843	0.0771	0.292248	no
C2_00630C_A	C2_00630C_A	C2_00630C_A	C2_00630C_A	Ca22chr2A_C_albicans_SC5314:99681-100710	37Control	37	OK	14.5313	29.2256	1.00807	1.14462	0.1124	0.36844	no
C3_05170W_A	C3_05170W_A	C3_05170W_A	WOR2	Ca22chr3A_C_albicans_SC5314:1118724-1120065	37Control	37	OK	19.2002	38.5866	1.00697	1.28295	0.06285	0.257848	no
C4_04330C_A	C4_04330C_A	C4_04330C_A	C4_04330C_A	Ca22chr4A_C_albicans_SC5314:925693-926599	37Control	37	OK	114.558	230.061	1.00593	1.10727	0.10975	0.362694	no
C5_00940C_A	C5_00940C_A	C5_00940C_A	HAP5	Ca22chr5A_C_albicans_SC5314:214535-215582	37Control	37	OK	30.8941	61.9802	1.00448	1.28211	0.06225	0.256317	no
C2_08810C_A	C2_08810C_A	C2_08810C_A	IPP1	Ca22chr2A_C_albicans_SC5314:1790254-1791121	37Control	37	OK	820.812	1645.01	1.00297	0.782028	0.22675	0.556896	no
C1_07820W_A	C1_07820W_A	C1_07820W_A	C1_07820W_A	Ca22chr1A_C_albicans_SC5314:1705109-1706270	37Control	37	OK	14.09	28.2271	1.00241	1.19543	0.0965	0.335285	no
C4_03700W_A	C4_03700W_A	C4_03700W_A	C4_03700W_A	Ca22chr4A_C_albicans_SC5314:788603-790349	37Control	37	OK	36.2885	72.6893	1.00223	1.27983	0.0624	0.256449	no
C7_03190C_A	C7_03190C_A	C7_03190C_A	C7_03190C_A	Ca22chr7A_C_albicans_SC5314:691393-692593	37Control	37	OK	5.42462	10.866	1.00222	0.0934957	0.5512	0.853701	no
C5_00170W_A	C5_00170W_A	C5_00170W_A	C5_00170W_A	Ca22chr5A_C_albicans_SC5314:19010-20093	37Control	37	OK	36.1051	72.2841	1.00147	1.26054	0.08025	0.300022	no
CR_08580C_A	CR_08580C_A	CR_08580C_A	CR_08580C_A	Ca22chrRA_C_albicans_SC5314:1847066-1851599	37Control	37	OK	22.6351	45.2814	1.00036	0.574732	0.37115	0.721128	no
C4_03150W_A	C4_03150W_A	C4_03150W_A	C4_03150W_A	Ca22chr4A_C_albicans_SC5314:660575-663860	37Control	37	OK	10.7136	21.4148	0.999159	1.30569	0.0528	0.232847	no
C4_00880W_A	C4_00880W_A	C4_00880W_A	C4_00880W_A	Ca22chr4A_C_albicans_SC5314:157301-158897	37Control	37	OK	35.3555	70.6669	0.9991	1.28306	0.0702	0.275233	no
C2_05220C_A	C2_05220C_A	C2_05220C_A	C2_05220C_A	Ca22chr2A_C_albicans_SC5314:1072540-1075639	37Control	37	OK	19.4547	38.867	0.998426	1.27619	0.0628	0.257755	no
C1_11400C_A	C1_11400C_A	C1_11400C_A	GIN4	Ca22chr1A_C_albicans_SC5314:2497782-2501832	37Control	37	OK	10.7125	21.3901	0.99764	1.26605	0.07105	0.27741	no
C1_03760C_A	C1_03760C_A	C1_03760C_A	STR2	Ca22chr1A_C_albicans_SC5314:785086-786874	37Control	37	OK	36.3076	72.4365	0.996445	1.25467	0.0623	0.256317	no
C1_08010W_A	C1_08010W_A	C1_08010W_A	DPM1	Ca22chr1A_C_albicans_SC5314:1750205-1750925	37Control	37	OK	191.793	382.548	0.996087	1.03195	0.14015	0.418473	no
C4_05260W_A	C4_05260W_A	C4_05260W_A	C4_05260W_A	Ca22chr4A_C_albicans_SC5314:1143092-1144082	37Control	37	OK	28.0194	55.8618	0.995435	1.27774	0.06895	0.27243	no
C5_00150C_A	C5_00150C_A	C5_00150C_A	C5_00150C_A	Ca22chr5A_C_albicans_SC5314:16397-18029	37Control	37	OK	89.3137	178.036	0.995215	1.11303	0.1151	0.373391	no
CR_05570C_A	CR_05570C_A	CR_05570C_A	RNR3	Ca22chrRA_C_albicans_SC5314:1187176-1189627	37Control	37	OK	11.2719	22.4557	0.994354	0.998788	0.1633	0.460856	no
CR_06760C_A	CR_06760C_A	CR_06760C_A	LSC2	Ca22chrRA_C_albicans_SC5314:1451388-1453027	37Control	37	OK	255.279	508.418	0.993939	0.868306	0.23125	0.563466	no
C1_00550W_A	C1_00550W_A	C1_00550W_A	CIS2	Ca22chr1A_C_albicans_SC5314:87899-89810	37Control	37	OK	13.7448	27.3627	0.993324	1.23036	0.08795	0.316617	no
CR_09770C_A	CR_09770C_A	CR_09770C_A	PMT5	Ca22chrRA_C_albicans_SC5314:2073882-2076060	37Control	37	OK	14.3357	28.5388	0.993312	1.25985	0.0724	0.281108	no
C3_01690W_A	C3_01690W_A	C3_01690W_A	C3_01690W_A	Ca22chr3A_C_albicans_SC5314:365247-366450	37Control	37	OK	34.2982	68.2686	0.99309	1.26727	0.06685	0.267386	no
C6_03570W_A	C6_03570W_A	C6_03570W_A	C6_03570W_A	Ca22chr6A_C_albicans_SC5314:759010-759733	37Control	37	OK	0.174741	0.347272	0.990848	0.510591	0.51415	0.833065	no
C3_07900C_A	C3_07900C_A	C3_07900C_A	C3_07900C_A	Ca22chr3A_C_albicans_SC5314:1781079-1784314	37Control	37	OK	14.3294	28.468	0.990363	0.479709	0.6663	0.909219	no
C1_02850W_A	C1_02850W_A	C1_02850W_A	C1_02850W_A	Ca22chr1A_C_albicans_SC5314:600682-602722	37Control	37	OK	33.9201	67.3803	0.990187	1.24629	0.06195	0.255547	no
C4_02120W_A	C4_02120W_A	C4_02120W_A	ERV29	Ca22chr4A_C_albicans_SC5314:421019-421946	37Control	37	OK	78.7989	156.515	0.990057	1.19551	0.0782	0.295407	no
C1_10210C_A	C1_10210C_A	C1_10210C_A	CLA4	Ca22chr1A_C_albicans_SC5314:2249404-2252335	37Control	37	OK	12.5368	24.8755	0.988551	1.28653	0.0537	0.235438	no
C5_01310W_A	C5_01310W_A	C5_01310W_A	C5_01310W_A	Ca22chr5A_C_albicans_SC5314:293742-294381	37Control	37	OK	23.4441	46.4843	0.987519	1.15572	0.09145	0.323832	no
C4_01370W_A	C4_01370W_A	C4_01370W_A	ILV6	Ca22chr4A_C_albicans_SC5314:280486-281395	37Control	37	OK	152.528	302.417	0.987464	1.11411	0.1186	0.379903	no
C3_07800C_A	C3_07800C_A	C3_07800C_A	C3_07800C_A	Ca22chr3A_C_albicans_SC5314:1773214-1773838	37Control	37	OK	103.469	205.059	0.986845	1.27066	0.06835	0.271083	no
C2_09870W_A	C2_09870W_A	C2_09870W_A	C2_09870W_A	Ca22chr2A_C_albicans_SC5314:2018703-2019741	37Control	37	OK	30.725	60.8322	0.985425	1.22364	0.0913	0.323544	no
CR_02440W_A	CR_02440W_A	CR_02440W_A	CR_02440W_A	Ca22chrRA_C_albicans_SC5314:542622-542955	37Control	37	OK	22.5051	44.5302	0.984533	0.868221	0.2402	0.573842	no
C7_00240W_A	C7_00240W_A	C7_00240W_A	C7_00240W_A	Ca22chr7A_C_albicans_SC5314:33809-34454	37Control	37	OK	71.1973	140.855	0.984316	1.25739	0.0718	0.279585	no
C6_01000C_A	C6_01000C_A	C6_01000C_A	C6_01000C_A	Ca22chr6A_C_albicans_SC5314:197029-198280	37Control	37	OK	24.9576	49.3741	0.984274	1.22509	0.0912	0.323433	no
C1_00560W_A	C1_00560W_A	C1_00560W_A	CNS1	Ca22chr1A_C_albicans_SC5314:90098-91271	37Control	37	OK	41.3707	81.8437	0.984263	1.25777	0.0739	0.284702	no
C5_03410C_A	C5_03410C_A	C5_03410C_A	C5_03410C_A	Ca22chr5A_C_albicans_SC5314:768109-768631	37Control	37	OK	153.098	302.727	0.983558	1.25545	0.0705	0.27572	no
C4_03750C_A	C4_03750C_A	C4_03750C_A	C4_03750C_A	Ca22chr4A_C_albicans_SC5314:796577-797762	37Control	37	OK	25.8604	51.0761	0.981905	1.23313	0.08835	0.317266	no
C5_00950C_A	C5_00950C_A	C5_00950C_A	C5_00950C_A	Ca22chr5A_C_albicans_SC5314:215855-217277	37Control	37	OK	51.2916	101.2	0.980411	1.24145	0.0658	0.264647	no
C3_05300C_A	C3_05300C_A	C3_05300C_A	C3_05300C_A	Ca22chr3A_C_albicans_SC5314:1168300-1170169	37Control	37	OK	12.9449	25.5369	0.980205	1.25745	0.07385	0.284626	no
C1_07880C_A	C1_07880C_A	C1_07880C_A	GCS1	Ca22chr1A_C_albicans_SC5314:1714643-1716962	37Control	37	OK	52.2726	102.934	0.977592	1.10407	0.12235	0.387891	no
C2_04160W_A	C2_04160W_A	C2_04160W_A	C2_04160W_A	Ca22chr2A_C_albicans_SC5314:875524-876382	37Control	37	OK	57.6785	113.495	0.976527	1.27572	0.05755	0.243969	no
C4_04830W_A	C4_04830W_A	C4_04830W_A	DCR1	Ca22chr4A_C_albicans_SC5314:1037421-1039257	37Control	37	OK	22.9911	45.2126	0.975649	1.2414	0.07555	0.289224	no
C4_06710W_A	C4_06710W_A	C4_06710W_A	C4_06710W_A	Ca22chr4A_C_albicans_SC5314:1495683-1496802	37Control	37	OK	36.711	72.192	0.975626	1.15124	0.0994	0.341393	no
C5_04030W_A	C5_04030W_A	C5_04030W_A	C5_04030W_A	Ca22chr5A_C_albicans_SC5314:891518-892661	37Control	37	OK	121.612	239.019	0.974837	0.818192	0.2067	0.530103	no
C2_00140W_A	C2_00140W_A	C2_00140W_A	NDT80	Ca22chr2A_C_albicans_SC5314:19682-21197	37Control	37	OK	53.1948	104.548	0.974806	1.15609	0.09815	0.339141	no
C1_12760W_A	C1_12760W_A	C1_12760W_A	C1_12760W_A	Ca22chr1A_C_albicans_SC5314:2781192-2782158	37Control	37	OK	51.9684	102.115	0.974495	1.21895	0.06665	0.266983	no
C1_12630C_A	C1_12630C_A	C1_12630C_A	C1_12630C_A	Ca22chr1A_C_albicans_SC5314:2756956-2757631	37Control	37	OK	37.2342	73.154	0.97431	1.19804	0.0878	0.316198	no
C2_02030W_A	C2_02030W_A	C2_02030W_A	ARO3	Ca22chr2A_C_albicans_SC5314:392596-393825	37Control	37	OK	208.927	410.326	0.973772	0.97385	0.1586	0.451789	no
CR_05210W_A	CR_05210W_A	CR_05210W_A	CR_05210W_A	Ca22chrRA_C_albicans_SC5314:1125687-1126713	37Control	37	OK	11.8473	23.2557	0.973025	1.03982	0.1333	0.406066	no
C2_09020W_A	C2_09020W_A	C2_09020W_A	CDC47	Ca22chr2A_C_albicans_SC5314:1844928-1847274	37Control	37	OK	41.7569	81.9303	0.972382	1.1567	0.10455	0.352335	no
C7_04130C_A	C7_04130C_A	C7_04130C_A	SUI3	Ca22chr7A_C_albicans_SC5314:892095-892941	37Control	37	OK	326.276	639.709	0.971324	1.01588	0.1193	0.381432	no
C7_03420C_A	C7_03420C_A	C7_03420C_A	SNG3	Ca22chr7A_C_albicans_SC5314:753810-755640	37Control	37	OK	14.0502	27.5473	0.971319	1.19006	0.0812	0.302253	no
C1_00680W_A	C1_00680W_A	C1_00680W_A	ASM3	Ca22chr1A_C_albicans_SC5314:117318-119442	37Control	37	OK	10.3415	20.2754	0.97129	1.23281	0.0736	0.284127	no
C3_01990W_A	C3_01990W_A	C3_01990W_A	RNA1	Ca22chr3A_C_albicans_SC5314:436118-437363	37Control	37	OK	147.944	289.884	0.970427	0.980064	0.1756	0.480798	no
C5_02820C_A	C5_02820C_A	C5_02820C_A	C5_02820C_A	Ca22chr5A_C_albicans_SC5314:629719-630532	37Control	37	OK	61.6386	120.755	0.970173	1.2448	0.07835	0.295628	no
C2_02120W_A	C2_02120W_A	C2_02120W_A	C2_02120W_A	Ca22chr2A_C_albicans_SC5314:416495-417551	37Control	37	OK	74.3145	145.585	0.970143	1.22891	0.06955	0.273939	no
C4_07240W_A	C4_07240W_A	C4_07240W_A	C4_07240W_A	Ca22chr4A_C_albicans_SC5314:1596551-1596950	37Control	37	OK	170.232	333.464	0.970029	1.2612	0.05585	0.239949	no
CR_08370W_A	CR_08370W_A	CR_08370W_A	GSH2	Ca22chrRA_C_albicans_SC5314:1810202-1811660	37Control	37	OK	46.8848	91.7883	0.969189	1.23267	0.0695	0.273856	no
C2_06760C_A	C2_06760C_A	C2_06760C_A	C2_06760C_A	Ca22chr2A_C_albicans_SC5314:1387410-1388661	37Control	37	OK	7.65269	14.9782	0.968828	1.02704	0.138	0.414815	no
C3_01880W_A	C3_01880W_A	C3_01880W_A	ALG8	Ca22chr3A_C_albicans_SC5314:412493-414257	37Control	37	OK	12.3879	24.2341	0.968103	1.22764	0.07195	0.280053	no
C2_04200W_A	C2_04200W_A	C2_04200W_A	TBF1	Ca22chr2A_C_albicans_SC5314:880755-883416	37Control	37	OK	13.4802	26.368	0.967952	1.17989	0.08735	0.315542	no
C6_03960W_A	C6_03960W_A	C6_03960W_A	C6_03960W_A	Ca22chr6A_C_albicans_SC5314:857388-859491	37Control	37	OK	52.9936	103.574	0.966774	0.99583	0.1484	0.433822	no
C5_04350C_A	C5_04350C_A	C5_04350C_A	C5_04350C_A	Ca22chr5A_C_albicans_SC5314:962393-963245	37Control	37	OK	70.8339	138.44	0.966744	1.24327	0.0784	0.295628	no
CR_03750C_A	CR_03750C_A	CR_03750C_A	PRP42	Ca22chrRA_C_albicans_SC5314:836855-838037	37Control	37	OK	18.4926	36.1397	0.966637	1.21899	0.06965	0.274103	no
C4_05460C_A	C4_05460C_A	C4_05460C_A	OFD1	Ca22chr4A_C_albicans_SC5314:1190490-1192344	37Control	37	OK	44.1073	86.1738	0.966233	1.16677	0.09435	0.33062	no
C4_01730C_A	C4_01730C_A	C4_01730C_A	C4_01730C_A	Ca22chr4A_C_albicans_SC5314:342882-345000	37Control	37	OK	19.4473	37.9856	0.965885	1.23946	0.07885	0.296672	no
CR_08330W_A	CR_08330W_A	CR_08330W_A	CR_08330W_A	Ca22chrRA_C_albicans_SC5314:1804011-1804677	37Control	37	OK	58.8189	114.809	0.964879	1.23281	0.0821	0.3044	no
C1_05270C_A	C1_05270C_A	C1_05270C_A	C1_05270C_A	Ca22chr1A_C_albicans_SC5314:1108145-1108865	37Control	37	OK	142.686	278.321	0.963907	1.16114	0.09385	0.329297	no
C1_02020W_A	C1_02020W_A	C1_02020W_A	C1_02020W_A	Ca22chr1A_C_albicans_SC5314:416451-417075	37Control	37	OK	28.4574	55.4924	0.963488	1.14989	0.10815	0.359514	no
C5_01230C_A	C5_01230C_A	C5_01230C_A	C5_01230C_A	Ca22chr5A_C_albicans_SC5314:274464-275364	37Control	37	OK	159.175	310.191	0.962544	1.00009	0.16355	0.461078	no
C1_13760W_A	C1_13760W_A	C1_13760W_A	AGM1	Ca22chr1A_C_albicans_SC5314:3020865-3022500	37Control	37	OK	29.1815	56.8536	0.962199	1.17146	0.08755	0.315841	no
C7_00830C_A	C7_00830C_A	C7_00830C_A	C7_00830C_A	Ca22chr7A_C_albicans_SC5314:157501-159808	37Control	37	OK	15.0297	29.2721	0.961707	1.21959	0.0843	0.30927	no
C2_04520C_A	C2_04520C_A	C2_04520C_A	C2_04520C_A	Ca22chr2A_C_albicans_SC5314:948351-949059	37Control	37	OK	17.1835	33.4322	0.960219	1.01557	0.1599	0.454393	no
C1_08710W_A	C1_08710W_A	C1_08710W_A	C1_08710W_A	Ca22chr1A_C_albicans_SC5314:1901479-1902264	37Control	37	OK	52.5565	102.232	0.9599	1.18621	0.099	0.340703	no
C1_09290C_A	C1_09290C_A	C1_09290C_A	ARG5%2C6	Ca22chr1A_C_albicans_SC5314:2041211-2043785	37Control	37	OK	25.3448	49.2969	0.959809	1.21128	0.0734	0.283646	no
C6_02880W_A	C6_02880W_A	C6_02880W_A	C6_02880W_A	Ca22chr6A_C_albicans_SC5314:596394-597093	37Control	37	OK	49.2565	95.7713	0.959281	1.13306	0.1171	0.377409	no
C5_02970W_A	C5_02970W_A	C5_02970W_A	DAP2	Ca22chr5A_C_albicans_SC5314:656965-659482	37Control	37	OK	23.2499	45.2004	0.959112	1.22285	0.0739	0.284702	no
C1_09570W_A	C1_09570W_A	C1_09570W_A	C1_09570W_A	Ca22chr1A_C_albicans_SC5314:2106954-2108577	37Control	37	OK	40.5142	78.7607	0.959048	1.20835	0.0719	0.279917	no
C4_06770W_A	C4_06770W_A	C4_06770W_A	C4_06770W_A	Ca22chr4A_C_albicans_SC5314:1509592-1511473	37Control	37	OK	20.466	39.7439	0.957501	1.21879	0.0798	0.298873	no
CR_07600W_A	CR_07600W_A	CR_07600W_A	CR_07600W_A	Ca22chrRA_C_albicans_SC5314:1650949-1654243	37Control	37	OK	15.342	29.787	0.957198	1.2251	0.08325	0.306972	no
C1_05210C_A	C1_05210C_A	C1_05210C_A	C1_05210C_A	Ca22chr1A_C_albicans_SC5314:1101240-1102398	37Control	37	OK	78.4601	152.265	0.956555	1.1637	0.08715	0.315122	no
C4_02100C_A	C4_02100C_A	C4_02100C_A	GPI14	Ca22chr4A_C_albicans_SC5314:418035-419232	37Control	37	OK	13.242	25.6974	0.956504	1.09145	0.1281	0.397424	no
CR_04060C_A	CR_04060C_A	CR_04060C_A	DAP1	Ca22chrRA_C_albicans_SC5314:913388-913856	37Control	37	OK	152.126	295.097	0.955927	1.09954	0.11155	0.366546	no
C5_03290C_A	C5_03290C_A	C5_03290C_A	C5_03290C_A	Ca22chr5A_C_albicans_SC5314:744289-744577	37Control	37	OK	208.075	403.542	0.955619	1.20675	0.07535	0.288752	no
C3_02460C_A	C3_02460C_A	C3_02460C_A	PHA2	Ca22chr3A_C_albicans_SC5314:537127-538135	37Control	37	OK	29.8781	57.9365	0.955385	1.21098	0.077	0.292163	no
C2_04460W_A	C2_04460W_A	C2_04460W_A	LYS22	Ca22chr2A_C_albicans_SC5314:931946-933200	37Control	37	OK	140.63	272.642	0.9551	1.04359	0.15105	0.43898	no
C2_01090C_A	C2_01090C_A	C2_01090C_A	ERG28	Ca22chr2A_C_albicans_SC5314:176491-176908	37Control	37	OK	124.839	241.603	0.952574	1.11229	0.10195	0.346674	no
C7_00330C_A	C7_00330C_A	C7_00330C_A	C7_00330C_A	Ca22chr7A_C_albicans_SC5314:51706-52855	37Control	37	OK	42.3929	82.021	0.952171	1.22221	0.08335	0.307221	no
C2_05020W_A	C2_05020W_A	C2_05020W_A	C2_05020W_A	Ca22chr2A_C_albicans_SC5314:1042889-1043339	37Control	37	OK	128.074	247.708	0.951668	1.24334	0.0608	0.252781	no
C2_09610W_A	C2_09610W_A	C2_09610W_A	C2_09610W_A	Ca22chr2A_C_albicans_SC5314:1967506-1968607	37Control	37	OK	16.2432	31.4157	0.951653	1.11525	0.1141	0.371491	no
C2_08280W_A	C2_08280W_A	C2_08280W_A	EAF3	Ca22chr2A_C_albicans_SC5314:1673266-1674376	37Control	37	OK	21.0563	40.6501	0.949009	1.1803	0.09725	0.337268	no
C1_10750C_A	C1_10750C_A	C1_10750C_A	C1_10750C_A	Ca22chr1A_C_albicans_SC5314:2386239-2386703	37Control	37	OK	146.686	283.037	0.948264	1.18307	0.0984	0.339568	no
C2_02200W_A	C2_02200W_A	C2_02200W_A	C2_02200W_A	Ca22chr2A_C_albicans_SC5314:433117-434554	37Control	37	OK	30.0317	57.9178	0.947522	1.2317	0.06255	0.256897	no
C6_03320W_A	C6_03320W_A	C6_03320W_A	C6_03320W_A	Ca22chr6A_C_albicans_SC5314:696247-699883	37Control	37	OK	103.754	200.092	0.947497	0.742983	0.3402	0.68959	no
C3_06830C_A	C3_06830C_A	C3_06830C_A	C3_06830C_A	Ca22chr3A_C_albicans_SC5314:1556452-1560565	37Control	37	OK	9.81167	18.9177	0.947165	1.23521	0.06455	0.261518	no
CR_09270C_A	CR_09270C_A	CR_09270C_A	CBP1	Ca22chrRA_C_albicans_SC5314:1968718-1970188	37Control	37	OK	111.362	214.658	0.946785	0.957884	0.1747	0.479661	no
C6_02960W_A	C6_02960W_A	C6_02960W_A	C6_02960W_A	Ca22chr6A_C_albicans_SC5314:610395-611592	37Control	37	OK	17.9078	34.5167	0.946708	1.19085	0.07495	0.287512	no
CR_00670C_A	CR_00670C_A	CR_00670C_A	CR_00670C_A	Ca22chrRA_C_albicans_SC5314:165831-167064	37Control	37	OK	24.869	47.8803	0.945086	1.18315	0.10375	0.350706	no
C2_04690C_A	C2_04690C_A	C2_04690C_A	TPO5	Ca22chr2A_C_albicans_SC5314:982317-984330	37Control	37	OK	8.10141	15.5974	0.945057	1.10602	0.12265	0.388385	no
C2_01580W_A	C2_01580W_A	C2_01580W_A	REX2	Ca22chr2A_C_albicans_SC5314:283126-283840	37Control	37	OK	71.9174	138.418	0.944622	1.22544	0.06425	0.260696	no
C1_02290C_A	C1_02290C_A	C1_02290C_A	C1_02290C_A	Ca22chr1A_C_albicans_SC5314:482378-483590	37Control	37	OK	35.6363	68.5764	0.944364	1.1993	0.0848	0.31014	no
C1_14080W_A	C1_14080W_A	C1_14080W_A	C1_14080W_A	Ca22chr1A_C_albicans_SC5314:3099206-3104663	37Control	37	OK	22.5387	43.3687	0.944253	1.04281	0.13695	0.412779	no
C1_11860W_A	C1_11860W_A	C1_11860W_A	C1_11860W_A	Ca22chr1A_C_albicans_SC5314:2595220-2598883	37Control	37	OK	43.0234	82.7475	0.943593	0.946631	0.189	0.502302	no
C3_04770C_A	C3_04770C_A	C3_04770C_A	ZCF32	Ca22chr3A_C_albicans_SC5314:1015232-1017383	37Control	37	OK	6.82244	13.1192	0.943325	1.06365	0.14335	0.424461	no
C7_02280W_A	C7_02280W_A	C7_02280W_A	C7_02280W_A	Ca22chr7A_C_albicans_SC5314:495606-496065	37Control	37	OK	4.19896	8.07082	0.942684	0.660545	0.36715	0.717129	no
C5_05250C_A	C5_05250C_A	C5_05250C_A	C5_05250C_A	Ca22chr5A_C_albicans_SC5314:1147625-1148381	37Control	37	OK	175.276	336.724	0.941939	1.12722	0.1088	0.36072	no
C1_00170W_A	C1_00170W_A	C1_00170W_A	LEU4	Ca22chr1A_C_albicans_SC5314:29803-31543	37Control	37	OK	17.0222	32.6644	0.940307	1.17384	0.0993	0.341174	no
C4_03340C_A	C4_03340C_A	C4_03340C_A	C4_03340C_A	Ca22chr4A_C_albicans_SC5314:701060-702284	37Control	37	OK	7.74181	14.8487	0.939598	0.933485	0.1691	0.469833	no
C3_00390W_A	C3_00390W_A	C3_00390W_A	C3_00390W_A	Ca22chr3A_C_albicans_SC5314:55650-56463	37Control	37	OK	12.4994	23.9553	0.93849	1.002	0.16535	0.464207	no
C2_07110C_A	C2_07110C_A	C2_07110C_A	C2_07110C_A	Ca22chr2A_C_albicans_SC5314:1449219-1451712	37Control	37	OK	12.2311	23.434	0.938049	1.19558	0.09075	0.322323	no
C6_00620W_A	C6_00620W_A	C6_00620W_A	FCA1	Ca22chr6A_C_albicans_SC5314:112251-112774	37Control	37	OK	189.251	362.569	0.937958	1.18995	0.08045	0.300412	no
C2_02880C_A	C2_02880C_A	C2_02880C_A	EBP7	Ca22chr2A_C_albicans_SC5314:575276-576455	37Control	37	OK	19.3226	37.0055	0.937453	1.10577	0.1115	0.366546	no
C1_01190C_A	C1_01190C_A	C1_01190C_A	C1_01190C_A	Ca22chr1A_C_albicans_SC5314:241112-242504	37Control	37	OK	25.5961	48.8707	0.933046	1.21072	0.0644	0.261023	no
C3_02780W_A	C3_02780W_A	C3_02780W_A	SES1	Ca22chr3A_C_albicans_SC5314:601265-602642	37Control	37	OK	191.043	364.72	0.932896	0.928693	0.1724	0.475704	no
C4_01470W_A	C4_01470W_A	C4_01470W_A	C4_01470W_A	Ca22chr4A_C_albicans_SC5314:308172-309812	37Control	37	OK	11.8266	22.5636	0.931959	1.09669	0.1209	0.384654	no
C5_00070W_A	C5_00070W_A	C5_00070W_A	CDC11	Ca22chr5A_C_albicans_SC5314:8945-11086	37Control	37	OK	72.3367	137.976	0.931614	0.593292	0.39705	0.745384	no
C6_03890C_A	C6_03890C_A	C6_03890C_A	SKI8	Ca22chr6A_C_albicans_SC5314:844806-845961	37Control	37	OK	30.8566	58.8462	0.93137	1.18132	0.08635	0.313433	no
C5_01140C_A	C5_01140C_A	C5_01140C_A	C5_01140C_A	Ca22chr5A_C_albicans_SC5314:262790-265052	37Control	37	OK	41.6015	79.3288	0.931209	1.11217	0.12185	0.386762	no
C3_03200C_A	C3_03200C_A	C3_03200C_A	C3_03200C_A	Ca22chr3A_C_albicans_SC5314:678752-678989	37Control	37	OK	220.882	420.839	0.929996	1.08819	0.11485	0.372901	no
C3_05310W_A	C3_05310W_A	C3_05310W_A	USO6	Ca22chr3A_C_albicans_SC5314:1171322-1174715	37Control	37	OK	18.3599	34.9797	0.929957	1.13912	0.10325	0.349392	no
C2_09040W_A	C2_09040W_A	C2_09040W_A	C2_09040W_A	Ca22chr2A_C_albicans_SC5314:1848595-1849177	37Control	37	OK	183.072	348.588	0.929112	1.12272	0.0968	0.336079	no
C5_00080C_A	C5_00080C_A	C5_00080C_A	C5_00080C_A	Ca22chr5A_C_albicans_SC5314:8945-11086	37Control	37	OK	124.796	237.618	0.929074	0.597067	0.36895	0.719078	no
C5_04100W_A	C5_04100W_A	C5_04100W_A	CDS1	Ca22chr5A_C_albicans_SC5314:913805-915161	37Control	37	OK	68.1982	129.824	0.92875	1.09503	0.112	0.367384	no
C5_01240W_A	C5_01240W_A	C5_01240W_A	AUR1	Ca22chr5A_C_albicans_SC5314:276989-278405	37Control	37	OK	65.2045	124.12	0.928689	1.01458	0.13545	0.410095	no
C3_06230W_A	C3_06230W_A	C3_06230W_A	CYM1	Ca22chr3A_C_albicans_SC5314:1421437-1424542	37Control	37	OK	19.231	36.5423	0.926131	1.18437	0.08365	0.307905	no
C5_04710W_A	C5_04710W_A	C5_04710W_A	C5_04710W_A	Ca22chr5A_C_albicans_SC5314:1022681-1024034	37Control	37	OK	16.9569	32.1769	0.924149	1.17324	0.08485	0.31014	no
C5_03970W_A	C5_03970W_A	C5_03970W_A	C5_03970W_A	Ca22chr5A_C_albicans_SC5314:873669-875154	37Control	37	OK	17.0413	32.3262	0.923666	1.08416	0.11345	0.370656	no
C3_01030W_A	C3_01030W_A	C3_01030W_A	ARP9	Ca22chr3A_C_albicans_SC5314:211923-213378	37Control	37	OK	42.2913	80.2097	0.923414	1.17782	0.08695	0.31464	no
C6_02190C_A	C6_02190C_A	C6_02190C_A	C6_02190C_A	Ca22chr6A_C_albicans_SC5314:454197-455418	37Control	37	OK	29.5248	55.9616	0.922511	1.12356	0.10315	0.349304	no
C1_12320C_A	C1_12320C_A	C1_12320C_A	ATP19	Ca22chr1A_C_albicans_SC5314:2687248-2687452	37Control	37	OK	2610.9	4948.34	0.9224	1.09548	0.1258	0.394513	no
CR_09120C_A	CR_09120C_A	CR_09120C_A	TUB1	Ca22chrRA_C_albicans_SC5314:1945290-1946851	37Control	37	OK	178.39	337.954	0.921789	0.887092	0.16665	0.466051	no
C2_10820C_A	C2_10820C_A	C2_10820C_A	C2_10820C_A	Ca22chr2A_C_albicans_SC5314:2217264-2220897	37Control	37	OK	9.80681	18.5783	0.921761	1.2004	0.0699	0.274685	no
C2_01850W_A	C2_01850W_A	C2_01850W_A	RAD23	Ca22chr2A_C_albicans_SC5314:341193-342629	37Control	37	OK	150.323	284.745	0.921604	0.985574	0.16125	0.457268	no
C7_00970C_A	C7_00970C_A	C7_00970C_A	YOX1	Ca22chr7A_C_albicans_SC5314:205032-206040	37Control	37	OK	17.4818	33.1088	0.921361	1.08606	0.1266	0.395729	no
CR_01620C_A	CR_01620C_A	CR_01620C_A	MET6	Ca22chrRA_C_albicans_SC5314:368746-371050	37Control	37	OK	413.515	783.065	0.921192	0.582162	0.3663	0.716285	no
C7_04170W_A	C7_04170W_A	C7_04170W_A	C7_04170W_A	Ca22chr7A_C_albicans_SC5314:898904-899724	37Control	37	OK	8.61615	16.3154	0.921124	0.908076	0.1939	0.510784	no
C3_01120W_A	C3_01120W_A	C3_01120W_A	C3_01120W_A	Ca22chr3A_C_albicans_SC5314:226013-227075	37Control	37	OK	20.641	39.0824	0.921009	1.15796	0.0825	0.305342	no
C1_02820W_A	C1_02820W_A	C1_02820W_A	LYS2	Ca22chr1A_C_albicans_SC5314:588901-593116	37Control	37	OK	22.0568	41.753	0.920656	1.10584	0.12635	0.395341	no
C1_06380C_A	C1_06380C_A	C1_06380C_A	C1_06380C_A	Ca22chr1A_C_albicans_SC5314:1359376-1359700	37Control	37	OK	129.726	245.433	0.919867	1.07552	0.1347	0.408349	no
CR_02600W_A	CR_02600W_A	CR_02600W_A	CR_02600W_A	Ca22chrRA_C_albicans_SC5314:581328-581982	37Control	37	OK	10.2972	19.4784	0.919614	0.846533	0.23755	0.570332	no
C7_02840C_A	C7_02840C_A	C7_02840C_A	ERG5	Ca22chr7A_C_albicans_SC5314:612137-613691	37Control	37	OK	203.952	385.768	0.919501	0.802636	0.25795	0.596646	no
C7_03720C_A	C7_03720C_A	C7_03720C_A	HIS7	Ca22chr7A_C_albicans_SC5314:827987-829871	37Control	37	OK	42.2828	79.9628	0.919256	1.12393	0.09595	0.334422	no
C2_00180C_A	C2_00180C_A	C2_00180C_A	C2_00180C_A	Ca22chr2A_C_albicans_SC5314:24904-25816	37Control	37	OK	31.4124	59.3751	0.918526	1.15188	0.1028	0.348809	no
C7_01350C_A	C7_01350C_A	C7_01350C_A	C7_01350C_A	Ca22chr7A_C_albicans_SC5314:275785-276745	37Control	37	OK	38.2271	72.25	0.918402	1.17656	0.0916	0.32418	no
CR_03760W_A	CR_03760W_A	CR_03760W_A	CR_03760W_A	Ca22chrRA_C_albicans_SC5314:839135-839924	37Control	37	OK	82.3287	155.577	0.918163	1.17565	0.08985	0.320637	no
C1_00510W_A	C1_00510W_A	C1_00510W_A	C1_00510W_A	Ca22chr1A_C_albicans_SC5314:80123-81053	37Control	37	OK	41.757	78.897	0.917952	1.14025	0.1117	0.366975	no
C2_08680W_A	C2_08680W_A	C2_08680W_A	MSH3	Ca22chr2A_C_albicans_SC5314:1764312-1768830	37Control	37	OK	6.47584	12.2299	0.91728	0.784456	0.2493	0.586286	no
C2_03560C_A	C2_03560C_A	C2_03560C_A	C2_03560C_A	Ca22chr2A_C_albicans_SC5314:755205-756342	37Control	37	OK	97.7551	184.578	0.916985	1.1022	0.13	0.400876	no
C1_12550C_A	C1_12550C_A	C1_12550C_A	CDC54	Ca22chr1A_C_albicans_SC5314:2738856-2741595	37Control	37	OK	11.6029	21.8889	0.915712	1.15579	0.0946	0.331311	no
CR_10700W_A	CR_10700W_A	CR_10700W_A	RFC4	Ca22chrRA_C_albicans_SC5314:2266417-2268957	37Control	37	OK	57.0264	107.547	0.915265	0.847577	0.217	0.545468	no
CR_01330W_A	CR_01330W_A	CR_01330W_A	CPA2	Ca22chrRA_C_albicans_SC5314:318321-321771	37Control	37	OK	14.07	26.5269	0.914833	1.07656	0.1241	0.391266	no
CR_05970C_A	CR_05970C_A	CR_05970C_A	CR_05970C_A	Ca22chrRA_C_albicans_SC5314:1249892-1251227	37Control	37	OK	45.1332	85.0728	0.914508	1.17056	0.09135	0.32366	no
C6_01930W_A	C6_01930W_A	C6_01930W_A	YHM1	Ca22chr6A_C_albicans_SC5314:397027-397942	37Control	37	OK	107.249	202.154	0.914483	1.09654	0.1153	0.373589	no
C4_06850C_A	C4_06850C_A	C4_06850C_A	C4_06850C_A	Ca22chr4A_C_albicans_SC5314:1530447-1531563	37Control	37	OK	115.596	217.846	0.91422	1.08484	0.11995	0.382666	no
C5_01340W_A	C5_01340W_A	C5_01340W_A	HST3	Ca22chr5A_C_albicans_SC5314:297627-299091	37Control	37	OK	23.9371	45.1101	0.914202	1.15537	0.09505	0.332578	no
C2_06000W_A	C2_06000W_A	C2_06000W_A	LAS1	Ca22chr2A_C_albicans_SC5314:1223237-1224716	37Control	37	OK	30.1625	56.7922	0.912937	1.10591	0.112	0.367384	no
C2_05270W_A	C2_05270W_A	C2_05270W_A	C2_05270W_A	Ca22chr2A_C_albicans_SC5314:1086617-1089464	37Control	37	OK	31.8934	60.0126	0.912008	1.0871	0.1295	0.400317	no
C7_03120W_A	C7_03120W_A	C7_03120W_A	TIM54	Ca22chr7A_C_albicans_SC5314:676793-677996	37Control	37	OK	81.8007	153.913	0.91193	1.07728	0.13165	0.403388	no
C1_05920W_A	C1_05920W_A	C1_05920W_A	C1_05920W_A	Ca22chr1A_C_albicans_SC5314:1236304-1238380	37Control	37	OK	9.6994	18.2417	0.911272	1.06039	0.11535	0.373687	no
C3_00840C_A	C3_00840C_A	C3_00840C_A	C3_00840C_A	Ca22chr3A_C_albicans_SC5314:167935-168433	37Control	37	OK	132.929	249.898	0.910686	1.16448	0.0924	0.326085	no
C2_10260C_A	C2_10260C_A	C2_10260C_A	CMK2	Ca22chr2A_C_albicans_SC5314:2112283-2113717	37Control	37	OK	38.2207	71.8503	0.910641	1.02725	0.12605	0.394731	no
C5_02890W_A	C5_02890W_A	C5_02890W_A	YNK1	Ca22chr5A_C_albicans_SC5314:641752-642208	37Control	37	OK	1358.29	2552.59	0.910171	0.75042	0.2795	0.622932	no
C1_01050C_A	C1_01050C_A	C1_01050C_A	C1_01050C_A	Ca22chr1A_C_albicans_SC5314:206476-207855	37Control	37	OK	98.754	185.474	0.909309	0.694674	0.32945	0.678756	no
C3_04390W_A	C3_04390W_A	C3_04390W_A	CUP5	Ca22chr3A_C_albicans_SC5314:912023-912804	37Control	37	OK	671.474	1260.67	0.90879	0.915455	0.1978	0.516937	no
C1_09480W_A	C1_09480W_A	C1_09480W_A	PPT2	Ca22chr1A_C_albicans_SC5314:2089905-2090313	37Control	37	OK	97.6365	183.23	0.908164	1.15411	0.0913	0.323544	no
C7_01490W_A	C7_01490W_A	C7_01490W_A	C7_01490W_A	Ca22chr7A_C_albicans_SC5314:312569-313262	37Control	37	OK	111.428	209.051	0.907744	1.10559	0.105	0.353093	no
C3_05890W_A	C3_05890W_A	C3_05890W_A	TRM12	Ca22chr3A_C_albicans_SC5314:1321856-1323116	37Control	37	OK	19.3845	36.3617	0.907518	1.15262	0.0913	0.323544	no
CR_07170W_A	CR_07170W_A	CR_07170W_A	CR_07170W_A	Ca22chrRA_C_albicans_SC5314:1563255-1564104	37Control	37	OK	25.032	46.951	0.90738	1.07035	0.1346	0.408178	no
CR_07010W_A	CR_07010W_A	CR_07010W_A	MIS11	Ca22chrRA_C_albicans_SC5314:1507085-1509926	37Control	37	OK	83.867	157.299	0.907336	0.811235	0.2365	0.569383	no
C3_01200W_A	C3_01200W_A	C3_01200W_A	UTP20	Ca22chr3A_C_albicans_SC5314:249961-257464	37Control	37	OK	8.64841	16.2172	0.907016	1.14533	0.0909	0.322612	no
C1_10560C_A	C1_10560C_A	C1_10560C_A	C1_10560C_A	Ca22chr1A_C_albicans_SC5314:2337546-2339439	37Control	37	OK	4.88176	9.14996	0.906364	0.96655	0.17365	0.477823	no
CR_03610C_A	CR_03610C_A	CR_03610C_A	VTC3	Ca22chrRA_C_albicans_SC5314:796560-798915	37Control	37	OK	49.9227	93.5708	0.906361	1.02187	0.1517	0.439648	no
CR_04580W_A	CR_04580W_A	CR_04580W_A	CR_04580W_A	Ca22chrRA_C_albicans_SC5314:1004037-1004661	37Control	37	OK	230.789	432.534	0.906236	1.08174	0.1278	0.397424	no
C5_04580C_A	C5_04580C_A	C5_04580C_A	C5_04580C_A	Ca22chr5A_C_albicans_SC5314:996126-996717	37Control	37	OK	37.6978	70.6478	0.906164	1.06701	0.12805	0.397424	no
C7_01210C_A	C7_01210C_A	C7_01210C_A	C7_01210C_A	Ca22chr7A_C_albicans_SC5314:253346-254183	37Control	37	OK	90.3672	169.315	0.905839	1.09688	0.1182	0.379138	no
CR_07590W_A	CR_07590W_A	CR_07590W_A	EMP24	Ca22chrRA_C_albicans_SC5314:1649717-1650320	37Control	37	OK	217.478	407.216	0.904928	1.01329	0.14595	0.428856	no
C2_01370C_A	C2_01370C_A	C2_01370C_A	C2_01370C_A	Ca22chr2A_C_albicans_SC5314:237214-239071	37Control	37	OK	36.523	68.3373	0.903871	1.09626	0.1187	0.380094	no
C2_09180W_A	C2_09180W_A	C2_09180W_A	C2_09180W_A	Ca22chr2A_C_albicans_SC5314:1884890-1885955	37Control	37	OK	15.1645	28.3518	0.902739	1.07074	0.1292	0.399981	no
C5_01590W_A	C5_01590W_A	C5_01590W_A	C5_01590W_A	Ca22chr5A_C_albicans_SC5314:353406-355008	37Control	37	OK	10.345	19.3407	0.902699	1.06446	0.139	0.416624	no
C3_02980C_A	C3_02980C_A	C3_02980C_A	C3_02980C_A	Ca22chr3A_C_albicans_SC5314:636146-636803	37Control	37	NOTEST	0.0102996	0.0192553	0.902663	0	1	1	no
C3_01860C_A	C3_01860C_A	C3_01860C_A	DBP5	Ca22chr3A_C_albicans_SC5314:410207-411830	37Control	37	OK	114.945	214.743	0.901665	0.972684	0.17585	0.481205	no
C3_02550C_A	C3_02550C_A	C3_02550C_A	DCG1	Ca22chr3A_C_albicans_SC5314:553677-554376	37Control	37	OK	14.756	27.5506	0.900785	0.915711	0.20345	0.526082	no
C5_01110W_A	C5_01110W_A	C5_01110W_A	C5_01110W_A	Ca22chr5A_C_albicans_SC5314:253332-254304	37Control	37	OK	56.5553	105.591	0.90075	1.14734	0.09785	0.338725	no
CR_05800C_A	CR_05800C_A	CR_05800C_A	CR_05800C_A	Ca22chrRA_C_albicans_SC5314:1228645-1229050	37Control	37	OK	127.584	238.127	0.900286	1.11396	0.12605	0.394731	no
C1_00530C_A	C1_00530C_A	C1_00530C_A	C1_00530C_A	Ca22chr1A_C_albicans_SC5314:82116-84558	37Control	37	OK	9.23947	17.2395	0.899839	1.11031	0.11595	0.37505	no
C1_03340C_A	C1_03340C_A	C1_03340C_A	SEC62	Ca22chr1A_C_albicans_SC5314:696018-696900	37Control	37	OK	109.747	204.593	0.898572	1.07818	0.12235	0.387891	no
C1_09630W_A	C1_09630W_A	C1_09630W_A	IDH1	Ca22chr1A_C_albicans_SC5314:2120304-2121618	37Control	37	OK	681.251	1269.53	0.89803	0.723437	0.31765	0.667366	no
C1_00400W_A	C1_00400W_A	C1_00400W_A	SVF1	Ca22chr1A_C_albicans_SC5314:63201-64350	37Control	37	OK	106.151	197.732	0.897428	1.02376	0.1519	0.440024	no
C1_04050C_A	C1_04050C_A	C1_04050C_A	MFALPHA	Ca22chr1A_C_albicans_SC5314:851795-852227	37Control	37	OK	0.70364	1.3107	0.897427	0.517191	0.45665	0.797275	no
C5_01700W_A	C5_01700W_A	C5_01700W_A	C5_01700W_A	Ca22chr5A_C_albicans_SC5314:384425-385058	37Control	37	OK	209.599	390.281	0.896878	1.05822	0.12945	0.400294	no
C4_00700C_A	C4_00700C_A	C4_00700C_A	C4_00700C_A	Ca22chr4A_C_albicans_SC5314:119422-120388	37Control	37	OK	46.4058	86.3937	0.89662	1.13927	0.0991	0.340798	no
C4_01010C_A	C4_01010C_A	C4_01010C_A	DAG7	Ca22chr4A_C_albicans_SC5314:199442-200198	37Control	37	OK	202.439	376.836	0.896448	0.992809	0.16215	0.458917	no
C3_03710W_A	C3_03710W_A	C3_03710W_A	CCC1	Ca22chr3A_C_albicans_SC5314:782644-783583	37Control	37	OK	121.554	226.252	0.896331	0.888477	0.21795	0.546847	no
C1_09460W_A	C1_09460W_A	C1_09460W_A	ERG12	Ca22chr1A_C_albicans_SC5314:2087337-2088633	37Control	37	OK	81.2733	151.136	0.894989	1.01118	0.16455	0.46272	no
C6_01610W_A	C6_01610W_A	C6_01610W_A	ANB1	Ca22chr6A_C_albicans_SC5314:331190-332384	37Control	37	OK	3180.52	5911.61	0.894288	0.720174	0.27955	0.622932	no
C3_06130W_A	C3_06130W_A	C3_06130W_A	C3_06130W_A	Ca22chr3A_C_albicans_SC5314:1395596-1395914	37Control	37	OK	2.97884	5.53329	0.893385	0.65393	0.3763	0.726531	no
CR_07770C_A	CR_07770C_A	CR_07770C_A	PTC6	Ca22chrRA_C_albicans_SC5314:1682500-1683802	37Control	37	OK	26.3567	48.9492	0.893117	1.14099	0.0989	0.340607	no
C2_05000C_A	C2_05000C_A	C2_05000C_A	MRPL10	Ca22chr2A_C_albicans_SC5314:1040956-1041808	37Control	37	OK	113.282	210.32	0.892673	1.1203	0.0928	0.32683	no
C1_06180W_A	C1_06180W_A	C1_06180W_A	TLO34	Ca22chr1A_C_albicans_SC5314:1292810-1293806	37Control	37	OK	35.683	66.2298	0.892244	0.539933	0.4263	0.774063	no
C1_08110W_A	C1_08110W_A	C1_08110W_A	C1_08110W_A	Ca22chr1A_C_albicans_SC5314:1768989-1772265	37Control	37	OK	54.1476	100.481	0.891948	0.979062	0.17595	0.481339	no
C2_09930W_A	C2_09930W_A	C2_09930W_A	C2_09930W_A	Ca22chr2A_C_albicans_SC5314:2028005-2029757	37Control	37	OK	16.5026	30.618	0.891689	1.11114	0.1264	0.395341	no
C1_08670W_A	C1_08670W_A	C1_08670W_A	SWI6	Ca22chr1A_C_albicans_SC5314:1892914-1895104	37Control	37	OK	19.3161	35.8298	0.891353	1.14392	0.1017	0.346011	no
C3_06580W_A	C3_06580W_A	C3_06580W_A	JEN1	Ca22chr3A_C_albicans_SC5314:1501917-1503543	37Control	37	OK	0.740189	1.37284	0.891194	0.632383	0.3839	0.733045	no
C6_03070C_A	C6_03070C_A	C6_03070C_A	C6_03070C_A	Ca22chr6A_C_albicans_SC5314:646160-646484	37Control	37	OK	10.3582	19.1914	0.889684	0.751124	0.23565	0.569326	no
C1_06210W_A	C1_06210W_A	C1_06210W_A	BUD16	Ca22chr1A_C_albicans_SC5314:1297211-1298261	37Control	37	OK	18.8676	34.9343	0.888732	1.05272	0.14055	0.41887	no
C3_02850C_A	C3_02850C_A	C3_02850C_A	C3_02850C_A	Ca22chr3A_C_albicans_SC5314:615472-617427	37Control	37	OK	14.9697	27.6913	0.887384	0.920622	0.19445	0.511875	no
C1_13970C_A	C1_13970C_A	C1_13970C_A	HPC2	Ca22chr1A_C_albicans_SC5314:3078502-3080161	37Control	37	OK	14.9922	27.7095	0.886169	1.09023	0.11785	0.37866	no
C5_03550W_A	C5_03550W_A	C5_03550W_A	C5_03550W_A	Ca22chr5A_C_albicans_SC5314:794501-796880	37Control	37	OK	45.5183	84.1276	0.886132	1.06595	0.13275	0.405111	no
CR_03200C_A	CR_03200C_A	CR_03200C_A	CR_03200C_A	Ca22chrRA_C_albicans_SC5314:719188-721528	37Control	37	OK	15.8672	29.3219	0.885931	1.16018	0.0817	0.303515	no
CR_00570W_A	CR_00570W_A	CR_00570W_A	CR_00570W_A	Ca22chrRA_C_albicans_SC5314:134038-135571	37Control	37	OK	70.4465	130.097	0.884986	1.05473	0.1366	0.41245	no
C3_06920W_A	C3_06920W_A	C3_06920W_A	C3_06920W_A	Ca22chr3A_C_albicans_SC5314:1584074-1585043	37Control	37	OK	81.5792	150.625	0.884686	1.00662	0.1338	0.406668	no
C1_05770C_A	C1_05770C_A	C1_05770C_A	PRC3	Ca22chr1A_C_albicans_SC5314:1206047-1207700	37Control	37	OK	34.3395	63.3855	0.884283	1.08878	0.1211	0.385124	no
C5_02740W_A	C5_02740W_A	C5_02740W_A	C5_02740W_A	Ca22chr5A_C_albicans_SC5314:614912-616580	37Control	37	OK	26.7153	49.3027	0.884001	1.12267	0.0987	0.340292	no
CR_04870C_A	CR_04870C_A	CR_04870C_A	CR_04870C_A	Ca22chrRA_C_albicans_SC5314:1054454-1055960	37Control	37	OK	9.11085	16.8117	0.883806	1.01481	0.15405	0.443931	no
C3_01980C_A	C3_01980C_A	C3_01980C_A	TOM6	Ca22chr3A_C_albicans_SC5314:435717-435888	37Control	37	OK	2617.21	4824.71	0.88241	1.12047	0.09825	0.339362	no
C2_06530W_A	C2_06530W_A	C2_06530W_A	C2_06530W_A	Ca22chr2A_C_albicans_SC5314:1324472-1325444	37Control	37	OK	32.94	60.666	0.881047	1.04256	0.1331	0.40585	no
C1_01000C_A	C1_01000C_A	C1_01000C_A	C1_01000C_A	Ca22chr1A_C_albicans_SC5314:202531-203623	37Control	37	OK	24.6186	45.333	0.880812	1.09626	0.12585	0.394604	no
C2_02670C_A	C2_02670C_A	C2_02670C_A	C2_02670C_A	Ca22chr2A_C_albicans_SC5314:536191-537440	37Control	37	OK	29.8065	54.8149	0.878941	0.472917	0.5049	0.828192	no
C1_14390W_A	C1_14390W_A	C1_14390W_A	RPC10	Ca22chr1A_C_albicans_SC5314:3167370-3167592	37Control	37	OK	1893.66	3482.18	0.878815	1.07698	0.1196	0.382067	no
C2_01160W_A	C2_01160W_A	C2_01160W_A	C2_01160W_A	Ca22chr2A_C_albicans_SC5314:188328-189579	37Control	37	OK	38.9784	71.65	0.87829	1.12795	0.1066	0.356248	no
C1_08470W_A	C1_08470W_A	C1_08470W_A	C1_08470W_A	Ca22chr1A_C_albicans_SC5314:1861220-1861655	37Control	37	OK	144.547	265.494	0.87714	1.14296	0.08535	0.311303	no
C2_01960C_A	C2_01960C_A	C2_01960C_A	C2_01960C_A	Ca22chr2A_C_albicans_SC5314:367185-367519	37Control	37	OK	11.0986	20.3847	0.877113	0.666357	0.3337	0.683178	no
C1_02250W_A	C1_02250W_A	C1_02250W_A	CWH8	Ca22chr1A_C_albicans_SC5314:474918-475644	37Control	37	OK	114.163	209.65	0.876888	0.96928	0.16205	0.458703	no
C2_00400C_A	C2_00400C_A	C2_00400C_A	C2_00400C_A	Ca22chr2A_C_albicans_SC5314:57064-57796	37Control	37	OK	331.4	608.223	0.876029	0.942932	0.1749	0.479928	no
C1_04380W_A	C1_04380W_A	C1_04380W_A	SIT4	Ca22chr1A_C_albicans_SC5314:907131-908076	37Control	37	OK	68.796	126.243	0.875808	1.12046	0.10035	0.343279	no
C1_04730C_A	C1_04730C_A	C1_04730C_A	LYS21	Ca22chr1A_C_albicans_SC5314:982544-983831	37Control	37	OK	78.4319	143.808	0.874633	1.03843	0.14165	0.420949	no
C4_05040W_A	C4_05040W_A	C4_05040W_A	C4_05040W_A	Ca22chr4A_C_albicans_SC5314:1077189-1077411	37Control	37	OK	74.1465	135.929	0.874406	0.767153	0.2886	0.634354	no
C6_01880W_A	C6_01880W_A	C6_01880W_A	C6_01880W_A	Ca22chr6A_C_albicans_SC5314:389288-389918	37Control	37	OK	37.8812	69.4414	0.874316	1.069	0.11955	0.382067	no
C5_05200C_A	C5_05200C_A	C5_05200C_A	C5_05200C_A	Ca22chr5A_C_albicans_SC5314:1140238-1141543	37Control	37	OK	22.5753	41.3523	0.873222	1.04875	0.14535	0.428028	no
C1_00710C_A	C1_00710C_A	C1_00710C_A	TUB2	Ca22chr1A_C_albicans_SC5314:123868-125597	37Control	37	OK	172.511	315.797	0.872304	0.87301	0.207	0.530383	no
C1_10720C_A	C1_10720C_A	C1_10720C_A	MNN2	Ca22chr1A_C_albicans_SC5314:2378685-2380479	37Control	37	OK	41.7344	76.3451	0.8713	1.09271	0.1014	0.34549	no
C3_01630W_A	C3_01630W_A	C3_01630W_A	TFP1	Ca22chr3A_C_albicans_SC5314:355873-357804	37Control	37	OK	87.4513	159.943	0.871007	0.843726	0.23655	0.569383	no
C4_06340W_A	C4_06340W_A	C4_06340W_A	AGO1	Ca22chr4A_C_albicans_SC5314:1407065-1409819	37Control	37	OK	13.086	23.8976	0.868837	0.998992	0.1473	0.43141	no
C5_03860W_A	C5_03860W_A	C5_03860W_A	HAM1	Ca22chr5A_C_albicans_SC5314:846255-846864	37Control	37	OK	192.639	351.725	0.868546	1.03765	0.14605	0.429029	no
C3_02100W_A	C3_02100W_A	C3_02100W_A	STE50	Ca22chr3A_C_albicans_SC5314:456046-457429	37Control	37	OK	31.8756	58.1185	0.866544	1.1126	0.1094	0.361881	no
C3_00950C_A	C3_00950C_A	C3_00950C_A	C3_00950C_A	Ca22chr3A_C_albicans_SC5314:193059-194184	37Control	37	OK	25.1303	45.8024	0.865998	1.11193	0.1124	0.36844	no
CR_01300W_A	CR_01300W_A	CR_01300W_A	CR_01300W_A	Ca22chrRA_C_albicans_SC5314:310825-311203	37Control	37	OK	562.355	1024.54	0.865422	1.0777	0.1375	0.413774	no
C2_09350W_A	C2_09350W_A	C2_09350W_A	TAZ1	Ca22chr2A_C_albicans_SC5314:1904444-1905677	37Control	37	OK	32.6591	59.4947	0.865278	1.00799	0.13815	0.415001	no
CR_07420W_A	CR_07420W_A	CR_07420W_A	KGD2	Ca22chrRA_C_albicans_SC5314:1609156-1610482	37Control	37	OK	162.146	295.078	0.863802	0.927395	0.17495	0.479928	no
C1_00740C_A	C1_00740C_A	C1_00740C_A	SPE1	Ca22chr1A_C_albicans_SC5314:129259-130681	37Control	37	OK	140.051	254.863	0.863769	0.944902	0.1894	0.502868	no
C2_06820C_A	C2_06820C_A	C2_06820C_A	PRE2	Ca22chr2A_C_albicans_SC5314:1396739-1397597	37Control	37	OK	210.139	382.348	0.863543	0.879205	0.2056	0.529027	no
C5_01520C_A	C5_01520C_A	C5_01520C_A	GLR1	Ca22chr5A_C_albicans_SC5314:338742-340293	37Control	37	OK	64.6454	117.499	0.862026	1.0069	0.14025	0.418589	no
CR_07020W_A	CR_07020W_A	CR_07020W_A	CR_07020W_A	Ca22chrRA_C_albicans_SC5314:1510567-1511113	37Control	37	OK	228.905	415.785	0.86109	1.07485	0.0988	0.340325	no
C1_02780W_A	C1_02780W_A	C1_02780W_A	C1_02780W_A	Ca22chr1A_C_albicans_SC5314:581843-582602	37Control	37	OK	104.383	189.552	0.860708	0.875344	0.21485	0.542361	no
C1_00060W_A	C1_00060W_A	C1_00060W_A	TUP1	Ca22chr1A_C_albicans_SC5314:12162-13701	37Control	37	OK	116.113	210.814	0.860443	0.9196	0.1852	0.496618	no
CR_08130W_A	CR_08130W_A	CR_08130W_A	CR_08130W_A	Ca22chrRA_C_albicans_SC5314:1770027-1771158	37Control	37	OK	48.9425	88.8278	0.859925	1.1072	0.11085	0.365202	no
C4_00520W_A	C4_00520W_A	C4_00520W_A	PAM18	Ca22chr4A_C_albicans_SC5314:90445-90919	37Control	37	OK	198.971	361.113	0.859889	1.1012	0.11305	0.369798	no
C1_12810W_A	C1_12810W_A	C1_12810W_A	C1_12810W_A	Ca22chr1A_C_albicans_SC5314:2790163-2791078	37Control	37	OK	43.0331	78.0397	0.858761	1.12329	0.09125	0.323544	no
C1_06770W_A	C1_06770W_A	C1_06770W_A	C1_06770W_A	Ca22chr1A_C_albicans_SC5314:1444435-1445959	37Control	37	OK	34.8382	63.1317	0.857697	1.10198	0.1159	0.375017	no
C3_06520C_A	C3_06520C_A	C3_06520C_A	C3_06520C_A	Ca22chr3A_C_albicans_SC5314:1490883-1491810	37Control	37	OK	18.2493	33.06	0.857246	1.02596	0.14805	0.432933	no
C4_03770W_A	C4_03770W_A	C4_03770W_A	C4_03770W_A	Ca22chr4A_C_albicans_SC5314:800106-800601	37Control	37	OK	44.6237	80.796	0.856474	1.01999	0.15765	0.449968	no
C7_02890C_A	C7_02890C_A	C7_02890C_A	PMT1	Ca22chr7A_C_albicans_SC5314:624650-627284	37Control	37	OK	40.8578	73.9607	0.856148	0.873562	0.2188	0.547581	no
CR_02770C_A	CR_02770C_A	CR_02770C_A	CR_02770C_A	Ca22chrRA_C_albicans_SC5314:634964-636134	37Control	37	OK	23.1397	41.864	0.85534	1.01806	0.1562	0.447797	no
C2_01360C_A	C2_01360C_A	C2_01360C_A	DCW1	Ca22chr2A_C_albicans_SC5314:235004-236363	37Control	37	OK	66.5095	120.327	0.855329	1.04704	0.1309	0.402399	no
C1_06140C_A	C1_06140C_A	C1_06140C_A	C1_06140C_A	Ca22chr1A_C_albicans_SC5314:1286025-1286367	37Control	37	OK	7.88805	14.2639	0.854631	0.630862	0.3817	0.731365	no
C3_07210W_A	C3_07210W_A	C3_07210W_A	MET8	Ca22chr3A_C_albicans_SC5314:1652453-1653311	37Control	37	OK	32.8442	59.381	0.854365	1.06253	0.1289	0.399249	no
CR_06830C_A	CR_06830C_A	CR_06830C_A	SIW14	Ca22chrRA_C_albicans_SC5314:1463494-1464340	37Control	37	OK	38.0924	68.8628	0.854222	1.06073	0.13935	0.417208	no
C5_00850C_A	C5_00850C_A	C5_00850C_A	C5_00850C_A	Ca22chr5A_C_albicans_SC5314:197982-198300	37Control	37	OK	116.955	211.159	0.852371	1.00671	0.1602	0.45504	no
C6_03630W_A	C6_03630W_A	C6_03630W_A	PAD1	Ca22chr6A_C_albicans_SC5314:771817-772507	37Control	37	OK	28.9993	52.3331	0.851705	0.994099	0.1422	0.421985	no
C2_07680W_A	C2_07680W_A	C2_07680W_A	C2_07680W_A	Ca22chr2A_C_albicans_SC5314:1568149-1569013	37Control	37	OK	132.984	239.951	0.851485	1.0209	0.1534	0.442761	no
C5_01940W_A	C5_01940W_A	C5_01940W_A	C5_01940W_A	Ca22chr5A_C_albicans_SC5314:434180-435950	37Control	37	OK	18.9185	34.1346	0.851442	1.04778	0.1443	0.426002	no
C7_03990C_A	C7_03990C_A	C7_03990C_A	C7_03990C_A	Ca22chr7A_C_albicans_SC5314:869411-870218	37Control	37	OK	68.918	124.315	0.851052	1.08782	0.11845	0.379746	no
C1_07930C_A	C1_07930C_A	C1_07930C_A	ERD1	Ca22chr1A_C_albicans_SC5314:1726171-1727575	37Control	37	OK	10.934	19.7181	0.850693	1.01449	0.1595	0.45353	no
C2_03920C_A	C2_03920C_A	C2_03920C_A	GPI13	Ca22chr2A_C_albicans_SC5314:819246-822291	37Control	37	OK	7.20659	12.9953	0.850598	1.05053	0.1406	0.418953	no
C2_07310W_A	C2_07310W_A	C2_07310W_A	CCT5	Ca22chr2A_C_albicans_SC5314:1486612-1488259	37Control	37	OK	104.358	188.129	0.850187	0.916458	0.20055	0.521735	no
C1_10960W_A	C1_10960W_A	C1_10960W_A	C1_10960W_A	Ca22chr1A_C_albicans_SC5314:2418400-2419166	37Control	37	OK	80.2292	144.603	0.849898	1.11136	0.0929	0.32706	no
C2_10140W_A	C2_10140W_A	C2_10140W_A	C2_10140W_A	Ca22chr2A_C_albicans_SC5314:2081129-2082971	37Control	37	OK	5.34188	9.62074	0.848801	0.898267	0.2074	0.530686	no
CR_01980C_A	CR_01980C_A	CR_01980C_A	CRC1	Ca22chrRA_C_albicans_SC5314:431373-432228	37Control	37	OK	124.005	223.264	0.848359	1.0142	0.15745	0.449738	no
CR_07270C_A	CR_07270C_A	CR_07270C_A	HGT16	Ca22chrRA_C_albicans_SC5314:1582852-1584550	37Control	37	OK	7.31772	13.1614	0.846852	0.957667	0.17315	0.476935	no
C1_12010C_A	C1_12010C_A	C1_12010C_A	KIP4	Ca22chr1A_C_albicans_SC5314:2626510-2629225	37Control	37	OK	7.44531	13.3863	0.846356	1.05246	0.1324	0.404567	no
C2_07140W_A	C2_07140W_A	C2_07140W_A	C2_07140W_A	Ca22chr2A_C_albicans_SC5314:1457731-1458469	37Control	37	OK	124.516	223.856	0.846236	0.951353	0.1463	0.429215	no
C4_01880W_A	C4_01880W_A	C4_01880W_A	TYR1	Ca22chr4A_C_albicans_SC5314:367891-369211	37Control	37	OK	27.5277	49.435	0.844649	1.10336	0.09635	0.335011	no
C4_04850C_A	C4_04850C_A	C4_04850C_A	CSR1	Ca22chr4A_C_albicans_SC5314:1042164-1044021	37Control	37	OK	6.86285	12.3217	0.844327	0.996365	0.15305	0.442471	no
C5_05100C_A	C5_05100C_A	C5_05100C_A	DUN1	Ca22chr5A_C_albicans_SC5314:1122898-1124587	37Control	37	OK	13.2568	23.8015	0.844324	1.03419	0.1258	0.394513	no
C4_00540C_A	C4_00540C_A	C4_00540C_A	NMD5	Ca22chr4A_C_albicans_SC5314:93724-96778	37Control	37	OK	33.4265	59.9658	0.843149	1.0125	0.15735	0.449738	no
C1_04170C_A	C1_04170C_A	C1_04170C_A	HTA2	Ca22chr1A_C_albicans_SC5314:870670-871066	37Control	37	OK	1537.17	2756.37	0.842491	0.732753	0.297	0.644355	no
CR_03740C_A	CR_03740C_A	CR_03740C_A	CR_03740C_A	Ca22chrRA_C_albicans_SC5314:836036-836567	37Control	37	OK	150.989	270.728	0.842401	1.08029	0.12235	0.387891	no
C7_01850C_A	C7_01850C_A	C7_01850C_A	CRN1	Ca22chr7A_C_albicans_SC5314:399686-402020	37Control	37	OK	37.4784	67.195	0.842294	0.993154	0.15105	0.43898	no
C3_05710W_A	C3_05710W_A	C3_05710W_A	RCT1	Ca22chr3A_C_albicans_SC5314:1279080-1279656	37Control	37	OK	1378.3	2471.15	0.842292	0.69754	0.33245	0.681656	no
C2_06100W_A	C2_06100W_A	C2_06100W_A	PMT4	Ca22chr2A_C_albicans_SC5314:1246013-1248281	37Control	37	OK	60.5649	108.476	0.840821	0.846248	0.2206	0.549313	no
CR_05160C_A	CR_05160C_A	CR_05160C_A	CR_05160C_A	Ca22chrRA_C_albicans_SC5314:1115648-1116845	37Control	37	OK	11.7798	21.0903	0.840268	0.997986	0.1582	0.450923	no
CR_07810W_A	CR_07810W_A	CR_07810W_A	YHB5	Ca22chrRA_C_albicans_SC5314:1696869-1698072	37Control	37	OK	66.6694	119.363	0.840264	0.848917	0.1739	0.478092	no
CR_00880W_A	CR_00880W_A	CR_00880W_A	CR_00880W_A	Ca22chrRA_C_albicans_SC5314:200120-201206	37Control	37	OK	15.33	27.4427	0.840063	1.00229	0.1638	0.4613	no
C5_04510W_A	C5_04510W_A	C5_04510W_A	GDE1	Ca22chr5A_C_albicans_SC5314:984133-987622	37Control	37	OK	9.71499	17.3902	0.839993	1.06361	0.1253	0.393863	no
C2_00850W_A	C2_00850W_A	C2_00850W_A	MSF1	Ca22chr2A_C_albicans_SC5314:144759-146100	37Control	37	OK	60.3681	108.047	0.8398	1.03105	0.143	0.423625	no
C1_02620C_A	C1_02620C_A	C1_02620C_A	HOM6	Ca22chr1A_C_albicans_SC5314:549493-550573	37Control	37	OK	209.522	374.997	0.839775	0.809453	0.21575	0.543739	no
C6_03720W_A	C6_03720W_A	C6_03720W_A	ALA1	Ca22chr6A_C_albicans_SC5314:804197-807107	37Control	37	OK	89.6066	160.363	0.839662	0.792695	0.27735	0.619972	no
C3_05070W_A	C3_05070W_A	C3_05070W_A	CEM1	Ca22chr3A_C_albicans_SC5314:1091283-1092609	37Control	37	OK	15.3159	27.3956	0.838921	0.985246	0.1709	0.473507	no
C1_05070C_A	C1_05070C_A	C1_05070C_A	GPI7	Ca22chr1A_C_albicans_SC5314:1059227-1061885	37Control	37	OK	10.5392	18.846	0.838491	1.07529	0.1268	0.395869	no
C5_01640W_A	C5_01640W_A	C5_01640W_A	MAS2	Ca22chr5A_C_albicans_SC5314:360947-362516	37Control	37	OK	58.332	104.27	0.837964	0.999593	0.1277	0.397424	no
CR_01920W_A	CR_01920W_A	CR_01920W_A	CR_01920W_A	Ca22chrRA_C_albicans_SC5314:423364-424666	37Control	37	OK	0.980938	1.75288	0.837491	0.610466	0.37935	0.729236	no
C4_06800W_A	C4_06800W_A	C4_06800W_A	C4_06800W_A	Ca22chr4A_C_albicans_SC5314:1514781-1516158	37Control	37	OK	74.4265	132.846	0.835865	1.00154	0.162	0.458631	no
C6_04100W_A	C6_04100W_A	C6_04100W_A	C6_04100W_A	Ca22chr6A_C_albicans_SC5314:890052-891459	37Control	37	OK	154.854	276.397	0.835835	0.902061	0.1665	0.466051	no
C4_03590C_A	C4_03590C_A	C4_03590C_A	OSH3	Ca22chr4A_C_albicans_SC5314:766846-769381	37Control	37	OK	22.435	40.042	0.835765	1.01864	0.1403	0.418589	no
C5_01130W_A	C5_01130W_A	C5_01130W_A	CYC3	Ca22chr5A_C_albicans_SC5314:261872-262667	37Control	37	OK	157.112	280.403	0.835708	0.880169	0.19805	0.517518	no
C7_03080W_A	C7_03080W_A	C7_03080W_A	LMO1	Ca22chr7A_C_albicans_SC5314:669561-671481	37Control	37	OK	31.2412	55.7373	0.835196	1.07425	0.1282	0.397604	no
C1_12020W_A	C1_12020W_A	C1_12020W_A	C1_12020W_A	Ca22chr1A_C_albicans_SC5314:2631950-2632376	37Control	37	OK	0.65301	1.16482	0.834924	0.557669	0.42715	0.774759	no
C3_04700W_A	C3_04700W_A	C3_04700W_A	C3_04700W_A	Ca22chr3A_C_albicans_SC5314:994722-995823	37Control	37	OK	25.3097	45.1297	0.834385	1.06775	0.1202	0.383009	no
C4_05310W_A	C4_05310W_A	C4_05310W_A	C4_05310W_A	Ca22chr4A_C_albicans_SC5314:1156767-1158231	37Control	37	OK	12.8583	22.9269	0.83434	1.01741	0.13985	0.418124	no
C3_06750W_A	C3_06750W_A	C3_06750W_A	C3_06750W_A	Ca22chr3A_C_albicans_SC5314:1541632-1541839	37Control	37	OK	1296.97	2312.14	0.83408	1.00766	0.14925	0.435024	no
C1_01170C_A	C1_01170C_A	C1_01170C_A	ZCF17	Ca22chr1A_C_albicans_SC5314:236083-238300	37Control	37	OK	14.8435	26.4373	0.83274	1.0314	0.1474	0.431568	no
C2_02360C_A	C2_02360C_A	C2_02360C_A	C2_02360C_A	Ca22chr2A_C_albicans_SC5314:468488-469331	37Control	37	OK	14.9702	26.6597	0.83257	0.880057	0.2106	0.5356	no
C1_01770W_A	C1_01770W_A	C1_01770W_A	MAK32	Ca22chr1A_C_albicans_SC5314:366729-367860	37Control	37	OK	11.351	20.206	0.831966	0.938909	0.18215	0.491794	no
CR_02060W_A	CR_02060W_A	CR_02060W_A	CR_02060W_A	Ca22chrRA_C_albicans_SC5314:452956-453880	37Control	37	OK	36.1723	64.3522	0.831105	1.0566	0.1191	0.380986	no
C6_02650C_A	C6_02650C_A	C6_02650C_A	C6_02650C_A	Ca22chr6A_C_albicans_SC5314:539179-540637	37Control	37	OK	17.8139	31.6707	0.830147	1.06349	0.124	0.391082	no
C1_09000W_A	C1_09000W_A	C1_09000W_A	C1_09000W_A	Ca22chr1A_C_albicans_SC5314:1960294-1961950	37Control	37	OK	7.61172	13.5291	0.829773	0.962344	0.15265	0.441789	no
C1_07550W_A	C1_07550W_A	C1_07550W_A	SWD2	Ca22chr1A_C_albicans_SC5314:1635158-1636253	37Control	37	OK	30.357	53.9034	0.828348	1.05738	0.12505	0.393405	no
C5_00050W_A	C5_00050W_A	C5_00050W_A	C5_00050W_A	Ca22chr5A_C_albicans_SC5314:6531-8807	37Control	37	OK	20.2689	35.9895	0.828305	0.64295	0.3661	0.716262	no
C3_02060W_A	C3_02060W_A	C3_02060W_A	C3_02060W_A	Ca22chr3A_C_albicans_SC5314:448126-449398	37Control	37	OK	3.33888	5.92779	0.828131	0.781963	0.27235	0.61467	no
C6_01480W_A	C6_01480W_A	C6_01480W_A	C6_01480W_A	Ca22chr6A_C_albicans_SC5314:296920-297466	37Control	37	OK	7.89821	14.0015	0.825983	0.769332	0.25325	0.591147	no
C2_05030C_A	C2_05030C_A	C2_05030C_A	RHO3	Ca22chr2A_C_albicans_SC5314:1043452-1044176	37Control	37	OK	95.35	168.927	0.825099	1.06144	0.1312	0.402861	no
C4_05050C_A	C4_05050C_A	C4_05050C_A	PPG1	Ca22chr4A_C_albicans_SC5314:1077530-1078781	37Control	37	OK	24.9544	44.1771	0.824006	0.978982	0.18205	0.491671	no
CR_07640C_A	CR_07640C_A	CR_07640C_A	CR_07640C_A	Ca22chrRA_C_albicans_SC5314:1658502-1659099	37Control	37	OK	52.1433	92.2934	0.823745	1.04933	0.12535	0.393888	no
C7_03000C_A	C7_03000C_A	C7_03000C_A	C7_03000C_A	Ca22chr7A_C_albicans_SC5314:652100-652583	37Control	37	OK	234.305	414.695	0.823661	1.04133	0.116	0.375148	no
C4_06570C_A	C4_06570C_A	C4_06570C_A	PDC11	Ca22chr4A_C_albicans_SC5314:1468067-1469771	37Control	37	OK	2546.92	4506.13	0.823136	0.602278	0.3567	0.707428	no
C3_00450C_A	C3_00450C_A	C3_00450C_A	C3_00450C_A	Ca22chr3A_C_albicans_SC5314:63987-65094	37Control	37	OK	158.846	280.856	0.822203	0.884545	0.2194	0.548479	no
C1_07090C_A	C1_07090C_A	C1_07090C_A	C1_07090C_A	Ca22chr1A_C_albicans_SC5314:1514078-1516313	37Control	37	OK	29.1702	51.5735	0.822135	1.05082	0.1261	0.394731	no
C1_01600W_A	C1_01600W_A	C1_01600W_A	MRP20	Ca22chr1A_C_albicans_SC5314:323649-324531	37Control	37	OK	177.253	313.315	0.821806	0.964552	0.15695	0.449475	no
C2_08160C_A	C2_08160C_A	C2_08160C_A	C2_08160C_A	Ca22chr2A_C_albicans_SC5314:1654998-1655677	37Control	37	OK	543.757	959.174	0.81883	0.888266	0.20685	0.530287	no
C3_01670W_A	C3_01670W_A	C3_01670W_A	C3_01670W_A	Ca22chr3A_C_albicans_SC5314:360536-361334	37Control	37	OK	91.3666	161.138	0.818557	1.0522	0.13325	0.406045	no
CR_03790C_A	CR_03790C_A	CR_03790C_A	KRE1	Ca22chrRA_C_albicans_SC5314:844005-844398	37Control	37	OK	255.545	450.657	0.818453	0.9295	0.16655	0.466051	no
C1_08510W_A	C1_08510W_A	C1_08510W_A	EAF6	Ca22chr1A_C_albicans_SC5314:1866410-1867046	37Control	37	OK	45.0586	79.4256	0.817801	1.03623	0.12805	0.397424	no
C6_01870C_A	C6_01870C_A	C6_01870C_A	C6_01870C_A	Ca22chr6A_C_albicans_SC5314:386806-388339	37Control	37	OK	20.5186	36.1637	0.817609	1.04053	0.13015	0.400945	no
C2_07920W_A	C2_07920W_A	C2_07920W_A	C2_07920W_A	Ca22chr2A_C_albicans_SC5314:1612097-1613135	37Control	37	OK	28.7935	50.6865	0.815855	1.04193	0.1274	0.397084	no
C3_06050C_A	C3_06050C_A	C3_06050C_A	C3_06050C_A	Ca22chr3A_C_albicans_SC5314:1375403-1376279	37Control	37	OK	111.731	196.564	0.81497	0.9599	0.18715	0.499641	no
C2_10670W_A	C2_10670W_A	C2_10670W_A	C2_10670W_A	Ca22chr2A_C_albicans_SC5314:2196055-2197075	37Control	37	OK	133.439	234.501	0.813412	0.885485	0.1747	0.479661	no
C1_13060C_A	C1_13060C_A	C1_13060C_A	C1_13060C_A	Ca22chr1A_C_albicans_SC5314:2840956-2843242	37Control	37	OK	107.784	189.233	0.812019	0.789888	0.24635	0.581746	no
C5_00830C_A	C5_00830C_A	C5_00830C_A	ERV46	Ca22chr5A_C_albicans_SC5314:195363-196608	37Control	37	OK	65.3967	114.811	0.811975	0.995316	0.1492	0.435013	no
CR_08340W_A	CR_08340W_A	CR_08340W_A	CYS3	Ca22chrRA_C_albicans_SC5314:1805595-1806795	37Control	37	OK	940.554	1650.92	0.811689	0.65873	0.3339	0.683365	no
C3_01940C_A	C3_01940C_A	C3_01940C_A	C3_01940C_A	Ca22chr3A_C_albicans_SC5314:427509-428097	37Control	37	OK	112.455	197.356	0.811458	1.04052	0.13015	0.400945	no
C6_02400W_A	C6_02400W_A	C6_02400W_A	C6_02400W_A	Ca22chr6A_C_albicans_SC5314:498067-498158	37Control	37	OK	362.49	635.804	0.81064	0.582771	0.40695	0.755405	no
C1_00670C_A	C1_00670C_A	C1_00670C_A	UGA32	Ca22chr1A_C_albicans_SC5314:114126-115878	37Control	37	OK	8.72797	15.3072	0.810491	0.925141	0.1992	0.519299	no
C3_03560W_A	C3_03560W_A	C3_03560W_A	C3_03560W_A	Ca22chr3A_C_albicans_SC5314:755824-757297	37Control	37	OK	28.6007	50.1524	0.810265	1.06145	0.11155	0.366546	no
C6_00520W_A	C6_00520W_A	C6_00520W_A	C6_00520W_A	Ca22chr6A_C_albicans_SC5314:97677-97992	37Control	37	OK	86.9421	152.332	0.809096	0.93356	0.16255	0.459497	no
C5_03810C_A	C5_03810C_A	C5_03810C_A	C5_03810C_A	Ca22chr5A_C_albicans_SC5314:839330-840098	37Control	37	OK	39.632	69.3918	0.808099	1.00058	0.15325	0.442582	no
C4_07030W_A	C4_07030W_A	C4_07030W_A	MET16	Ca22chr4A_C_albicans_SC5314:1553709-1554468	37Control	37	OK	136.488	238.969	0.808055	0.957509	0.184	0.494667	no
C7_03530C_A	C7_03530C_A	C7_03530C_A	ISY1	Ca22chr7A_C_albicans_SC5314:780463-781264	37Control	37	OK	29.3471	51.3469	0.80706	0.980511	0.15125	0.439019	no
C4_04160W_A	C4_04160W_A	C4_04160W_A	C4_04160W_A	Ca22chr4A_C_albicans_SC5314:888266-889790	37Control	37	OK	86.7443	151.757	0.806925	0.893803	0.20785	0.531316	no
C5_00260W_A	C5_00260W_A	C5_00260W_A	C5_00260W_A	Ca22chr5A_C_albicans_SC5314:43420-44635	37Control	37	OK	213.733	373.731	0.806193	0.815723	0.24165	0.575408	no
C1_14320C_A	C1_14320C_A	C1_14320C_A	C1_14320C_A	Ca22chr1A_C_albicans_SC5314:3156046-3156742	37Control	37	OK	93.5396	163.206	0.803047	0.985238	0.1531	0.442547	no
C4_04870C_A	C4_04870C_A	C4_04870C_A	C4_04870C_A	Ca22chr4A_C_albicans_SC5314:1049785-1052143	37Control	37	OK	44.7333	78.0456	0.802968	0.964462	0.18075	0.489911	no
C1_07240W_A	C1_07240W_A	C1_07240W_A	YPD1	Ca22chr1A_C_albicans_SC5314:1553507-1554062	37Control	37	OK	116.376	203.011	0.802767	1.03078	0.13165	0.403388	no
C1_04420C_A	C1_04420C_A	C1_04420C_A	URA6	Ca22chr1A_C_albicans_SC5314:915264-916104	37Control	37	OK	169.671	295.609	0.80095	0.899943	0.2081	0.531683	no
C1_08580C_A	C1_08580C_A	C1_08580C_A	VCX1	Ca22chr1A_C_albicans_SC5314:1877921-1879172	37Control	37	OK	40.579	70.6858	0.800688	0.958438	0.1489	0.434699	no
C1_11220C_A	C1_11220C_A	C1_11220C_A	TIM50	Ca22chr1A_C_albicans_SC5314:2468076-2469486	37Control	37	OK	157.472	274.278	0.800539	0.863239	0.2137	0.540855	no
C2_04340C_A	C2_04340C_A	C2_04340C_A	C2_04340C_A	Ca22chr2A_C_albicans_SC5314:907654-908230	37Control	37	OK	24.2713	42.265	0.800211	0.811351	0.26155	0.600402	no
C1_03440C_A	C1_03440C_A	C1_03440C_A	C1_03440C_A	Ca22chr1A_C_albicans_SC5314:721114-722551	37Control	37	OK	46.907	81.652	0.799685	1.01909	0.1366	0.41245	no
C1_08320W_A	C1_08320W_A	C1_08320W_A	TKL1	Ca22chr1A_C_albicans_SC5314:1826585-1828619	37Control	37	OK	280.407	487.825	0.798843	0.639468	0.3503	0.701233	no
C7_03630C_A	C7_03630C_A	C7_03630C_A	TIM9	Ca22chr7A_C_albicans_SC5314:809085-809449	37Control	37	OK	443.147	770.825	0.798619	1.04433	0.1162	0.375601	no
C2_05580W_A	C2_05580W_A	C2_05580W_A	C2_05580W_A	Ca22chr2A_C_albicans_SC5314:1134956-1139015	37Control	37	OK	11.08	19.2691	0.798334	0.9938	0.15665	0.448882	no
C3_07220C_A	C3_07220C_A	C3_07220C_A	PRO2	Ca22chr3A_C_albicans_SC5314:1653320-1654661	37Control	37	OK	65.8077	114.41	0.797885	0.944103	0.19525	0.51355	no
CR_09840C_A	CR_09840C_A	CR_09840C_A	CR_09840C_A	Ca22chrRA_C_albicans_SC5314:2098779-2099424	37Control	37	OK	27.42	47.6627	0.797631	0.950169	0.17715	0.483498	no
CR_08930C_A	CR_08930C_A	CR_08930C_A	CR_08930C_A	Ca22chrRA_C_albicans_SC5314:1913083-1913587	37Control	37	OK	218.837	380.366	0.797533	1.00221	0.13265	0.405003	no
C1_07120W_A	C1_07120W_A	C1_07120W_A	GAP4	Ca22chr1A_C_albicans_SC5314:1526933-1528757	37Control	37	OK	256.716	445.85	0.796385	0.734551	0.24585	0.581513	no
C1_05890W_A	C1_05890W_A	C1_05890W_A	C1_05890W_A	Ca22chr1A_C_albicans_SC5314:1223688-1224744	37Control	37	OK	1.16837	2.02906	0.796314	0.611325	0.3779	0.728351	no
CR_02630C_A	CR_02630C_A	CR_02630C_A	CR_02630C_A	Ca22chrRA_C_albicans_SC5314:585247-586093	37Control	37	OK	9.21013	15.9913	0.795995	0.799842	0.2506	0.588095	no
CR_00480W_A	CR_00480W_A	CR_00480W_A	MRPL6	Ca22chrRA_C_albicans_SC5314:118386-119088	37Control	37	OK	119.191	206.81	0.795034	1.02236	0.1403	0.418589	no
C2_05170W_A	C2_05170W_A	C2_05170W_A	C2_05170W_A	Ca22chr2A_C_albicans_SC5314:1067411-1068083	37Control	37	OK	79.7625	138.268	0.793679	1.006	0.14735	0.431489	no
CR_02540W_A	CR_02540W_A	CR_02540W_A	CHO2	Ca22chrRA_C_albicans_SC5314:566050-568717	37Control	37	OK	19.3401	33.5141	0.793173	0.999462	0.13845	0.41554	no
C1_01330C_A	C1_01330C_A	C1_01330C_A	DUT1	Ca22chr1A_C_albicans_SC5314:261358-261838	37Control	37	OK	192.198	332.579	0.791101	0.913075	0.19095	0.50562	no
C1_09620C_A	C1_09620C_A	C1_09620C_A	C1_09620C_A	Ca22chr1A_C_albicans_SC5314:2118744-2119209	37Control	37	OK	115.321	199.549	0.791088	1.00548	0.15325	0.442582	no
CR_06340C_A	CR_06340C_A	CR_06340C_A	PGI1	Ca22chrRA_C_albicans_SC5314:1343150-1344803	37Control	37	OK	752.557	1302.14	0.791006	0.488988	0.49975	0.824815	no
C1_04240C_A	C1_04240C_A	C1_04240C_A	HHF1	Ca22chr1A_C_albicans_SC5314:880939-881257	37Control	37	OK	1793.7	3102.3	0.790403	0.6731	0.31215	0.661269	no
C6_02150C_A	C6_02150C_A	C6_02150C_A	C6_02150C_A	Ca22chr6A_C_albicans_SC5314:447638-449000	37Control	37	OK	11.7131	20.2392	0.789028	0.930389	0.18915	0.502559	no
C2_02170W_A	C2_02170W_A	C2_02170W_A	C2_02170W_A	Ca22chr2A_C_albicans_SC5314:424992-426369	37Control	37	OK	64.1215	110.787	0.788904	0.938758	0.18835	0.501344	no
C1_04600C_A	C1_04600C_A	C1_04600C_A	C1_04600C_A	Ca22chr1A_C_albicans_SC5314:947536-948574	37Control	37	OK	135.54	233.943	0.787442	0.934995	0.18055	0.489585	no
CR_05150W_A	CR_05150W_A	CR_05150W_A	CR_05150W_A	Ca22chrRA_C_albicans_SC5314:1115353-1115629	37Control	37	OK	471.526	813.832	0.787393	1.03388	0.12525	0.393837	no
C2_00440W_A	C2_00440W_A	C2_00440W_A	SAS2	Ca22chr2A_C_albicans_SC5314:65220-66279	37Control	37	OK	27.5162	47.4819	0.787094	1.0093	0.1491	0.434788	no
C6_01460C_A	C6_01460C_A	C6_01460C_A	C6_01460C_A	Ca22chr6A_C_albicans_SC5314:292745-293900	37Control	37	OK	51.0189	88.0241	0.786868	1.00507	0.1533	0.442582	no
C4_01940W_A	C4_01940W_A	C4_01940W_A	PHO89	Ca22chr4A_C_albicans_SC5314:379678-381481	37Control	37	OK	1.83689	3.16919	0.786844	0.690522	0.3285	0.677866	no
C1_00480C_A	C1_00480C_A	C1_00480C_A	GCN20	Ca22chr1A_C_albicans_SC5314:75572-77828	37Control	37	OK	37.517	64.706	0.786355	0.985933	0.1389	0.416457	no
CR_03280W_A	CR_03280W_A	CR_03280W_A	IFR2	Ca22chrRA_C_albicans_SC5314:737210-738287	37Control	37	OK	89.5695	154.447	0.78603	0.801533	0.23455	0.567761	no
C2_09170W_A	C2_09170W_A	C2_09170W_A	SLP2	Ca22chr2A_C_albicans_SC5314:1883669-1884461	37Control	37	OK	61.9567	106.768	0.78514	1.02513	0.12805	0.397424	no
CR_10850C_A	CR_10850C_A	CR_10850C_A	ATP16	Ca22chrRA_C_albicans_SC5314:2284742-2285228	37Control	37	OK	1394.45	2402.99	0.785135	0.717541	0.25735	0.59577	no
C6_03380W_A	C6_03380W_A	C6_03380W_A	C6_03380W_A	Ca22chr6A_C_albicans_SC5314:712163-713270	37Control	37	OK	165.695	285.511	0.785013	0.841591	0.24675	0.582471	no
C3_02810C_A	C3_02810C_A	C3_02810C_A	FAA21	Ca22chr3A_C_albicans_SC5314:605100-607257	37Control	37	OK	33.3266	57.3779	0.783823	0.984805	0.1338	0.406668	no
C4_01740W_A	C4_01740W_A	C4_01740W_A	TIM12	Ca22chr4A_C_albicans_SC5314:345375-345705	37Control	37	OK	131.074	225.651	0.78371	0.956302	0.1637	0.461156	no
C5_02800C_A	C5_02800C_A	C5_02800C_A	C5_02800C_A	Ca22chr5A_C_albicans_SC5314:628353-629076	37Control	37	OK	4.91911	8.46699	0.783453	0.69173	0.29945	0.646509	no
C2_01530C_A	C2_01530C_A	C2_01530C_A	C2_01530C_A	Ca22chr2A_C_albicans_SC5314:272822-274967	37Control	37	OK	53.6032	92.2509	0.783243	0.870797	0.2114	0.536909	no
C1_14330W_A	C1_14330W_A	C1_14330W_A	C1_14330W_A	Ca22chr1A_C_albicans_SC5314:3157022-3158294	37Control	37	OK	30.4965	52.472	0.782905	0.994151	0.14105	0.419829	no
C5_01050C_A	C5_01050C_A	C5_01050C_A	C5_01050C_A	Ca22chr5A_C_albicans_SC5314:223926-224533	37Control	37	OK	248.745	427.853	0.782447	0.923452	0.2049	0.52822	no
CR_07390C_A	CR_07390C_A	CR_07390C_A	MRPL8	Ca22chrRA_C_albicans_SC5314:1604877-1605645	37Control	37	OK	170.838	293.733	0.781879	0.940011	0.1894	0.502868	no
CR_01590C_A	CR_01590C_A	CR_01590C_A	TRP2	Ca22chrRA_C_albicans_SC5314:361873-363512	37Control	37	OK	63.192	108.618	0.781446	0.925054	0.191	0.50562	no
CR_03550W_A	CR_03550W_A	CR_03550W_A	NCS2	Ca22chrRA_C_albicans_SC5314:787653-789012	37Control	37	OK	61.3955	105.528	0.781428	0.955766	0.16885	0.469485	no
C1_00120C_A	C1_00120C_A	C1_00120C_A	TRP1	Ca22chr1A_C_albicans_SC5314:17337-21714	37Control	37	OK	75.7614	130.219	0.781403	0.344794	0.7078	0.925985	no
C1_03710C_A	C1_03710C_A	C1_03710C_A	MSB1	Ca22chr1A_C_albicans_SC5314:767066-770930	37Control	37	OK	6.2342	10.7153	0.781396	0.975648	0.17145	0.474194	no
C3_06980W_A	C3_06980W_A	C3_06980W_A	HUT1	Ca22chr3A_C_albicans_SC5314:1597908-1599021	37Control	37	OK	20.452	35.1485	0.781216	0.984885	0.1426	0.422839	no
C4_01460C_A	C4_01460C_A	C4_01460C_A	C4_01460C_A	Ca22chr4A_C_albicans_SC5314:307182-307857	37Control	37	OK	72.8608	125.19	0.780906	0.997173	0.1503	0.437205	no
CR_09660W_A	CR_09660W_A	CR_09660W_A	CR_09660W_A	Ca22chrRA_C_albicans_SC5314:2052940-2054116	37Control	37	OK	18.8806	32.4331	0.780561	0.963225	0.16955	0.470597	no
C2_00690W_A	C2_00690W_A	C2_00690W_A	C2_00690W_A	Ca22chr2A_C_albicans_SC5314:115250-116162	37Control	37	OK	22.974	39.4374	0.779563	0.953912	0.1576	0.449961	no
CR_07940W_A	CR_07940W_A	CR_07940W_A	CR_07940W_A	Ca22chrRA_C_albicans_SC5314:1734389-1736519	37Control	37	OK	9.67345	16.5971	0.778826	0.956618	0.1658	0.464916	no
C1_00450C_A	C1_00450C_A	C1_00450C_A	C1_00450C_A	Ca22chr1A_C_albicans_SC5314:72740-73283	37Control	37	OK	261.395	447.469	0.775559	0.978425	0.14215	0.421903	no
C3_05440C_A	C3_05440C_A	C3_05440C_A	C3_05440C_A	Ca22chr3A_C_albicans_SC5314:1209705-1210995	37Control	37	OK	13.7009	23.452	0.775443	0.903818	0.1878	0.500525	no
C1_13540W_A	C1_13540W_A	C1_13540W_A	GUP1	Ca22chr1A_C_albicans_SC5314:2966484-2968239	37Control	37	OK	14.6993	25.1578	0.775261	0.995726	0.15135	0.439106	no
C3_02530W_A	C3_02530W_A	C3_02530W_A	C3_02530W_A	Ca22chr3A_C_albicans_SC5314:551543-551732	37Control	37	OK	508.58	869.911	0.774394	0.911254	0.18585	0.49744	no
C1_07570C_A	C1_07570C_A	C1_07570C_A	C1_07570C_A	Ca22chr1A_C_albicans_SC5314:1637845-1639054	37Control	37	OK	14.0541	24.0215	0.773339	0.919399	0.1969	0.515658	no
C1_06560W_A	C1_06560W_A	C1_06560W_A	C1_06560W_A	Ca22chr1A_C_albicans_SC5314:1404815-1406129	37Control	37	OK	23.5472	40.239	0.773036	0.989646	0.15345	0.442761	no
CR_02680W_A	CR_02680W_A	CR_02680W_A	CR_02680W_A	Ca22chrRA_C_albicans_SC5314:615878-618245	37Control	37	OK	3.70759	6.33541	0.772956	0.826179	0.24145	0.575295	no
C4_05790W_A	C4_05790W_A	C4_05790W_A	C4_05790W_A	Ca22chr4A_C_albicans_SC5314:1282525-1286320	37Control	37	OK	5.78094	9.8744	0.772389	0.917507	0.1972	0.516156	no
C7_02690C_A	C7_02690C_A	C7_02690C_A	C7_02690C_A	Ca22chr7A_C_albicans_SC5314:571897-573106	37Control	37	OK	41.2444	70.4455	0.772309	1.01302	0.1285	0.398337	no
C2_04510W_A	C2_04510W_A	C2_04510W_A	RIM2	Ca22chr2A_C_albicans_SC5314:946907-948107	37Control	37	OK	65.6345	111.949	0.770312	0.928434	0.16695	0.466543	no
C1_00470C_A	C1_00470C_A	C1_00470C_A	C1_00470C_A	Ca22chr1A_C_albicans_SC5314:74055-75381	37Control	37	OK	42.6493	72.7338	0.770104	0.975684	0.15855	0.451715	no
C6_01710C_A	C6_01710C_A	C6_01710C_A	PTK2	Ca22chr6A_C_albicans_SC5314:358105-360544	37Control	37	OK	35.3875	60.349	0.770091	0.866575	0.21585	0.543739	no
C1_00970W_A	C1_00970W_A	C1_00970W_A	C1_00970W_A	Ca22chr1A_C_albicans_SC5314:198220-198746	37Control	37	OK	24.8175	42.3211	0.77002	0.820553	0.2363	0.569383	no
CR_01700C_A	CR_01700C_A	CR_01700C_A	CR_01700C_A	Ca22chrRA_C_albicans_SC5314:387842-390590	37Control	37	OK	11.6766	19.9103	0.769892	0.976732	0.15505	0.445721	no
CR_02430C_A	CR_02430C_A	CR_02430C_A	CR_02430C_A	Ca22chrRA_C_albicans_SC5314:539687-542237	37Control	37	OK	20.7623	35.3999	0.769783	0.963728	0.17645	0.482143	no
C6_02220W_A	C6_02220W_A	C6_02220W_A	SAR1	Ca22chr6A_C_albicans_SC5314:461383-462114	37Control	37	OK	384.066	654.674	0.769423	0.777202	0.25305	0.591103	no
CR_04120C_A	CR_04120C_A	CR_04120C_A	CR_04120C_A	Ca22chrRA_C_albicans_SC5314:923583-926355	37Control	37	OK	9.55674	16.2875	0.769171	0.959563	0.1762	0.48174	no
C6_04350C_A	C6_04350C_A	C6_04350C_A	FLO8	Ca22chr6A_C_albicans_SC5314:959559-961938	37Control	37	OK	36.6351	62.3937	0.768175	0.868455	0.22675	0.556896	no
C7_01460C_A	C7_01460C_A	C7_01460C_A	C7_01460C_A	Ca22chr7A_C_albicans_SC5314:305827-308848	37Control	37	OK	3.50514	5.96364	0.766722	0.88062	0.18585	0.49744	no
C1_08980C_A	C1_08980C_A	C1_08980C_A	ZWF1	Ca22chr1A_C_albicans_SC5314:1953259-1954783	37Control	37	OK	127.361	216.504	0.765466	0.664809	0.32615	0.675133	no
CR_06840W_A	CR_06840W_A	CR_06840W_A	CR_06840W_A	Ca22chrRA_C_albicans_SC5314:1464904-1467055	37Control	37	OK	26.1149	44.3465	0.76395	0.982069	0.16145	0.457486	no
C6_01680C_A	C6_01680C_A	C6_01680C_A	C6_01680C_A	Ca22chr6A_C_albicans_SC5314:352701-353787	37Control	37	OK	2.61065	4.42593	0.761574	0.684288	0.33515	0.684658	no
C1_04640W_A	C1_04640W_A	C1_04640W_A	C1_04640W_A	Ca22chr1A_C_albicans_SC5314:958784-960746	37Control	37	OK	20.567	34.8156	0.759405	0.989089	0.12995	0.400876	no
C6_00570C_A	C6_00570C_A	C6_00570C_A	NHX1	Ca22chr6A_C_albicans_SC5314:103937-105929	37Control	37	OK	26.6816	45.1522	0.758952	0.994118	0.13225	0.404524	no
CR_08010W_A	CR_08010W_A	CR_08010W_A	DAD4	Ca22chrRA_C_albicans_SC5314:1751962-1752281	37Control	37	OK	351.272	594.275	0.758542	0.924934	0.17655	0.48221	no
C1_13280C_A	C1_13280C_A	C1_13280C_A	C1_13280C_A	Ca22chr1A_C_albicans_SC5314:2895364-2895955	37Control	37	OK	88.5917	149.868	0.758449	0.986597	0.13455	0.408157	no
C3_00340W_A	C3_00340W_A	C3_00340W_A	C3_00340W_A	Ca22chr3A_C_albicans_SC5314:48421-48775	37Control	37	OK	217.649	368.149	0.758287	0.989856	0.1324	0.404567	no
C5_02990W_A	C5_02990W_A	C5_02990W_A	C5_02990W_A	Ca22chr5A_C_albicans_SC5314:660365-660920	37Control	37	OK	41.1141	69.5102	0.75759	0.891519	0.20845	0.531999	no
C2_06200C_A	C2_06200C_A	C2_06200C_A	C2_06200C_A	Ca22chr2A_C_albicans_SC5314:1264659-1266624	37Control	37	OK	18.9246	31.9839	0.757082	0.954443	0.15145	0.439193	no
C3_02390W_A	C3_02390W_A	C3_02390W_A	C3_02390W_A	Ca22chr3A_C_albicans_SC5314:524125-525751	37Control	37	OK	6.10519	10.3164	0.756837	0.798318	0.26725	0.60815	no
C2_07980W_A	C2_07980W_A	C2_07980W_A	C2_07980W_A	Ca22chr2A_C_albicans_SC5314:1620413-1621292	37Control	37	OK	30.4398	51.4305	0.756664	0.893484	0.1962	0.5146	no
C4_07230C_A	C4_07230C_A	C4_07230C_A	VID21	Ca22chr4A_C_albicans_SC5314:1594316-1596377	37Control	37	OK	11.5259	19.465	0.756	0.939027	0.1822	0.491794	no
C5_01180W_A	C5_01180W_A	C5_01180W_A	PUS4	Ca22chr5A_C_albicans_SC5314:266958-268119	37Control	37	OK	51.9886	87.7876	0.755821	0.970478	0.1683	0.468855	no
C7_04240C_A	C7_04240C_A	C7_04240C_A	C7_04240C_A	Ca22chr7A_C_albicans_SC5314:924628-926377	37Control	37	OK	36.9625	62.3353	0.753989	0.872965	0.20665	0.530103	no
C2_05800C_A	C2_05800C_A	C2_05800C_A	C2_05800C_A	Ca22chr2A_C_albicans_SC5314:1185716-1187078	37Control	37	OK	40.4387	68.1755	0.753519	0.986137	0.1369	0.41276	no
CR_06810W_A	CR_06810W_A	CR_06810W_A	HHT2	Ca22chrRA_C_albicans_SC5314:1462249-1462660	37Control	37	OK	1108.58	1868.05	0.752817	0.638373	0.35205	0.702943	no
C3_07500W_A	C3_07500W_A	C3_07500W_A	VAN1	Ca22chr3A_C_albicans_SC5314:1713089-1714644	37Control	37	OK	67.7758	114.2	0.752722	0.895633	0.21195	0.537943	no
C1_07000W_A	C1_07000W_A	C1_07000W_A	MEF2	Ca22chr1A_C_albicans_SC5314:1490451-1492731	37Control	37	OK	27.3576	46.0861	0.752388	0.92177	0.1779	0.484772	no
CR_06900C_A	CR_06900C_A	CR_06900C_A	ALG6	Ca22chrRA_C_albicans_SC5314:1475517-1477209	37Control	37	OK	11.4109	19.2223	0.752364	0.924263	0.1751	0.480057	no
C5_00890C_A	C5_00890C_A	C5_00890C_A	GIT2	Ca22chr5A_C_albicans_SC5314:206334-207939	37Control	37	OK	28.5323	48.0504	0.751952	0.905268	0.19255	0.508508	no
C2_05540C_A	C2_05540C_A	C2_05540C_A	C2_05540C_A	Ca22chr2A_C_albicans_SC5314:1127539-1128659	37Control	37	OK	32.2112	54.2328	0.751603	0.953965	0.16665	0.466051	no
C2_01860C_A	C2_01860C_A	C2_01860C_A	C2_01860C_A	Ca22chr2A_C_albicans_SC5314:342784-343582	37Control	37	OK	24.2909	40.8896	0.751319	0.887984	0.2139	0.540997	no
CR_03520C_A	CR_03520C_A	CR_03520C_A	CR_03520C_A	Ca22chrRA_C_albicans_SC5314:782045-783887	37Control	37	OK	38.6442	65.0104	0.750418	0.941875	0.15735	0.449738	no
C4_06600W_A	C4_06600W_A	C4_06600W_A	TOP2	Ca22chr4A_C_albicans_SC5314:1473574-1477960	37Control	37	OK	10.5376	17.7235	0.750116	0.966532	0.1637	0.461156	no
C5_01730W_A	C5_01730W_A	C5_01730W_A	C5_01730W_A	Ca22chr5A_C_albicans_SC5314:390705-393267	37Control	37	OK	6.25679	10.5161	0.749106	0.849877	0.2301	0.5619	no
C4_05360C_A	C4_05360C_A	C4_05360C_A	C4_05360C_A	Ca22chr4A_C_albicans_SC5314:1169088-1170171	37Control	37	OK	11.5649	19.4183	0.747659	0.837564	0.2304	0.562317	no
C6_02460C_A	C6_02460C_A	C6_02460C_A	C6_02460C_A	Ca22chr6A_C_albicans_SC5314:509768-510749	37Control	37	OK	107.379	180.262	0.747376	0.877818	0.21835	0.547037	no
C2_05480C_A	C2_05480C_A	C2_05480C_A	C2_05480C_A	Ca22chr2A_C_albicans_SC5314:1121551-1121806	37Control	37	OK	172.366	289.334	0.747257	0.872076	0.1956	0.51404	no
C2_01570W_A	C2_01570W_A	C2_01570W_A	C2_01570W_A	Ca22chr2A_C_albicans_SC5314:282279-282825	37Control	37	OK	18.9686	31.8377	0.747122	0.757569	0.2922	0.638245	no
C1_12280C_A	C1_12280C_A	C1_12280C_A	C1_12280C_A	Ca22chr1A_C_albicans_SC5314:2679384-2680083	37Control	37	OK	30.527	51.2319	0.746954	0.878046	0.2216	0.550409	no
CR_05310W_A	CR_05310W_A	CR_05310W_A	CR_05310W_A	Ca22chrRA_C_albicans_SC5314:1142602-1143064	37Control	37	OK	104.685	175.672	0.746833	0.892763	0.21575	0.543739	no
C4_01280C_A	C4_01280C_A	C4_01280C_A	C4_01280C_A	Ca22chr4A_C_albicans_SC5314:256996-258274	37Control	37	OK	45.1111	75.6996	0.746804	0.959581	0.1671	0.466755	no
C4_03800C_A	C4_03800C_A	C4_03800C_A	NUP84	Ca22chr4A_C_albicans_SC5314:803671-806206	37Control	37	OK	18.8697	31.6421	0.745778	0.951904	0.1733	0.477208	no
C2_09630C_A	C2_09630C_A	C2_09630C_A	C2_09630C_A	Ca22chr2A_C_albicans_SC5314:1968950-1971660	37Control	37	OK	14.4444	24.2215	0.745776	0.366234	0.3858	0.734885	no
CR_07380C_A	CR_07380C_A	CR_07380C_A	KSR1	Ca22chrRA_C_albicans_SC5314:1603743-1604676	37Control	37	OK	42.2595	70.8149	0.744776	0.948291	0.167	0.466614	no
C1_07630W_A	C1_07630W_A	C1_07630W_A	C1_07630W_A	Ca22chr1A_C_albicans_SC5314:1649646-1650174	37Control	37	OK	271.5	454.742	0.744096	0.881098	0.22	0.54897	no
C1_05430W_A	C1_05430W_A	C1_05430W_A	SPT20	Ca22chr1A_C_albicans_SC5314:1138276-1140532	37Control	37	OK	11.075	18.5417	0.743462	0.924513	0.1891	0.502497	no
C4_05690W_A	C4_05690W_A	C4_05690W_A	SEC23	Ca22chr4A_C_albicans_SC5314:1251903-1254192	37Control	37	OK	67.8868	113.649	0.743382	0.736611	0.2876	0.632821	no
C4_01480C_A	C4_01480C_A	C4_01480C_A	C4_01480C_A	Ca22chr4A_C_albicans_SC5314:308172-309812	37Control	37	OK	5.79895	9.70498	0.742933	0.258767	0.7829	0.951224	no
C7_00250C_A	C7_00250C_A	C7_00250C_A	C7_00250C_A	Ca22chr7A_C_albicans_SC5314:34631-35195	37Control	37	OK	264.177	441.974	0.742455	0.889302	0.21025	0.534854	no
C4_02930W_A	C4_02930W_A	C4_02930W_A	C4_02930W_A	Ca22chr4A_C_albicans_SC5314:605436-605955	37Control	37	OK	128.229	214.398	0.741568	0.840653	0.20265	0.525239	no
C7_01020C_A	C7_01020C_A	C7_01020C_A	C7_01020C_A	Ca22chr7A_C_albicans_SC5314:214244-214766	37Control	37	OK	257.227	430.029	0.741391	0.873496	0.21805	0.546847	no
C1_13680C_A	C1_13680C_A	C1_13680C_A	GCV3	Ca22chr1A_C_albicans_SC5314:3008285-3008819	37Control	37	OK	710.467	1187.24	0.740772	0.694773	0.31545	0.664913	no
C6_04370W_A	C6_04370W_A	C6_04370W_A	C6_04370W_A	Ca22chr6A_C_albicans_SC5314:965837-968477	37Control	37	OK	7.36375	12.3038	0.740595	0.906549	0.19005	0.504168	no
C1_09660W_A	C1_09660W_A	C1_09660W_A	DOA1	Ca22chr1A_C_albicans_SC5314:2126281-2128567	37Control	37	OK	34.6392	57.8501	0.739914	0.84735	0.22065	0.549365	no
CR_08000C_A	CR_08000C_A	CR_08000C_A	CR_08000C_A	Ca22chrRA_C_albicans_SC5314:1749561-1751244	37Control	37	OK	65.4685	109.327	0.739771	0.886428	0.2179	0.546847	no
C1_08100W_A	C1_08100W_A	C1_08100W_A	DRG1	Ca22chr1A_C_albicans_SC5314:1767332-1768439	37Control	37	OK	153.215	255.851	0.739743	0.85207	0.191	0.50562	no
C2_08610W_A	C2_08610W_A	C2_08610W_A	ERG9	Ca22chr2A_C_albicans_SC5314:1751815-1753162	37Control	37	OK	57.8527	96.6056	0.739722	0.848244	0.21685	0.54531	no
C6_03730C_A	C6_03730C_A	C6_03730C_A	C6_03730C_A	Ca22chr6A_C_albicans_SC5314:807279-808662	37Control	37	OK	91.2286	152.202	0.738429	0.881312	0.20925	0.533319	no
C2_00070C_A	C2_00070C_A	C2_00070C_A	MPP10	Ca22chr2A_C_albicans_SC5314:9359-11063	37Control	37	OK	95.6533	159.504	0.737707	0.807646	0.24605	0.58162	no
C1_01910W_A	C1_01910W_A	C1_01910W_A	C1_01910W_A	Ca22chr1A_C_albicans_SC5314:393295-394360	37Control	37	OK	129.802	216.317	0.736839	0.780711	0.25315	0.591103	no
C1_11790W_A	C1_11790W_A	C1_11790W_A	C1_11790W_A	Ca22chr1A_C_albicans_SC5314:2584052-2584727	37Control	37	OK	41.6654	69.4007	0.736102	0.897922	0.18605	0.497763	no
CR_00350W_A	CR_00350W_A	CR_00350W_A	CR_00350W_A	Ca22chrRA_C_albicans_SC5314:88057-89263	37Control	37	OK	59.3769	98.7809	0.73433	0.927288	0.1674	0.467246	no
CR_08110W_A	CR_08110W_A	CR_08110W_A	CR_08110W_A	Ca22chrRA_C_albicans_SC5314:1765906-1767181	37Control	37	OK	12.8498	21.3715	0.733944	0.865149	0.21585	0.543739	no
C3_01260C_A	C3_01260C_A	C3_01260C_A	C3_01260C_A	Ca22chr3A_C_albicans_SC5314:269314-271492	37Control	37	OK	7.77189	12.9253	0.733861	0.855606	0.21845	0.547142	no
C7_02770W_A	C7_02770W_A	C7_02770W_A	CHS1	Ca22chr7A_C_albicans_SC5314:593117-596198	37Control	37	OK	18.2251	30.3	0.733389	0.834122	0.2152	0.542827	no
C4_05570C_A	C4_05570C_A	C4_05570C_A	TUB4	Ca22chr4A_C_albicans_SC5314:1215385-1216962	37Control	37	OK	10.3946	17.2759	0.73292	0.861234	0.22445	0.554065	no
C3_05990C_A	C3_05990C_A	C3_05990C_A	C3_05990C_A	Ca22chr3A_C_albicans_SC5314:1349837-1352354	37Control	37	OK	2.33382	3.87818	0.732685	0.728527	0.293	0.639325	no
C2_10190C_A	C2_10190C_A	C2_10190C_A	OCA1	Ca22chr2A_C_albicans_SC5314:2094545-2095355	37Control	37	OK	42.9848	71.4145	0.73239	0.936149	0.17885	0.486446	no
C7_02380C_A	C7_02380C_A	C7_02380C_A	CYP1	Ca22chr7A_C_albicans_SC5314:519129-519618	37Control	37	OK	2641.7	4387.14	0.731812	0.455844	0.47315	0.80708	no
C4_01160W_A	C4_01160W_A	C4_01160W_A	CRD2	Ca22chr4A_C_albicans_SC5314:233629-233860	37Control	37	OK	1660.18	2752.94	0.729636	0.862072	0.2089	0.532787	no
C3_05540C_A	C3_05540C_A	C3_05540C_A	C3_05540C_A	Ca22chr3A_C_albicans_SC5314:1240040-1241769	37Control	37	OK	89.6549	148.568	0.728671	0.272362	0.622	0.887797	no
C6_02910W_A	C6_02910W_A	C6_02910W_A	POP4	Ca22chr6A_C_albicans_SC5314:601320-602160	37Control	37	OK	49.2126	81.5117	0.727978	0.921912	0.1818	0.491207	no
C3_07440W_A	C3_07440W_A	C3_07440W_A	TPI1	Ca22chr3A_C_albicans_SC5314:1701962-1702709	37Control	37	OK	3640.16	6029.07	0.727933	0.434783	0.5377	0.846969	no
C4_03410W_A	C4_03410W_A	C4_03410W_A	C4_03410W_A	Ca22chr4A_C_albicans_SC5314:712319-713195	37Control	37	OK	165.191	273.545	0.727648	0.859542	0.20895	0.532842	no
C4_02550C_A	C4_02550C_A	C4_02550C_A	EMP70	Ca22chr4A_C_albicans_SC5314:527398-529291	37Control	37	OK	40.0044	66.244	0.727631	0.926891	0.1727	0.476113	no
CR_09640C_A	CR_09640C_A	CR_09640C_A	CR_09640C_A	Ca22chrRA_C_albicans_SC5314:2049604-2049799	37Control	37	OK	2708.48	4484.62	0.727504	0.89874	0.2019	0.523728	no
C3_01660W_A	C3_01660W_A	C3_01660W_A	C3_01660W_A	Ca22chr3A_C_albicans_SC5314:360107-360458	37Control	37	OK	123.295	204.143	0.727468	0.89089	0.20455	0.527679	no
C3_06590W_A	C3_06590W_A	C3_06590W_A	LYS9	Ca22chr3A_C_albicans_SC5314:1504005-1505340	37Control	37	OK	215.881	357.401	0.727307	0.611954	0.3883	0.736741	no
C4_00620C_A	C4_00620C_A	C4_00620C_A	SPC2	Ca22chr4A_C_albicans_SC5314:108409-108919	37Control	37	OK	99.6023	164.866	0.727042	0.888223	0.2015	0.523194	no
C3_03300C_A	C3_03300C_A	C3_03300C_A	C3_03300C_A	Ca22chr3A_C_albicans_SC5314:696905-698273	37Control	37	OK	19.7535	32.6939	0.726916	0.931459	0.1776	0.484165	no
C5_00430W_A	C5_00430W_A	C5_00430W_A	MET14	Ca22chr5A_C_albicans_SC5314:78889-79492	37Control	37	OK	289.652	478.315	0.723639	0.814969	0.2517	0.589575	no
C2_10200W_A	C2_10200W_A	C2_10200W_A	C2_10200W_A	Ca22chr2A_C_albicans_SC5314:2095698-2096214	37Control	37	OK	85.7143	141.387	0.722045	0.857294	0.2234	0.55285	no
C1_08750W_A	C1_08750W_A	C1_08750W_A	YMC2	Ca22chr1A_C_albicans_SC5314:1907473-1908382	37Control	37	OK	51.061	84.2182	0.721911	0.918161	0.1878	0.500525	no
C3_07670W_A	C3_07670W_A	C3_07670W_A	C3_07670W_A	Ca22chr3A_C_albicans_SC5314:1748232-1748973	37Control	37	OK	97.1483	160.149	0.721153	0.902575	0.2111	0.536292	no
C3_03670W_A	C3_03670W_A	C3_03670W_A	C3_03670W_A	Ca22chr3A_C_albicans_SC5314:774526-776536	37Control	37	OK	22.4615	37.0101	0.720466	0.900674	0.17255	0.475978	no
CR_04020C_A	CR_04020C_A	CR_04020C_A	CR_04020C_A	Ca22chrRA_C_albicans_SC5314:905752-906449	37Control	37	OK	60.2228	99.1418	0.719184	0.921463	0.1809	0.490111	no
C6_01760W_A	C6_01760W_A	C6_01760W_A	SEC12	Ca22chr6A_C_albicans_SC5314:369849-372375	37Control	37	OK	34.1025	56.1267	0.71881	0.8119	0.2498	0.586876	no
C1_02660C_A	C1_02660C_A	C1_02660C_A	MGM101	Ca22chr1A_C_albicans_SC5314:554576-555404	37Control	37	OK	68.9622	113.493	0.718726	0.920118	0.18395	0.494604	no
C1_04610W_A	C1_04610W_A	C1_04610W_A	ATP1	Ca22chr1A_C_albicans_SC5314:949328-951471	37Control	37	OK	838.947	1379.9	0.717908	0.579959	0.388	0.736469	no
C5_04610W_A	C5_04610W_A	C5_04610W_A	C5_04610W_A	Ca22chr5A_C_albicans_SC5314:1002085-1003516	37Control	37	OK	49.3054	81.0854	0.717698	0.909322	0.17275	0.476181	no
C1_11880W_A	C1_11880W_A	C1_11880W_A	C1_11880W_A	Ca22chr1A_C_albicans_SC5314:2602120-2602543	37Control	37	OK	285.118	468.71	0.717134	0.915924	0.18065	0.489715	no
CR_09510C_A	CR_09510C_A	CR_09510C_A	CR_09510C_A	Ca22chrRA_C_albicans_SC5314:2027818-2028619	37Control	37	OK	148.898	244.581	0.715987	0.850511	0.23745	0.570165	no
C2_07040W_A	C2_07040W_A	C2_07040W_A	C2_07040W_A	Ca22chr2A_C_albicans_SC5314:1441144-1442233	37Control	37	OK	37.8903	62.2166	0.715469	0.931499	0.1581	0.450706	no
C7_02920W_A	C7_02920W_A	C7_02920W_A	C7_02920W_A	Ca22chr7A_C_albicans_SC5314:633411-635133	37Control	37	OK	4.52173	7.42246	0.715024	0.659638	0.34335	0.693512	no
C2_04980C_A	C2_04980C_A	C2_04980C_A	CKA2	Ca22chr2A_C_albicans_SC5314:1038613-1039603	37Control	37	OK	55.8106	91.6055	0.714895	0.936352	0.157	0.449475	no
C3_00470W_A	C3_00470W_A	C3_00470W_A	C3_00470W_A	Ca22chr3A_C_albicans_SC5314:66462-67896	37Control	37	OK	53.2684	87.4079	0.714482	0.912777	0.18	0.488516	no
C2_07930C_A	C2_07930C_A	C2_07930C_A	VRP1	Ca22chr2A_C_albicans_SC5314:1613186-1615181	37Control	37	OK	7.96956	13.0737	0.714099	0.799753	0.26825	0.609541	no
C2_07030C_A	C2_07030C_A	C2_07030C_A	C2_07030C_A	Ca22chr2A_C_albicans_SC5314:1440116-1440932	37Control	37	OK	108.674	178.245	0.713856	0.910882	0.1778	0.48457	no
C1_06690W_A	C1_06690W_A	C1_06690W_A	CYK3	Ca22chr1A_C_albicans_SC5314:1431950-1432876	37Control	37	OK	9.06496	14.865	0.713544	0.74591	0.26225	0.601495	no
C1_04030W_A	C1_04030W_A	C1_04030W_A	C1_04030W_A	Ca22chr1A_C_albicans_SC5314:846648-848745	37Control	37	OK	14.3644	23.5495	0.713201	0.890792	0.2122	0.538288	no
C2_09140C_A	C2_09140C_A	C2_09140C_A	MET10	Ca22chr2A_C_albicans_SC5314:1872611-1875896	37Control	37	OK	74.5443	122.199	0.713058	0.717715	0.29565	0.642947	no
C3_06250W_A	C3_06250W_A	C3_06250W_A	ERV25	Ca22chr3A_C_albicans_SC5314:1425216-1427921	37Control	37	OK	250.439	410.409	0.712602	0.61512	0.39785	0.746365	no
C4_01670C_A	C4_01670C_A	C4_01670C_A	C4_01670C_A	Ca22chr4A_C_albicans_SC5314:332862-334044	37Control	37	OK	18.3569	30.0824	0.712595	0.87377	0.21365	0.540801	no
C1_02920W_A	C1_02920W_A	C1_02920W_A	CDC73	Ca22chr1A_C_albicans_SC5314:611933-613046	37Control	37	OK	69.2128	113.336	0.711502	0.911946	0.18715	0.499641	no
C4_01090C_A	C4_01090C_A	C4_01090C_A	C4_01090C_A	Ca22chr4A_C_albicans_SC5314:222372-223518	37Control	37	OK	13.1422	21.5205	0.711501	0.838238	0.2238	0.553164	no
C3_04180W_A	C3_04180W_A	C3_04180W_A	KRE9	Ca22chr3A_C_albicans_SC5314:870555-871371	37Control	37	OK	215.779	353.206	0.710954	0.823065	0.2159	0.543792	no
C3_02200W_A	C3_02200W_A	C3_02200W_A	C3_02200W_A	Ca22chr3A_C_albicans_SC5314:474568-474745	37Control	37	OK	106.35	173.969	0.710017	0.622797	0.36655	0.716625	no
C3_06890W_A	C3_06890W_A	C3_06890W_A	PMT2	Ca22chr3A_C_albicans_SC5314:1577289-1579599	37Control	37	OK	67.0979	109.7	0.709225	0.694067	0.3298	0.679106	no
C4_02250C_A	C4_02250C_A	C4_02250C_A	BGL2	Ca22chr4A_C_albicans_SC5314:444628-445555	37Control	37	OK	477.895	781.172	0.708946	0.684682	0.32415	0.673138	no
C1_12130C_A	C1_12130C_A	C1_12130C_A	ZCF30	Ca22chr1A_C_albicans_SC5314:2650823-2653223	37Control	37	OK	14.8506	24.2731	0.708839	0.832339	0.2368	0.569475	no
C1_02970W_A	C1_02970W_A	C1_02970W_A	C1_02970W_A	Ca22chr1A_C_albicans_SC5314:618378-619644	37Control	37	OK	112.889	184.469	0.708468	0.692265	0.32975	0.679077	no
CR_02000C_A	CR_02000C_A	CR_02000C_A	HEM1	Ca22chrRA_C_albicans_SC5314:436060-437755	37Control	37	OK	90.8771	148.485	0.708329	0.751299	0.27915	0.622518	no
C4_05880W_A	C4_05880W_A	C4_05880W_A	GAT1	Ca22chr4A_C_albicans_SC5314:1301848-1303915	37Control	37	OK	12.7997	20.8873	0.706514	0.904416	0.1905	0.504722	no
C1_01950C_A	C1_01950C_A	C1_01950C_A	C1_01950C_A	Ca22chr1A_C_albicans_SC5314:403143-403689	37Control	37	OK	114.542	186.892	0.706333	0.923084	0.1635	0.461006	no
C2_08270C_A	C2_08270C_A	C2_08270C_A	C2_08270C_A	Ca22chr2A_C_albicans_SC5314:1671419-1672556	37Control	37	OK	35.9076	58.5845	0.706229	0.897581	0.1954	0.51373	no
C3_07890W_A	C3_07890W_A	C3_07890W_A	TIM8	Ca22chr3A_C_albicans_SC5314:1781079-1784314	37Control	37	OK	537.856	877.247	0.705764	0.569278	0.4059	0.754292	no
C6_01160W_A	C6_01160W_A	C6_01160W_A	RCN1	Ca22chr6A_C_albicans_SC5314:226944-227577	37Control	37	OK	19.7499	32.1922	0.704868	0.747874	0.28645	0.631471	no
C6_03700W_A	C6_03700W_A	C6_03700W_A	ALS1	Ca22chr6A_C_albicans_SC5314:791290-795073	37Control	37	OK	19.4617	31.7158	0.704562	0.734874	0.2739	0.616283	no
C3_06910C_A	C3_06910C_A	C3_06910C_A	TPD3	Ca22chr3A_C_albicans_SC5314:1580821-1582753	37Control	37	OK	46.6343	75.9485	0.70363	0.79228	0.24965	0.586597	no
C2_02270C_A	C2_02270C_A	C2_02270C_A	C2_02270C_A	Ca22chr2A_C_albicans_SC5314:456426-456894	37Control	37	OK	212.122	345.355	0.703186	0.903589	0.19615	0.5146	no
C3_05860C_A	C3_05860C_A	C3_05860C_A	C3_05860C_A	Ca22chr3A_C_albicans_SC5314:1313894-1314956	37Control	37	OK	33.1905	54.0204	0.702731	0.901189	0.197	0.515776	no
C6_01910W_A	C6_01910W_A	C6_01910W_A	ADK1	Ca22chr6A_C_albicans_SC5314:393706-394456	37Control	37	OK	487.212	792.876	0.702546	0.676181	0.34835	0.698766	no
C3_07880C_A	C3_07880C_A	C3_07880C_A	C3_07880C_A	Ca22chr3A_C_albicans_SC5314:1780558-1781017	37Control	37	OK	29.0488	47.2553	0.702	0.71789	0.3218	0.67159	no
C2_04300C_A	C2_04300C_A	C2_04300C_A	C2_04300C_A	Ca22chr2A_C_albicans_SC5314:900913-901672	37Control	37	OK	58.7896	95.6311	0.701918	0.890584	0.1955	0.513921	no
C1_00950C_A	C1_00950C_A	C1_00950C_A	CDC5	Ca22chr1A_C_albicans_SC5314:191443-193405	37Control	37	OK	33.0174	53.7006	0.701711	0.809619	0.23725	0.570048	no
CR_07660C_A	CR_07660C_A	CR_07660C_A	CR_07660C_A	Ca22chrRA_C_albicans_SC5314:1662888-1663806	37Control	37	OK	75.2061	122.259	0.701021	0.898692	0.19675	0.51548	no
C4_00200C_A	C4_00200C_A	C4_00200C_A	MET15	Ca22chr4A_C_albicans_SC5314:29745-31982	37Control	37	OK	358.819	583.269	0.700907	0.589197	0.40855	0.756418	no
C5_00250C_A	C5_00250C_A	C5_00250C_A	C5_00250C_A	Ca22chr5A_C_albicans_SC5314:40890-43190	37Control	37	OK	72.0073	117.007	0.700378	0.664779	0.34625	0.696732	no
C2_00090W_A	C2_00090W_A	C2_00090W_A	C2_00090W_A	Ca22chr2A_C_albicans_SC5314:12626-13253	37Control	37	OK	48.1963	78.311	0.700291	0.878007	0.18505	0.496357	no
C6_01090C_A	C6_01090C_A	C6_01090C_A	C6_01090C_A	Ca22chr6A_C_albicans_SC5314:212991-213913	37Control	37	OK	7.64634	12.4237	0.700253	0.701446	0.31145	0.660678	no
C3_06360C_A	C3_06360C_A	C3_06360C_A	CYP5	Ca22chr3A_C_albicans_SC5314:1454761-1455369	37Control	37	OK	534.527	868.48	0.700229	0.694829	0.30205	0.649516	no
C2_08470C_A	C2_08470C_A	C2_08470C_A	STN1	Ca22chr2A_C_albicans_SC5314:1710325-1712089	37Control	37	OK	3.70396	6.01739	0.70007	0.706479	0.31035	0.659533	no
C2_07610C_A	C2_07610C_A	C2_07610C_A	C2_07610C_A	Ca22chr2A_C_albicans_SC5314:1552099-1554259	37Control	37	OK	26.4783	43.0102	0.699866	0.888857	0.19285	0.508943	no
C1_11350C_A	C1_11350C_A	C1_11350C_A	TOS4	Ca22chr1A_C_albicans_SC5314:2489746-2491225	37Control	37	OK	33.1086	53.7523	0.699122	0.794551	0.2488	0.585622	no
CR_01960C_A	CR_01960C_A	CR_01960C_A	MRS2	Ca22chrRA_C_albicans_SC5314:428525-429932	37Control	37	OK	21.703	35.2281	0.69883	0.897175	0.1954	0.51373	no
CR_01140C_A	CR_01140C_A	CR_01140C_A	ERG27	Ca22chrRA_C_albicans_SC5314:258557-259598	37Control	37	OK	53.2877	86.4719	0.698429	0.849489	0.2231	0.552325	no
C1_08030W_A	C1_08030W_A	C1_08030W_A	PFY1	Ca22chr1A_C_albicans_SC5314:1753562-1753943	37Control	37	OK	934.43	1515.6	0.697733	0.70617	0.32025	0.670212	no
CR_02140W_A	CR_02140W_A	CR_02140W_A	RSR1	Ca22chrRA_C_albicans_SC5314:465452-466273	37Control	37	OK	79.9099	129.587	0.697471	0.913774	0.16755	0.467596	no
C3_01410C_A	C3_01410C_A	C3_01410C_A	ALI1	Ca22chr3A_C_albicans_SC5314:302675-303515	37Control	37	OK	174.892	283.563	0.6972	0.830444	0.23515	0.568848	no
C6_00740W_A	C6_00740W_A	C6_00740W_A	FAT1	Ca22chr6A_C_albicans_SC5314:129789-131742	37Control	37	OK	48.1426	78.0353	0.696812	0.821929	0.25445	0.592786	no
C6_03270C_A	C6_03270C_A	C6_03270C_A	AYR2	Ca22chr6A_C_albicans_SC5314:686773-687667	37Control	37	OK	60.2598	97.648	0.696394	0.837773	0.2028	0.525267	no
C5_04790C_A	C5_04790C_A	C5_04790C_A	C5_04790C_A	Ca22chr5A_C_albicans_SC5314:1036646-1038692	37Control	37	OK	22.7219	36.7978	0.695534	0.395448	0.58435	0.872818	no
C3_03860W_A	C3_03860W_A	C3_03860W_A	C3_03860W_A	Ca22chr3A_C_albicans_SC5314:807801-808329	37Control	37	OK	68.6315	111.12	0.695174	0.869592	0.22265	0.551915	no
C2_06370C_A	C2_06370C_A	C2_06370C_A	SCP1	Ca22chr2A_C_albicans_SC5314:1301183-1301768	37Control	37	OK	45.1515	73.1028	0.695153	0.851072	0.21615	0.544203	no
C1_04980C_A	C1_04980C_A	C1_04980C_A	C1_04980C_A	Ca22chr1A_C_albicans_SC5314:1041963-1043523	37Control	37	OK	49.0584	79.4099	0.69482	0.890985	0.19555	0.51398	no
C6_03580W_A	C6_03580W_A	C6_03580W_A	C6_03580W_A	Ca22chr6A_C_albicans_SC5314:759949-762031	37Control	37	OK	5.21728	8.44334	0.694516	0.772859	0.25775	0.596403	no
C1_10470W_A	C1_10470W_A	C1_10470W_A	C1_10470W_A	Ca22chr1A_C_albicans_SC5314:2318201-2319212	37Control	37	OK	156.234	252.668	0.693531	0.808965	0.23065	0.562586	no
C4_01510W_A	C4_01510W_A	C4_01510W_A	C4_01510W_A	Ca22chr4A_C_albicans_SC5314:314497-315304	37Control	37	OK	133.824	216.294	0.692654	0.814162	0.2564	0.595254	no
C6_03500C_A	C6_03500C_A	C6_03500C_A	SAP4	Ca22chr6A_C_albicans_SC5314:744961-746215	37Control	37	OK	6.87946	11.1186	0.692614	0.647653	0.35945	0.710388	no
C2_01270W_A	C2_01270W_A	C2_01270W_A	CHA1	Ca22chr2A_C_albicans_SC5314:215535-216597	37Control	37	OK	156.05	252.142	0.692226	0.681057	0.3253	0.674189	no
C7_03270W_A	C7_03270W_A	C7_03270W_A	C7_03270W_A	Ca22chr7A_C_albicans_SC5314:710679-711873	37Control	37	OK	94.0374	151.89	0.691716	0.780478	0.26865	0.609862	no
C3_06330W_A	C3_06330W_A	C3_06330W_A	TSA1B	Ca22chr3A_C_albicans_SC5314:1452362-1452953	37Control	37	OK	0.189896	0.306276	0.689625	0.327087	0.67725	0.913688	no
C7_03840W_A	C7_03840W_A	C7_03840W_A	C7_03840W_A	Ca22chr7A_C_albicans_SC5314:848743-849739	37Control	37	OK	47.6225	76.7726	0.688947	0.905809	0.1803	0.489048	no
C6_00500C_A	C6_00500C_A	C6_00500C_A	C6_00500C_A	Ca22chr6A_C_albicans_SC5314:94192-95188	37Control	37	OK	26.0557	41.9974	0.688701	0.854127	0.2308	0.562734	no
C1_03730C_A	C1_03730C_A	C1_03730C_A	MNS1	Ca22chr1A_C_albicans_SC5314:776729-778577	37Control	37	OK	32.6808	52.6389	0.687685	0.882959	0.2005	0.521735	no
C3_05390C_A	C3_05390C_A	C3_05390C_A	GPI1	Ca22chr3A_C_albicans_SC5314:1197249-1199485	37Control	37	OK	4.9545	7.97938	0.687538	0.628039	0.36075	0.711788	no
C3_03290C_A	C3_03290C_A	C3_03290C_A	NPR2	Ca22chr3A_C_albicans_SC5314:694448-696431	37Control	37	OK	6.94806	11.1884	0.687319	0.815654	0.24135	0.575276	no
C5_00180W_A	C5_00180W_A	C5_00180W_A	AFL1	Ca22chr5A_C_albicans_SC5314:21296-23504	37Control	37	OK	41.7352	67.1931	0.687048	0.849516	0.2196	0.548761	no
C6_01340C_A	C6_01340C_A	C6_01340C_A	C6_01340C_A	Ca22chr6A_C_albicans_SC5314:267236-267944	37Control	37	OK	62.8538	101.169	0.686688	0.855775	0.23575	0.569349	no
C1_04790W_A	C1_04790W_A	C1_04790W_A	C1_04790W_A	Ca22chr1A_C_albicans_SC5314:997296-997971	37Control	37	OK	58.1515	93.5905	0.686545	0.851023	0.23335	0.565947	no
C2_04380C_A	C2_04380C_A	C2_04380C_A	C2_04380C_A	Ca22chr2A_C_albicans_SC5314:916039-917584	37Control	37	OK	30.7051	49.3786	0.685408	0.876346	0.20315	0.525884	no
C1_04400C_A	C1_04400C_A	C1_04400C_A	APE2	Ca22chr1A_C_albicans_SC5314:911108-914328	37Control	37	OK	177.194	284.797	0.684601	0.549432	0.41855	0.766121	no
C1_02050C_A	C1_02050C_A	C1_02050C_A	PHO91	Ca22chr1A_C_albicans_SC5314:421263-423846	37Control	37	OK	40.1197	64.4468	0.683796	0.817784	0.25885	0.597627	no
C3_00100W_A	C3_00100W_A	C3_00100W_A	C3_00100W_A	Ca22chr3A_C_albicans_SC5314:16406-19533	37Control	37	OK	48.9699	78.6198	0.682998	0.366792	0.5921	0.877228	no
CR_02890C_A	CR_02890C_A	CR_02890C_A	CR_02890C_A	Ca22chrRA_C_albicans_SC5314:658854-660642	37Control	37	OK	31.7513	50.9678	0.682768	0.881831	0.20345	0.526082	no
C2_03300W_A	C2_03300W_A	C2_03300W_A	HEM2	Ca22chr2A_C_albicans_SC5314:680926-681952	37Control	37	OK	89.0644	142.939	0.682482	0.823542	0.2304	0.562317	no
C6_00880W_A	C6_00880W_A	C6_00880W_A	PEX7	Ca22chr6A_C_albicans_SC5314:172249-173392	37Control	37	OK	34.1218	54.74	0.681901	0.869082	0.20695	0.530383	no
CR_07510W_A	CR_07510W_A	CR_07510W_A	CR_07510W_A	Ca22chrRA_C_albicans_SC5314:1627318-1627769	37Control	37	OK	130.071	208.66	0.68185	0.869856	0.206	0.529622	no
C7_01050W_A	C7_01050W_A	C7_01050W_A	C7_01050W_A	Ca22chr7A_C_albicans_SC5314:221545-222589	37Control	37	OK	6.3717	10.2182	0.681386	0.680895	0.32215	0.6718	no
C6_02170C_A	C6_02170C_A	C6_02170C_A	SWD3	Ca22chr6A_C_albicans_SC5314:451183-452335	37Control	37	OK	21.2984	34.1289	0.680247	0.839511	0.2333	0.565947	no
C7_03600W_A	C7_03600W_A	C7_03600W_A	MNN26	Ca22chr7A_C_albicans_SC5314:800394-802665	37Control	37	OK	31.1373	49.8936	0.68021	0.860851	0.20065	0.521923	no
C2_06950C_A	C2_06950C_A	C2_06950C_A	C2_06950C_A	Ca22chr2A_C_albicans_SC5314:1426286-1427003	37Control	37	OK	69.6973	111.587	0.678991	0.891306	0.18345	0.493823	no
CR_04370W_A	CR_04370W_A	CR_04370W_A	CR_04370W_A	Ca22chrRA_C_albicans_SC5314:969414-970200	37Control	37	OK	48.494	77.6392	0.67898	0.844657	0.2368	0.569475	no
C2_02160W_A	C2_02160W_A	C2_02160W_A	SAM37	Ca22chr2A_C_albicans_SC5314:422848-423919	37Control	37	OK	14.8103	23.7022	0.678423	0.80334	0.25065	0.588139	no
C2_05380W_A	C2_05380W_A	C2_05380W_A	C2_05380W_A	Ca22chr2A_C_albicans_SC5314:1106561-1107680	37Control	37	OK	34.2246	54.7262	0.6772	0.80475	0.2531	0.591103	no
CR_06700C_A	CR_06700C_A	CR_06700C_A	SOL3	Ca22chrRA_C_albicans_SC5314:1440888-1441668	37Control	37	OK	148.434	237.295	0.676861	0.735919	0.2563	0.595168	no
C1_02760W_A	C1_02760W_A	C1_02760W_A	C1_02760W_A	Ca22chr1A_C_albicans_SC5314:579749-580802	37Control	37	OK	190.873	304.611	0.674356	0.713813	0.2919	0.637812	no
C4_06680C_A	C4_06680C_A	C4_06680C_A	C4_06680C_A	Ca22chr4A_C_albicans_SC5314:1490890-1493611	37Control	37	OK	42.4904	67.7977	0.674098	0.7546	0.28125	0.624908	no
C4_00140C_A	C4_00140C_A	C4_00140C_A	HIS4	Ca22chr4A_C_albicans_SC5314:21177-23694	37Control	37	OK	68.0745	108.574	0.67349	0.724422	0.31115	0.660414	no
C5_00630C_A	C5_00630C_A	C5_00630C_A	EXO1	Ca22chr5A_C_albicans_SC5314:142315-144415	37Control	37	OK	17.1136	27.2884	0.673149	0.856613	0.1989	0.519091	no
C3_05330C_A	C3_05330C_A	C3_05330C_A	C3_05330C_A	Ca22chr3A_C_albicans_SC5314:1181871-1182843	37Control	37	OK	2.13827	3.40916	0.672974	0.574201	0.37545	0.725516	no
C1_04510W_A	C1_04510W_A	C1_04510W_A	C1_04510W_A	Ca22chr1A_C_albicans_SC5314:931182-932622	37Control	37	OK	37.2722	59.4159	0.672749	0.820018	0.21555	0.543565	no
CR_01290C_A	CR_01290C_A	CR_01290C_A	CWH43	Ca22chrRA_C_albicans_SC5314:307229-310298	37Control	37	OK	31.1916	49.7141	0.672501	0.803613	0.2568	0.595302	no
C6_02140W_A	C6_02140W_A	C6_02140W_A	C6_02140W_A	Ca22chr6A_C_albicans_SC5314:444602-447512	37Control	37	OK	10.1133	16.117	0.672335	0.833059	0.2365	0.569383	no
C1_10920W_A	C1_10920W_A	C1_10920W_A	C1_10920W_A	Ca22chr1A_C_albicans_SC5314:2412525-2414079	37Control	37	OK	10.7898	17.1871	0.671657	0.794698	0.2725	0.614675	no
C1_10490W_A	C1_10490W_A	C1_10490W_A	LKH1	Ca22chr1A_C_albicans_SC5314:2321498-2323370	37Control	37	OK	79.1037	126	0.671606	0.677445	0.3191	0.669191	no
C5_02410C_A	C5_02410C_A	C5_02410C_A	C5_02410C_A	Ca22chr5A_C_albicans_SC5314:534198-534717	37Control	37	OK	40.6883	64.8036	0.67146	0.764795	0.2802	0.6239	no
C7_02940C_A	C7_02940C_A	C7_02940C_A	IFM1	Ca22chr7A_C_albicans_SC5314:636727-639031	37Control	37	OK	29.962	47.6992	0.670833	0.820912	0.23865	0.57188	no
CR_00490W_A	CR_00490W_A	CR_00490W_A	CR_00490W_A	Ca22chrRA_C_albicans_SC5314:119367-120249	37Control	37	OK	167.116	265.976	0.670448	0.802316	0.2557	0.594215	no
C1_12340C_A	C1_12340C_A	C1_12340C_A	MRPS9	Ca22chr1A_C_albicans_SC5314:2689208-2690219	37Control	37	OK	188.163	299.411	0.670147	0.713039	0.3242	0.673168	no
CR_04140W_A	CR_04140W_A	CR_04140W_A	CR_04140W_A	Ca22chrRA_C_albicans_SC5314:928305-929691	37Control	37	OK	150.643	239.665	0.669882	0.735155	0.3103	0.659501	no
C3_00160C_A	C3_00160C_A	C3_00160C_A	C3_00160C_A	Ca22chr3A_C_albicans_SC5314:21253-22687	37Control	37	OK	38.3424	60.9968	0.669791	0.860222	0.21635	0.544561	no
C1_12780W_A	C1_12780W_A	C1_12780W_A	RBK1	Ca22chr1A_C_albicans_SC5314:2785528-2786701	37Control	37	OK	47.7817	76.0127	0.669783	0.84827	0.20615	0.529646	no
CR_00050W_A	CR_00050W_A	CR_00050W_A	INO2	Ca22chrRA_C_albicans_SC5314:13683-14823	37Control	37	OK	17.4741	27.7915	0.669425	0.723274	0.31235	0.661544	no
CR_08450C_A	CR_08450C_A	CR_08450C_A	CR_08450C_A	Ca22chrRA_C_albicans_SC5314:1823509-1825432	37Control	37	OK	17.9006	28.4695	0.669413	0.87643	0.1866	0.498951	no
C5_00320W_A	C5_00320W_A	C5_00320W_A	C5_00320W_A	Ca22chr5A_C_albicans_SC5314:54028-54322	37Control	37	OK	541.347	860.522	0.668657	0.851887	0.225	0.554914	no
C4_00470C_A	C4_00470C_A	C4_00470C_A	C4_00470C_A	Ca22chr4A_C_albicans_SC5314:78355-80167	37Control	37	OK	31.9977	50.8417	0.668045	0.85011	0.2182	0.546952	no
C1_06790C_A	C1_06790C_A	C1_06790C_A	MRPL19	Ca22chr1A_C_albicans_SC5314:1449872-1450304	37Control	37	OK	312.848	496.924	0.667566	0.849402	0.20995	0.534379	no
C4_05210W_A	C4_05210W_A	C4_05210W_A	C4_05210W_A	Ca22chr4A_C_albicans_SC5314:1128700-1129393	37Control	37	OK	67.7411	107.538	0.666749	0.874128	0.19015	0.504211	no
CR_10810C_A	CR_10810C_A	CR_10810C_A	CR_10810C_A	Ca22chrRA_C_albicans_SC5314:2281328-2282324	37Control	37	OK	55.3239	87.8028	0.666364	0.869477	0.1881	0.501041	no
C7_01880C_A	C7_01880C_A	C7_01880C_A	C7_01880C_A	Ca22chr7A_C_albicans_SC5314:404172-405123	37Control	37	OK	13.6296	21.6249	0.665952	0.748449	0.27875	0.621921	no
C2_09520C_A	C2_09520C_A	C2_09520C_A	CCT2	Ca22chr2A_C_albicans_SC5314:1946178-1947759	37Control	37	OK	140.724	223.096	0.664794	0.717792	0.29995	0.646847	no
CR_03970C_A	CR_03970C_A	CR_03970C_A	SEC22	Ca22chrRA_C_albicans_SC5314:899034-899762	37Control	37	OK	76.9567	121.944	0.664098	0.807282	0.23	0.561874	no
C7_02120C_A	C7_02120C_A	C7_02120C_A	C7_02120C_A	Ca22chr7A_C_albicans_SC5314:467305-467767	37Control	37	OK	204.877	324.538	0.663632	0.850674	0.222	0.550687	no
C6_03650C_A	C6_03650C_A	C6_03650C_A	POP2	Ca22chr6A_C_albicans_SC5314:775109-776588	37Control	37	OK	41.9156	66.387	0.663414	0.850924	0.2211	0.549883	no
C2_03170W_A	C2_03170W_A	C2_03170W_A	C2_03170W_A	Ca22chr2A_C_albicans_SC5314:643404-644115	37Control	37	OK	32.3988	51.3107	0.663318	0.811243	0.2288	0.560032	no
C7_02270W_A	C7_02270W_A	C7_02270W_A	LDG3	Ca22chr7A_C_albicans_SC5314:493960-494419	37Control	37	OK	1.52015	2.40699	0.663017	0.48123	0.50985	0.831392	no
C4_01550C_A	C4_01550C_A	C4_01550C_A	CPA1	Ca22chr4A_C_albicans_SC5314:320142-321435	37Control	37	OK	37.0764	58.702	0.662909	0.806337	0.2432	0.57742	no
C2_09580W_A	C2_09580W_A	C2_09580W_A	AGE2	Ca22chr2A_C_albicans_SC5314:1960674-1961838	37Control	37	OK	37.3505	59.1119	0.66232	0.858347	0.1869	0.499399	no
C2_10830W_A	C2_10830W_A	C2_10830W_A	C2_10830W_A	Ca22chr2A_C_albicans_SC5314:2221163-2221412	37Control	37	OK	563.108	890.514	0.661227	0.844862	0.2149	0.542361	no
C1_14440C_A	C1_14440C_A	C1_14440C_A	GDI1	Ca22chr1A_C_albicans_SC5314:3171638-3172988	37Control	37	OK	116.071	183.514	0.660889	0.734917	0.2819	0.62532	no
C1_09010W_A	C1_09010W_A	C1_09010W_A	NAR1	Ca22chr1A_C_albicans_SC5314:1962464-1964288	37Control	37	OK	41.4541	65.536	0.660773	0.80851	0.2354	0.569087	no
C2_04030C_A	C2_04030C_A	C2_04030C_A	ACP12	Ca22chr2A_C_albicans_SC5314:840689-841022	37Control	37	OK	854.615	1350.15	0.659775	0.785487	0.25865	0.597311	no
C6_02330W_A	C6_02330W_A	C6_02330W_A	C6_02330W_A	Ca22chr6A_C_albicans_SC5314:486451-487012	37Control	37	OK	949.686	1499.88	0.659322	0.630588	0.3619	0.712388	no
C2_06480W_A	C2_06480W_A	C2_06480W_A	C2_06480W_A	Ca22chr2A_C_albicans_SC5314:1318660-1319632	37Control	37	OK	67.9053	107.216	0.65892	0.839912	0.2311	0.563246	no
C1_00810W_A	C1_00810W_A	C1_00810W_A	C1_00810W_A	Ca22chr1A_C_albicans_SC5314:155442-156324	37Control	37	OK	6.00256	9.47737	0.658909	0.576818	0.429	0.775601	no
C5_04140W_A	C5_04140W_A	C5_04140W_A	C5_04140W_A	Ca22chr5A_C_albicans_SC5314:924644-925907	37Control	37	OK	1.02367	1.61502	0.657806	0.461916	0.53695	0.846661	no
C3_06540C_A	C3_06540C_A	C3_06540C_A	C3_06540C_A	Ca22chr3A_C_albicans_SC5314:1492992-1493760	37Control	37	OK	24.0885	37.9988	0.657607	0.775588	0.26345	0.603073	no
C1_00730C_A	C1_00730C_A	C1_00730C_A	CMP1	Ca22chr1A_C_albicans_SC5314:126790-128620	37Control	37	OK	43.5471	68.6672	0.657044	0.807218	0.24165	0.575408	no
C2_08140C_A	C2_08140C_A	C2_08140C_A	PHM7	Ca22chr2A_C_albicans_SC5314:1649318-1652102	37Control	37	OK	72.5136	114.316	0.656697	0.700236	0.30315	0.650396	no
C4_04270W_A	C4_04270W_A	C4_04270W_A	C4_04270W_A	Ca22chr4A_C_albicans_SC5314:913731-914373	37Control	37	OK	22.2249	35.0193	0.655974	0.728575	0.29115	0.637279	no
C4_04980W_A	C4_04980W_A	C4_04980W_A	C4_04980W_A	Ca22chr4A_C_albicans_SC5314:1063813-1065475	37Control	37	OK	8.65928	13.6365	0.655151	0.775239	0.2689	0.610209	no
C4_01390W_A	C4_01390W_A	C4_01390W_A	HAP3	Ca22chr4A_C_albicans_SC5314:287624-288733	37Control	37	OK	6.09059	9.58414	0.654067	0.651577	0.33195	0.68115	no
C1_00640C_A	C1_00640C_A	C1_00640C_A	RPO41	Ca22chr1A_C_albicans_SC5314:107124-111027	37Control	37	OK	35.1005	55.1853	0.652791	0.73044	0.298	0.645039	no
C4_00210W_A	C4_00210W_A	C4_00210W_A	C4_00210W_A	Ca22chr4A_C_albicans_SC5314:32584-33277	37Control	37	OK	28.7083	45.121	0.652333	0.738887	0.3112	0.660445	no
C2_09570C_A	C2_09570C_A	C2_09570C_A	C2_09570C_A	Ca22chr2A_C_albicans_SC5314:1957828-1958539	37Control	37	OK	36.2054	56.9009	0.652248	0.770028	0.26905	0.610402	no
C1_10540C_A	C1_10540C_A	C1_10540C_A	C1_10540C_A	Ca22chr1A_C_albicans_SC5314:2330848-2332411	37Control	37	OK	9.61006	15.1007	0.651993	0.773349	0.2727	0.614979	no
C1_02650W_A	C1_02650W_A	C1_02650W_A	C1_02650W_A	Ca22chr1A_C_albicans_SC5314:553757-554360	37Control	37	OK	379.88	596.875	0.651886	0.698227	0.3386	0.688124	no
C2_09530W_A	C2_09530W_A	C2_09530W_A	EAP1	Ca22chr2A_C_albicans_SC5314:1951209-1953171	37Control	37	OK	14.9861	23.5435	0.651703	0.807671	0.2517	0.589575	no
C6_00560W_A	C6_00560W_A	C6_00560W_A	C6_00560W_A	Ca22chr6A_C_albicans_SC5314:101798-103787	37Control	37	OK	29.4966	46.3074	0.650695	0.829482	0.23155	0.563736	no
C2_10030C_A	C2_10030C_A	C2_10030C_A	MP65	Ca22chr2A_C_albicans_SC5314:2053447-2054584	37Control	37	OK	978.196	1535.48	0.650494	0.518205	0.45465	0.795627	no
C6_00400C_A	C6_00400C_A	C6_00400C_A	C6_00400C_A	Ca22chr6A_C_albicans_SC5314:69030-70365	37Control	37	OK	9.64237	15.1223	0.649219	0.734212	0.28475	0.628606	no
C2_01440C_A	C2_01440C_A	C2_01440C_A	C2_01440C_A	Ca22chr2A_C_albicans_SC5314:257407-257812	37Control	37	OK	365.647	573.375	0.64903	0.807383	0.2587	0.597354	no
C1_06920C_A	C1_06920C_A	C1_06920C_A	C1_06920C_A	Ca22chr1A_C_albicans_SC5314:1473494-1474850	37Control	37	OK	18.8044	29.4779	0.648562	0.806332	0.26035	0.599589	no
C7_01830W_A	C7_01830W_A	C7_01830W_A	C7_01830W_A	Ca22chr7A_C_albicans_SC5314:393002-393695	37Control	37	OK	16.6934	26.1666	0.648451	0.694237	0.32965	0.679049	no
C1_09470C_A	C1_09470C_A	C1_09470C_A	C1_09470C_A	Ca22chr1A_C_albicans_SC5314:2088738-2089725	37Control	37	OK	93.6428	146.743	0.648048	0.825239	0.2191	0.548114	no
C5_00840W_A	C5_00840W_A	C5_00840W_A	C5_00840W_A	Ca22chr5A_C_albicans_SC5314:196710-197904	37Control	37	OK	22.0395	34.5356	0.647995	0.826101	0.228	0.558873	no
C4_06400C_A	C4_06400C_A	C4_06400C_A	VMA8	Ca22chr4A_C_albicans_SC5314:1419738-1420542	37Control	37	OK	106.493	166.795	0.647318	0.738844	0.2858	0.630333	no
CR_07200W_A	CR_07200W_A	CR_07200W_A	CR_07200W_A	Ca22chrRA_C_albicans_SC5314:1569148-1570732	37Control	37	OK	22.9989	36.0149	0.647032	0.819281	0.2307	0.562636	no
C1_11240C_A	C1_11240C_A	C1_11240C_A	CHO1	Ca22chr1A_C_albicans_SC5314:2470407-2471229	37Control	37	OK	107.739	168.704	0.646957	0.737803	0.26815	0.609461	no
C3_00170C_A	C3_00170C_A	C3_00170C_A	C3_00170C_A	Ca22chr3A_C_albicans_SC5314:22744-23092	37Control	37	OK	553.066	866.006	0.646926	0.745811	0.298	0.645039	no
C6_00820W_A	C6_00820W_A	C6_00820W_A	SUN41	Ca22chr6A_C_albicans_SC5314:158272-159529	37Control	37	OK	540.3	845.747	0.646466	0.57593	0.4012	0.749217	no
C7_01440W_A	C7_01440W_A	C7_01440W_A	C7_01440W_A	Ca22chr7A_C_albicans_SC5314:302674-303043	37Control	37	OK	127.146	198.888	0.645467	0.792153	0.2527	0.590595	no
C5_02260C_A	C5_02260C_A	C5_02260C_A	PTH1	Ca22chr5A_C_albicans_SC5314:501452-502862	37Control	37	OK	31.378	49.0467	0.644403	0.826335	0.2363	0.569383	no
C7_03130C_A	C7_03130C_A	C7_03130C_A	DFR1	Ca22chr7A_C_albicans_SC5314:678064-678643	37Control	37	OK	29.1561	45.5529	0.643744	0.748378	0.26895	0.610249	no
C3_01930W_A	C3_01930W_A	C3_01930W_A	PXP2	Ca22chr3A_C_albicans_SC5314:425209-427384	37Control	37	OK	3.32664	5.1971	0.643641	0.66131	0.3478	0.698232	no
C5_05040W_A	C5_05040W_A	C5_05040W_A	C5_05040W_A	Ca22chr5A_C_albicans_SC5314:1104723-1106172	37Control	37	OK	15.5082	24.2254	0.643486	0.765146	0.2723	0.61467	no
C4_02880C_A	C4_02880C_A	C4_02880C_A	C4_02880C_A	Ca22chr4A_C_albicans_SC5314:597478-598246	37Control	37	OK	104.081	162.568	0.643338	0.823988	0.2413	0.575276	no
CR_04260W_A	CR_04260W_A	CR_04260W_A	SNP3	Ca22chrRA_C_albicans_SC5314:953782-954152	37Control	37	OK	288.413	450.469	0.643293	0.823382	0.23595	0.569383	no
C6_03450C_A	C6_03450C_A	C6_03450C_A	NAM2	Ca22chr6A_C_albicans_SC5314:727786-730372	37Control	37	OK	15.8433	24.7362	0.642752	0.842991	0.2036	0.526253	no
C3_05110W_A	C3_05110W_A	C3_05110W_A	C3_05110W_A	Ca22chr3A_C_albicans_SC5314:1097923-1098925	37Control	37	OK	42.422	66.2271	0.64261	0.841556	0.20715	0.53059	no
C4_05560C_A	C4_05560C_A	C4_05560C_A	ARO9	Ca22chr4A_C_albicans_SC5314:1213410-1214982	37Control	37	OK	18.5631	28.9789	0.642567	0.804511	0.26085	0.600048	no
CR_06520C_A	CR_06520C_A	CR_06520C_A	CR_06520C_A	Ca22chrRA_C_albicans_SC5314:1391226-1391886	37Control	37	OK	47.5667	74.2175	0.641808	0.812828	0.2265	0.556718	no
C2_05290C_A	C2_05290C_A	C2_05290C_A	C2_05290C_A	Ca22chr2A_C_albicans_SC5314:1090725-1091367	37Control	37	OK	207.95	324.401	0.64154	0.717631	0.316	0.665477	no
C5_00620W_A	C5_00620W_A	C5_00620W_A	C5_00620W_A	Ca22chr5A_C_albicans_SC5314:141649-142261	37Control	37	OK	21.3608	33.3191	0.641387	0.677819	0.34265	0.692766	no
C4_02140C_A	C4_02140C_A	C4_02140C_A	TIM10	Ca22chr4A_C_albicans_SC5314:423168-423444	37Control	37	OK	1221.04	1903.82	0.640785	0.764308	0.28585	0.630369	no
C6_00860W_A	C6_00860W_A	C6_00860W_A	GPX1	Ca22chr6A_C_albicans_SC5314:169117-169807	37Control	37	OK	15.3023	23.8458	0.639982	0.684737	0.33005	0.679175	no
C3_02280C_A	C3_02280C_A	C3_02280C_A	GFA1	Ca22chr3A_C_albicans_SC5314:493361-495503	37Control	37	OK	104.987	163.58	0.639788	0.615021	0.39155	0.739704	no
CR_03950W_A	CR_03950W_A	CR_03950W_A	CR_03950W_A	Ca22chrRA_C_albicans_SC5314:896165-896951	37Control	37	OK	80.8306	125.743	0.637504	0.834265	0.20735	0.530686	no
C2_06220C_A	C2_06220C_A	C2_06220C_A	MEC3	Ca22chr2A_C_albicans_SC5314:1268217-1269177	37Control	37	OK	20.6106	32.0599	0.63738	0.753105	0.2902	0.636756	no
C1_12120W_A	C1_12120W_A	C1_12120W_A	C1_12120W_A	Ca22chr1A_C_albicans_SC5314:2648543-2650742	37Control	37	OK	11.1411	17.3293	0.637313	0.789922	0.2554	0.593927	no
C1_13130C_A	C1_13130C_A	C1_13130C_A	C1_13130C_A	Ca22chr1A_C_albicans_SC5314:2866541-2868221	37Control	37	OK	103.544	160.997	0.636786	0.61824	0.3881	0.736584	no
C2_08380C_A	C2_08380C_A	C2_08380C_A	C2_08380C_A	Ca22chr2A_C_albicans_SC5314:1692181-1694329	37Control	37	OK	9.18867	14.2782	0.635888	0.784564	0.257	0.595472	no
C5_05230C_A	C5_05230C_A	C5_05230C_A	C5_05230C_A	Ca22chr5A_C_albicans_SC5314:1144904-1146224	37Control	37	OK	516.041	801.652	0.635492	0.567297	0.41605	0.764082	no
C2_09780C_A	C2_09780C_A	C2_09780C_A	C2_09780C_A	Ca22chr2A_C_albicans_SC5314:1998132-1998852	37Control	37	OK	65.7277	102.077	0.635078	0.770281	0.26295	0.602367	no
C2_06120C_A	C2_06120C_A	C2_06120C_A	C2_06120C_A	Ca22chr2A_C_albicans_SC5314:1249803-1250850	37Control	37	OK	14.3088	22.2201	0.634961	0.751557	0.28345	0.627501	no
CR_02110W_A	CR_02110W_A	CR_02110W_A	MCM6	Ca22chrRA_C_albicans_SC5314:459666-462309	37Control	37	OK	26.1648	40.6274	0.634828	0.813888	0.2399	0.573608	no
CR_04530W_A	CR_04530W_A	CR_04530W_A	FUM11	Ca22chrRA_C_albicans_SC5314:997808-999619	37Control	37	OK	94.5956	146.876	0.634754	0.630096	0.37855	0.728814	no
C1_09910C_A	C1_09910C_A	C1_09910C_A	C1_09910C_A	Ca22chr1A_C_albicans_SC5314:2167565-2168384	37Control	37	OK	45.926	71.2991	0.634572	0.789132	0.268	0.609267	no
C3_06970W_A	C3_06970W_A	C3_06970W_A	C3_06970W_A	Ca22chr3A_C_albicans_SC5314:1595829-1597650	37Control	37	OK	18.8636	29.2748	0.634054	0.807169	0.2487	0.585533	no
C5_04660C_A	C5_04660C_A	C5_04660C_A	TIP1	Ca22chr5A_C_albicans_SC5314:1012144-1012900	37Control	37	OK	65.2241	101.163	0.633199	0.80448	0.2427	0.576933	no
C1_08760W_A	C1_08760W_A	C1_08760W_A	C1_08760W_A	Ca22chr1A_C_albicans_SC5314:1908827-1909877	37Control	37	OK	34.8014	53.9728	0.633086	0.806673	0.23875	0.572046	no
C2_01740C_A	C2_01740C_A	C2_01740C_A	C2_01740C_A	Ca22chr2A_C_albicans_SC5314:311791-312133	37Control	37	OK	326.745	506.705	0.63298	0.830173	0.20965	0.534049	no
CR_06110C_A	CR_06110C_A	CR_06110C_A	RFX1	Ca22chrRA_C_albicans_SC5314:1302430-1304986	37Control	37	OK	14.0206	21.7392	0.63275	0.719822	0.29655	0.644195	no
C1_13750C_A	C1_13750C_A	C1_13750C_A	C1_13750C_A	Ca22chr1A_C_albicans_SC5314:3020077-3020674	37Control	37	OK	31.5649	48.9272	0.632318	0.724196	0.3156	0.664913	no
C4_00660W_A	C4_00660W_A	C4_00660W_A	C4_00660W_A	Ca22chr4A_C_albicans_SC5314:112690-113431	37Control	37	OK	166.56	258.169	0.632273	0.773346	0.25975	0.598751	no
C5_00370W_A	C5_00370W_A	C5_00370W_A	COF1	Ca22chr5A_C_albicans_SC5314:67604-68261	37Control	37	OK	1221.33	1890.51	0.63032	0.533034	0.45295	0.794862	no
C3_04780C_A	C3_04780C_A	C3_04780C_A	C3_04780C_A	Ca22chr3A_C_albicans_SC5314:1018053-1019091	37Control	37	OK	66.2893	102.409	0.62749	0.762607	0.27235	0.61467	no
C2_08760C_A	C2_08760C_A	C2_08760C_A	TIF4631	Ca22chr2A_C_albicans_SC5314:1779859-1783114	37Control	37	OK	93.6025	144.464	0.626094	0.589621	0.41025	0.758447	no
C3_06570C_A	C3_06570C_A	C3_06570C_A	OPI3	Ca22chr3A_C_albicans_SC5314:1498395-1499073	37Control	37	OK	57.0678	88.0666	0.625917	0.74592	0.2884	0.634063	no
C2_02870W_A	C2_02870W_A	C2_02870W_A	C2_02870W_A	Ca22chr2A_C_albicans_SC5314:574345-575000	37Control	37	OK	77.6996	119.903	0.62589	0.794518	0.2481	0.584559	no
CR_05700C_A	CR_05700C_A	CR_05700C_A	CR_05700C_A	Ca22chrRA_C_albicans_SC5314:1210657-1211560	37Control	37	OK	65.0662	100.403	0.625816	0.820516	0.21945	0.548479	no
C1_08600C_A	C1_08600C_A	C1_08600C_A	GCD6	Ca22chr1A_C_albicans_SC5314:1882756-1884955	37Control	37	OK	57.64	88.9347	0.625678	0.739634	0.27515	0.617473	no
C1_04190C_A	C1_04190C_A	C1_04190C_A	BST1	Ca22chr1A_C_albicans_SC5314:872591-873764	37Control	37	OK	38.7463	59.7633	0.625199	0.797616	0.24925	0.586286	no
C5_00420C_A	C5_00420C_A	C5_00420C_A	MRP17	Ca22chr5A_C_albicans_SC5314:77776-78136	37Control	37	OK	435.761	672.101	0.62514	0.784938	0.22895	0.560181	no
C1_08920W_A	C1_08920W_A	C1_08920W_A	C1_08920W_A	Ca22chr1A_C_albicans_SC5314:1938479-1939367	37Control	37	OK	91.9003	141.738	0.625081	0.79469	0.23785	0.570616	no
C7_01450C_A	C7_01450C_A	C7_01450C_A	PRT1	Ca22chr7A_C_albicans_SC5314:303150-305370	37Control	37	OK	127.948	197.259	0.62453	0.627721	0.35825	0.709281	no
C7_01270C_A	C7_01270C_A	C7_01270C_A	C7_01270C_A	Ca22chr7A_C_albicans_SC5314:259273-261082	37Control	37	OK	25.3024	39.0031	0.624319	0.782413	0.2306	0.562537	no
C5_01900C_A	C5_01900C_A	C5_01900C_A	C5_01900C_A	Ca22chr5A_C_albicans_SC5314:428853-429018	37Control	37	OK	565.009	870.72	0.623935	0.667127	0.3516	0.702491	no
CR_08210C_A	CR_08210C_A	CR_08210C_A	ACO1	Ca22chrRA_C_albicans_SC5314:1783403-1785737	37Control	37	OK	404.727	623.548	0.623553	0.490571	0.47785	0.810619	no
CR_04570C_A	CR_04570C_A	CR_04570C_A	CDC10	Ca22chrRA_C_albicans_SC5314:1002170-1003244	37Control	37	OK	162.412	250.101	0.622854	0.639367	0.34205	0.692073	no
CR_10760C_A	CR_10760C_A	CR_10760C_A	CR_10760C_A	Ca22chrRA_C_albicans_SC5314:2273273-2273660	37Control	37	OK	158.017	243.042	0.621126	0.789925	0.25825	0.596942	no
C3_03320W_A	C3_03320W_A	C3_03320W_A	RUB1	Ca22chr3A_C_albicans_SC5314:699326-699560	37Control	37	OK	676.099	1039.64	0.620781	0.792769	0.24615	0.581638	no
C1_03630W_A	C1_03630W_A	C1_03630W_A	C1_03630W_A	Ca22chr1A_C_albicans_SC5314:752774-756314	37Control	37	OK	9.70592	14.9136	0.61969	0.766031	0.2874	0.632786	no
C3_04610W_A	C3_04610W_A	C3_04610W_A	MEA1	Ca22chr3A_C_albicans_SC5314:976462-978352	37Control	37	OK	7.6779	11.7947	0.619359	0.726783	0.293	0.639325	no
CR_05990C_A	CR_05990C_A	CR_05990C_A	SFL1	Ca22chrRA_C_albicans_SC5314:1255694-1258112	37Control	37	OK	28.5967	43.9282	0.619297	0.708954	0.2975	0.644812	no
CR_03980W_A	CR_03980W_A	CR_03980W_A	CR_03980W_A	Ca22chrRA_C_albicans_SC5314:900135-900864	37Control	37	OK	89.2077	137.002	0.618955	0.794148	0.24395	0.578982	no
C1_00500C_A	C1_00500C_A	C1_00500C_A	GLO1	Ca22chr1A_C_albicans_SC5314:78640-79669	37Control	37	OK	154.697	237.4	0.617873	0.532628	0.4403	0.784911	no
C7_02680W_A	C7_02680W_A	C7_02680W_A	TOM22	Ca22chr7A_C_albicans_SC5314:571202-571655	37Control	37	OK	510.774	783.801	0.617802	0.722387	0.2829	0.626947	no
C1_05560W_A	C1_05560W_A	C1_05560W_A	RIB4	Ca22chr1A_C_albicans_SC5314:1166876-1167580	37Control	37	OK	199.244	305.599	0.617107	0.640161	0.35195	0.702892	no
C5_04650C_A	C5_04650C_A	C5_04650C_A	MSM1	Ca22chr5A_C_albicans_SC5314:1010219-1011953	37Control	37	OK	25.439	39.0178	0.61709	0.790238	0.24935	0.58633	no
C2_09740W_A	C2_09740W_A	C2_09740W_A	SSO2	Ca22chr2A_C_albicans_SC5314:1989823-1990711	37Control	37	OK	117.522	180.195	0.616627	0.755534	0.2759	0.618055	no
C5_03110C_A	C5_03110C_A	C5_03110C_A	C5_03110C_A	Ca22chr5A_C_albicans_SC5314:690599-691057	37Control	37	OK	86.5914	132.68	0.615659	0.721149	0.31285	0.662082	no
C2_05300C_A	C2_05300C_A	C2_05300C_A	C2_05300C_A	Ca22chr2A_C_albicans_SC5314:1091742-1092969	37Control	37	OK	183.134	280.586	0.615543	0.715813	0.2932	0.639465	no
C2_09510C_A	C2_09510C_A	C2_09510C_A	C2_09510C_A	Ca22chr2A_C_albicans_SC5314:1943574-1945293	37Control	37	OK	41.0742	62.916	0.615197	0.708977	0.3028	0.650164	no
C7_03050W_A	C7_03050W_A	C7_03050W_A	C7_03050W_A	Ca22chr7A_C_albicans_SC5314:659497-660100	37Control	37	OK	160.333	245.593	0.615196	0.789586	0.25295	0.591076	no
CR_05760C_A	CR_05760C_A	CR_05760C_A	CR_05760C_A	Ca22chrRA_C_albicans_SC5314:1221034-1222030	37Control	37	OK	23.3381	35.7477	0.615163	0.75425	0.2691	0.610442	no
C2_02580W_A	C2_02580W_A	C2_02580W_A	C2_02580W_A	Ca22chr2A_C_albicans_SC5314:521087-522620	37Control	37	OK	39.3715	60.2959	0.614907	0.675663	0.3226	0.672084	no
C2_01030W_A	C2_01030W_A	C2_01030W_A	C2_01030W_A	Ca22chr2A_C_albicans_SC5314:172316-172958	37Control	37	OK	229.92	352.061	0.614693	0.730403	0.30325	0.650537	no
CR_02020C_A	CR_02020C_A	CR_02020C_A	OPT1	Ca22chrRA_C_albicans_SC5314:440886-443238	37Control	37	OK	11.0678	16.9457	0.614549	0.737114	0.30475	0.651973	no
C3_01520C_A	C3_01520C_A	C3_01520C_A	C3_01520C_A	Ca22chr3A_C_albicans_SC5314:322838-323900	37Control	37	OK	144.286	220.824	0.613967	0.674281	0.3273	0.676695	no
CR_01100C_A	CR_01100C_A	CR_01100C_A	CR_01100C_A	Ca22chrRA_C_albicans_SC5314:250792-251212	37Control	37	OK	128.343	196.404	0.613826	0.782745	0.25385	0.59196	no
CR_03110W_A	CR_03110W_A	CR_03110W_A	CR_03110W_A	Ca22chrRA_C_albicans_SC5314:706381-707911	37Control	37	OK	33.6208	51.4433	0.613629	0.78012	0.256	0.594692	no
C1_12210W_A	C1_12210W_A	C1_12210W_A	TRP3	Ca22chr1A_C_albicans_SC5314:2664809-2666372	37Control	37	OK	42.428	64.8982	0.613162	0.78639	0.2554	0.593927	no
C7_04210C_A	C7_04210C_A	C7_04210C_A	C7_04210C_A	Ca22chr7A_C_albicans_SC5314:907551-908649	37Control	37	OK	207.585	317.498	0.613047	0.605305	0.36125	0.712103	no
C7_01810W_A	C7_01810W_A	C7_01810W_A	RVB2	Ca22chr7A_C_albicans_SC5314:390346-391843	37Control	37	OK	97.237	148.673	0.612561	0.686891	0.31215	0.661269	no
C1_09450C_A	C1_09450C_A	C1_09450C_A	NUP188	Ca22chr1A_C_albicans_SC5314:2082039-2086968	37Control	37	OK	19.0813	29.1676	0.612209	0.750024	0.2749	0.617206	no
C1_03080C_A	C1_03080C_A	C1_03080C_A	TEM1	Ca22chr1A_C_albicans_SC5314:641961-642642	37Control	37	OK	23.702	36.2281	0.612099	0.681961	0.32095	0.670708	no
C3_03170W_A	C3_03170W_A	C3_03170W_A	SEC13	Ca22chr3A_C_albicans_SC5314:674582-675479	37Control	37	OK	161.864	247.289	0.611419	0.617306	0.35955	0.710388	no
C2_02930C_A	C2_02930C_A	C2_02930C_A	C2_02930C_A	Ca22chr2A_C_albicans_SC5314:584176-585442	37Control	37	OK	190.097	290.406	0.611337	0.524086	0.4257	0.773645	no
C1_12690C_A	C1_12690C_A	C1_12690C_A	C1_12690C_A	Ca22chr1A_C_albicans_SC5314:2766269-2766920	37Control	37	OK	10.1916	15.5645	0.610882	0.56672	0.4185	0.766104	no
C1_13520C_A	C1_13520C_A	C1_13520C_A	MCU1	Ca22chr1A_C_albicans_SC5314:2963188-2964004	37Control	37	OK	47.386	72.3171	0.609877	0.782411	0.25665	0.595302	no
C2_01980C_A	C2_01980C_A	C2_01980C_A	SRD1	Ca22chr2A_C_albicans_SC5314:374510-376388	37Control	37	OK	17.1253	26.1314	0.609657	0.778963	0.2547	0.592915	no
CR_01800C_A	CR_01800C_A	CR_01800C_A	HST2	Ca22chrRA_C_albicans_SC5314:408028-409024	37Control	37	OK	19.2849	29.4204	0.609347	0.718798	0.3096	0.658608	no
CR_01910C_A	CR_01910C_A	CR_01910C_A	CR_01910C_A	Ca22chrRA_C_albicans_SC5314:422476-423115	37Control	37	OK	4.34748	6.62475	0.607687	0.5281	0.435	0.780773	no
C4_03580W_A	C4_03580W_A	C4_03580W_A	C4_03580W_A	Ca22chr4A_C_albicans_SC5314:765641-766715	37Control	37	OK	25.7296	39.1888	0.607009	0.755033	0.2924	0.63846	no
C3_05060W_A	C3_05060W_A	C3_05060W_A	C3_05060W_A	Ca22chr3A_C_albicans_SC5314:1089894-1091235	37Control	37	OK	12.6341	19.2398	0.606773	0.716983	0.31305	0.662208	no
C1_10300W_A	C1_10300W_A	C1_10300W_A	MNN12	Ca22chr1A_C_albicans_SC5314:2276259-2278746	37Control	37	OK	18.9935	28.9064	0.605886	0.680954	0.3396	0.689095	no
C2_03910C_A	C2_03910C_A	C2_03910C_A	C2_03910C_A	Ca22chr2A_C_albicans_SC5314:816219-818748	37Control	37	OK	17.5368	26.6778	0.605255	0.773956	0.25985	0.598835	no
C5_03380W_A	C5_03380W_A	C5_03380W_A	ARP1	Ca22chr5A_C_albicans_SC5314:764895-766140	37Control	37	OK	10.1451	15.4283	0.604799	0.679315	0.31635	0.6656	no
C3_07000W_A	C3_07000W_A	C3_07000W_A	RPD31	Ca22chr3A_C_albicans_SC5314:1600834-1602568	37Control	37	OK	29.1388	44.3072	0.604602	0.771168	0.2708	0.612748	no
C1_03720C_A	C1_03720C_A	C1_03720C_A	C1_03720C_A	Ca22chr1A_C_albicans_SC5314:773998-775771	37Control	37	OK	9.13311	13.8793	0.603753	0.681377	0.33415	0.683459	no
C3_03910W_A	C3_03910W_A	C3_03910W_A	HTA1	Ca22chr3A_C_albicans_SC5314:818803-819202	37Control	37	OK	1229.32	1867.4	0.603167	0.570086	0.40005	0.748182	no
C2_06750C_A	C2_06750C_A	C2_06750C_A	C2_06750C_A	Ca22chr2A_C_albicans_SC5314:1386152-1386893	37Control	37	OK	29.1896	44.3121	0.602244	0.708424	0.3229	0.672084	no
C5_04290C_A	C5_04290C_A	C5_04290C_A	C5_04290C_A	Ca22chr5A_C_albicans_SC5314:952050-953346	37Control	37	OK	118.105	179.287	0.602197	0.661683	0.3434	0.693538	no
C5_05160C_A	C5_05160C_A	C5_05160C_A	CNB1	Ca22chr5A_C_albicans_SC5314:1132797-1133319	37Control	37	OK	126.47	191.876	0.60138	0.769209	0.26265	0.601973	no
C1_04260W_A	C1_04260W_A	C1_04260W_A	HHT21	Ca22chr1A_C_albicans_SC5314:882164-882575	37Control	37	OK	1346.63	2041.85	0.600526	0.523455	0.4586	0.798681	no
C1_00910W_A	C1_00910W_A	C1_00910W_A	C1_00910W_A	Ca22chr1A_C_albicans_SC5314:179822-180829	37Control	37	OK	26.1716	39.6679	0.599967	0.704452	0.3202	0.670182	no
CR_09890C_A	CR_09890C_A	CR_09890C_A	BET2	Ca22chrRA_C_albicans_SC5314:2112884-2113910	37Control	37	OK	30.9809	46.9442	0.59957	0.752025	0.2915	0.637381	no
CR_08520C_A	CR_08520C_A	CR_08520C_A	CR_08520C_A	Ca22chrRA_C_albicans_SC5314:1840749-1841170	37Control	37	OK	198.749	301.13	0.599438	0.760194	0.26945	0.610941	no
C1_11760C_A	C1_11760C_A	C1_11760C_A	C1_11760C_A	Ca22chr1A_C_albicans_SC5314:2576805-2577432	37Control	37	OK	123.845	187.611	0.599206	0.771499	0.26695	0.607834	no
C2_06790W_A	C2_06790W_A	C2_06790W_A	C2_06790W_A	Ca22chr2A_C_albicans_SC5314:1392263-1392623	37Control	37	OK	83.252	126.064	0.598596	0.704563	0.3161	0.665477	no
CR_09110C_A	CR_09110C_A	CR_09110C_A	CR_09110C_A	Ca22chrRA_C_albicans_SC5314:1943867-1944725	37Control	37	OK	111.296	168.433	0.597766	0.7556	0.25365	0.59186	no
CR_06610W_A	CR_06610W_A	CR_06610W_A	STE2	Ca22chrRA_C_albicans_SC5314:1418648-1420058	37Control	37	OK	1.5277	2.31115	0.597245	0.5274	0.44245	0.786258	no
C1_14270W_A	C1_14270W_A	C1_14270W_A	C1_14270W_A	Ca22chr1A_C_albicans_SC5314:3145302-3146106	37Control	37	OK	30.6312	46.3246	0.596774	0.736615	0.29075	0.637108	no
C1_00630W_A	C1_00630W_A	C1_00630W_A	C1_00630W_A	Ca22chr1A_C_albicans_SC5314:105178-106924	37Control	37	OK	6.29862	9.525	0.596682	0.671191	0.33	0.679175	no
C1_02310C_A	C1_02310C_A	C1_02310C_A	C1_02310C_A	Ca22chr1A_C_albicans_SC5314:484173-484539	37Control	37	OK	115.308	174.33	0.596327	0.733604	0.2908	0.637108	no
C7_01630W_A	C7_01630W_A	C7_01630W_A	RNH35	Ca22chr7A_C_albicans_SC5314:350988-352284	37Control	37	OK	13.8351	20.8988	0.595084	0.692928	0.31675	0.666131	no
C2_06190W_A	C2_06190W_A	C2_06190W_A	ILV1	Ca22chr2A_C_albicans_SC5314:1262841-1264551	37Control	37	OK	76.182	115.076	0.595069	0.693711	0.29685	0.644355	no
C6_00030W_A	C6_00030W_A	C6_00030W_A	TLO13	Ca22chr6A_C_albicans_SC5314:5544-6069	37Control	37	OK	56.8591	85.864	0.594661	0.727682	0.2806	0.624534	no
C7_03250C_A	C7_03250C_A	C7_03250C_A	PDI1	Ca22chr7A_C_albicans_SC5314:705588-707268	37Control	37	OK	329.57	497.649	0.594544	0.486831	0.4983	0.824104	no
C6_02450W_A	C6_02450W_A	C6_02450W_A	C6_02450W_A	Ca22chr6A_C_albicans_SC5314:508861-509665	37Control	37	OK	24.9396	37.6335	0.593581	0.666923	0.32615	0.675133	no
C2_10760C_A	C2_10760C_A	C2_10760C_A	C2_10760C_A	Ca22chr2A_C_albicans_SC5314:2211079-2213146	37Control	37	OK	26.1036	39.382	0.59329	0.774538	0.23955	0.573016	no
C1_00360W_A	C1_00360W_A	C1_00360W_A	CDC13	Ca22chr1A_C_albicans_SC5314:53098-54442	37Control	37	OK	13.2485	19.9797	0.592712	0.697225	0.32275	0.672084	no
C7_01890C_A	C7_01890C_A	C7_01890C_A	TOM7	Ca22chr7A_C_albicans_SC5314:405641-405839	37Control	37	OK	1431.32	2158.22	0.592492	0.778031	0.24545	0.58105	no
C2_03270W_A	C2_03270W_A	C2_03270W_A	GPM1	Ca22chr2A_C_albicans_SC5314:675805-676552	37Control	37	OK	6492.99	9789.6	0.592368	0.369723	0.59965	0.880257	no
CR_07520C_A	CR_07520C_A	CR_07520C_A	YPT31	Ca22chrRA_C_albicans_SC5314:1627965-1628634	37Control	37	OK	183.826	277.149	0.592319	0.728619	0.29575	0.643091	no
C1_07590C_A	C1_07590C_A	C1_07590C_A	C1_07590C_A	Ca22chr1A_C_albicans_SC5314:1641985-1645111	37Control	37	OK	11.8117	17.8074	0.592267	0.777833	0.24105	0.574971	no
C1_07420C_A	C1_07420C_A	C1_07420C_A	PEX3	Ca22chr1A_C_albicans_SC5314:1605355-1606747	37Control	37	OK	33.7151	50.8083	0.59167	0.753225	0.28065	0.624534	no
C2_01540W_A	C2_01540W_A	C2_01540W_A	C2_01540W_A	Ca22chr2A_C_albicans_SC5314:275531-276701	37Control	37	OK	30.2122	45.5205	0.591386	0.742312	0.29075	0.637108	no
C7_00520W_A	C7_00520W_A	C7_00520W_A	C7_00520W_A	Ca22chr7A_C_albicans_SC5314:84176-87452	37Control	37	OK	37.7083	56.7844	0.590612	0.707768	0.31065	0.659936	no
C4_02780W_A	C4_02780W_A	C4_02780W_A	C4_02780W_A	Ca22chr4A_C_albicans_SC5314:580678-582313	37Control	37	OK	139.091	209.437	0.590487	0.642457	0.3522	0.703019	no
C3_03060W_A	C3_03060W_A	C3_03060W_A	C3_03060W_A	Ca22chr3A_C_albicans_SC5314:651581-652064	37Control	37	OK	45.7358	68.8652	0.590451	0.695534	0.314	0.663621	no
CR_04080C_A	CR_04080C_A	CR_04080C_A	CR_04080C_A	Ca22chrRA_C_albicans_SC5314:915380-917402	37Control	37	OK	95.9393	144.445	0.590325	0.642033	0.3749	0.725219	no
C3_06020W_A	C3_06020W_A	C3_06020W_A	MNN9	Ca22chr3A_C_albicans_SC5314:1368672-1369779	37Control	37	OK	124.554	187.356	0.589014	0.701602	0.31155	0.660741	no
C7_00670C_A	C7_00670C_A	C7_00670C_A	C7_00670C_A	Ca22chr7A_C_albicans_SC5314:122843-126245	37Control	37	OK	10.5021	15.7973	0.589007	0.745398	0.2728	0.615131	no
C1_03550C_A	C1_03550C_A	C1_03550C_A	COQ6	Ca22chr1A_C_albicans_SC5314:744890-746333	37Control	37	OK	73.9843	111.207	0.587962	0.65292	0.3444	0.694813	no
C5_03100C_A	C5_03100C_A	C5_03100C_A	C5_03100C_A	Ca22chr5A_C_albicans_SC5314:688981-689980	37Control	37	OK	50.8306	76.3892	0.58767	0.773868	0.24665	0.582381	no
C5_05170W_A	C5_05170W_A	C5_05170W_A	PAN3	Ca22chr5A_C_albicans_SC5314:1133821-1135915	37Control	37	OK	30.0487	45.1477	0.587349	0.749268	0.28505	0.628973	no
C6_03490C_A	C6_03490C_A	C6_03490C_A	SAP1	Ca22chr6A_C_albicans_SC5314:741927-743103	37Control	37	OK	13.4077	20.1369	0.586784	0.663183	0.33645	0.686421	no
C7_00940W_A	C7_00940W_A	C7_00940W_A	C7_00940W_A	Ca22chr7A_C_albicans_SC5314:198459-200568	37Control	37	OK	53.9279	80.9934	0.586772	0.702382	0.31395	0.66359	no
C4_01560C_A	C4_01560C_A	C4_01560C_A	C4_01560C_A	Ca22chr4A_C_albicans_SC5314:321751-324649	37Control	37	OK	10.2507	15.3742	0.584781	0.689688	0.33615	0.686032	no
C5_01910W_A	C5_01910W_A	C5_01910W_A	GIS2	Ca22chr5A_C_albicans_SC5314:429591-430119	37Control	37	OK	1045.09	1567.39	0.584738	0.556463	0.42865	0.775447	no
C1_04530C_A	C1_04530C_A	C1_04530C_A	C1_04530C_A	Ca22chr1A_C_albicans_SC5314:934146-935706	37Control	37	OK	32.0896	48.1116	0.58428	0.747302	0.276	0.618055	no
C3_03690W_A	C3_03690W_A	C3_03690W_A	C3_03690W_A	Ca22chr3A_C_albicans_SC5314:779860-780721	37Control	37	OK	8.68208	13.0063	0.583092	0.588945	0.3877	0.736345	no
CR_03050C_A	CR_03050C_A	CR_03050C_A	ZCF11	Ca22chrRA_C_albicans_SC5314:695732-697517	37Control	37	OK	20.9653	31.4058	0.58303	0.744294	0.27225	0.61467	no
C1_06820W_A	C1_06820W_A	C1_06820W_A	C1_06820W_A	Ca22chr1A_C_albicans_SC5314:1455537-1456530	37Control	37	OK	58.9432	88.2893	0.582914	0.686396	0.33765	0.68747	no
CR_06180W_A	CR_06180W_A	CR_06180W_A	ARC40	Ca22chrRA_C_albicans_SC5314:1322878-1324033	37Control	37	OK	119.909	179.574	0.582631	0.590281	0.39165	0.739744	no
CR_07320C_A	CR_07320C_A	CR_07320C_A	CR_07320C_A	Ca22chrRA_C_albicans_SC5314:1594103-1595033	37Control	37	OK	173.234	259.091	0.580736	0.67618	0.31145	0.660678	no
CR_08050C_A	CR_08050C_A	CR_08050C_A	CR_08050C_A	Ca22chrRA_C_albicans_SC5314:1756913-1757813	37Control	37	OK	75.5065	112.916	0.58058	0.709618	0.3005	0.647696	no
C6_02750C_A	C6_02750C_A	C6_02750C_A	LYS14	Ca22chr6A_C_albicans_SC5314:567102-568881	37Control	37	OK	8.59097	12.8447	0.580279	0.681649	0.3284	0.677866	no
CM_00250W	CM_00250W	CM_00250W	CM_00250W	Ca22chrM_C_albicans_SC5314:14770-20926	37Control	37	NOTEST	0.0475538	0.0710763	0.579807	0	1	1	no
C1_00390W_A	C1_00390W_A	C1_00390W_A	ENA2	Ca22chr1A_C_albicans_SC5314:59348-62552	37Control	37	OK	15.6456	23.3828	0.579698	0.75986	0.25175	0.589618	no
C3_04950W_A	C3_04950W_A	C3_04950W_A	ARF2	Ca22chr3A_C_albicans_SC5314:1066126-1066672	37Control	37	OK	1041.65	1555.51	0.578517	0.549381	0.41655	0.764318	no
C6_01840C_A	C6_01840C_A	C6_01840C_A	COQ3	Ca22chr6A_C_albicans_SC5314:382541-383525	37Control	37	OK	67.7297	101.076	0.577578	0.735689	0.2724	0.61467	no
C4_00390W_A	C4_00390W_A	C4_00390W_A	C4_00390W_A	Ca22chr4A_C_albicans_SC5314:59709-60150	37Control	37	OK	296.455	442.359	0.577403	0.698556	0.3154	0.664913	no
C7_01180W_A	C7_01180W_A	C7_01180W_A	MDM12	Ca22chr7A_C_albicans_SC5314:248249-249536	37Control	37	OK	23.3396	34.8235	0.577281	0.738265	0.29145	0.637381	no
C6_00640C_A	C6_00640C_A	C6_00640C_A	C6_00640C_A	Ca22chr6A_C_albicans_SC5314:113322-114414	37Control	37	OK	38.2003	56.9701	0.576621	0.755984	0.25085	0.588462	no
C7_01620C_A	C7_01620C_A	C7_01620C_A	KCH1	Ca22chr7A_C_albicans_SC5314:347812-349792	37Control	37	OK	15.4751	23.0757	0.576424	0.733918	0.28465	0.628533	no
CR_03930C_A	CR_03930C_A	CR_03930C_A	CR_03930C_A	Ca22chrRA_C_albicans_SC5314:892916-894218	37Control	37	OK	41.6757	62.1268	0.576009	0.741058	0.28745	0.632786	no
CR_04000W_A	CR_04000W_A	CR_04000W_A	RPT4	Ca22chrRA_C_albicans_SC5314:903049-904336	37Control	37	OK	118.683	176.891	0.575751	0.635251	0.34035	0.689671	no
C2_04580W_A	C2_04580W_A	C2_04580W_A	ERG20	Ca22chr2A_C_albicans_SC5314:958568-959624	37Control	37	OK	240.024	357.551	0.574968	0.565964	0.4045	0.752767	no
CR_07690W_A	CR_07690W_A	CR_07690W_A	CR_07690W_A	Ca22chrRA_C_albicans_SC5314:1669650-1669986	37Control	37	OK	80.4988	119.797	0.573551	0.641367	0.3618	0.712367	no
C5_04530W_A	C5_04530W_A	C5_04530W_A	C5_04530W_A	Ca22chr5A_C_albicans_SC5314:989260-990049	37Control	37	OK	191.299	284.627	0.573242	0.687105	0.32515	0.674159	no
CR_02380C_A	CR_02380C_A	CR_02380C_A	CR_02380C_A	Ca22chrRA_C_albicans_SC5314:528824-529232	37Control	37	OK	78.7755	117.164	0.572714	0.649399	0.36	0.710755	no
C1_06110C_A	C1_06110C_A	C1_06110C_A	NPL4	Ca22chr1A_C_albicans_SC5314:1281139-1282936	37Control	37	OK	26.2888	39.0936	0.572485	0.731127	0.28745	0.632786	no
CR_10160W_A	CR_10160W_A	CR_10160W_A	FAA4	Ca22chrRA_C_albicans_SC5314:2172465-2174556	37Control	37	OK	196.134	291.598	0.572141	0.518814	0.4554	0.7962	no
C3_05770C_A	C3_05770C_A	C3_05770C_A	SAM50	Ca22chr3A_C_albicans_SC5314:1290740-1292264	37Control	37	OK	17.4482	25.9231	0.571157	0.725154	0.28365	0.627501	no
C5_00500W_A	C5_00500W_A	C5_00500W_A	NAM7	Ca22chr5A_C_albicans_SC5314:95042-98102	37Control	37	OK	60.6163	90.0428	0.570905	0.619224	0.389	0.737199	no
C4_02640C_A	C4_02640C_A	C4_02640C_A	SEN2	Ca22chr4A_C_albicans_SC5314:547907-549077	37Control	37	OK	52.1884	77.5016	0.570497	0.709828	0.3223	0.671964	no
C1_08450C_A	C1_08450C_A	C1_08450C_A	CDC42	Ca22chr1A_C_albicans_SC5314:1856783-1857359	37Control	37	OK	354.504	526.447	0.570488	0.633375	0.3589	0.709699	no
C5_02300C_A	C5_02300C_A	C5_02300C_A	RET2	Ca22chr5A_C_albicans_SC5314:509605-511327	37Control	37	OK	79.6663	118.282	0.570195	0.640619	0.3618	0.712367	no
C5_00980W_A	C5_00980W_A	C5_00980W_A	TRY3	Ca22chr5A_C_albicans_SC5314:218209-219694	37Control	37	OK	82.12	121.922	0.570148	0.68006	0.3338	0.683234	no
[truncated: 4,469 more rows]

## Sheet: B. Temp Data, 37C v 23C Flow
test_id	gene_id	Gene ID with Link	Gene Name	locus	sample_1	sample_2	status	value_1	value_2	log2(fold change)	test_stat	p_value	q_value	significant
C4_03470C_A	C4_03470C_A	C4_03470C_A	ECE1	Ca22chr4A_C_albicans_SC5314:726513-727329	RT_Controls	37_Treated	OK	1.48893	810.747	9.08883	8.57326	5e-05	0.0777125	Yes
C4_03570W_A	C4_03570W_A	C4_03570W_A	HWP1	Ca22chr4A_C_albicans_SC5314:762834-764739	RT_Controls	37_Treated	OK	4.76649	574.857	6.91413	5.91572	5e-05	0.0777125	Yes
C1_13440C_A	C1_13440C_A	C1_13440C_A	OFI1	Ca22chr1A_C_albicans_SC5314:2935418-2937365	RT_Controls	37_Treated	OK	0.039398	3.43577	6.44637	4.22821	0.03765	0.99995	Yes
C1_13450W_A	C1_13450W_A	C1_13450W_A	HYR1	Ca22chr1A_C_albicans_SC5314:2944586-2947346	RT_Controls	37_Treated	OK	1.70493	104.671	5.94	5.00577	5e-05	0.0777125	Yes
C6_03030W_A	C6_03030W_A	C6_03030W_A	SAP5	Ca22chr6A_C_albicans_SC5314:635172-636429	RT_Controls	37_Treated	OK	3.1564	104.349	5.04699	5.01038	5e-05	0.0777125	Yes
C6_01990W_A	C6_01990W_A	C6_01990W_A	PLB1	Ca22chr6A_C_albicans_SC5314:405912-407730	RT_Controls	37_Treated	OK	1.01826	29.8988	4.87591	4.05235	0.0001	0.0888143	Yes
C3_04310C_A	C3_04310C_A	C3_04310C_A	C3_04310C_A	Ca22chr3A_C_albicans_SC5314:898102-898993	RT_Controls	37_Treated	OK	0.0194751	0.561924	4.85067	2.32449	0.24965	0.99995	No
C3_00920W_A	C3_00920W_A	C3_00920W_A	ATO1	Ca22chr3A_C_albicans_SC5314:187452-188250	RT_Controls	37_Treated	OK	0.414443	10.5056	4.66384	4.30039	0.002	0.478231	Yes
C6_03600C_A	C6_03600C_A	C6_03600C_A	C6_03600C_A	Ca22chr6A_C_albicans_SC5314:763187-764768	RT_Controls	37_Treated	OK	0.389641	9.06421	4.53996	3.77713	0.00045	0.215204	Yes
C1_04050C_A	C1_04050C_A	C1_04050C_A	MFALPHA	Ca22chr1A_C_albicans_SC5314:851795-852227	RT_Controls	37_Treated	OK	0.0587019	1.34358	4.51653	3.06437	0.25395	0.99995	No
C7_03310W_A	C7_03310W_A	C7_03310W_A	C7_03310W_A	Ca22chr7A_C_albicans_SC5314:731778-732447	RT_Controls	37_Treated	OK	8.4396	191.802	4.5063	4.91936	0.0002	0.12434	Yes
C3_01540W_A	C3_01540W_A	C3_01540W_A	C3_01540W_A	Ca22chr3A_C_albicans_SC5314:335764-336352	RT_Controls	37_Treated	OK	98.6608	2090.09	4.40494	4.55725	0.00105	0.362658	Yes
C6_03500C_A	C6_03500C_A	C6_03500C_A	SAP4	Ca22chr6A_C_albicans_SC5314:744961-746215	RT_Controls	37_Treated	OK	0.567412	11.4038	4.32898	3.93416	0.0001	0.0888143	Yes
C4_03500C_A	C4_03500C_A	C4_03500C_A	C4_03500C_A	Ca22chr4A_C_albicans_SC5314:734838-735390	RT_Controls	37_Treated	OK	1.13561	15.095	3.73252	4.53861	0.0016	0.427419	Yes
C4_00450C_A	C4_00450C_A	C4_00450C_A	PGA10	Ca22chr4A_C_albicans_SC5314:72787-73540	RT_Controls	37_Treated	OK	35.1534	465.044	3.72563	3.79938	0.00125	0.388563	Yes
CR_01220W_A	CR_01220W_A	CR_01220W_A	CR_01220W_A	Ca22chrRA_C_albicans_SC5314:282663-284229	RT_Controls	37_Treated	OK	1.15035	14.6271	3.6685	3.17974	0.0029	0.515123	Yes
C3_02300W_A	C3_02300W_A	C3_02300W_A	FGR23	Ca22chr3A_C_albicans_SC5314:499464-502809	RT_Controls	37_Treated	OK	1.06652	13.196	3.62912	3.07656	0.00165	0.427419	Yes
C1_02690C_A	C1_02690C_A	C1_02690C_A	C1_02690C_A	Ca22chr1A_C_albicans_SC5314:562356-562659	RT_Controls	37_Treated	OK	0.715728	8.72145	3.60708	6.13917	0.0282	0.99995	Yes
C2_09080C_A	C2_09080C_A	C2_09080C_A	FGR18	Ca22chr2A_C_albicans_SC5314:1858790-1859419	RT_Controls	37_Treated	OK	0.0433084	0.48286	3.47889	1.9885	0.2836	0.99995	No
C5_05220W_A	C5_05220W_A	C5_05220W_A	CAG1	Ca22chr5A_C_albicans_SC5314:1143524-1144814	RT_Controls	37_Treated	OK	1.38347	14.9365	3.43247	3.39597	0.00075	0.31085	Yes
CR_08510W_A	CR_08510W_A	CR_08510W_A	PGA13	Ca22chrRA_C_albicans_SC5314:1838762-1840133	RT_Controls	37_Treated	OK	11.6884	123.076	3.39639	3.64049	0.0002	0.12434	Yes
C5_01750C_A	C5_01750C_A	C5_01750C_A	MTLA2	Ca22chr5A_C_albicans_SC5314:394559-395220	RT_Controls	37_Treated	OK	0.612444	6.21141	3.34227	3.37661	0.00915	0.991504	Yes
C4_06920C_A	C4_06920C_A	C4_06920C_A	CSA2	Ca22chr4A_C_albicans_SC5314:1539949-1540393	RT_Controls	37_Treated	OK	0.637937	6.3301	3.31074	3.92634	0.01525	0.99995	Yes
C6_03850C_A	C6_03850C_A	C6_03850C_A	IHD1	Ca22chr6A_C_albicans_SC5314:838280-839459	RT_Controls	37_Treated	OK	54.5321	522.397	3.25997	3.19556	0.00245	0.502846	Yes
C4_04790W_A	C4_04790W_A	C4_04790W_A	FAV1	Ca22chr4A_C_albicans_SC5314:1027531-1030078	RT_Controls	37_Treated	OK	0.464904	4.30615	3.21139	2.754	0.0014	0.414467	Yes
C4_05780C_A	C4_05780C_A	C4_05780C_A	CFL2	Ca22chr4A_C_albicans_SC5314:1276924-1279141	RT_Controls	37_Treated	OK	1.29178	11.6191	3.16907	2.72956	0.00535	0.669523	Yes
CR_02490W_A	CR_02490W_A	CR_02490W_A	OPT4	Ca22chrRA_C_albicans_SC5314:550904-552005	RT_Controls	37_Treated	OK	5.89417	51.4976	3.12714	3.36636	0.00105	0.362658	Yes
C1_05830W_A	C1_05830W_A	C1_05830W_A	C1_05830W_A	Ca22chr1A_C_albicans_SC5314:1213934-1214855	RT_Controls	37_Treated	OK	0.142811	1.22683	3.10277	2.3738	0.04125	0.99995	Yes
C2_03710W_A	C2_03710W_A	C2_03710W_A	C2_03710W_A	Ca22chr2A_C_albicans_SC5314:785868-788415	RT_Controls	37_Treated	OK	0.218558	1.85186	3.08289	2.29971	0.0096	0.99472	Yes
C5_01380W_A	C5_01380W_A	C5_01380W_A	CFL5	Ca22chr5A_C_albicans_SC5314:308741-310874	RT_Controls	37_Treated	OK	0.213593	1.80297	3.07744	2.36241	0.01145	0.99995	Yes
C4_01350W_A	C4_01350W_A	C4_01350W_A	C4_01350W_A	Ca22chr4A_C_albicans_SC5314:274640-274952	RT_Controls	37_Treated	OK	0.0999632	0.843459	3.07685	2.65751	0.2694	0.99995	No
C4_02610C_A	C4_02610C_A	C4_02610C_A	SUL2	Ca22chr4A_C_albicans_SC5314:539024-541505	RT_Controls	37_Treated	OK	4.58535	36.4781	2.99192	3.28944	0.0002	0.12434	Yes
C4_00200C_A	C4_00200C_A	C4_00200C_A	MET15	Ca22chr4A_C_albicans_SC5314:29745-31982	RT_Controls	37_Treated	OK	77.9259	596.416	2.93614	2.4645	0.00215	0.488479	Yes
C6_03570W_A	C6_03570W_A	C6_03570W_A	C6_03570W_A	Ca22chr6A_C_albicans_SC5314:759010-759733	RT_Controls	37_Treated	OK	0.0470916	0.356494	2.92034	1.71012	0.16525	0.99995	No
C5_04260W_A	C5_04260W_A	C5_04260W_A	C5_04260W_A	Ca22chr5A_C_albicans_SC5314:944237-945479	RT_Controls	37_Treated	OK	1.69594	12.8344	2.91986	2.91364	0.00275	0.502846	Yes
C3_01060W_A	C3_01060W_A	C3_01060W_A	C3_01060W_A	Ca22chr3A_C_albicans_SC5314:216482-216692	RT_Controls	37_Treated	OK	8.1599	61.037	2.90306	11.6916	0.03065	0.99995	Yes
CR_03480W_A	CR_03480W_A	CR_03480W_A	CR_03480W_A	Ca22chrRA_C_albicans_SC5314:770492-772619	RT_Controls	37_Treated	OK	0.625077	4.6451	2.8936	2.66937	0.0027	0.502846	Yes
C1_07040C_A	C1_07040C_A	C1_07040C_A	C1_07040C_A	Ca22chr1A_C_albicans_SC5314:1502166-1503120	RT_Controls	37_Treated	OK	0.251402	1.8618	2.88863	2.30127	0.03005	0.99995	Yes
CR_02290W_A	CR_02290W_A	CR_02290W_A	PGA22	Ca22chrRA_C_albicans_SC5314:511770-512280	RT_Controls	37_Treated	OK	0.77433	5.68388	2.87586	2.92089	0.0381	0.99995	Yes
C5_03060C_A	C5_03060C_A	C5_03060C_A	TNA1	Ca22chr5A_C_albicans_SC5314:679514-681047	RT_Controls	37_Treated	OK	2.20311	15.7219	2.83517	2.73441	0.00435	0.600977	Yes
C1_13870W_A	C1_13870W_A	C1_13870W_A	MET3	Ca22chr1A_C_albicans_SC5314:3051418-3053002	RT_Controls	37_Treated	OK	50.5444	360.512	2.83443	2.94225	0.00065	0.288646	Yes
CR_06500C_A	CR_06500C_A	CR_06500C_A	CR_06500C_A	Ca22chrRA_C_albicans_SC5314:1389143-1389644	RT_Controls	37_Treated	OK	20.1909	142.729	2.82151	4.38794	0.00185	0.460058	Yes
CR_06660W_A	CR_06660W_A	CR_06660W_A	SEO1	Ca22chrRA_C_albicans_SC5314:1429409-1431239	RT_Controls	37_Treated	OK	10.5782	73.7679	2.8019	3.02697	0.0004	0.207233	Yes
C6_02710C_A	C6_02710C_A	C6_02710C_A	SAP6	Ca22chr6A_C_albicans_SC5314:558151-559408	RT_Controls	37_Treated	OK	1.50374	10.3179	2.77853	2.71799	0.0039	0.600506	Yes
C1_06260W_A	C1_06260W_A	C1_06260W_A	PGA50	Ca22chr1A_C_albicans_SC5314:1309502-1310432	RT_Controls	37_Treated	NOTEST	0.0304672	0.207641	2.76876	0	1	1	No
CR_02280W_A	CR_02280W_A	CR_02280W_A	PGA23	Ca22chrRA_C_albicans_SC5314:510498-511347	RT_Controls	37_Treated	OK	9.88828	65.9574	2.73774	3.48521	0.0009	0.349706	Yes
CR_09220C_A	CR_09220C_A	CR_09220C_A	LIP7	Ca22chrRA_C_albicans_SC5314:1963271-1964552	RT_Controls	37_Treated	OK	0.651213	4.3121	2.72719	2.15413	0.0288	0.99995	Yes
C1_09400C_A	C1_09400C_A	C1_09400C_A	FTH1	Ca22chr1A_C_albicans_SC5314:2072062-2073337	RT_Controls	37_Treated	OK	5.71973	37.6742	2.71956	2.78557	0.00415	0.600506	Yes
C4_06900W_A	C4_06900W_A	C4_06900W_A	GST1	Ca22chr4A_C_albicans_SC5314:1536827-1537565	RT_Controls	37_Treated	OK	0.249554	1.59668	2.67765	2.46555	0.037	0.99995	Yes
CR_04620C_A	CR_04620C_A	CR_04620C_A	CR_04620C_A	Ca22chrRA_C_albicans_SC5314:1009944-1011462	RT_Controls	37_Treated	NOTEST	0.0252484	0.15538	2.62154	0	1	1	No
C4_00440C_A	C4_00440C_A	C4_00440C_A	OPT7	Ca22chr4A_C_albicans_SC5314:69498-71742	RT_Controls	37_Treated	OK	7.12224	43.6997	2.61722	2.96198	0.00035	0.197814	Yes
C2_01140C_A	C2_01140C_A	C2_01140C_A	C2_01140C_A	Ca22chr2A_C_albicans_SC5314:185862-186258	RT_Controls	37_Treated	OK	0.184881	1.13402	2.61678	2.7481	0.1088	0.99995	No
CR_06580W_A	CR_06580W_A	CR_06580W_A	CR_06580W_A	Ca22chrRA_C_albicans_SC5314:1406152-1406851	RT_Controls	37_Treated	OK	0.103437	0.631737	2.61057	1.93067	0.1164	0.99995	No
CR_02470W_A	CR_02470W_A	CR_02470W_A	CR_02470W_A	Ca22chrRA_C_albicans_SC5314:547328-547457	RT_Controls	37_Treated	OK	5674.51	34390.1	2.59942	67.9528	0.0001	0.0888143	Yes
CR_07680C_A	CR_07680C_A	CR_07680C_A	CR_07680C_A	Ca22chrRA_C_albicans_SC5314:1665029-1667474	RT_Controls	37_Treated	OK	1.15088	6.79342	2.5614	2.36329	0.00685	0.803518	Yes
CR_06130C_A	CR_06130C_A	CR_06130C_A	CR_06130C_A	Ca22chrRA_C_albicans_SC5314:1315839-1316193	RT_Controls	37_Treated	OK	0.146889	0.84755	2.52857	2.33523	0.2551	0.99995	No
C4_00530C_A	C4_00530C_A	C4_00530C_A	C4_00530C_A	Ca22chr4A_C_albicans_SC5314:91404-92481	RT_Controls	37_Treated	OK	1.11276	6.3046	2.50227	1.97598	0.0404	0.99995	Yes
C2_02610C_A	C2_02610C_A	C2_02610C_A	HGT20	Ca22chr2A_C_albicans_SC5314:526809-528321	RT_Controls	37_Treated	OK	3.16725	17.896	2.49833	2.44845	0.0051	0.669523	Yes
C2_05310C_A	C2_05310C_A	C2_05310C_A	C2_05310C_A	Ca22chr2A_C_albicans_SC5314:1091742-1092969	RT_Controls	37_Treated	OK	41.8179	234.751	2.48894	0.00711678	0.04645	0.99995	Yes
C2_00680C_A	C2_00680C_A	C2_00680C_A	SOD5	Ca22chr2A_C_albicans_SC5314:111313-112000	RT_Controls	37_Treated	OK	8.653	47.9113	2.46909	3.1751	0.0036	0.597788	Yes
C3_03570C_A	C3_03570C_A	C3_03570C_A	C3_03570C_A	Ca22chr3A_C_albicans_SC5314:757463-758735	RT_Controls	37_Treated	OK	0.338377	1.86702	2.46403	2.01778	0.0315	0.99995	Yes
C4_00990W_A	C4_00990W_A	C4_00990W_A	C4_00990W_A	Ca22chr4A_C_albicans_SC5314:195173-196907	RT_Controls	37_Treated	OK	3.02174	16.5261	2.4513	2.43482	0.00895	0.991504	Yes
C3_02650W_A	C3_02650W_A	C3_02650W_A	C3_02650W_A	Ca22chr3A_C_albicans_SC5314:572851-573178	RT_Controls	37_Treated	OK	2.4145	12.9021	2.41781	3.80003	0.073	0.99995	Yes
C4_03480C_A	C4_03480C_A	C4_03480C_A	C4_03480C_A	Ca22chr4A_C_albicans_SC5314:730526-731114	RT_Controls	37_Treated	NOTEST	0.0288053	0.151633	2.39618	0	1	1	No
CR_06610W_A	CR_06610W_A	CR_06610W_A	STE2	Ca22chrRA_C_albicans_SC5314:1418648-1420058	RT_Controls	37_Treated	OK	0.448295	2.34566	2.38748	1.97268	0.03535	0.99995	Yes
C2_10150W_A	C2_10150W_A	C2_10150W_A	C2_10150W_A	Ca22chr2A_C_albicans_SC5314:2084375-2085581	RT_Controls	37_Treated	OK	1.29704	6.54689	2.33559	2.04749	0.03125	0.99995	Yes
C1_06370C_A	C1_06370C_A	C1_06370C_A	PBR1	Ca22chr1A_C_albicans_SC5314:1356732-1357260	RT_Controls	37_Treated	OK	1.47308	7.43488	2.33548	2.68717	0.03495	0.99995	Yes
C6_01070C_A	C6_01070C_A	C6_01070C_A	CIP1	Ca22chr6A_C_albicans_SC5314:209409-210309	RT_Controls	37_Treated	OK	7.20298	36.31	2.3337	2.59256	0.01415	0.99995	Yes
C1_00850W_A	C1_00850W_A	C1_00850W_A	IHD2	Ca22chr1A_C_albicans_SC5314:167076-167823	RT_Controls	37_Treated	OK	13.4669	66.8341	2.31117	3.08785	0.0042	0.600506	Yes
C1_14630C_A	C1_14630C_A	C1_14630C_A	C1_14630C_A	Ca22chr1A_C_albicans_SC5314:3187659-3188340	RT_Controls	37_Treated	OK	3.07989	15.0998	2.29358	2.41796	0.03015	0.99995	Yes
C2_04910W_A	C2_04910W_A	C2_04910W_A	C2_04910W_A	Ca22chr2A_C_albicans_SC5314:1026160-1026466	RT_Controls	37_Treated	OK	1.49455	7.27455	2.28314	3.84589	0.09925	0.99995	Yes
C1_12000C_A	C1_12000C_A	C1_12000C_A	C1_12000C_A	Ca22chr1A_C_albicans_SC5314:2624648-2626028	RT_Controls	37_Treated	OK	0.550283	2.678	2.28291	1.94343	0.0349	0.99995	Yes
C3_01050C_A	C3_01050C_A	C3_01050C_A	C3_01050C_A	Ca22chr3A_C_albicans_SC5314:213597-215352	RT_Controls	37_Treated	LOWDATA	0.229057	1.10633	2.272	0	1	1	No
C2_03120W_A	C2_03120W_A	C2_03120W_A	AMO1	Ca22chr2A_C_albicans_SC5314:630695-632825	RT_Controls	37_Treated	OK	4.70258	22.5008	2.25846	2.28472	0.0055	0.669523	Yes
C1_06140C_A	C1_06140C_A	C1_06140C_A	C1_06140C_A	Ca22chr1A_C_albicans_SC5314:1286025-1286367	RT_Controls	37_Treated	OK	3.01942	14.3914	2.25286	3.78179	0.0474	0.99995	Yes
C1_07160C_A	C1_07160C_A	C1_07160C_A	C1_07160C_A	Ca22chr1A_C_albicans_SC5314:1535147-1535354	RT_Controls	37_Treated	OK	1544.7	7351.5	2.25071	10.7615	0.0321	0.99995	Yes
C7_00180W_A	C7_00180W_A	C7_00180W_A	FAR1	Ca22chr7A_C_albicans_SC5314:23535-25842	RT_Controls	37_Treated	OK	0.864249	4.10933	2.24938	1.75752	0.04145	0.99995	Yes
CR_02900W_A	CR_02900W_A	CR_02900W_A	CR_02900W_A	Ca22chrRA_C_albicans_SC5314:661102-661894	RT_Controls	37_Treated	OK	0.474185	2.25187	2.2476	1.83417	0.087	0.99995	Yes
C2_07570W_A	C2_07570W_A	C2_07570W_A	RNR22	Ca22chr2A_C_albicans_SC5314:1545973-1547158	RT_Controls	37_Treated	OK	39.2689	183.153	2.22159	2.37401	0.0096	0.99472	Yes
C4_00130W_A	C4_00130W_A	C4_00130W_A	RBT5	Ca22chr4A_C_albicans_SC5314:19712-20438	RT_Controls	37_Treated	OK	538.176	2500.68	2.21617	2.09727	0.05065	0.99995	Yes
C3_04060C_A	C3_04060C_A	C3_04060C_A	HEM13	Ca22chr3A_C_albicans_SC5314:846208-847180	RT_Controls	37_Treated	OK	266.494	1237.44	2.21519	2.08787	0.0378	0.99995	Yes
C6_02510C_A	C6_02510C_A	C6_02510C_A	ASG7	Ca22chr6A_C_albicans_SC5314:519239-519686	RT_Controls	37_Treated	OK	0.201209	0.925771	2.20196	2.18628	0.1505	0.99995	No
C1_05520W_A	C1_05520W_A	C1_05520W_A	C1_05520W_A	Ca22chr1A_C_albicans_SC5314:1158879-1160955	RT_Controls	37_Treated	OK	6.44024	28.9436	2.16805	2.53591	0.0025	0.502846	Yes
C7_02600C_A	C7_02600C_A	C7_02600C_A	C7_02600C_A	Ca22chr7A_C_albicans_SC5314:554232-558933	RT_Controls	37_Treated	OK	14.9831	66.9364	2.15946	1.89186	0.01815	0.99995	Yes
CM_00250W	CM_00250W	CM_00250W	CM_00250W	Ca22chrM_C_albicans_SC5314:14770-20926	RT_Controls	37_Treated	NOTEST	0.016404	0.0727644	2.14919	0	1	1	No
C1_09900W_A	C1_09900W_A	C1_09900W_A	LIP3	Ca22chr1A_C_albicans_SC5314:2166007-2167423	RT_Controls	37_Treated	OK	0.467707	2.0664	2.14344	1.62718	0.0718	0.99995	Yes
C1_12020W_A	C1_12020W_A	C1_12020W_A	C1_12020W_A	Ca22chr1A_C_albicans_SC5314:2631950-2632376	RT_Controls	37_Treated	OK	0.270082	1.18596	2.13459	2.36282	0.12375	0.99995	No
C4_06150C_A	C4_06150C_A	C4_06150C_A	C4_06150C_A	Ca22chr4A_C_albicans_SC5314:1378115-1378936	RT_Controls	37_Treated	OK	0.39776	1.73987	2.12901	2.06189	0.08085	0.99995	Yes
C7_01530W_A	C7_01530W_A	C7_01530W_A	C7_01530W_A	Ca22chr7A_C_albicans_SC5314:322902-323229	RT_Controls	37_Treated	OK	0.196085	0.857502	2.12866	2.4487	0.205	0.99995	No
C1_00270W_A	C1_00270W_A	C1_00270W_A	C1_00270W_A	Ca22chr1A_C_albicans_SC5314:42604-43504	RT_Controls	37_Treated	OK	0.966753	4.21032	2.12271	1.82448	0.0675	0.99995	Yes
C2_02940W_A	C2_02940W_A	C2_02940W_A	MET1	Ca22chr2A_C_albicans_SC5314:586141-587827	RT_Controls	37_Treated	OK	29.5391	126.756	2.10135	2.42367	0.0022	0.488479	Yes
C3_03230C_A	C3_03230C_A	C3_03230C_A	C3_03230C_A	Ca22chr3A_C_albicans_SC5314:681407-683057	RT_Controls	37_Treated	OK	7.11229	30.182	2.0853	2.45977	0.00345	0.595796	Yes
CR_01640C_A	CR_01640C_A	CR_01640C_A	CR_01640C_A	Ca22chrRA_C_albicans_SC5314:374211-375279	RT_Controls	37_Treated	OK	2.96431	12.5705	2.08427	2.14661	0.0216	0.99995	Yes
C2_09220W_A	C2_09220W_A	C2_09220W_A	DDR48	Ca22chr2A_C_albicans_SC5314:1889868-1890507	RT_Controls	37_Treated	OK	388.781	1645.58	2.08157	2.3333	0.03745	0.99995	Yes
C1_02590C_A	C1_02590C_A	C1_02590C_A	SNZ1	Ca22chr1A_C_albicans_SC5314:541721-542600	RT_Controls	37_Treated	OK	169.799	714.568	2.07324	2.334	0.0163	0.99995	Yes
C4_00110C_A	C4_00110C_A	C4_00110C_A	FRP1	Ca22chr4A_C_albicans_SC5314:15791-17456	RT_Controls	37_Treated	OK	16.4466	68.3475	2.0551	2.05114	0.0153	0.99995	Yes
C1_11180C_A	C1_11180C_A	C1_11180C_A	C1_11180C_A	Ca22chr1A_C_albicans_SC5314:2454369-2454459	RT_Controls	37_Treated	OK	22.6199	93.7634	2.05143	71.6162	0.2451	0.99995	No
C7_02250W_A	C7_02250W_A	C7_02250W_A	C7_02250W_A	Ca22chr7A_C_albicans_SC5314:489298-491008	RT_Controls	37_Treated	NOTEST	0.0367153	0.151476	2.04464	0	1	1	No
CR_07540C_A	CR_07540C_A	CR_07540C_A	CR_07540C_A	Ca22chrRA_C_albicans_SC5314:1634659-1636483	RT_Controls	37_Treated	OK	0.169558	0.698147	2.04175	1.392	0.1158	0.99995	No
C3_05660C_A	C3_05660C_A	C3_05660C_A	C3_05660C_A	Ca22chr3A_C_albicans_SC5314:1266050-1267238	RT_Controls	37_Treated	OK	0.0969835	0.39876	2.03971	1.5554	0.1046	0.99995	No
CR_07070C_A	CR_07070C_A	CR_07070C_A	ALS3	Ca22chrRA_C_albicans_SC5314:1532276-1535744	RT_Controls	37_Treated	OK	17.9015	72.6154	2.02019	2.23783	0.00475	0.641973	Yes
C1_05920W_A	C1_05920W_A	C1_05920W_A	C1_05920W_A	Ca22chr1A_C_albicans_SC5314:1236304-1238380	RT_Controls	37_Treated	OK	4.5579	18.4272	2.01539	1.98316	0.01625	0.99995	Yes
C5_03810C_A	C5_03810C_A	C5_03810C_A	C5_03810C_A	Ca22chr5A_C_albicans_SC5314:839330-840098	RT_Controls	37_Treated	OK	17.5102	70.7561	2.01466	2.80214	0.0056	0.669523	Yes
C2_06590C_A	C2_06590C_A	C2_06590C_A	GIT1	Ca22chr2A_C_albicans_SC5314:1334164-1335724	RT_Controls	37_Treated	OK	10.7225	43.195	2.01023	2.19665	0.0124	0.99995	Yes
C7_02610C_A	C7_02610C_A	C7_02610C_A	C7_02610C_A	Ca22chr7A_C_albicans_SC5314:558963-559916	RT_Controls	37_Treated	OK	119.24	479.954	2.00903	2.2903	0.0212	0.99995	Yes
CR_07220C_A	CR_07220C_A	CR_07220C_A	CR_07220C_A	Ca22chrRA_C_albicans_SC5314:1571687-1574810	RT_Controls	37_Treated	OK	2.44252	9.75335	1.99753	2.02073	0.0119	0.99995	Yes
C4_02190C_A	C4_02190C_A	C4_02190C_A	C4_02190C_A	Ca22chr4A_C_albicans_SC5314:435120-436770	RT_Controls	37_Treated	OK	0.188359	0.75005	1.9935	1.46301	0.0971	0.99995	Yes
C4_00120W_A	C4_00120W_A	C4_00120W_A	PGA7	Ca22chr4A_C_albicans_SC5314:17802-18462	RT_Controls	37_Treated	OK	106.549	419.78	1.97812	2.41109	0.0237	0.99995	Yes
C1_03880C_A	C1_03880C_A	C1_03880C_A	C1_03880C_A	Ca22chr1A_C_albicans_SC5314:820901-821264	RT_Controls	37_Treated	NOTEST	0.0839442	0.330325	1.97639	0	1	1	No
CR_02750C_A	CR_02750C_A	CR_02750C_A	PGA34	Ca22chrRA_C_albicans_SC5314:630052-630646	RT_Controls	37_Treated	OK	2.21957	8.62035	1.95747	1.88398	0.10215	0.99995	No
C2_06170C_A	C2_06170C_A	C2_06170C_A	ECM17	Ca22chr2A_C_albicans_SC5314:1255582-1259896	RT_Controls	37_Treated	OK	29.7623	115.156	1.95204	2.02238	0.01055	0.99995	Yes
C4_01800W_A	C4_01800W_A	C4_01800W_A	C4_01800W_A	Ca22chr4A_C_albicans_SC5314:356482-357208	RT_Controls	37_Treated	OK	5.19608	20.0424	1.94756	2.28518	0.0268	0.99995	Yes
C5_04460C_A	C5_04460C_A	C5_04460C_A	C5_04460C_A	Ca22chr5A_C_albicans_SC5314:979413-979596	RT_Controls	37_Treated	OK	1.74631	6.71016	1.94204	8.17326	0.26065	0.99995	No
C7_00630C_A	C7_00630C_A	C7_00630C_A	C7_00630C_A	Ca22chr7A_C_albicans_SC5314:103976-105816	RT_Controls	37_Treated	OK	4.05371	15.5486	1.93946	2.01506	0.0177	0.99995	Yes
C6_01180C_A	C6_01180C_A	C6_01180C_A	EBP1	Ca22chr6A_C_albicans_SC5314:229416-230640	RT_Controls	37_Treated	OK	33.2976	127.668	1.93891	2.41799	0.0055	0.669523	Yes
C2_09140C_A	C2_09140C_A	C2_09140C_A	MET10	Ca22chr2A_C_albicans_SC5314:1872611-1875896	RT_Controls	37_Treated	OK	32.5046	124.403	1.9363	2.08765	0.00835	0.943854	Yes
C1_01740W_A	C1_01740W_A	C1_01740W_A	CTN1	Ca22chr1A_C_albicans_SC5314:357078-359466	RT_Controls	37_Treated	OK	19.368	73.3723	1.92156	1.56465	0.05455	0.99995	Yes
C4_05250W_A	C4_05250W_A	C4_05250W_A	C4_05250W_A	Ca22chr4A_C_albicans_SC5314:1139060-1139768	RT_Controls	37_Treated	OK	17.0949	64.7009	1.92022	2.666	0.01175	0.99995	Yes
C5_00530W_A	C5_00530W_A	C5_00530W_A	C5_00530W_A	Ca22chr5A_C_albicans_SC5314:105625-107950	RT_Controls	37_Treated	OK	0.0710597	0.268462	1.91761	1.34634	0.11865	0.99995	No
C5_00870C_A	C5_00870C_A	C5_00870C_A	GIT4	Ca22chr5A_C_albicans_SC5314:199538-201137	RT_Controls	37_Treated	OK	0.912424	3.42703	1.90918	1.51194	0.0799	0.99995	Yes
C1_13480W_A	C1_13480W_A	C1_13480W_A	HSP70	Ca22chr1A_C_albicans_SC5314:2955557-2957528	RT_Controls	37_Treated	OK	284.556	1063.47	1.90199	1.48486	0.07605	0.99995	Yes
C1_12940C_A	C1_12940C_A	C1_12940C_A	C1_12940C_A	Ca22chr1A_C_albicans_SC5314:2815279-2815492	RT_Controls	37_Treated	OK	6.31462	23.0701	1.86925	7.39713	0.1193	0.99995	No
CR_04970C_A	CR_04970C_A	CR_04970C_A	CR_04970C_A	Ca22chrRA_C_albicans_SC5314:1075493-1076363	RT_Controls	37_Treated	OK	0.403652	1.47417	1.86872	1.71136	0.08485	0.99995	Yes
C3_02950C_A	C3_02950C_A	C3_02950C_A	MET13	Ca22chr3A_C_albicans_SC5314:628091-629936	RT_Controls	37_Treated	OK	17.075	62.0065	1.86053	2.31223	0.00545	0.669523	Yes
CR_01630C_A	CR_01630C_A	CR_01630C_A	CR_01630C_A	Ca22chrRA_C_albicans_SC5314:372033-373998	RT_Controls	37_Treated	OK	3.19914	11.5399	1.85087	1.90141	0.02425	0.99995	Yes
CR_06670W_A	CR_06670W_A	CR_06670W_A	CFL11	Ca22chrRA_C_albicans_SC5314:1433877-1436097	RT_Controls	37_Treated	OK	0.337441	1.21516	1.84844	1.44909	0.0813	0.99995	Yes
CR_00020W_A	CR_00020W_A	CR_00020W_A	TLO1	Ca22chrRA_C_albicans_SC5314:9110-9863	RT_Controls	37_Treated	OK	10.4436	37.4993	1.84425	2.30485	0.0255	0.99995	Yes
C2_06550W_A	C2_06550W_A	C2_06550W_A	C2_06550W_A	Ca22chr2A_C_albicans_SC5314:1330845-1331601	RT_Controls	37_Treated	OK	10.1554	36.2612	1.83618	2.2381	0.02895	0.99995	Yes
C3_04450C_A	C3_04450C_A	C3_04450C_A	C3_04450C_A	Ca22chr3A_C_albicans_SC5314:925624-926464	RT_Controls	37_Treated	OK	0.878476	3.12302	1.82987	1.6117	0.10685	0.99995	No
C6_04200C_A	C6_04200C_A	C6_04200C_A	C6_04200C_A	Ca22chr6A_C_albicans_SC5314:926946-927099	RT_Controls	37_Treated	OK	1319.66	4664.24	1.82147	25.0701	0.02095	0.99995	Yes
C3_07510C_A	C3_07510C_A	C3_07510C_A	SNR52	Ca22chr3A_C_albicans_SC5314:1714799-1714923	RT_Controls	37_Treated	OK	40.9192	144.551	1.82073	33.6849	0.1125	0.99995	No
C2_00660C_A	C2_00660C_A	C2_00660C_A	SOD4	Ca22chr2A_C_albicans_SC5314:108665-109364	RT_Controls	37_Treated	OK	20.5353	72.538	1.82063	2.43494	0.0226	0.99995	Yes
C3_01230C_A	C3_01230C_A	C3_01230C_A	C3_01230C_A	Ca22chr3A_C_albicans_SC5314:260833-261466	RT_Controls	37_Treated	OK	3.5198	12.3227	1.80775	1.90918	0.0856	0.99995	Yes
C5_02630C_A	C5_02630C_A	C5_02630C_A	MNN1	Ca22chr5A_C_albicans_SC5314:589399-591802	RT_Controls	37_Treated	OK	25.0948	87.7737	1.8064	1.76743	0.03065	0.99995	Yes
C4_04030W_A	C4_04030W_A	C4_04030W_A	JEN2	Ca22chr4A_C_albicans_SC5314:864732-866274	RT_Controls	37_Treated	OK	34.3542	119.714	1.80103	1.52895	0.07135	0.99995	Yes
C2_04440W_A	C2_04440W_A	C2_04440W_A	C2_04440W_A	Ca22chr2A_C_albicans_SC5314:928956-929604	RT_Controls	37_Treated	OK	1.74867	6.0917	1.80059	1.96122	0.0751	0.99995	Yes
C7_03300C_A	C7_03300C_A	C7_03300C_A	LIP8	Ca22chr7A_C_albicans_SC5314:727463-728846	RT_Controls	37_Treated	OK	7.16543	24.9297	1.79874	1.96008	0.0221	0.99995	Yes
C3_02330C_A	C3_02330C_A	C3_02330C_A	C3_02330C_A	Ca22chr3A_C_albicans_SC5314:509668-510601	RT_Controls	37_Treated	OK	2.05791	7.14597	1.79595	1.84021	0.056	0.99995	Yes
CR_00500C_A	CR_00500C_A	CR_00500C_A	CR_00500C_A	Ca22chrRA_C_albicans_SC5314:120696-120831	RT_Controls	37_Treated	OK	12.5303	43.2417	1.78701	21.6016	0.20565	0.99995	No
C6_00840W_A	C6_00840W_A	C6_00840W_A	GPX2	Ca22chr6A_C_albicans_SC5314:165019-165511	RT_Controls	37_Treated	OK	140.178	483.573	1.78647	3.12553	0.01235	0.99995	Yes
C1_00030C_A	C1_00030C_A	C1_00030C_A	C1_00030C_A	Ca22chr1A_C_albicans_SC5314:8596-8908	RT_Controls	37_Treated	OK	2.10897	7.25963	1.78336	3.45435	0.1047	0.99995	No
C5_02460C_A	C5_02460C_A	C5_02460C_A	ECM331	Ca22chr5A_C_albicans_SC5314:541500-542742	RT_Controls	37_Treated	OK	33.8423	115.846	1.77531	2.25492	0.0109	0.99995	Yes
CR_06510W_A	CR_06510W_A	CR_06510W_A	CR_06510W_A	Ca22chrRA_C_albicans_SC5314:1390613-1391096	RT_Controls	37_Treated	OK	34.4229	117.677	1.7734	2.94539	0.02345	0.99995	Yes
C4_03760W_A	C4_03760W_A	C4_03760W_A	C4_03760W_A	Ca22chr4A_C_albicans_SC5314:798717-799368	RT_Controls	37_Treated	OK	0.679684	2.31639	1.76894	1.72967	0.1189	0.99995	No
C5_01070C_A	C5_01070C_A	C5_01070C_A	C5_01070C_A	Ca22chr5A_C_albicans_SC5314:225951-227454	RT_Controls	37_Treated	OK	37.9699	129.119	1.76578	2.00583	0.0197	0.99995	Yes
C6_04620C_A	C6_04620C_A	C6_04620C_A	NAG4	Ca22chr6A_C_albicans_SC5314:1025129-1026875	RT_Controls	37_Treated	OK	0.235858	0.801168	1.76419	1.38102	0.1095	0.99995	No
C1_02250W_A	C1_02250W_A	C1_02250W_A	CWH8	Ca22chr1A_C_albicans_SC5314:474918-475644	RT_Controls	37_Treated	OK	63.3122	214.503	1.76045	2.45306	0.01715	0.99995	Yes
C1_10060C_A	C1_10060C_A	C1_10060C_A	C1_10060C_A	Ca22chr1A_C_albicans_SC5314:2203459-2203972	RT_Controls	37_Treated	OK	21.0254	70.564	1.7468	2.24434	0.0667	0.99995	Yes
C4_05950C_A	C4_05950C_A	C4_05950C_A	tT%28UGU%292	Ca22chr4A_C_albicans_SC5314:1324903-1324975	RT_Controls	37_Treated	OK	42.91	143.241	1.73905	137.975	0.39785	0.99995	No
C1_11320C_A	C1_11320C_A	C1_11320C_A	C1_11320C_A	Ca22chr1A_C_albicans_SC5314:2485115-2485428	RT_Controls	37_Treated	OK	519.815	1729.31	1.73413	7.18252	0.0556	0.99995	Yes
CR_00090C_A	CR_00090C_A	CR_00090C_A	CR_00090C_A	Ca22chrRA_C_albicans_SC5314:24473-25163	RT_Controls	37_Treated	OK	57.9192	192.509	1.73281	2.5459	0.01455	0.99995	Yes
C2_06570C_A	C2_06570C_A	C2_06570C_A	C2_06570C_A	Ca22chr2A_C_albicans_SC5314:1332505-1332811	RT_Controls	37_Treated	OK	1875.89	6169.56	1.71759	3.83596	0.072	0.99995	Yes
C1_11260C_A	C1_11260C_A	C1_11260C_A	C1_11260C_A	Ca22chr1A_C_albicans_SC5314:2473803-2473941	RT_Controls	37_Treated	OK	82.2829	266.984	1.69809	22.8065	0.1304	0.99995	No
CR_07790C_A	CR_07790C_A	CR_07790C_A	YHB1	Ca22chrRA_C_albicans_SC5314:1686912-1688109	RT_Controls	37_Treated	OK	150.423	484.32	1.68693	1.59607	0.07115	0.99995	Yes
C1_06870C_A	C1_06870C_A	C1_06870C_A	C1_06870C_A	Ca22chr1A_C_albicans_SC5314:1464433-1464637	RT_Controls	37_Treated	OK	369.276	1186.67	1.68415	12.0057	0.015	0.99995	Yes
C4_05880W_A	C4_05880W_A	C4_05880W_A	GAT1	Ca22chr4A_C_albicans_SC5314:1301848-1303915	RT_Controls	37_Treated	OK	6.62004	21.2693	1.68386	1.9558	0.01485	0.99995	Yes
C3_06330W_A	C3_06330W_A	C3_06330W_A	TSA1B	Ca22chr3A_C_albicans_SC5314:1452362-1452953	RT_Controls	37_Treated	NOTEST	0.0977356	0.313273	1.68046	0	1	1	No
C2_00980W_A	C2_00980W_A	C2_00980W_A	C2_00980W_A	Ca22chr2A_C_albicans_SC5314:161334-161679	RT_Controls	37_Treated	OK	0.266608	0.849001	1.67105	2.10568	0.26255	0.99995	No
C3_04190W_A	C3_04190W_A	C3_04190W_A	C3_04190W_A	Ca22chr3A_C_albicans_SC5314:872064-872355	RT_Controls	37_Treated	OK	41.4724	131.218	1.66174	4.75781	0.04315	0.99995	Yes
C4_01530C_A	C4_01530C_A	C4_01530C_A	ERG251	Ca22chr4A_C_albicans_SC5314:317139-318105	RT_Controls	37_Treated	OK	128.715	406.907	1.66051	1.89676	0.0407	0.99995	Yes
C7_01380W_A	C7_01380W_A	C7_01380W_A	C7_01380W_A	Ca22chr7A_C_albicans_SC5314:281374-282502	RT_Controls	37_Treated	OK	2.73361	8.62224	1.65725	1.71015	0.06025	0.99995	Yes
C7_01730C_A	C7_01730C_A	C7_01730C_A	STE18	Ca22chr7A_C_albicans_SC5314:373997-374338	RT_Controls	37_Treated	OK	18.128	56.9431	1.6513	4.60265	0.0844	0.99995	Yes
C6_00860W_A	C6_00860W_A	C6_00860W_A	GPX1	Ca22chr6A_C_albicans_SC5314:169117-169807	RT_Controls	37_Treated	OK	7.73645	24.2991	1.65116	2.03598	0.053	0.99995	Yes
CR_01430W_A	CR_01430W_A	CR_01430W_A	CR_01430W_A	Ca22chrRA_C_albicans_SC5314:337257-337875	RT_Controls	37_Treated	OK	52.0331	163.311	1.65012	2.68239	0.01435	0.99995	Yes
C2_05070W_A	C2_05070W_A	C2_05070W_A	FRE9	Ca22chr2A_C_albicans_SC5314:1049140-1051390	RT_Controls	37_Treated	OK	4.02135	12.5814	1.64554	1.55481	0.0559	0.99995	Yes
CR_00970W_A	CR_00970W_A	CR_00970W_A	ATO9	Ca22chrRA_C_albicans_SC5314:215620-216148	RT_Controls	37_Treated	OK	12.9131	40.3659	1.6443	2.37612	0.04285	0.99995	Yes
C7_01130C_A	C7_01130C_A	C7_01130C_A	C7_01130C_A	Ca22chr7A_C_albicans_SC5314:236121-236562	RT_Controls	37_Treated	OK	0.149834	0.467953	1.643	1.50872	0.2711	0.99995	No
C4_05560C_A	C4_05560C_A	C4_05560C_A	ARO9	Ca22chr4A_C_albicans_SC5314:1213410-1214982	RT_Controls	37_Treated	OK	9.47727	29.5536	1.64079	1.97448	0.0191	0.99995	Yes
C7_03170W_A	C7_03170W_A	C7_03170W_A	IFA21	Ca22chr7A_C_albicans_SC5314:687920-690194	RT_Controls	37_Treated	OK	5.92877	18.3218	1.62776	1.83673	0.01965	0.99995	Yes
C2_08055W_A	C2_08055W_A	C2_08055W_A	RPR1	Ca22chr2A_C_albicans_SC5314:1637751-1638088	RT_Controls	37_Treated	OK	12.969	40.0128	1.6254	3.34578	0.07305	0.99995	Yes
C2_01540W_A	C2_01540W_A	C2_01540W_A	C2_01540W_A	Ca22chr2A_C_albicans_SC5314:275531-276701	RT_Controls	37_Treated	OK	15.0641	46.4379	1.62418	2.04234	0.0198	0.99995	Yes
C4_03520C_A	C4_03520C_A	C4_03520C_A	RBT1	Ca22chr4A_C_albicans_SC5314:745165-747331	RT_Controls	37_Treated	OK	3.42936	10.5247	1.61777	1.69509	0.0383	0.99995	Yes
CR_01860W_A	CR_01860W_A	CR_01860W_A	OPT9	Ca22chrRA_C_albicans_SC5314:417901-418700	RT_Controls	37_Treated	OK	0.231884	0.709923	1.61426	1.35915	0.1987	0.99995	No
C1_08350C_A	C1_08350C_A	C1_08350C_A	C1_08350C_A	Ca22chr1A_C_albicans_SC5314:1832849-1833041	RT_Controls	37_Treated	OK	7240.1	22083.7	1.6089	8.95594	0.13045	0.99995	No
C2_09410W_A	C2_09410W_A	C2_09410W_A	C2_09410W_A	Ca22chr2A_C_albicans_SC5314:1917971-1918328	RT_Controls	37_Treated	OK	0.739065	2.2498	1.60602	2.26058	0.2079	0.99995	No
C2_00670C_A	C2_00670C_A	C2_00670C_A	C2_00670C_A	Ca22chr2A_C_albicans_SC5314:110754-111075	RT_Controls	37_Treated	NOTEST	0.18589	0.563013	1.59872	0	1	1	No
C2_08150W_A	C2_08150W_A	C2_08150W_A	C2_08150W_A	Ca22chr2A_C_albicans_SC5314:1654157-1654853	RT_Controls	37_Treated	OK	0.338305	1.01827	1.58972	1.32098	0.22165	0.99995	No
C1_12930C_A	C1_12930C_A	C1_12930C_A	C1_12930C_A	Ca22chr1A_C_albicans_SC5314:2813598-2815155	RT_Controls	37_Treated	OK	2.38327	7.17264	1.58956	1.52971	0.06875	0.99995	Yes
C4_04380C_A	C4_04380C_A	C4_04380C_A	C4_04380C_A	Ca22chr4A_C_albicans_SC5314:935017-935302	RT_Controls	37_Treated	OK	37.5537	112.624	1.58448	4.59721	0.05635	0.99995	Yes
C7_01060W_A	C7_01060W_A	C7_01060W_A	C7_01060W_A	Ca22chr7A_C_albicans_SC5314:222725-223154	RT_Controls	37_Treated	OK	0.344198	1.03186	1.58393	1.55239	0.3053	0.99995	No
CR_04275W_A	CR_04275W_A	CR_04275W_A	SCR1	Ca22chrRA_C_albicans_SC5314:955227-955492	RT_Controls	37_Treated	OK	83.6517	250.343	1.58144	5.66516	0.0396	0.99995	Yes
CR_02180W_A	CR_02180W_A	CR_02180W_A	PHO113	Ca22chrRA_C_albicans_SC5314:478026-479415	RT_Controls	37_Treated	OK	8.16164	24.302	1.57415	1.84991	0.03195	0.99995	Yes
C5_04220W_A	C5_04220W_A	C5_04220W_A	MRV5	Ca22chr5A_C_albicans_SC5314:939281-939923	RT_Controls	37_Treated	OK	0.391849	1.16354	1.57015	1.23092	0.2826	0.99995	No
C1_10800C_A	C1_10800C_A	C1_10800C_A	ALP1	Ca22chr1A_C_albicans_SC5314:2393471-2395103	RT_Controls	37_Treated	OK	74.0611	219.615	1.56819	1.80186	0.0289	0.99995	Yes
C1_09190C_A	C1_09190C_A	C1_09190C_A	DAK2	Ca22chr1A_C_albicans_SC5314:2017548-2019336	RT_Controls	37_Treated	OK	87.4361	258.501	1.56387	1.45289	0.0834	0.99995	Yes
C1_05300C_A	C1_05300C_A	C1_05300C_A	PRD1	Ca22chr1A_C_albicans_SC5314:1113319-1115428	RT_Controls	37_Treated	OK	32.9252	97.3338	1.56375	1.50946	0.0659	0.99995	Yes
C2_06350C_A	C2_06350C_A	C2_06350C_A	C2_06350C_A	Ca22chr2A_C_albicans_SC5314:1297756-1299199	RT_Controls	37_Treated	OK	0.119777	0.354041	1.56356	1.09568	0.2287	0.99995	No
C2_04450W_A	C2_04450W_A	C2_04450W_A	C2_04450W_A	Ca22chr2A_C_albicans_SC5314:929892-930708	RT_Controls	37_Treated	OK	3.78581	11.1463	1.55788	1.68745	0.08835	0.99995	Yes
CR_06270W_A	CR_06270W_A	CR_06270W_A	CR_06270W_A	Ca22chrRA_C_albicans_SC5314:1334032-1334527	RT_Controls	37_Treated	OK	6.9593	20.454	1.55537	2.15146	0.08075	0.99995	Yes
CR_06550C_A	CR_06550C_A	CR_06550C_A	CR_06550C_A	Ca22chrRA_C_albicans_SC5314:1396674-1397004	RT_Controls	37_Treated	OK	231.426	679.062	1.553	3.79357	0.0471	0.99995	Yes
C7_02920W_A	C7_02920W_A	C7_02920W_A	C7_02920W_A	Ca22chr7A_C_albicans_SC5314:633411-635133	RT_Controls	37_Treated	OK	2.59882	7.60837	1.54973	1.48358	0.0728	0.99995	Yes
C2_08360C_A	C2_08360C_A	C2_08360C_A	OPT5	Ca22chr2A_C_albicans_SC5314:1685484-1688250	RT_Controls	37_Treated	OK	0.157407	0.459466	1.54546	1.11433	0.17345	0.99995	No
C1_09340C_A	C1_09340C_A	C1_09340C_A	C1_09340C_A	Ca22chr1A_C_albicans_SC5314:2055981-2059482	RT_Controls	37_Treated	OK	3.84716	11.2112	1.54307	1.66653	0.0321	0.99995	Yes
CR_10790W_A	CR_10790W_A	CR_10790W_A	MAL2	Ca22chrRA_C_albicans_SC5314:2276744-2278457	RT_Controls	37_Treated	OK	1.85792	5.39778	1.53868	1.47676	0.0734	0.99995	Yes
C2_00760C_A	C2_00760C_A	C2_00760C_A	C2_00760C_A	Ca22chr2A_C_albicans_SC5314:131107-131473	RT_Controls	37_Treated	OK	425.387	1233.76	1.53622	3.02704	0.0686	0.99995	Yes
C3_07330W_A	C3_07330W_A	C3_07330W_A	C3_07330W_A	Ca22chr3A_C_albicans_SC5314:1687596-1688466	RT_Controls	37_Treated	OK	12.1933	35.2606	1.53197	1.9784	0.03785	0.99995	Yes
C2_05360C_A	C2_05360C_A	C2_05360C_A	BIO32	Ca22chr2A_C_albicans_SC5314:1100491-1101952	RT_Controls	37_Treated	OK	4.72334	13.6027	1.52601	1.5587	0.0678	0.99995	Yes
C4_01390W_A	C4_01390W_A	C4_01390W_A	HAP3	Ca22chr4A_C_albicans_SC5314:287624-288733	RT_Controls	37_Treated	OK	3.39244	9.70626	1.51659	1.59291	0.08485	0.99995	Yes
C2_00960C_A	C2_00960C_A	C2_00960C_A	MXR1	Ca22chr2A_C_albicans_SC5314:157847-158405	RT_Controls	37_Treated	OK	164.748	469.478	1.5108	2.58787	0.02415	0.99995	Yes
C1_00290W_A	C1_00290W_A	C1_00290W_A	POL93	Ca22chr1A_C_albicans_SC5314:43802-45764	RT_Controls	37_Treated	OK	4.92233	13.9528	1.50314	1.65344	0.04265	0.99995	Yes
C5_01670W_A	C5_01670W_A	C5_01670W_A	DAL52	Ca22chr5A_C_albicans_SC5314:375461-377102	RT_Controls	37_Treated	OK	0.889618	2.51976	1.50203	1.33307	0.1154	0.99995	No
C5_04210C_A	C5_04210C_A	C5_04210C_A	MRV4	Ca22chr5A_C_albicans_SC5314:937202-937973	RT_Controls	37_Treated	OK	0.191923	0.543066	1.5006	1.16852	0.2728	0.99995	No
C5_05510C_A	C5_05510C_A	C5_05510C_A	C5_05510C_A	Ca22chr5A_C_albicans_SC5314:1188746-1189058	RT_Controls	37_Treated	OK	12.2218	34.5453	1.49904	3.29866	0.11355	0.99995	No
C1_14130W_A	C1_14130W_A	C1_14130W_A	FTR1	Ca22chr1A_C_albicans_SC5314:3113600-3114746	RT_Controls	37_Treated	OK	184.004	517.946	1.49307	1.2214	0.17775	0.99995	No
C5_02690W_A	C5_02690W_A	C5_02690W_A	C5_02690W_A	Ca22chr5A_C_albicans_SC5314:606038-607136	RT_Controls	37_Treated	OK	10.3689	29.1453	1.491	1.71479	0.05505	0.99995	Yes
CR_03190C_A	CR_03190C_A	CR_03190C_A	CR_03190C_A	Ca22chrRA_C_albicans_SC5314:718809-719053	RT_Controls	37_Treated	OK	9.74965	27.3863	1.49003	4.66352	0.1634	0.99995	No
C1_11270W_A	C1_11270W_A	C1_11270W_A	C1_11270W_A	Ca22chr1A_C_albicans_SC5314:2475445-2476084	RT_Controls	37_Treated	OK	262.3	734.752	1.48604	2.14113	0.0441	0.99995	Yes
C2_02220C_A	C2_02220C_A	C2_02220C_A	C2_02220C_A	Ca22chr2A_C_albicans_SC5314:437550-438750	RT_Controls	37_Treated	OK	0.9139	2.55828	1.48507	1.25771	0.1563	0.99995	No
CR_02340W_A	CR_02340W_A	CR_02340W_A	CR_02340W_A	Ca22chrRA_C_albicans_SC5314:518244-519572	RT_Controls	37_Treated	OK	0.204463	0.571066	1.48182	1.20352	0.1848	0.99995	No
C6_00440C_A	C6_00440C_A	C6_00440C_A	FET34	Ca22chr6A_C_albicans_SC5314:76653-78531	RT_Controls	37_Treated	OK	83.9089	234.183	1.48074	1.31128	0.10555	0.99995	No
C1_07900W_A	C1_07900W_A	C1_07900W_A	COI1	Ca22chr1A_C_albicans_SC5314:1722823-1723399	RT_Controls	37_Treated	OK	238.972	666.032	1.47875	2.2205	0.0433	0.99995	Yes
CR_10340W_A	CR_10340W_A	CR_10340W_A	PTP3	Ca22chrRA_C_albicans_SC5314:2206794-2209563	RT_Controls	37_Treated	OK	45.1835	125.852	1.47785	1.42799	0.0708	0.99995	Yes
C1_10300W_A	C1_10300W_A	C1_10300W_A	MNN12	Ca22chr1A_C_albicans_SC5314:2276259-2278746	RT_Controls	37_Treated	OK	10.6698	29.6046	1.47229	1.54166	0.05175	0.99995	Yes
C4_03160C_A	C4_03160C_A	C4_03160C_A	C4_03160C_A	Ca22chr4A_C_albicans_SC5314:664006-665035	RT_Controls	37_Treated	OK	3.95678	10.8016	1.44884	1.51251	0.0974	0.99995	Yes
C1_11340W_A	C1_11340W_A	C1_11340W_A	PRM1	Ca22chr1A_C_albicans_SC5314:2487813-2489685	RT_Controls	37_Treated	OK	0.605675	1.64751	1.44367	1.16981	0.15765	0.99995	No
C3_01270W_A	C3_01270W_A	C3_01270W_A	C3_01270W_A	Ca22chr3A_C_albicans_SC5314:273810-274278	RT_Controls	37_Treated	OK	18.9071	51.2914	1.43979	2.01632	0.12155	0.99995	No
CR_01850C_A	CR_01850C_A	CR_01850C_A	CR_01850C_A	Ca22chrRA_C_albicans_SC5314:417068-417834	RT_Controls	37_Treated	OK	3.66508	9.93077	1.43806	0.807086	0.29005	0.99995	No
C1_11610C_A	C1_11610C_A	C1_11610C_A	C1_11610C_A	Ca22chr1A_C_albicans_SC5314:2548321-2549842	RT_Controls	37_Treated	OK	21.3698	57.5377	1.42893	1.86938	0.0244	0.99995	Yes
C5_00390C_A	C5_00390C_A	C5_00390C_A	C5_00390C_A	Ca22chr5A_C_albicans_SC5314:71612-72101	RT_Controls	37_Treated	OK	61.8697	165.418	1.41881	2.32502	0.06245	0.99995	Yes
C6_03320W_A	C6_03320W_A	C6_03320W_A	C6_03320W_A	Ca22chr6A_C_albicans_SC5314:696247-699883	RT_Controls	37_Treated	OK	76.8617	205.09	1.41592	1.42328	0.151	0.99995	No
CR_01400W_A	CR_01400W_A	CR_01400W_A	LYS12	Ca22chrRA_C_albicans_SC5314:332021-333152	RT_Controls	37_Treated	OK	175.484	467.258	1.41288	1.5112	0.08965	0.99995	Yes
C4_02070W_A	C4_02070W_A	C4_02070W_A	PHO114	Ca22chr4A_C_albicans_SC5314:414416-415787	RT_Controls	37_Treated	OK	5.74113	15.2562	1.40999	1.59259	0.06225	0.99995	Yes
C2_02910W_A	C2_02910W_A	C2_02910W_A	C2_02910W_A	Ca22chr2A_C_albicans_SC5314:581972-582236	RT_Controls	37_Treated	OK	70.0171	186.057	1.40996	4.73892	0.0875	0.99995	Yes
CR_10860C_A	CR_10860C_A	CR_10860C_A	CTA26	Ca22chrRA_C_albicans_SC5314:2285376-2286198	RT_Controls	37_Treated	OK	23.0303	60.9035	1.40299	1.85482	0.053	0.99995	Yes
C4_04000W_A	C4_04000W_A	C4_04000W_A	MET4	Ca22chr4A_C_albicans_SC5314:854021-855179	RT_Controls	37_Treated	OK	22.881	60.3832	1.4	1.89251	0.0302	0.99995	Yes
C1_04930C_A	C1_04930C_A	C1_04930C_A	C1_04930C_A	Ca22chr1A_C_albicans_SC5314:1021666-1022368	RT_Controls	37_Treated	OK	6.38078	16.8335	1.39953	1.64542	0.1088	0.99995	No
CR_04480C_A	CR_04480C_A	CR_04480C_A	LAP3	Ca22chrRA_C_albicans_SC5314:988874-990404	RT_Controls	37_Treated	OK	14.0978	37.1492	1.39786	1.68585	0.0438	0.99995	Yes
C5_01990W_A	C5_01990W_A	C5_01990W_A	C5_01990W_A	Ca22chr5A_C_albicans_SC5314:446198-446600	RT_Controls	37_Treated	OK	1.83448	4.83057	1.39682	1.81541	0.23805	0.99995	No
C3_04840C_A	C3_04840C_A	C3_04840C_A	C3_04840C_A	Ca22chr3A_C_albicans_SC5314:1037258-1038575	RT_Controls	37_Treated	OK	22.7273	59.8385	1.39665	1.65893	0.05175	0.99995	Yes
C1_09410W_A	C1_09410W_A	C1_09410W_A	C1_09410W_A	Ca22chr1A_C_albicans_SC5314:2074851-2075229	RT_Controls	37_Treated	NOTEST	0.127008	0.33429	1.39618	0	1	1	No
C1_08750W_A	C1_08750W_A	C1_08750W_A	YMC2	Ca22chr1A_C_albicans_SC5314:1907473-1908382	RT_Controls	37_Treated	OK	32.6004	85.8025	1.39613	1.98269	0.0314	0.99995	Yes
C1_12720C_A	C1_12720C_A	C1_12720C_A	C1_12720C_A	Ca22chr1A_C_albicans_SC5314:2772372-2772915	RT_Controls	37_Treated	OK	5.75456	15.136	1.39521	1.63829	0.17115	0.99995	No
CR_09270C_A	CR_09270C_A	CR_09270C_A	CBP1	Ca22chrRA_C_albicans_SC5314:1968718-1970188	RT_Controls	37_Treated	OK	83.4429	219.361	1.39444	1.518	0.06905	0.99995	Yes
C2_04460W_A	C2_04460W_A	C2_04460W_A	LYS22	Ca22chr2A_C_albicans_SC5314:931946-933200	RT_Controls	37_Treated	OK	105.661	277.277	1.39188	1.51293	0.08	0.99995	Yes
C2_07710W_A	C2_07710W_A	C2_07710W_A	C2_07710W_A	Ca22chr2A_C_albicans_SC5314:1571236-1572079	RT_Controls	37_Treated	OK	0.187602	0.491737	1.39021	1.11206	0.27455	0.99995	No
C3_06670C_A	C3_06670C_A	C3_06670C_A	C3_06670C_A	Ca22chr3A_C_albicans_SC5314:1523519-1524584	RT_Controls	37_Treated	OK	5.87935	15.3174	1.38145	1.49291	0.0969	0.99995	Yes
CR_02320W_A	CR_02320W_A	CR_02320W_A	CR_02320W_A	Ca22chrRA_C_albicans_SC5314:516593-516683	RT_Controls	37_Treated	OK	90.4795	235.48	1.37994	70.3096	0.2675	0.99995	No
C3_00050C_A	C3_00050C_A	C3_00050C_A	C3_00050C_A	Ca22chr3A_C_albicans_SC5314:12189-12501	RT_Controls	37_Treated	OK	15.0934	39.2669	1.3794	3.10362	0.13105	0.99995	No
C7_02130W_A	C7_02130W_A	C7_02130W_A	C7_02130W_A	Ca22chr7A_C_albicans_SC5314:468120-469158	RT_Controls	37_Treated	NOTEST	0.101168	0.261075	1.3677	0	1	1	No
C3_05620W_A	C3_05620W_A	C3_05620W_A	ATO5	Ca22chr3A_C_albicans_SC5314:1257307-1258150	RT_Controls	37_Treated	OK	0.977356	2.50884	1.36006	1.21708	0.2117	0.99995	No
C5_03050C_A	C5_03050C_A	C5_03050C_A	PGA58	Ca22chr5A_C_albicans_SC5314:676464-677187	RT_Controls	37_Treated	OK	3.85017	9.85208	1.3555	1.52124	0.13195	0.99995	No
C1_05960W_A	C1_05960W_A	C1_05960W_A	PGA45	Ca22chr1A_C_albicans_SC5314:1251549-1252941	RT_Controls	37_Treated	OK	116.621	298.283	1.35486	1.21933	0.14435	0.99995	No
C6_03170C_A	C6_03170C_A	C6_03170C_A	MDR1	Ca22chr6A_C_albicans_SC5314:666382-668077	RT_Controls	37_Treated	OK	4.06261	10.3633	1.351	1.36636	0.0988	0.99995	Yes
CR_03890W_A	CR_03890W_A	CR_03890W_A	WOR3	Ca22chrRA_C_albicans_SC5314:878578-880504	RT_Controls	37_Treated	OK	15.4406	39.3581	1.34993	1.5277	0.05965	0.99995	Yes
CR_00290W_A	CR_00290W_A	CR_00290W_A	CR_00290W_A	Ca22chrRA_C_albicans_SC5314:72119-73049	RT_Controls	37_Treated	OK	170.077	432.195	1.3455	1.47517	0.11385	0.99995	No
C3_07120W_A	C3_07120W_A	C3_07120W_A	C3_07120W_A	Ca22chr3A_C_albicans_SC5314:1632269-1633007	RT_Controls	37_Treated	OK	14.0238	35.6158	1.34463	1.82841	0.0684	0.99995	Yes
CR_01620C_A	CR_01620C_A	CR_01620C_A	MET6	Ca22chrRA_C_albicans_SC5314:368746-371050	RT_Controls	37_Treated	OK	315.895	802.039	1.34423	1.04796	0.18565	0.99995	No
C4_06780C_A	C4_06780C_A	C4_06780C_A	OYE32	Ca22chr4A_C_albicans_SC5314:1511587-1512886	RT_Controls	37_Treated	OK	24.2507	61.2042	1.33561	1.74736	0.04075	0.99995	Yes
CR_00150C_A	CR_00150C_A	CR_00150C_A	POT1	Ca22chrRA_C_albicans_SC5314:39000-40227	RT_Controls	37_Treated	OK	78.2329	197.227	1.33401	1.71071	0.0466	0.99995	Yes
C5_03750W_A	C5_03750W_A	C5_03750W_A	FAV2	Ca22chr5A_C_albicans_SC5314:829496-829922	RT_Controls	37_Treated	OK	39.8777	100.497	1.3335	2.47223	0.0749	0.99995	Yes
C7_02000C_A	C7_02000C_A	C7_02000C_A	C7_02000C_A	Ca22chr7A_C_albicans_SC5314:432210-433887	RT_Controls	37_Treated	OK	0.198712	0.500248	1.33196	1.03229	0.22185	0.99995	No
C3_06860C_A	C3_06860C_A	C3_06860C_A	C3_06860C_A	Ca22chr3A_C_albicans_SC5314:1572461-1573310	RT_Controls	37_Treated	OK	33.1386	83.4021	1.33157	1.71358	0.07125	0.99995	Yes
C4_03340C_A	C4_03340C_A	C4_03340C_A	C4_03340C_A	Ca22chr4A_C_albicans_SC5314:701060-702284	RT_Controls	37_Treated	OK	5.94729	14.9636	1.33116	1.38929	0.11315	0.99995	No
C6_03490C_A	C6_03490C_A	C6_03490C_A	SAP1	Ca22chr6A_C_albicans_SC5314:741927-743103	RT_Controls	37_Treated	OK	8.11846	20.3579	1.32631	1.44975	0.0962	0.99995	Yes
C1_05710C_A	C1_05710C_A	C1_05710C_A	UGA4	Ca22chr1A_C_albicans_SC5314:1192510-1194184	RT_Controls	37_Treated	OK	2.44024	6.10547	1.32308	1.26604	0.1227	0.99995	No
C2_10560C_A	C2_10560C_A	C2_10560C_A	ZSF1	Ca22chr2A_C_albicans_SC5314:2179658-2180270	RT_Controls	37_Treated	OK	184.614	459.551	1.31571	2.00058	0.0623	0.99995	Yes
C7_03580C_A	C7_03580C_A	C7_03580C_A	C7_03580C_A	Ca22chr7A_C_albicans_SC5314:793703-795782	RT_Controls	37_Treated	OK	4.02849	9.95875	1.30573	1.37153	0.08715	0.99995	Yes
C4_03510C_A	C4_03510C_A	C4_03510C_A	HWP2	Ca22chr4A_C_albicans_SC5314:738441-741168	RT_Controls	37_Treated	OK	0.286176	0.706475	1.30374	1.04896	0.187	0.99995	No
C5_01360W_A	C5_01360W_A	C5_01360W_A	CFL4	Ca22chr5A_C_albicans_SC5314:303367-305500	RT_Controls	37_Treated	OK	3.33702	8.18401	1.29425	1.10924	0.1693	0.99995	No
C4_02180C_A	C4_02180C_A	C4_02180C_A	ZCF26	Ca22chr4A_C_albicans_SC5314:432065-434558	RT_Controls	37_Treated	OK	1.73415	4.24314	1.29091	1.18467	0.1314	0.99995	No
C3_04020C_A	C3_04020C_A	C3_04020C_A	ZCF16	Ca22chr3A_C_albicans_SC5314:836182-839419	RT_Controls	37_Treated	OK	7.10688	17.3803	1.29016	1.39906	0.0704	0.99995	Yes
C7_00280W_A	C7_00280W_A	C7_00280W_A	HGT12	Ca22chr7A_C_albicans_SC5314:41586-43167	RT_Controls	37_Treated	OK	0.158034	0.38632	1.28956	0.994791	0.25325	0.99995	No
C3_04200W_A	C3_04200W_A	C3_04200W_A	AFP99	Ca22chr3A_C_albicans_SC5314:872654-873911	RT_Controls	37_Treated	OK	3.04779	7.44333	1.28818	1.30815	0.12845	0.99995	No
C5_00430W_A	C5_00430W_A	C5_00430W_A	MET14	Ca22chr5A_C_albicans_SC5314:78889-79492	RT_Controls	37_Treated	OK	200.096	488.055	1.28635	1.95852	0.07245	0.99995	Yes
C1_04460C_A	C1_04460C_A	C1_04460C_A	C1_04460C_A	Ca22chr1A_C_albicans_SC5314:918744-919554	RT_Controls	37_Treated	OK	26.2069	63.789	1.28336	1.79258	0.06615	0.99995	Yes
C5_05050W_A	C5_05050W_A	C5_05050W_A	ADH1	Ca22chr5A_C_albicans_SC5314:1107879-1108932	RT_Controls	37_Treated	OK	5278.1	12843.8	1.28298	0.520934	0.4687	0.99995	No
C3_06490W_A	C3_06490W_A	C3_06490W_A	C3_06490W_A	Ca22chr3A_C_albicans_SC5314:1481887-1482811	RT_Controls	37_Treated	OK	31.5945	76.8073	1.28157	1.82823	0.0481	0.99995	Yes
C1_06160W_A	C1_06160W_A	C1_06160W_A	C1_06160W_A	Ca22chr1A_C_albicans_SC5314:1289660-1291016	RT_Controls	37_Treated	OK	0.319274	0.776067	1.28139	1.0166	0.243	0.99995	No
C1_10560C_A	C1_10560C_A	C1_10560C_A	C1_10560C_A	Ca22chr1A_C_albicans_SC5314:2337546-2339439	RT_Controls	37_Treated	OK	3.85062	9.34033	1.27838	1.35207	0.0945	0.99995	Yes
C3_05630W_A	C3_05630W_A	C3_05630W_A	GTT1	Ca22chr3A_C_albicans_SC5314:1258946-1259750	RT_Controls	37_Treated	OK	0.314265	0.761651	1.27715	1.09781	0.27605	0.99995	No
C2_02550C_A	C2_02550C_A	C2_02550C_A	C2_02550C_A	Ca22chr2A_C_albicans_SC5314:514895-517007	RT_Controls	37_Treated	OK	1.74918	4.23134	1.27444	1.21887	0.1332	0.99995	No
C7_02830C_A	C7_02830C_A	C7_02830C_A	LIP5	Ca22chr7A_C_albicans_SC5314:609390-610782	RT_Controls	37_Treated	OK	3.83354	9.273	1.27436	1.345	0.11285	0.99995	No
C7_04170W_A	C7_04170W_A	C7_04170W_A	C7_04170W_A	Ca22chr7A_C_albicans_SC5314:898904-899724	RT_Controls	37_Treated	OK	6.85682	16.5746	1.27336	1.53715	0.1168	0.99995	No
C1_13590W_A	C1_13590W_A	C1_13590W_A	C1_13590W_A	Ca22chr1A_C_albicans_SC5314:2984914-2986141	RT_Controls	37_Treated	OK	1.40504	3.39428	1.2725	1.19131	0.17315	0.99995	No
C7_04080C_A	C7_04080C_A	C7_04080C_A	C7_04080C_A	Ca22chr7A_C_albicans_SC5314:885184-885985	RT_Controls	37_Treated	OK	0.163751	0.395456	1.27202	1.04271	0.306	0.99995	No
C2_02850W_A	C2_02850W_A	C2_02850W_A	UGA6	Ca22chr2A_C_albicans_SC5314:570076-571711	RT_Controls	37_Treated	OK	1.16892	2.82057	1.27081	1.0123	0.21825	0.99995	No
C1_00880W_A	C1_00880W_A	C1_00880W_A	C1_00880W_A	Ca22chr1A_C_albicans_SC5314:174458-176084	RT_Controls	37_Treated	OK	3.27197	7.88032	1.26809	1.24057	0.13285	0.99995	No
C4_04320W_A	C4_04320W_A	C4_04320W_A	FRE10	Ca22chr4A_C_albicans_SC5314:923038-925159	RT_Controls	37_Treated	OK	93.7943	225.862	1.26787	1.16145	0.14475	0.99995	No
C1_07380C_A	C1_07380C_A	C1_07380C_A	KSP1	Ca22chr1A_C_albicans_SC5314:1595183-1598036	RT_Controls	37_Treated	OK	5.85656	14.0654	1.26402	1.33177	0.089	0.99995	Yes
CR_01930C_A	CR_01930C_A	CR_01930C_A	BIO2	Ca22chrRA_C_albicans_SC5314:425220-426345	RT_Controls	37_Treated	OK	8.56845	20.5401	1.26134	1.4954	0.09275	0.99995	Yes
C1_12330W_A	C1_12330W_A	C1_12330W_A	C1_12330W_A	Ca22chr1A_C_albicans_SC5314:2687807-2689043	RT_Controls	37_Treated	OK	0.352952	0.845493	1.26032	1.05554	0.23715	0.99995	No
C2_10870W_A	C2_10870W_A	C2_10870W_A	C2_10870W_A	Ca22chr2A_C_albicans_SC5314:2227314-2228484	RT_Controls	37_Treated	OK	7.71251	18.4373	1.25735	1.4718	0.09255	0.99995	Yes
C7_00760C_A	C7_00760C_A	C7_00760C_A	C7_00760C_A	Ca22chr7A_C_albicans_SC5314:144059-144569	RT_Controls	37_Treated	OK	2.46476	5.88077	1.25456	1.42414	0.2509	0.99995	No
C4_01860C_A	C4_01860C_A	C4_01860C_A	C4_01860C_A	Ca22chr4A_C_albicans_SC5314:364596-365901	RT_Controls	37_Treated	OK	5.04393	12.0252	1.25345	1.37613	0.11045	0.99995	No
CR_09010C_A	CR_09010C_A	CR_09010C_A	CR_09010C_A	Ca22chrRA_C_albicans_SC5314:1924789-1925941	RT_Controls	37_Treated	OK	118.148	281.026	1.25011	1.3886	0.10885	0.99995	No
C1_04900W_A	C1_04900W_A	C1_04900W_A	MNN15	Ca22chr1A_C_albicans_SC5314:1017680-1019972	RT_Controls	37_Treated	OK	14.0065	33.1325	1.24215	1.45693	0.06645	0.99995	Yes
CR_05940W_A	CR_05940W_A	CR_05940W_A	CEK2	Ca22chrRA_C_albicans_SC5314:1244533-1245652	RT_Controls	37_Treated	OK	3.9917	9.43717	1.24135	1.12833	0.19755	0.99995	No
C5_04940W_A	C5_04940W_A	C5_04940W_A	C5_04940W_A	Ca22chr5A_C_albicans_SC5314:1078888-1080637	RT_Controls	37_Treated	OK	1.89025	4.46587	1.24036	1.19541	0.15085	0.99995	No
C1_13600W_A	C1_13600W_A	C1_13600W_A	C1_13600W_A	Ca22chr1A_C_albicans_SC5314:2986246-2987143	RT_Controls	37_Treated	OK	1.3218	3.11884	1.2385	1.19599	0.21005	0.99995	No
C4_04530C_A	C4_04530C_A	C4_04530C_A	PHR1	Ca22chr4A_C_albicans_SC5314:970513-972160	RT_Controls	37_Treated	OK	58.1085	136.903	1.23633	1.3038	0.11475	0.99995	No
C1_11470C_A	C1_11470C_A	C1_11470C_A	DPP1	Ca22chr1A_C_albicans_SC5314:2517425-2518211	RT_Controls	37_Treated	OK	18.2156	42.9082	1.23608	1.5564	0.10855	0.99995	No
CR_04060C_A	CR_04060C_A	CR_04060C_A	DAP1	Ca22chrRA_C_albicans_SC5314:913388-913856	RT_Controls	37_Treated	OK	128.406	302.086	1.23425	2.18226	0.08415	0.99995	Yes
C1_10290W_A	C1_10290W_A	C1_10290W_A	GCA1	Ca22chr1A_C_albicans_SC5314:2271399-2274240	RT_Controls	37_Treated	OK	2.72539	6.40477	1.23268	1.15344	0.1378	0.99995	No
C1_06860W_A	C1_06860W_A	C1_06860W_A	C1_06860W_A	Ca22chr1A_C_albicans_SC5314:1462709-1464203	RT_Controls	37_Treated	OK	0.893779	2.09792	1.23097	0.901785	0.2973	0.99995	No
C2_01250W_A	C2_01250W_A	C2_01250W_A	C2_01250W_A	Ca22chr2A_C_albicans_SC5314:211503-212085	RT_Controls	37_Treated	OK	53.7117	125.595	1.22547	2.10003	0.0595	0.99995	Yes
C1_06620C_A	C1_06620C_A	C1_06620C_A	C1_06620C_A	Ca22chr1A_C_albicans_SC5314:1417194-1417896	RT_Controls	37_Treated	OK	2.65444	6.2005	1.22398	1.19539	0.2462	0.99995	No
C2_05060C_A	C2_05060C_A	C2_05060C_A	C2_05060C_A	Ca22chr2A_C_albicans_SC5314:1047798-1048197	RT_Controls	37_Treated	OK	32.2068	75.1525	1.22246	2.37714	0.10855	0.99995	No
CR_04420C_A	CR_04420C_A	CR_04420C_A	RBR2	Ca22chrRA_C_albicans_SC5314:979244-979751	RT_Controls	37_Treated	OK	34.1354	79.6165	1.2218	2.05766	0.08585	0.99995	Yes
C1_09700W_A	C1_09700W_A	C1_09700W_A	C1_09700W_A	Ca22chr1A_C_albicans_SC5314:2134157-2134862	RT_Controls	37_Treated	OK	0.592516	1.38039	1.22015	1.10446	0.29215	0.99995	No
C1_09590C_A	C1_09590C_A	C1_09590C_A	LIP10	Ca22chr1A_C_albicans_SC5314:2111645-2113043	RT_Controls	37_Treated	NOTEST	0.0224094	0.0521002	1.21718	0	1	1	No
C5_00880C_A	C5_00880C_A	C5_00880C_A	GIT3	Ca22chr5A_C_albicans_SC5314:202589-204197	RT_Controls	37_Treated	OK	101.087	234.74	1.21547	1.16941	0.15335	0.99995	No
C7_03570W_A	C7_03570W_A	C7_03570W_A	ARG4	Ca22chr7A_C_albicans_SC5314:792046-793453	RT_Controls	37_Treated	OK	8.20521	19.0493	1.21512	1.21036	0.15175	0.99995	No
C2_08520C_A	C2_08520C_A	C2_08520C_A	C2_08520C_A	Ca22chr2A_C_albicans_SC5314:1723456-1723618	RT_Controls	37_Treated	OK	10.9811	25.4739	1.214	9.71067	0.30655	0.99995	No
C3_02360C_A	C3_02360C_A	C3_02360C_A	C3_02360C_A	Ca22chr3A_C_albicans_SC5314:514903-516670	RT_Controls	37_Treated	OK	3.82764	8.85025	1.20926	1.20994	0.13955	0.99995	No
C2_02950W_A	C2_02950W_A	C2_02950W_A	C2_02950W_A	Ca22chr2A_C_albicans_SC5314:588151-589513	RT_Controls	37_Treated	OK	1.52944	3.52313	1.20386	1.10943	0.1966	0.99995	No
C7_02070W_A	C7_02070W_A	C7_02070W_A	GRX1	Ca22chr7A_C_albicans_SC5314:460993-461365	RT_Controls	37_Treated	OK	5.62088	12.9135	1.20001	2.00992	0.22115	0.99995	No
C1_10240C_A	C1_10240C_A	C1_10240C_A	C1_10240C_A	Ca22chr1A_C_albicans_SC5314:2263976-2264711	RT_Controls	37_Treated	OK	12.8033	29.4113	1.19985	1.46412	0.14015	0.99995	No
C2_08820C_A	C2_08820C_A	C2_08820C_A	SPO11	Ca22chr2A_C_albicans_SC5314:1791401-1792331	RT_Controls	37_Treated	OK	0.489702	1.12057	1.19426	1.08481	0.25355	0.99995	No
C1_12140W_A	C1_12140W_A	C1_12140W_A	C1_12140W_A	Ca22chr1A_C_albicans_SC5314:2653554-2654043	RT_Controls	37_Treated	OK	89.714	204.632	1.18963	1.98266	0.10835	0.99995	No
CR_08700C_A	CR_08700C_A	CR_08700C_A	ARF1	Ca22chrRA_C_albicans_SC5314:1875928-1876468	RT_Controls	37_Treated	OK	118.911	270.802	1.18736	1.72521	0.13375	0.99995	No
C4_00080C_A	C4_00080C_A	C4_00080C_A	C4_00080C_A	Ca22chr4A_C_albicans_SC5314:11382-12630	RT_Controls	37_Treated	OK	3.59074	8.16953	1.18597	1.23201	0.1527	0.99995	No
C5_00520W_A	C5_00520W_A	C5_00520W_A	C5_00520W_A	Ca22chr5A_C_albicans_SC5314:105030-105504	RT_Controls	37_Treated	NOTEST	0.131513	0.298416	1.18212	0	1	1	No
C2_08890W_A	C2_08890W_A	C2_08890W_A	C2_08890W_A	Ca22chr2A_C_albicans_SC5314:1809125-1810265	RT_Controls	37_Treated	OK	1.87068	4.23293	1.17809	1.14667	0.1997	0.99995	No
C7_00290C_A	C7_00290C_A	C7_00290C_A	HGT13	Ca22chr7A_C_albicans_SC5314:43378-45102	RT_Controls	37_Treated	OK	1.27421	2.88103	1.17698	1.05405	0.2029	0.99995	No
C2_03630W_A	C2_03630W_A	C2_03630W_A	C2_03630W_A	Ca22chr2A_C_albicans_SC5314:768417-769167	RT_Controls	37_Treated	OK	0.657702	1.48555	1.1755	1.06337	0.30025	0.99995	No
C1_02580W_A	C1_02580W_A	C1_02580W_A	HNM4	Ca22chr1A_C_albicans_SC5314:540000-541512	RT_Controls	37_Treated	OK	1.79339	4.03396	1.16951	1.09368	0.19435	0.99995	No
C1_08330C_A	C1_08330C_A	C1_08330C_A	ADH2	Ca22chr1A_C_albicans_SC5314:1829193-1830240	RT_Controls	37_Treated	OK	191.897	431.006	1.16737	1.34934	0.13005	0.99995	No
CR_09290W_A	CR_09290W_A	CR_09290W_A	THI13	Ca22chrRA_C_albicans_SC5314:1972213-1973233	RT_Controls	37_Treated	OK	12.0504	27.0237	1.16514	1.42672	0.11135	0.99995	No
C5_05190W_A	C5_05190W_A	C5_05190W_A	PCL5	Ca22chr5A_C_albicans_SC5314:1139257-1140172	RT_Controls	37_Treated	OK	46.3173	103.473	1.15963	1.3528	0.1475	0.99995	No
C5_05200C_A	C5_05200C_A	C5_05200C_A	C5_05200C_A	Ca22chr5A_C_albicans_SC5314:1140238-1141543	RT_Controls	37_Treated	OK	18.9348	42.2788	1.1589	1.4381	0.09085	0.99995	Yes
CR_04960C_A	CR_04960C_A	CR_04960C_A	CRG1	Ca22chrRA_C_albicans_SC5314:1073847-1074759	RT_Controls	37_Treated	OK	22.8483	50.9905	1.15814	1.55356	0.09385	0.99995	Yes
C6_00730W_A	C6_00730W_A	C6_00730W_A	C6_00730W_A	Ca22chr6A_C_albicans_SC5314:126535-128452	RT_Controls	37_Treated	OK	0.93484	2.0852	1.1574	1.01939	0.20715	0.99995	No
C3_01040C_A	C3_01040C_A	C3_01040C_A	PRM9	Ca22chr3A_C_albicans_SC5314:213597-215352	RT_Controls	37_Treated	OK	2.28875	5.10464	1.15725	0.920736	0.20355	0.99995	No
C3_02660W_A	C3_02660W_A	C3_02660W_A	C3_02660W_A	Ca22chr3A_C_albicans_SC5314:576542-577301	RT_Controls	37_Treated	OK	1.89192	4.21081	1.15425	1.12392	0.2619	0.99995	No
C1_11530C_A	C1_11530C_A	C1_11530C_A	C1_11530C_A	Ca22chr1A_C_albicans_SC5314:2532302-2533463	RT_Controls	37_Treated	OK	5.83795	12.9585	1.15037	1.24542	0.15935	0.99995	No
C5_03930C_A	C5_03930C_A	C5_03930C_A	C5_03930C_A	Ca22chr5A_C_albicans_SC5314:859534-861340	RT_Controls	37_Treated	OK	7.80173	17.3029	1.14915	1.35726	0.0952	0.99995	Yes
CR_09940W_A	CR_09940W_A	CR_09940W_A	CR_09940W_A	Ca22chrRA_C_albicans_SC5314:2126918-2127764	RT_Controls	37_Treated	OK	1.49851	3.32072	1.14797	1.10914	0.25375	0.99995	No
C3_04790W_A	C3_04790W_A	C3_04790W_A	C3_04790W_A	Ca22chr3A_C_albicans_SC5314:1019401-1020850	RT_Controls	37_Treated	OK	30.7805	68.059	1.14477	1.35954	0.1049	0.99995	No
C1_10810W_A	C1_10810W_A	C1_10810W_A	C1_10810W_A	Ca22chr1A_C_albicans_SC5314:2396155-2398237	RT_Controls	37_Treated	OK	7.42541	16.4157	1.14453	0.224534	0.83505	0.99995	No
C3_07360W_A	C3_07360W_A	C3_07360W_A	DLD2	Ca22chr3A_C_albicans_SC5314:1691218-1692820	RT_Controls	37_Treated	OK	8.65734	19.1316	1.14396	1.35011	0.0994	0.99995	Yes
C5_00890C_A	C5_00890C_A	C5_00890C_A	GIT2	Ca22chr5A_C_albicans_SC5314:206334-207939	RT_Controls	37_Treated	OK	22.0251	48.6572	1.14351	1.41144	0.0844	0.99995	Yes
C5_04450C_A	C5_04450C_A	C5_04450C_A	C5_04450C_A	Ca22chr5A_C_albicans_SC5314:979076-979379	RT_Controls	37_Treated	OK	2.3805	5.24836	1.1406	2.06678	0.3521	0.99995	No
C6_02450W_A	C6_02450W_A	C6_02450W_A	C6_02450W_A	Ca22chr6A_C_albicans_SC5314:508861-509665	RT_Controls	37_Treated	OK	17.5076	38.5146	1.13743	1.35179	0.16275	0.99995	No
C1_01930W_A	C1_01930W_A	C1_01930W_A	C1_01930W_A	Ca22chr1A_C_albicans_SC5314:400590-401977	RT_Controls	37_Treated	OK	104.284	229.384	1.13725	1.29272	0.14605	0.99995	No
C5_01330W_A	C5_01330W_A	C5_01330W_A	C5_01330W_A	Ca22chr5A_C_albicans_SC5314:296700-297147	RT_Controls	37_Treated	OK	0.402419	0.883156	1.13397	1.25728	0.3716	0.99995	No
C5_02520W_A	C5_02520W_A	C5_02520W_A	C5_02520W_A	Ca22chr5A_C_albicans_SC5314:562887-563793	RT_Controls	37_Treated	OK	14.1675	31.0639	1.13265	1.46416	0.1088	0.99995	No
CR_02170W_A	CR_02170W_A	CR_02170W_A	MET2	Ca22chrRA_C_albicans_SC5314:475601-476831	RT_Controls	37_Treated	OK	103.853	227.452	1.13103	1.42683	0.099	0.99995	Yes
C1_01360C_A	C1_01360C_A	C1_01360C_A	C1_01360C_A	Ca22chr1A_C_albicans_SC5314:265482-267465	RT_Controls	37_Treated	OK	41.3421	90.5006	1.13031	1.31901	0.09635	0.99995	Yes
C2_03670W_A	C2_03670W_A	C2_03670W_A	SAP99	Ca22chr2A_C_albicans_SC5314:773071-774163	RT_Controls	37_Treated	OK	1.88403	4.12332	1.12998	1.10809	0.2179	0.99995	No
C3_01640C_A	C3_01640C_A	C3_01640C_A	C3_01640C_A	Ca22chr3A_C_albicans_SC5314:358101-359031	RT_Controls	37_Treated	OK	0.516232	1.12926	1.12929	0.977566	0.2972	0.99995	No
C1_09780C_A	C1_09780C_A	C1_09780C_A	C1_09780C_A	Ca22chr1A_C_albicans_SC5314:2142635-2144831	RT_Controls	37_Treated	OK	10.2638	22.449	1.12909	1.38386	0.0778	0.99995	Yes
C4_01180W_A	C4_01180W_A	C4_01180W_A	C4_01180W_A	Ca22chr4A_C_albicans_SC5314:240270-240573	RT_Controls	37_Treated	NOTEST	0.238576	0.521659	1.12866	0	1	1	No
C7_04240C_A	C7_04240C_A	C7_04240C_A	C7_04240C_A	Ca22chr7A_C_albicans_SC5314:924628-926377	RT_Controls	37_Treated	OK	29.2161	63.7618	1.12593	1.30006	0.108	0.99995	No
C5_00710W_A	C5_00710W_A	C5_00710W_A	IFF8	Ca22chr5A_C_albicans_SC5314:164507-166652	RT_Controls	37_Treated	OK	1.82775	3.98795	1.12558	1.00694	0.2035	0.99995	No
C1_13570W_A	C1_13570W_A	C1_13570W_A	MPT5	Ca22chr1A_C_albicans_SC5314:2976149-2978966	RT_Controls	37_Treated	OK	12.655	27.5819	1.12401	1.38056	0.0711	0.99995	Yes
C4_00730C_A	C4_00730C_A	C4_00730C_A	C4_00730C_A	Ca22chr4A_C_albicans_SC5314:125250-125643	RT_Controls	37_Treated	OK	11.4331	24.9014	1.12301	1.89727	0.2106	0.99995	No
C2_06700W_A	C2_06700W_A	C2_06700W_A	AMO2	Ca22chr2A_C_albicans_SC5314:1371620-1373636	RT_Controls	37_Treated	OK	17.2001	37.4291	1.12174	1.29079	0.10125	0.99995	No
C6_00890W_A	C6_00890W_A	C6_00890W_A	C6_00890W_A	Ca22chr6A_C_albicans_SC5314:174610-176875	RT_Controls	37_Treated	OK	9.78129	21.2552	1.11972	1.29631	0.09945	0.99995	Yes
C1_13430C_A	C1_13430C_A	C1_13430C_A	C1_13430C_A	Ca22chr1A_C_albicans_SC5314:2931983-2933711	RT_Controls	37_Treated	OK	10.7511	23.3091	1.11641	1.10673	0.17125	0.99995	No
C1_01290C_A	C1_01290C_A	C1_01290C_A	C1_01290C_A	Ca22chr1A_C_albicans_SC5314:255169-257443	RT_Controls	37_Treated	OK	4.44825	9.63245	1.11466	1.19855	0.1255	0.99995	No
C2_08440W_A	C2_08440W_A	C2_08440W_A	C2_08440W_A	Ca22chr2A_C_albicans_SC5314:1701367-1701685	RT_Controls	37_Treated	OK	0.951851	2.05941	1.11342	1.60614	0.43205	0.99995	No
CR_07300W_A	CR_07300W_A	CR_07300W_A	CR_07300W_A	Ca22chrRA_C_albicans_SC5314:1589556-1591749	RT_Controls	37_Treated	OK	0.411531	0.889269	1.11162	0.892861	0.2722	0.99995	No
C2_08170W_A	C2_08170W_A	C2_08170W_A	C2_08170W_A	Ca22chr2A_C_albicans_SC5314:1656940-1658284	RT_Controls	37_Treated	OK	3.14547	6.78983	1.1101	1.10555	0.19785	0.99995	No
C3_01930W_A	C3_01930W_A	C3_01930W_A	PXP2	Ca22chr3A_C_albicans_SC5314:425209-427384	RT_Controls	37_Treated	OK	2.46511	5.31567	1.1086	1.07258	0.17565	0.99995	No
CR_02350C_A	CR_02350C_A	CR_02350C_A	GEF2	Ca22chrRA_C_albicans_SC5314:520041-522621	RT_Controls	37_Treated	OK	9.43254	20.2534	1.10245	1.32855	0.08345	0.99995	Yes
C4_04720W_A	C4_04720W_A	C4_04720W_A	C4_04720W_A	Ca22chr4A_C_albicans_SC5314:1011676-1012648	RT_Controls	37_Treated	OK	88.4875	189.846	1.10128	1.39733	0.12495	0.99995	No
C4_04020C_A	C4_04020C_A	C4_04020C_A	C4_04020C_A	Ca22chr4A_C_albicans_SC5314:861269-861698	RT_Controls	37_Treated	OK	1.18011	2.52858	1.09941	1.15868	0.41655	0.99995	No
C1_00170W_A	C1_00170W_A	C1_00170W_A	LEU4	Ca22chr1A_C_albicans_SC5314:29803-31543	RT_Controls	37_Treated	OK	15.5612	33.3193	1.09841	1.34031	0.0989	0.99995	Yes
C1_05940W_A	C1_05940W_A	C1_05940W_A	PHO87	Ca22chr1A_C_albicans_SC5314:1244646-1247667	RT_Controls	37_Treated	OK	46.1108	98.7236	1.09829	1.1777	0.1202	0.99995	No
C1_03490W_A	C1_03490W_A	C1_03490W_A	C1_03490W_A	Ca22chr1A_C_albicans_SC5314:736790-737672	RT_Controls	37_Treated	OK	88.8254	190.053	1.09736	1.36712	0.1415	0.99995	No
C4_02410C_A	C4_02410C_A	C4_02410C_A	AHP1	Ca22chr4A_C_albicans_SC5314:486082-486613	RT_Controls	37_Treated	OK	1565.82	3348.51	1.0966	1.23742	0.2878	0.99995	No
C3_06040W_A	C3_06040W_A	C3_06040W_A	C3_06040W_A	Ca22chr3A_C_albicans_SC5314:1373712-1375218	RT_Controls	37_Treated	OK	3.63969	7.78289	1.09649	0.982859	0.24015	0.99995	No
C4_03100W_A	C4_03100W_A	C4_03100W_A	RBT7	Ca22chr4A_C_albicans_SC5314:646817-647795	RT_Controls	37_Treated	OK	3.97902	8.50795	1.0964	1.14572	0.2156	0.99995	No
C3_04330C_A	C3_04330C_A	C3_04330C_A	C3_04330C_A	Ca22chr3A_C_albicans_SC5314:900520-900976	RT_Controls	37_Treated	OK	302.155	645.69	1.09555	2.2076	0.13885	0.99995	No
C1_05950C_A	C1_05950C_A	C1_05950C_A	C1_05950C_A	Ca22chr1A_C_albicans_SC5314:1248212-1249460	RT_Controls	37_Treated	OK	64.7085	138.194	1.09467	1.28156	0.1316	0.99995	No
CR_02810W_A	CR_02810W_A	CR_02810W_A	CIRT4B	Ca22chrRA_C_albicans_SC5314:641815-643483	RT_Controls	37_Treated	OK	5.83517	12.4364	1.09172	1.10556	0.17615	0.99995	No
C7_01770W_A	C7_01770W_A	C7_01770W_A	C7_01770W_A	Ca22chr7A_C_albicans_SC5314:379038-379386	RT_Controls	37_Treated	OK	3.28534	6.99837	1.09098	1.5006	0.40565	0.99995	No
C1_11630C_A	C1_11630C_A	C1_11630C_A	FUS1	Ca22chr1A_C_albicans_SC5314:2550971-2552126	RT_Controls	37_Treated	OK	2.35376	5.00307	1.08785	0.984185	0.265	0.99995	No
C1_04470C_A	C1_04470C_A	C1_04470C_A	C1_04470C_A	Ca22chr1A_C_albicans_SC5314:920166-920688	RT_Controls	37_Treated	OK	53.2382	113.115	1.08725	1.86919	0.1129	0.99995	No
CR_00040C_A	CR_00040C_A	CR_00040C_A	CR_00040C_A	Ca22chrRA_C_albicans_SC5314:10645-11815	RT_Controls	37_Treated	OK	10.6297	22.5464	1.0848	1.28684	0.13955	0.99995	No
C1_13160W_A	C1_13160W_A	C1_13160W_A	PSA2	Ca22chr1A_C_albicans_SC5314:2874070-2875447	RT_Controls	37_Treated	OK	54.7976	116.196	1.08438	1.16315	0.1677	0.99995	No
C2_10160W_A	C2_10160W_A	C2_10160W_A	C2_10160W_A	Ca22chr2A_C_albicans_SC5314:2088695-2089952	RT_Controls	37_Treated	OK	15.533	32.9192	1.0836	1.37812	0.1079	0.99995	No
C1_06340W_A	C1_06340W_A	C1_06340W_A	C1_06340W_A	Ca22chr1A_C_albicans_SC5314:1344840-1348191	RT_Controls	37_Treated	OK	0.331846	0.702399	1.08178	0.868118	0.26995	0.99995	No
C2_00780W_A	C2_00780W_A	C2_00780W_A	POT1-2	Ca22chr2A_C_albicans_SC5314:133182-134364	RT_Controls	37_Treated	OK	7.07856	14.98	1.08151	1.25296	0.15345	0.99995	No
C3_02810C_A	C3_02810C_A	C3_02810C_A	FAA21	Ca22chr3A_C_albicans_SC5314:605100-607257	RT_Controls	37_Treated	OK	27.5348	58.2292	1.08049	1.34112	0.08865	0.99995	Yes
C3_04070C_A	C3_04070C_A	C3_04070C_A	CDR11	Ca22chr3A_C_albicans_SC5314:848679-853218	RT_Controls	37_Treated	OK	9.17423	19.3717	1.07829	1.14394	0.1251	0.99995	No
CR_01840W_A	CR_01840W_A	CR_01840W_A	CR_01840W_A	Ca22chrRA_C_albicans_SC5314:417068-417834	RT_Controls	37_Treated	OK	0.247442	0.521656	1.07601	0.51332	0.66195	0.99995	No
C2_03610W_A	C2_03610W_A	C2_03610W_A	FMO2	Ca22chr2A_C_albicans_SC5314:763391-765050	RT_Controls	37_Treated	OK	5.93402	12.5009	1.07495	1.19494	0.1432	0.99995	No
C5_03520W_A	C5_03520W_A	C5_03520W_A	C5_03520W_A	Ca22chr5A_C_albicans_SC5314:791002-792178	RT_Controls	37_Treated	OK	1.59876	3.36123	1.07203	0.86477	0.33345	0.99995	No
C2_04010C_A	C2_04010C_A	C2_04010C_A	HSP21	Ca22chr2A_C_albicans_SC5314:838064-838634	RT_Controls	37_Treated	OK	2922.6	6139.34	1.07083	0.91291	0.4378	0.99995	No
C2_05880W_A	C2_05880W_A	C2_05880W_A	C2_05880W_A	Ca22chr2A_C_albicans_SC5314:1204054-1204384	RT_Controls	37_Treated	OK	105.919	222.039	1.06786	0.298946	0.71585	0.99995	No
C6_03270C_A	C6_03270C_A	C6_03270C_A	AYR2	Ca22chr6A_C_albicans_SC5314:686773-687667	RT_Controls	37_Treated	OK	47.657	99.8475	1.06704	1.44449	0.1164	0.99995	No
C1_06570W_A	C1_06570W_A	C1_06570W_A	ANT1	Ca22chr1A_C_albicans_SC5314:1407256-1408294	RT_Controls	37_Treated	OK	35.3775	74.0792	1.06624	1.40107	0.11275	0.99995	No
C5_00010W_A	C5_00010W_A	C5_00010W_A	TLO11	Ca22chr5A_C_albicans_SC5314:1917-2427	RT_Controls	37_Treated	OK	12.1629	25.4524	1.06531	1.39593	0.248	0.99995	No
C7_00930W_A	C7_00930W_A	C7_00930W_A	GPH1	Ca22chr7A_C_albicans_SC5314:195078-197781	RT_Controls	37_Treated	OK	119.017	248.713	1.06331	0.951827	0.2201	0.99995	No
CR_06110C_A	CR_06110C_A	CR_06110C_A	RFX1	Ca22chrRA_C_albicans_SC5314:1302430-1304986	RT_Controls	37_Treated	OK	10.5227	21.9533	1.06093	1.12909	0.14365	0.99995	No
C4_02330C_A	C4_02330C_A	C4_02330C_A	C4_02330C_A	Ca22chr4A_C_albicans_SC5314:462581-463040	RT_Controls	37_Treated	OK	16.2337	33.7735	1.0569	1.6618	0.1998	0.99995	No
C2_10300C_A	C2_10300C_A	C2_10300C_A	C2_10300C_A	Ca22chr2A_C_albicans_SC5314:2122694-2124740	RT_Controls	37_Treated	OK	2.11505	4.3981	1.05619	1.02458	0.19665	0.99995	No
CR_07810W_A	CR_07810W_A	CR_07810W_A	YHB5	Ca22chrRA_C_albicans_SC5314:1696869-1698072	RT_Controls	37_Treated	OK	57.9122	120.293	1.05462	1.10216	0.19705	0.99995	No
C1_14030W_A	C1_14030W_A	C1_14030W_A	C1_14030W_A	Ca22chr1A_C_albicans_SC5314:3089847-3090855	RT_Controls	37_Treated	OK	35.1275	72.9479	1.05427	1.44225	0.10535	0.99995	No
C3_05840W_A	C3_05840W_A	C3_05840W_A	C3_05840W_A	Ca22chr3A_C_albicans_SC5314:1309840-1311451	RT_Controls	37_Treated	OK	1.53837	3.19247	1.05327	0.868855	0.2922	0.99995	No
C2_02790C_A	C2_02790C_A	C2_02790C_A	C2_02790C_A	Ca22chr2A_C_albicans_SC5314:556998-558633	RT_Controls	37_Treated	OK	0.570133	1.18143	1.05116	0.865814	0.29995	0.99995	No
C4_02230C_A	C4_02230C_A	C4_02230C_A	C4_02230C_A	Ca22chr4A_C_albicans_SC5314:442009-442921	RT_Controls	37_Treated	OK	0.728394	1.50855	1.05037	0.827491	0.3909	0.99995	No
CR_07800W_A	CR_07800W_A	CR_07800W_A	SAP2	Ca22chrRA_C_albicans_SC5314:1692631-1693828	RT_Controls	37_Treated	OK	18.6905	38.6893	1.04963	1.1564	0.18275	0.99995	No
C2_05700W_A	C2_05700W_A	C2_05700W_A	OSM1	Ca22chr2A_C_albicans_SC5314:1165369-1166881	RT_Controls	37_Treated	OK	138.951	286.722	1.04508	0.971487	0.24805	0.99995	No
CR_06990W_A	CR_06990W_A	CR_06990W_A	CR_06990W_A	Ca22chrRA_C_albicans_SC5314:1496721-1499319	RT_Controls	37_Treated	NOTEST	0.0593056	0.122258	1.04369	0	1	1	No
C1_12030W_A	C1_12030W_A	C1_12030W_A	SER33	Ca22chr1A_C_albicans_SC5314:2632862-2634254	RT_Controls	37_Treated	OK	254.034	523.37	1.04281	1.00771	0.22575	0.99995	No
CR_02780W_A	CR_02780W_A	CR_02780W_A	CR_02780W_A	Ca22chrRA_C_albicans_SC5314:636865-637357	RT_Controls	37_Treated	OK	8.41145	17.3205	1.04205	1.32767	0.2834	0.99995	No
CR_09470W_A	CR_09470W_A	CR_09470W_A	AXL1	Ca22chrRA_C_albicans_SC5314:2017153-2021266	RT_Controls	37_Treated	OK	4.15329	8.51481	1.03572	1.08986	0.15035	0.99995	No
C1_00350C_A	C1_00350C_A	C1_00350C_A	HMX1	Ca22chr1A_C_albicans_SC5314:50805-51681	RT_Controls	37_Treated	OK	389.443	797.263	1.03364	1.16572	0.2154	0.99995	No
C2_08690C_A	C2_08690C_A	C2_08690C_A	C2_08690C_A	Ca22chr2A_C_albicans_SC5314:1764312-1768830	RT_Controls	37_Treated	OK	4.18955	8.56262	1.03126	0.462338	0.53675	0.99995	No
CR_02910W_A	CR_02910W_A	CR_02910W_A	CR_02910W_A	Ca22chrRA_C_albicans_SC5314:664675-666961	RT_Controls	37_Treated	OK	14.7143	30.0553	1.0304	1.21615	0.12205	0.99995	No
C6_04420W_A	C6_04420W_A	C6_04420W_A	C6_04420W_A	Ca22chr6A_C_albicans_SC5314:985841-986297	RT_Controls	37_Treated	OK	716.165	1461.93	1.02951	1.51641	0.24635	0.99995	No
C6_02620C_A	C6_02620C_A	C6_02620C_A	C6_02620C_A	Ca22chr6A_C_albicans_SC5314:534067-534433	RT_Controls	37_Treated	OK	16.6549	33.9884	1.0291	1.7235	0.298	0.99995	No
C6_02200C_A	C6_02200C_A	C6_02200C_A	C6_02200C_A	Ca22chr6A_C_albicans_SC5314:458120-458522	RT_Controls	37_Treated	OK	18.9129	38.5737	1.02825	1.74643	0.2338	0.99995	No
CR_00740C_A	CR_00740C_A	CR_00740C_A	BMT3	Ca22chrRA_C_albicans_SC5314:172977-174627	RT_Controls	37_Treated	OK	13.5722	27.6789	1.02813	1.28423	0.11785	0.99995	No
C3_06510C_A	C3_06510C_A	C3_06510C_A	HST6	Ca22chr3A_C_albicans_SC5314:1486241-1490213	RT_Controls	37_Treated	OK	0.307303	0.626636	1.02797	0.818024	0.2846	0.99995	No
C1_14010W_A	C1_14010W_A	C1_14010W_A	CSK1	Ca22chr1A_C_albicans_SC5314:3087545-3088738	RT_Controls	37_Treated	NOTEST	0.0985813	0.200924	1.02727	0	1	1	No
C2_01300C_A	C2_01300C_A	C2_01300C_A	MNN24	Ca22chr2A_C_albicans_SC5314:219288-221418	RT_Controls	37_Treated	OK	14.7867	30.0804	1.02452	1.22769	0.12115	0.99995	No
C2_10180W_A	C2_10180W_A	C2_10180W_A	IFR1	Ca22chr2A_C_albicans_SC5314:2093230-2094343	RT_Controls	37_Treated	OK	7.49418	15.2329	1.02335	1.12792	0.20085	0.99995	No
C4_06120W_A	C4_06120W_A	C4_06120W_A	GDH3	Ca22chr4A_C_albicans_SC5314:1362405-1363776	RT_Controls	37_Treated	OK	505.615	1027.61	1.02318	0.934676	0.26505	0.99995	No
C1_02600W_A	C1_02600W_A	C1_02600W_A	SNO1	Ca22chr1A_C_albicans_SC5314:544055-544805	RT_Controls	37_Treated	OK	64.3859	130.726	1.02172	1.55851	0.10595	0.99995	No
C2_00770W_A	C2_00770W_A	C2_00770W_A	C2_00770W_A	Ca22chr2A_C_albicans_SC5314:132165-132792	RT_Controls	37_Treated	OK	29.6355	60.101	1.02006	1.4646	0.16545	0.99995	No
C4_00640W_A	C4_00640W_A	C4_00640W_A	C4_00640W_A	Ca22chr4A_C_albicans_SC5314:110377-110908	RT_Controls	37_Treated	OK	1.40445	2.84452	1.01819	1.17828	0.32525	0.99995	No
C1_00680W_A	C1_00680W_A	C1_00680W_A	ASM3	Ca22chr1A_C_albicans_SC5314:117318-119442	RT_Controls	37_Treated	OK	10.196	20.6437	1.01769	1.22469	0.1238	0.99995	No
C1_08340C_A	C1_08340C_A	C1_08340C_A	C1_08340C_A	Ca22chr1A_C_albicans_SC5314:1831871-1832345	RT_Controls	37_Treated	OK	48.7914	98.7213	1.01673	1.87861	0.13725	0.99995	No
C2_04050C_A	C2_04050C_A	C2_04050C_A	DCK1	Ca22chr2A_C_albicans_SC5314:847532-853277	RT_Controls	37_Treated	OK	31.8079	64.3527	1.01662	0.931931	0.208	0.99995	No
C4_02580W_A	C4_02580W_A	C4_02580W_A	C4_02580W_A	Ca22chr4A_C_albicans_SC5314:533913-534252	RT_Controls	37_Treated	NOTEST	0.0812793	0.164116	1.01376	0	1	1	No
CR_09070C_A	CR_09070C_A	CR_09070C_A	CR_09070C_A	Ca22chrRA_C_albicans_SC5314:1936662-1938141	RT_Controls	37_Treated	OK	23.6635	47.7297	1.01222	1.1989	0.1464	0.99995	No
C6_01500C_A	C6_01500C_A	C6_01500C_A	TRY5	Ca22chr6A_C_albicans_SC5314:298210-301176	RT_Controls	37_Treated	OK	1.53358	3.0918	1.01155	0.934447	0.2303	0.99995	No
C2_00750W_A	C2_00750W_A	C2_00750W_A	C2_00750W_A	Ca22chr2A_C_albicans_SC5314:130082-130937	RT_Controls	37_Treated	OK	7.17841	14.4683	1.01116	1.15399	0.22	0.99995	No
CR_06460W_A	CR_06460W_A	CR_06460W_A	GST3	Ca22chrRA_C_albicans_SC5314:1380752-1381400	RT_Controls	37_Treated	OK	6.24686	12.5861	1.01063	1.1601	0.27135	0.99995	No
CR_02360W_A	CR_02360W_A	CR_02360W_A	IDP2	Ca22chrRA_C_albicans_SC5314:525540-526779	RT_Controls	37_Treated	OK	91.8582	184.844	1.00883	1.102	0.1881	0.99995	No
CR_03850W_A	CR_03850W_A	CR_03850W_A	HGT3	Ca22chrRA_C_albicans_SC5314:860661-862605	RT_Controls	37_Treated	OK	3.29491	6.62008	1.00661	1.01966	0.2082	0.99995	No
C2_01020W_A	C2_01020W_A	C2_01020W_A	HGT6	Ca22chr2A_C_albicans_SC5314:170188-171841	RT_Controls	37_Treated	OK	156.015	313.152	1.00517	0.871112	0.29035	0.99995	No
C1_10740C_A	C1_10740C_A	C1_10740C_A	ASR1	Ca22chr1A_C_albicans_SC5314:2383418-2384576	RT_Controls	37_Treated	OK	76.5463	153.423	1.00311	1.2446	0.1477	0.99995	No
C1_03870C_A	C1_03870C_A	C1_03870C_A	C1_03870C_A	Ca22chr1A_C_albicans_SC5314:813868-815560	RT_Controls	37_Treated	OK	53.5113	107.092	1.00093	1.12583	0.17045	0.99995	No
C1_13460W_A	C1_13460W_A	C1_13460W_A	C1_13460W_A	Ca22chr1A_C_albicans_SC5314:2951045-2951402	RT_Controls	37_Treated	OK	0.792488	1.58475	0.999794	1.21899	0.49755	0.99995	No
C6_00750C_A	C6_00750C_A	C6_00750C_A	PGK1	Ca22chr6A_C_albicans_SC5314:131976-133230	RT_Controls	37_Treated	OK	3311.27	6619.58	0.999356	0.769681	0.36485	0.99995	No
C7_00240W_A	C7_00240W_A	C7_00240W_A	C7_00240W_A	Ca22chr7A_C_albicans_SC5314:33809-34454	RT_Controls	37_Treated	OK	71.5821	143.031	0.998655	1.65509	0.1127	0.99995	No
C6_03280W_A	C6_03280W_A	C6_03280W_A	C6_03280W_A	Ca22chr6A_C_albicans_SC5314:688256-689066	RT_Controls	37_Treated	OK	1.239	2.4731	0.997143	0.916404	0.34995	0.99995	No
C3_07010W_A	C3_07010W_A	C3_07010W_A	POS5	Ca22chr3A_C_albicans_SC5314:1603059-1604628	RT_Controls	37_Treated	OK	14.2973	28.4967	0.995057	1.23092	0.13675	0.99995	No
C4_02380W_A	C4_02380W_A	C4_02380W_A	C4_02380W_A	Ca22chr4A_C_albicans_SC5314:479419-479728	RT_Controls	37_Treated	OK	0.577069	1.14599	0.989774	1.53599	0.5248	0.99995	No
CR_02060W_A	CR_02060W_A	CR_02060W_A	CR_02060W_A	Ca22chrRA_C_albicans_SC5314:452956-453880	RT_Controls	37_Treated	OK	32.9671	65.351	0.987183	1.37738	0.13335	0.99995	No
C2_02190C_A	C2_02190C_A	C2_02190C_A	C2_02190C_A	Ca22chr2A_C_albicans_SC5314:429571-430366	RT_Controls	37_Treated	OK	10.182	20.176	0.986622	1.24436	0.2006	0.99995	No
C2_01380W_A	C2_01380W_A	C2_01380W_A	PLB4.5	Ca22chr2A_C_albicans_SC5314:241110-243219	RT_Controls	37_Treated	OK	32.5341	64.4518	0.986266	0.995799	0.19965	0.99995	No
C5_04250W_A	C5_04250W_A	C5_04250W_A	MRV8	Ca22chr5A_C_albicans_SC5314:943000-943615	RT_Controls	37_Treated	OK	1.60699	3.1827	0.985889	1.0494	0.3395	0.99995	No
C2_07280W_A	C2_07280W_A	C2_07280W_A	C2_07280W_A	Ca22chr2A_C_albicans_SC5314:1482647-1484342	RT_Controls	37_Treated	OK	1.46403	2.89837	0.985297	0.869218	0.2934	0.99995	No
C1_12840W_A	C1_12840W_A	C1_12840W_A	C1_12840W_A	Ca22chr1A_C_albicans_SC5314:2797708-2798062	RT_Controls	37_Treated	OK	31.9873	63.2784	0.984216	2.09219	0.21315	0.99995	No
CR_09030C_A	CR_09030C_A	CR_09030C_A	CR_09030C_A	Ca22chrRA_C_albicans_SC5314:1930896-1931196	RT_Controls	37_Treated	OK	31.5409	62.3675	0.983569	2.26364	0.30265	0.99995	No
CR_02020C_A	CR_02020C_A	CR_02020C_A	OPT1	Ca22chrRA_C_albicans_SC5314:440886-443238	RT_Controls	37_Treated	OK	8.75292	17.2729	0.980672	1.16517	0.1375	0.99995	No
C3_02680C_A	C3_02680C_A	C3_02680C_A	SLD1	Ca22chr3A_C_albicans_SC5314:578560-580315	RT_Controls	37_Treated	OK	35.3762	69.7721	0.979869	1.19978	0.1367	0.99995	No
C2_04430W_A	C2_04430W_A	C2_04430W_A	C2_04430W_A	Ca22chr2A_C_albicans_SC5314:928589-928910	RT_Controls	37_Treated	OK	2.23521	4.40343	0.978218	1.69411	0.40355	0.99995	No
C6_03960W_A	C6_03960W_A	C6_03960W_A	C6_03960W_A	Ca22chr6A_C_albicans_SC5314:857388-859491	RT_Controls	37_Treated	OK	53.8543	106.005	0.977001	1.004	0.20295	0.99995	No
C1_00190C_A	C1_00190C_A	C1_00190C_A	C1_00190C_A	Ca22chr1A_C_albicans_SC5314:32679-33318	RT_Controls	37_Treated	OK	48.6755	95.804	0.976891	1.18173	0.26305	0.99995	No
C1_01770W_A	C1_01770W_A	C1_01770W_A	MAK32	Ca22chr1A_C_albicans_SC5314:366729-367860	RT_Controls	37_Treated	OK	10.4873	20.6255	0.97579	1.17434	0.17435	0.99995	No
C1_08190C_A	C1_08190C_A	C1_08190C_A	CAT8	Ca22chr1A_C_albicans_SC5314:1790346-1793517	RT_Controls	37_Treated	OK	4.87759	9.55756	0.970476	0.991837	0.2017	0.99995	No
C7_02230W_A	C7_02230W_A	C7_02230W_A	C7_02230W_A	Ca22chr7A_C_albicans_SC5314:486518-486872	RT_Controls	37_Treated	OK	1.25214	2.45262	0.969936	1.33556	0.4488	0.99995	No
CR_08850W_A	CR_08850W_A	CR_08850W_A	CR_08850W_A	Ca22chrRA_C_albicans_SC5314:1900673-1900997	RT_Controls	37_Treated	OK	2.54232	4.97715	0.969173	1.37814	0.4979	0.99995	No
C2_00010W_A	C2_00010W_A	C2_00010W_A	TLO5	Ca22chr2A_C_albicans_SC5314:4247-4778	RT_Controls	37_Treated	OK	12.984	25.4056	0.968407	1.31364	0.2669	0.99995	No
CR_03510W_A	CR_03510W_A	CR_03510W_A	CR_03510W_A	Ca22chrRA_C_albicans_SC5314:780327-782037	RT_Controls	37_Treated	OK	0.641351	1.2539	0.967234	0.823375	0.3217	0.99995	No
C6_04650W_A	C6_04650W_A	C6_04650W_A	C6_04650W_A	Ca22chr6A_C_albicans_SC5314:1028579-1031093	RT_Controls	37_Treated	OK	17.1549	33.5349	0.967043	1.21066	0.1155	0.99995	No
C4_06570C_A	C4_06570C_A	C4_06570C_A	PDC11	Ca22chr4A_C_albicans_SC5314:1468067-1469771	RT_Controls	37_Treated	OK	2362.71	4617.82	0.966769	0.670353	0.4195	0.99995	No
C1_12090C_A	C1_12090C_A	C1_12090C_A	C1_12090C_A	Ca22chr1A_C_albicans_SC5314:2643533-2644889	RT_Controls	37_Treated	OK	0.356127	0.695752	0.966181	0.796019	0.35885	0.99995	No
CR_09090C_A	CR_09090C_A	CR_09090C_A	CR_09090C_A	Ca22chrRA_C_albicans_SC5314:1940338-1941622	RT_Controls	37_Treated	OK	11.5506	22.5498	0.965145	1.18129	0.1667	0.99995	No
C1_06280C_A	C1_06280C_A	C1_06280C_A	UME6	Ca22chr1A_C_albicans_SC5314:1314437-1316969	RT_Controls	37_Treated	OK	3.22862	6.30249	0.965003	0.949758	0.22315	0.99995	No
CR_08720W_A	CR_08720W_A	CR_08720W_A	CR_08720W_A	Ca22chrRA_C_albicans_SC5314:1879050-1880994	RT_Controls	37_Treated	OK	2.12067	4.1285	0.961099	0.804442	0.31475	0.99995	No
C3_04000C_A	C3_04000C_A	C3_04000C_A	CTN3	Ca22chr3A_C_albicans_SC5314:832410-835089	RT_Controls	37_Treated	OK	10.9423	21.2703	0.958928	0.879057	0.2589	0.99995	No
C2_08340C_A	C2_08340C_A	C2_08340C_A	C2_08340C_A	Ca22chr2A_C_albicans_SC5314:1682883-1683324	RT_Controls	37_Treated	OK	2.08561	4.05323	0.958605	1.22078	0.3751	0.99995	No
C1_03390W_A	C1_03390W_A	C1_03390W_A	EHT1	Ca22chr1A_C_albicans_SC5314:712966-714244	RT_Controls	37_Treated	OK	103.328	200.24	0.954505	1.0917	0.1933	0.99995	No
C1_10600C_A	C1_10600C_A	C1_10600C_A	C1_10600C_A	Ca22chr1A_C_albicans_SC5314:2348534-2348957	RT_Controls	37_Treated	OK	0.406602	0.78698	0.952708	1.02499	0.4975	0.99995	No
C2_03110W_A	C2_03110W_A	C2_03110W_A	C2_03110W_A	Ca22chr2A_C_albicans_SC5314:628184-629063	RT_Controls	37_Treated	OK	6.60131	12.7751	0.952509	1.05269	0.2558	0.99995	No
C2_02140C_A	C2_02140C_A	C2_02140C_A	C2_02140C_A	Ca22chr2A_C_albicans_SC5314:418908-419430	RT_Controls	37_Treated	NOTEST	0.17393	0.336153	0.95061	0	1	1	No
C6_01490C_A	C6_01490C_A	C6_01490C_A	C6_01490C_A	Ca22chr6A_C_albicans_SC5314:297608-298052	RT_Controls	37_Treated	OK	8.74155	16.8906	0.950259	1.42629	0.28455	0.99995	No
C6_03760C_A	C6_03760C_A	C6_03760C_A	SHM2	Ca22chr6A_C_albicans_SC5314:810621-812034	RT_Controls	37_Treated	OK	402.233	777.039	0.949957	0.816594	0.3222	0.99995	No
CR_07480W_A	CR_07480W_A	CR_07480W_A	CR_07480W_A	Ca22chrRA_C_albicans_SC5314:1622532-1623873	RT_Controls	37_Treated	OK	28.6096	55.2445	0.949332	1.1359	0.1783	0.99995	No
C2_06870C_A	C2_06870C_A	C2_06870C_A	PST1	Ca22chr2A_C_albicans_SC5314:1412525-1413122	RT_Controls	37_Treated	OK	171.456	330.136	0.945222	1.45024	0.1817	0.99995	No
CR_05270W_A	CR_05270W_A	CR_05270W_A	CR_05270W_A	Ca22chrRA_C_albicans_SC5314:1136782-1137402	RT_Controls	37_Treated	OK	1.10219	2.12032	0.943905	0.959114	0.687	0.99995	No
C2_03270W_A	C2_03270W_A	C2_03270W_A	GPM1	Ca22chr2A_C_albicans_SC5314:675805-676552	RT_Controls	37_Treated	OK	5230.64	10028.1	0.938983	0.836927	0.39125	0.99995	No
C7_00870W_A	C7_00870W_A	C7_00870W_A	C7_00870W_A	Ca22chr7A_C_albicans_SC5314:174288-176121	RT_Controls	37_Treated	OK	2.07654	3.98046	0.938752	0.77884	0.3351	0.99995	No
C5_00580W_A	C5_00580W_A	C5_00580W_A	C5_00580W_A	Ca22chr5A_C_albicans_SC5314:130819-132904	RT_Controls	37_Treated	OK	15.7421	30.1576	0.937899	1.18113	0.1348	0.99995	No
C1_13270W_A	C1_13270W_A	C1_13270W_A	C1_13270W_A	Ca22chr1A_C_albicans_SC5314:2894166-2895063	RT_Controls	37_Treated	OK	60.0039	114.736	0.935192	1.32306	0.1478	0.99995	No
CR_02230W_A	CR_02230W_A	CR_02230W_A	CR_02230W_A	Ca22chrRA_C_albicans_SC5314:497837-498158	RT_Controls	37_Treated	OK	0.92945	1.77646	0.934553	1.25741	0.53495	0.99995	No
C1_06130C_A	C1_06130C_A	C1_06130C_A	HAC1	Ca22chr1A_C_albicans_SC5314:1284279-1285402	RT_Controls	37_Treated	OK	66.4794	126.863	0.932293	1.20625	0.16735	0.99995	No
C2_06720W_A	C2_06720W_A	C2_06720W_A	GRE2	Ca22chr2A_C_albicans_SC5314:1376329-1377367	RT_Controls	37_Treated	OK	33.063	63.0548	0.931388	1.23462	0.1655	0.99995	No
C2_01780W_A	C2_01780W_A	C2_01780W_A	MSB2	Ca22chr2A_C_albicans_SC5314:327674-331904	RT_Controls	37_Treated	OK	21.4883	40.9508	0.930337	1.02283	0.1739	0.99995	No
C3_05710W_A	C3_05710W_A	C3_05710W_A	RCT1	Ca22chr3A_C_albicans_SC5314:1279080-1279656	RT_Controls	37_Treated	OK	1325.21	2524.52	0.929789	1.1639	0.2959	0.99995	No
C4_04190C_A	C4_04190C_A	C4_04190C_A	C4_04190C_A	Ca22chr4A_C_albicans_SC5314:897091-899638	RT_Controls	37_Treated	OK	1.85728	3.52525	0.924532	0.601176	0.41935	0.99995	No
C5_04440C_A	C5_04440C_A	C5_04440C_A	SFC1	Ca22chr5A_C_albicans_SC5314:977028-977940	RT_Controls	37_Treated	OK	133.062	252.463	0.923976	0.882042	0.3446	0.99995	No
C4_06550C_A	C4_06550C_A	C4_06550C_A	IFF5	Ca22chr4A_C_albicans_SC5314:1461104-1465031	RT_Controls	37_Treated	OK	4.98357	9.44266	0.922016	1.05714	0.16255	0.99995	No
C4_02340W_A	C4_02340W_A	C4_02340W_A	C4_02340W_A	Ca22chr4A_C_albicans_SC5314:463582-463966	RT_Controls	37_Treated	OK	530.855	1005.67	0.921767	2.09275	0.16955	0.99995	No
C2_06340W_A	C2_06340W_A	C2_06340W_A	EFH1	Ca22chr2A_C_albicans_SC5314:1295310-1297473	RT_Controls	37_Treated	OK	2.4583	4.65376	0.920733	0.848783	0.2793	0.99995	No
C6_01810W_A	C6_01810W_A	C6_01810W_A	C6_01810W_A	Ca22chr6A_C_albicans_SC5314:378945-380427	RT_Controls	37_Treated	OK	0.813696	1.53937	0.919778	0.769899	0.36405	0.99995	No
C4_06180C_A	C4_06180C_A	C4_06180C_A	C4_06180C_A	Ca22chr4A_C_albicans_SC5314:1382071-1382211	RT_Controls	37_Treated	OK	79.205	149.695	0.918367	11.5464	0.4096	0.99995	No
C6_04410C_A	C6_04410C_A	C6_04410C_A	C6_04410C_A	Ca22chr6A_C_albicans_SC5314:984318-985389	RT_Controls	37_Treated	OK	30.6942	57.9615	0.91713	1.2517	0.15595	0.99995	No
C1_02140C_A	C1_02140C_A	C1_02140C_A	C1_02140C_A	Ca22chr1A_C_albicans_SC5314:451279-451624	RT_Controls	37_Treated	OK	0.656444	1.23684	0.913911	1.21615	0.5135	0.99995	No
CR_05000C_A	CR_05000C_A	CR_05000C_A	CR_05000C_A	Ca22chrRA_C_albicans_SC5314:1081689-1082016	RT_Controls	37_Treated	OK	2.70365	5.09399	0.91389	1.61914	0.4024	0.99995	No
C3_03360W_A	C3_03360W_A	C3_03360W_A	FCY2	Ca22chr3A_C_albicans_SC5314:704144-705725	RT_Controls	37_Treated	OK	24.3623	45.8673	0.912814	1.05655	0.19605	0.99995	No
CR_09610C_A	CR_09610C_A	CR_09610C_A	CR_09610C_A	Ca22chrRA_C_albicans_SC5314:2044931-2046140	RT_Controls	37_Treated	OK	23.9287	44.9188	0.908577	1.13406	0.18595	0.99995	No
C2_09810C_A	C2_09810C_A	C2_09810C_A	C2_09810C_A	Ca22chr2A_C_albicans_SC5314:2003064-2004369	RT_Controls	37_Treated	OK	3.57818	6.71145	0.9074	0.911296	0.28565	0.99995	No
C2_06180C_A	C2_06180C_A	C2_06180C_A	FGR12	Ca22chr2A_C_albicans_SC5314:1260496-1261645	RT_Controls	37_Treated	NOTEST	0.0351085	0.06583	0.906924	0	1	1	No
C4_07020C_A	C4_07020C_A	C4_07020C_A	C4_07020C_A	Ca22chr4A_C_albicans_SC5314:1552508-1552955	RT_Controls	37_Treated	OK	4.62048	8.66152	0.906576	1.27239	0.34525	0.99995	No
C3_05640W_A	C3_05640W_A	C3_05640W_A	C3_05640W_A	Ca22chr3A_C_albicans_SC5314:1260220-1261498	RT_Controls	37_Treated	OK	0.154957	0.289611	0.902245	0.69521	0.4399	0.99995	No
CR_05490W_A	CR_05490W_A	CR_05490W_A	SUA72	Ca22chrRA_C_albicans_SC5314:1167477-1168518	RT_Controls	37_Treated	OK	15.9665	29.8388	0.902142	1.06621	0.23185	0.99995	No
C4_01640C_A	C4_01640C_A	C4_01640C_A	C4_01640C_A	Ca22chr4A_C_albicans_SC5314:327197-327290	RT_Controls	37_Treated	OK	263.077	491.51	0.901739	46.1479	0.3957	0.99995	No
C7_02810W_A	C7_02810W_A	C7_02810W_A	PRX1	Ca22chr7A_C_albicans_SC5314:605319-606051	RT_Controls	37_Treated	OK	97.7191	182.417	0.900527	1.31684	0.18265	0.99995	No
C4_05540W_A	C4_05540W_A	C4_05540W_A	HOM3	Ca22chr4A_C_albicans_SC5314:1210136-1211771	RT_Controls	37_Treated	OK	61.5747	114.894	0.899899	1.11003	0.17145	0.99995	No
C4_05120C_A	C4_05120C_A	C4_05120C_A	C4_05120C_A	Ca22chr4A_C_albicans_SC5314:1104279-1104594	RT_Controls	37_Treated	OK	1.58082	2.94719	0.898672	1.33179	0.5228	0.99995	No
C1_00860W_A	C1_00860W_A	C1_00860W_A	C1_00860W_A	Ca22chr1A_C_albicans_SC5314:168532-169534	RT_Controls	37_Treated	OK	17.5977	32.8034	0.898455	1.19451	0.1878	0.99995	No
C5_05070W_A	C5_05070W_A	C5_05070W_A	C5_05070W_A	Ca22chr5A_C_albicans_SC5314:1109828-1112132	RT_Controls	37_Treated	OK	7.15866	13.3237	0.896232	1.03908	0.18355	0.99995	No
C1_01220C_A	C1_01220C_A	C1_01220C_A	C1_01220C_A	Ca22chr1A_C_albicans_SC5314:246660-247413	RT_Controls	37_Treated	OK	21.7508	40.392	0.893002	1.13422	0.2412	0.99995	No
CR_05280W_A	CR_05280W_A	CR_05280W_A	CR_05280W_A	Ca22chrRA_C_albicans_SC5314:1136782-1137402	RT_Controls	37_Treated	OK	2.02625	3.75643	0.890548	0.454266	0.5271	0.99995	No
C1_07480C_A	C1_07480C_A	C1_07480C_A	C1_07480C_A	Ca22chr1A_C_albicans_SC5314:1619303-1621175	RT_Controls	37_Treated	OK	1.14068	2.11274	0.889215	0.802876	0.31445	0.99995	No
CR_04510W_A	CR_04510W_A	CR_04510W_A	HXK2	Ca22chrRA_C_albicans_SC5314:995375-996830	RT_Controls	37_Treated	OK	867.703	1606.64	0.888771	0.675097	0.4123	0.99995	No
CR_06240C_A	CR_06240C_A	CR_06240C_A	ZCF19	Ca22chrRA_C_albicans_SC5314:1328223-1330083	RT_Controls	37_Treated	OK	3.39538	6.28342	0.887979	0.913094	0.256	0.99995	No
CR_07160C_A	CR_07160C_A	CR_07160C_A	CR_07160C_A	Ca22chrRA_C_albicans_SC5314:1560576-1561917	RT_Controls	37_Treated	OK	6.83881	12.6469	0.886961	0.905229	0.2853	0.99995	No
C6_04430W_A	C6_04430W_A	C6_04430W_A	CST5	Ca22chr6A_C_albicans_SC5314:987662-991299	RT_Controls	37_Treated	OK	9.05338	16.7138	0.884508	0.65747	0.46915	0.99995	No
C1_13180W_A	C1_13180W_A	C1_13180W_A	C1_13180W_A	Ca22chr1A_C_albicans_SC5314:2879440-2880202	RT_Controls	37_Treated	OK	2.7878	5.13748	0.881934	0.937927	0.3513	0.99995	No
CR_04250W_A	CR_04250W_A	CR_04250W_A	CR_04250W_A	Ca22chrRA_C_albicans_SC5314:952019-953492	RT_Controls	37_Treated	OK	1.68685	3.10851	0.881892	0.742525	0.37445	0.99995	No
C1_00830W_A	C1_00830W_A	C1_00830W_A	C1_00830W_A	Ca22chr1A_C_albicans_SC5314:158724-160524	RT_Controls	37_Treated	OK	15.3617	28.3028	0.881605	1.10837	0.1667	0.99995	No
C7_01800C_A	C7_01800C_A	C7_01800C_A	PFK2	Ca22chr7A_C_albicans_SC5314:385957-388798	RT_Controls	37_Treated	OK	151.056	278.18	0.880941	0.742981	0.33255	0.99995	No
CR_01730W_A	CR_01730W_A	CR_01730W_A	IFU5	Ca22chrRA_C_albicans_SC5314:395477-396188	RT_Controls	37_Treated	OK	164.427	302.733	0.8806	1.35515	0.17375	0.99995	No
C3_00810C_A	C3_00810C_A	C3_00810C_A	FOX2	Ca22chr3A_C_albicans_SC5314:157965-160686	RT_Controls	37_Treated	OK	30.0547	55.2755	0.879049	0.920254	0.2292	0.99995	No
C4_05770C_A	C4_05770C_A	C4_05770C_A	CFL1	Ca22chr4A_C_albicans_SC5314:1272200-1274483	RT_Controls	37_Treated	OK	10.3528	19.023	0.877718	0.947724	0.2236	0.99995	No
C3_06790W_A	C3_06790W_A	C3_06790W_A	TRY6	Ca22chr3A_C_albicans_SC5314:1548989-1550393	RT_Controls	37_Treated	OK	13.3798	24.584	0.877667	0.872052	0.30135	0.99995	No
CR_06790C_A	CR_06790C_A	CR_06790C_A	CR_06790C_A	Ca22chrRA_C_albicans_SC5314:1457396-1459211	RT_Controls	37_Treated	OK	8.85696	16.2694	0.877273	1.01952	0.20965	0.99995	No
CR_10100C_A	CR_10100C_A	CR_10100C_A	INO1	Ca22chrRA_C_albicans_SC5314:2155481-2157044	RT_Controls	37_Treated	OK	347.414	637.8	0.876446	0.589683	0.4868	0.99995	No
C3_06530W_A	C3_06530W_A	C3_06530W_A	C3_06530W_A	Ca22chr3A_C_albicans_SC5314:1492057-1492954	RT_Controls	37_Treated	OK	27.438	50.3622	0.876168	1.21336	0.1915	0.99995	No
C3_02250C_A	C3_02250C_A	C3_02250C_A	C3_02250C_A	Ca22chr3A_C_albicans_SC5314:488395-488884	RT_Controls	37_Treated	OK	1.80311	3.30835	0.875623	1.01445	0.4292	0.99995	No
[truncated: 5,915 more rows]
