# Supplementary material for: Candida albicans Sfl1/Sfl2 regulatory network drives the formation of pathogenic microcolonies
Source: PLoS Pathog. 2018 Sep 25;14(9):e1007316. doi: 10.1371/journal.ppat.1007316 (PMC6173444; doi:10.1371/journal.ppat.1007316)
Supplement: S2 Table — Core microcolony genes were used to predict potential transcriptional factors. Analysis performed on July 13th, 2017. (XLSX) [file ppat.1007316.s006.xlsx]

## Sheet: S Table 3 Legend
S2 Table. Pathoyeastract predicted transcriptional factor (TF) dataset. Core microcolony genes were used to predict potential transcriptional factors. Analysis performed on July 13th, 2017.
Column Descriptions:
	Transcription factor: The standard name for the TF according to Assembly 22 of the candida genome database. Links to the pathoyeastract database.
	% in user dataset: The percentage of the core microcolony genes that are regulated by the corresponding TF.
	% in PathoYeastract: The percentage of core microcolony genes regulated by this TF relative to the total number of known genes regulated by this TF in the pathoyeastract database.
	p-Value: A detailed description of the p-value calculation can be found at http://pathoyeastract.org/calbicans/tutorial.php
	Target ORF/Genes: Lists the specific core microcolony genes that are regulated by the corresponding TF.

## Sheet: Predicted regulators
Transcription Factor	% in user set	% in PathoYeastract	p-value	Target ORF/Genes
Rob1p	0.7	0.0162	7.60617e-10	C1_10170W_A HYR1 SOD5 GIT1 ECE1 HWP1 C5_01070C_A TNA1 SAP5 C6_03600C_A IHD1C7_00430W_A LIP8 C7_03310W_A
Mcm1p	0.7	0.0096	1.26856e-06	C1_10170W_A HYR1 SOD5 HGT20 AMO1 GIT1 ECE1 HWP1 C5_01070C_A SAP5 C6_03600C_AIHD1 C7_00430W_A SEO1
Nrg1p	0.65	0.0071	0.000159522	C1_10170W_A HYR1 SOD5 HGT20 OPT7 PGA10 ECE1 HWP1 C5_01070C_A PLB1 SAP5 IHD1C7_03310W_A
Efg1p	0.65	0.0093	6.25237e-06	HYR1 SOD5 GIT1 PGA10 ECE1 HWP1 TNA1 SAP5 C6_03600C_A IHD1 C7_00430W_A LIP8C7_03310W_A
Ndt80p	0.6	0.0108	3.20991e-06	HYR1 SOD5 AMO1 GIT1 OPT7 ECE1 HWP1 C5_01070C_A SAP5 C6_03600C_A IHD1C7_00430W_A
Tye7p	0.6	0.0081	9.07688e-05	HYR1 SOD5 AMO1 GIT1 PGA10 ECE1 HWP1 C5_01070C_A TNA1 IHD1 C7_00430W_A SEO1
Rca1p	0.55	0.0214	5.04165e-09	HYR1 HGT20 AMO1 GIT1 OPT7 ECE1 HWP1 TNA1 IHD1 C7_03310W_A SEO1
Sfl2p	0.55	0.0094	4.37465e-05	HYR1 AMO1 GIT1 OPT7 PGA10 ECE1 HWP1 TNA1 PLB1 SAP5 IHD1
Fkh2p	0.5	0.0112	2.08765e-05	HYR1 SOD5 PGA10 ECE1 HWP1 C5_01070C_A SAP5 IHD1 C7_03310W_A SEO1
Sfl1p	0.5	0.0065	0.00293854	HYR1 SOD5 AMO1 ECE1 HWP1 C5_01070C_A SAP5 C6_03600C_A IHD1 C7_00430W_A
Cbf1p	0.45	0.008	0.000991859	HYR1 HGT20 GIT1 OPT7 PGA10 TNA1 C7_00430W_A LIP8 SEO1
Bcr1p	0.4	0.0231	4.04842e-07	HYR1 SOD5 PGA10 ECE1 HWP1 SAP5 IHD1 C7_00430W_A
Rim101p	0.4	0.0162	7.73301e-06	HYR1 SOD5 GIT1 PGA10 ECE1 HWP1 SAP5 IHD1
Csr1p	0.4	0.0152	1.29659e-05	HYR1 SOD5 ECE1 HWP1 SAP5 IHD1 C7_00430W_A C7_03310W_A
Sko1p	0.4	0.0059	0.0163277	PGA10 ECE1 HWP1 C5_01070C_A IHD1 C7_00430W_A C7_03310W_A SEO1
Cph1p	0.35	0.0642	6.46819e-10	HYR1 SOD5 PGA10 ECE1 HWP1 SAP5 IHD1
Tec1p	0.35	0.0145	6.03256e-05	HYR1 SOD5 ECE1 HWP1 SAP5 C6_03600C_A IHD1
Ahr1p	0.35	0.0194	7.11613e-06	SOD5 GIT1 HWP1 SAP5 IHD1 C7_00430W_A SEO1
Cph2p	0.3	0.0239	7.18327e-06	C1_10170W_A HYR1 ECE1 HWP1 SAP5 C7_00430W_A
Cwt1p	0.3	0.0193	2.92782e-05	HYR1 AMO1 PGA10 C5_01070C_A PLB1 IHD1
Zcf39p	0.3	0.1622	9.566e-12	HYR1 PGA10 ECE1 HWP1 SAP5 IHD1
Suc1p	0.3	0.1538	1.4239e-11	HYR1 SOD5 PGA10 ECE1 HWP1 SAP5
Taf14p	0.3	0.0714	3.86404e-09	HYR1 SOD5 ECE1 HWP1 SAP5 IHD1
Try2p	0.3	0.12	9.0644e-11	HYR1 SOD5 PGA10 ECE1 HWP1 SAP5
Try3p	0.3	0.0882	8.51471e-10	HYR1 SOD5 PGA10 ECE1 HWP1 SAP5
Try5p	0.3	0.0909	6.86508e-10	HYR1 SOD5 PGA10 ECE1 HWP1 SAP5
Try6p	0.3	0.1364	3.5156e-11	HYR1 SOD5 PGA10 ECE1 HWP1 SAP5
Uga33p	0.3	0.0923	6.14813e-10	HYR1 SOD5 PGA10 ECE1 HWP1 SAP5
Zcf8p	0.3	0.1667	7.77e-12	HYR1 SOD5 ECE1 HWP1 SAP5 IHD1
Rfg1p	0.3	0.0375	3.46149e-07	SOD5 ECE1 HWP1 C5_01070C_A SAP5 IHD1
Brg1p	0.3	0.0214	1.51106e-05	OPT7 ECE1 HWP1 C6_03600C_A IHD1 C7_00430W_A
Flo8p	0.25	0.25	1.6678e-11	HYR1 ECE1 HWP1 SAP5 IHD1
Snf5p	0.25	0.0327	5.37764e-06	HYR1 SOD5 ECE1 SAP5 IHD1
Ume6p	0.25	0.0162	0.00027832	HYR1 SOD5 ECE1 HWP1 C5_01070C_A
Zcf28p	0.25	0.1471	5.63424e-10	HYR1 SOD5 ECE1 HWP1 SAP5
Upc2p	0.25	0.0086	0.0075261	PGA10 C5_01070C_A TNA1 PLB1 IHD1
Hap43p	0.2	0.0057	0.0628002	C1_10170W_A HYR1 OPT7 PGA10
Cap1p	0.2	0.0125	0.00267587	HYR1 ECE1 HWP1 SEO1
Hmo1p	0.2	0.0042	0.16716	HYR1 GIT1 LIP8 C7_03310W_A
Wor1p	0.2	0.0109	0.0047888	HYR1 HWP1 SAP5 C6_03600C_A
Ace2p	0.2	0.0043	0.157577	SOD5 PGA10 C5_01070C_A IHD1
Cas5p	0.2	0.0088	0.0117075	SOD5 OPT7 PLB1 SAP5
Aft2p	0.15	0.1579	2.75501e-07	HYR1 ECE1 HWP1
Met4p	0.15	0.0283	0.000295773	HYR1 PGA10 HWP1
Rfx2p	0.15	0.25	3.5688e-08	HYR1 ECE1 HWP1
Rpn4p	0.15	0.0361	0.000114664	HYR1 ECE1 IHD1
Tcc1p	0.15	0.75	7.3278e-11	HYR1 ECE1 HWP1
Not3p	0.15	0.1304	6.24307e-07	ECE1 HWP1 SAP5
Rlm1p	0.15	0.0303	0.000227351	ECE1 HWP1 IHD1
Zfu2p	0.1	0.1333	1.20789e-05	SOD5 PGA10
Mrr1p	0.1	0.0035	0.270719	HGT20 SAP5
Rgt1p	0.1	0.0083	0.0391693	GIT1 IHD1
Crk1p	0.1	1	0	ECE1 HWP1
Hap2p	0.1	0.6667	2.71991e-08	ECE1 HWP1
Hap5p	0.1	0.2222	2.25717e-06	ECE1 HWP1
Mss11p	0.1	0.0091	0.0307224	ECE1 HWP1
Ssn6p	0.1	1	0	ECE1 HWP1
Tbf1p	0.1	0.0077	0.0473394	TNA1 PLB1
Sut1p	0.05	0.0204	0.0102577	HYR1
Wor2p	0.05	0.0081	0.0577582	HYR1
Zcf31p	0.05	0.05	0.00175094	SOD5
Sef1p	0.05	0.0112	0.0316737	HGT20
Try4p	0.05	0.0139	0.0213466	PGA10
Efh1p	0.05	0.0217	0.0090792	ECE1
Hms1p	0.05	0.0058	0.102838	HWP1
Rbf1p	0.05	0.3333	2.85546e-05	HWP1
Sfp1p	0.05	0.1667	0.00014196	HWP1
Fhl1p	0.05	0.0061	0.0939464	TNA1
Ifh1p	0.05	0.0068	0.0787734	TNA1
Rap1p	0.05	0.0175	0.0137121	TNA1
War1p	0.05	0.1111	0.000338766	SAP5
Wor3p	0.05	0.0075	0.0662392	IHD1
Sfu1p	0.05	0.0312	0.00446796	SEO1
